# Supplementary material for: Transcriptome Analysis in Chicken Cecal Epithelia upon Infection by Eimeria tenella In Vivo
Source: PLOS journal article supplement (doi:10.1371/journal.pone.0064236), 2013-05-30
Supplement: S6 (10.1371/journal.pone.0064236.s006) [file journal.pone.0064236.s006]

**Table S4.** List of differentially expressed genes that could be manually assigned into major functional groups. Up-regulated genes are in red, while down-regulated genes are in blue font.

| Manually annotated group          | Probe Set ID            | Gene description                                                                      | Fold change |
|-----------------------------------|-------------------------|---------------------------------------------------------------------------------------|-------------|
| Cell death/growth/differentiation | Gga.5710.2.S1_a_at      | HtrA serine peptidase 3                                                               | 16.757      |
| Cell death/growth/differentiation | Gga.5164.1.S2_at        | BCL2-related protein A1                                                               | 13.157      |
| Cell death/growth/differentiation | Gga.2582.1.S1_at        | transforming growth factor, beta-induced, 68kDa                                       | 13.131      |
| Cell death/growth/differentiation | Gga.1247.1.S2_at        | B6.1                                                                                  | 11.957      |
| Cell death/growth/differentiation | Gga.744.1.S1_at         | GATA binding protein 3                                                                | 9.192       |
| Cell death/growth/differentiation | Gga.3179.1.S2_at        | brain abundant, membrane attached signal protein 1                                    | 8.359       |
| Cell death/growth/differentiation | GgaAffx.12413.1.S1_at   | RNA binding motif protein 38                                                          | 6.574       |
| Cell death/growth/differentiation | Gga.5164.1.S1_at        | BCL2-related protein A1                                                               | 5.638       |
| Cell death/growth/differentiation | Gga.11726.1.S1_a_at     | Growth arrest and DNA-damage-inducible, gamma                                         | 5.443       |
| Cell death/growth/differentiation | GgaAffx.21663.1.S1_s_at | hepatoma-derived growth factor, related protein 3                                     | 5.272       |
| Cell death/growth/differentiation | Gga.7539.1.S1_at        | forkhead box L2                                                                       | 4.678       |
| Cell death/growth/differentiation | Gga.4328.1.S1_at        | insulin-like growth factor binding protein 7                                          | 4.173       |
| Cell death/growth/differentiation | Gga.9179.1.S1_at        | death-associated protein kinase 1                                                     | 3.825       |
| Cell death/growth/differentiation | GgaAffx.12808.1.S1_s_at | shisa homolog 5 ( <i>Xenopus laevis</i> )                                             | 3.553       |
| Cell death/growth/differentiation | Gga.4720.3.S1_a_at      | coiled-coil domain containing 21                                                      | 3.546       |
| Cell death/growth/differentiation | Gga.7709.1.S1_at        | death-associated protein kinase 1                                                     | 3.509       |
| Cell death/growth/differentiation | Gga.4176.1.S1_at        | eukaryotic translation initiation factor 5A2                                          | 3.219       |
| Cell death/growth/differentiation | Gga.2628.1.S1_s_at      | cyclin D2                                                                             | 0.482       |
| Cell death/growth/differentiation | Gga.1325.1.S1_at        | MAD1 mitotic arrest deficient-like 1 (yeast)                                          | 0.453       |
| Cell death/growth/differentiation | GgaAffx.4278.2.S1_s_at  | transforming growth factor, beta receptor associated protein 1                        | 0.448       |
| Cell death/growth/differentiation | Gga.2554.1.A1_at        | transforming growth factor, beta 3                                                    | 0.399       |
| Cell death/growth/differentiation | Gga.10930.1.S1_at       | BCL2-like 13 (apoptosis facilitator)                                                  | 0.396       |
| Cell death/growth/differentiation | GgaAffx.10239.1.S1_at   | optic atrophy 1 (autosomal dominant)                                                  | 0.395       |
| Cell death/growth/differentiation | GgaAffx.24127.1.S1_at   | fibroblast growth factor receptor 1                                                   | 0.372       |
| Cell death/growth/differentiation | GgaAffx.25789.4.S1_s_at | fibroblast growth factor 1 (acidic)                                                   | 0.283       |
| Cell death/growth/differentiation | GgaAffx.4984.1.S1_at    | cell division cycle 2, G1 to S and G2 to M                                            | 0.258       |
| Cell death/growth/differentiation | GgaAffx.10104.2.S1_s_at | Gametocyte specific factor 1                                                          | 0.245       |
| Chaperonin/HSP                    | GgaAffx.4144.1.S1_s_at  | DnaJ (Hsp40) homolog, subfamily A, member 4                                           | 0.491       |
| Chaperonin/HSP                    | GgaAffx.5862.1.S1_at    | t-complex 1                                                                           | 0.462       |
| Chaperonin/HSP                    | GgaAffx.4681.1.S1_at    | t-complex 11 (mouse)-like 2                                                           | 0.391       |
| Chaperonin/HSP                    | GgaAffx.193.1.S1_at     | DnaJ (Hsp40) homolog, subfamily C, member 11                                          | 0.387       |
| Chaperonin/HSP                    | GgaAffx.6430.1.S1_at    | chaperonin containing TCP1, subunit 2 (beta)                                          | 0.379       |
| Cytoskeletal components/regulator | GgaAffx.21017.1.S1_s_at | caldesmon 1                                                                           | 29.979      |
| Cytoskeletal components/regulator | Gga.4091.1.S2_a_at      | myosin, light chain kinase                                                            | 23.408      |
| Cytoskeletal components/regulator | GgaAffx.21386.1.S1_s_at | caldesmon 1                                                                           | 16.044      |
| Cytoskeletal components/regulator | Gga.4988.2.S1_a_at      | caldesmon 1                                                                           | 14.532      |
| Cytoskeletal components/regulator | Gga.1294.1.S1_at        | myosin IF                                                                             | 10.163      |
| Cytoskeletal components/regulator | Gga.1009.1.S1_s_at      | actin related protein 2/3 complex, subunit 1B, 41kDa                                  | 8.429       |
| Cytoskeletal components/regulator | Gga.2268.1.S1_at        | centrosomal protein 170kDa                                                            | 8.138       |
| Cytoskeletal components/regulator | GgaAffx.12091.1.S1_at   | calponin 2                                                                            | 7.683       |
| Cytoskeletal components/regulator | Gga.13147.1.S1_at       | Kinesin light chain 1                                                                 | 6.638       |
| Cytoskeletal components/regulator | Gga.1009.2.S1_s_at      | actin related protein 2/3 complex, subunit 1B, 41kDa                                  | 6.556       |
| Cytoskeletal components/regulator | Gga.1350.1.S1_at        | ARP3 actin-related protein 3 homolog B (yeast)                                        | 5.890       |
| Cytoskeletal components/regulator | Gga.11948.2.S1_a_at     | Kinesin light chain 1                                                                 | 5.404       |
| Cytoskeletal components/regulator | Gga.4533.6.A1_at        | Dynein, light chain, Tctex-type 1                                                     | 4.778       |
| Cytoskeletal components/regulator | Gga.3908.1.S1_at        | transgelin                                                                            | 4.369       |
| Cytoskeletal components/regulator | Gga.4661.2.S1_at        | tubulin, alpha 1c                                                                     | 3.717       |
| Cytoskeletal components/regulator | Gga.1746.1.S1_s_at      | similar to kinesin, putative                                                          | 3.638       |
| Cytoskeletal components/regulator | Gga.10463.1.S1_s_at     | cytoskeleton associated protein 5                                                     | 3.501       |
| Cytoskeletal components/regulator | Gga.7794.1.S1_at        | tubulin, beta 6                                                                       | 3.342       |
| Cytoskeletal components/regulator | Gga.8075.1.S1_at        | Kinesin family member 5C                                                              | 3.211       |
| Cytoskeletal components/regulator | Gga.16889.1.S1_at       | myosin regulatory light chain interacting protein                                     | 3.056       |
| Cytoskeletal components/regulator | Gga.4425.1.S1_at        | Myosin VI                                                                             | 0.488       |
| Cytoskeletal components/regulator | Gga.8635.1.S1_at        | tubulin folding cofactor E                                                            | 0.458       |
| Cytoskeletal components/regulator | GgaAffx.21775.1.S1_s_at | microtubule-associated protein 4                                                      | 0.442       |
| Cytoskeletal components/regulator | GgaAffx.2648.1.S1_s_at  | microtubule associated monooxygenase, calponin and LIM domain containing 3            | 0.437       |
| Cytoskeletal components/regulator | GgaAffx.2572.1.S1_at    | dynein, cytoplasmic 1, light intermediate chain 1                                     | 0.420       |
| Cytoskeletal components/regulator | GgaAffx.10140.2.S1_s_at | kinesin family member 18A                                                             | 0.393       |
| Cytoskeletal components/regulator | Gga.4830.1.S1_at        | Actin, gamma 1                                                                        | 0.363       |
| Cytoskeletal components/regulator | Gga.11487.1.S1_s_at     | centromere protein E, 312kDa                                                          | 0.363       |
| DNA replication/repair            | Gga.18956.1.S1_s_at     | polymerase (DNA directed), lambda                                                     | 3.015       |
| DNA replication/repair            | Gga.18300.1.S1_at       | excision repair cross-complementing rodent repair deficiency, complementation group 5 | 0.498       |
| DNA replication/repair            | Gga.7505.1.S1_at        | REX2, RNA exonuclease 2 homolog ( <i>S. cerevisiae</i> )                              | 0.491       |
| DNA replication/repair            | Gga.2148.4.S1_a_at      | exonuclease NEF-sp                                                                    | 0.484       |
| DNA replication/repair            | Gga.10998.1.S1_s_at     | RAD18 homolog ( <i>S. cerevisiae</i> )                                                | 0.476       |
| DNA replication/repair            | GgaAffx.24832.2.S1_s_at | breast cancer 1, early onset                                                          | 0.475       |
| DNA replication/repair            | GgaAffx.26038.1.S1_at   | polymerase (DNA-directed), delta 3, accessory subunit                                 | 0.465       |
| DNA replication/repair            | Gga.4315.2.S1_a_at      | replication protein A2, 32kDa                                                         | 0.455       |

|                            |                         |                                                                                        |        |
|----------------------------|-------------------------|----------------------------------------------------------------------------------------|--------|
| DNA replication/repair     | Gga.710.6.S1_a_at       | polymerase (DNA directed), gamma                                                       | 0.450  |
| DNA replication/repair     | GgaAffx.4442.3.S1_s_at  | replication factor C (activator 1) 3, 38kDa                                            | 0.440  |
| DNA replication/repair     | Gga.11871.1.S1_at       | minichromosome maintenance complex component 2                                         | 0.435  |
| DNA replication/repair     | Gga.12043.2.S1_a_at     | polymerase (DNA-directed), delta interacting protein 3                                 | 0.428  |
| DNA replication/repair     | GgaAffx.7758.2.S1_s_at  | DNA2 DNA replication helicase 2-like (yeast)                                           | 0.408  |
| DNA replication/repair     | GgaAffx.21825.1.S1_s_at | RAD51-like 1 (S. cerevisiae)                                                           | 0.398  |
| DNA replication/repair     | GgaAffx.25679.1.S1_s_at | poly (ADP-ribose) polymerase family, member 11                                         | 0.380  |
| Extracellular matrix       | Gga.12800.1.S1_at       | matrix metalloproteinase 3 (stromelysin 1, progelatinase)                              | 67.335 |
| Extracellular matrix       | Gga.3994.3.S1_x_at      | Fibronectin 1                                                                          | 23.201 |
| Extracellular matrix       | Gga.9293.1.S1_at        | Fibronectin 1                                                                          | 21.558 |
| Extracellular matrix       | Gga.4078.1.S1_at        | lumican                                                                                | 21.079 |
| Extracellular matrix       | Gga.701.1.S1_s_at       | leukocyte ribonuclease A-1 /// leukocyte ribonuclease A-2                              | 20.283 |
| Extracellular matrix       | Gga.4851.1.S1_at        | collagen, type III, alpha 1                                                            | 19.577 |
| Extracellular matrix       | GgaAffx.21771.1.S1_at   | collagen, type VI, alpha 1                                                             | 16.921 |
| Extracellular matrix       | Gga.2073.1.S1_at        | Alpha-1 collagen (I)                                                                   | 16.450 |
| Extracellular matrix       | Gga.4941.1.S1_at        | cadherin 11, type 2, OB-cadherin (osteoblast)                                          | 15.052 |
| Extracellular matrix       | Gga.4128.1.S2_at        | tensin 1                                                                               | 14.084 |
| Extracellular matrix       | Gga.3199.1.S1_at        | matrix metalloproteinase 2 (gelatinase A, 72kDa gelatinase, 72kDa type IV collagenase) | 13.372 |
| Extracellular matrix       | Gga.20018.1.S1_at       | thrombospondin                                                                         | 12.438 |
| Extracellular matrix       | Gga.4851.1.A1_at        | collagen, type III, alpha 1                                                            | 11.954 |
| Extracellular matrix       | Gga.5255.1.S1_at        | EGF-containing fibulin-like extracellular matrix protein 1                             | 11.838 |
| Extracellular matrix       | Gga.12928.1.S1_at       | vascular cell adhesion molecule 1                                                      | 11.757 |
| Extracellular matrix       | Gga.540.1.S1_at         | matrix Gla protein                                                                     | 11.638 |
| Extracellular matrix       | GgaAffx.11018.1.S1_s_at | matrix metalloproteinase 1 (interstitial collagenase)                                  | 11.544 |
| Extracellular matrix       | Gga.5171.1.S1_at        | cadherin 5, type 2, VE-cadherin (vascular epithelium)                                  | 10.552 |
| Extracellular matrix       | Gga.1099.1.S1_at        | annexin A6                                                                             | 10.396 |
| Extracellular matrix       | Gga.4999.2.S1_at        | integrin, alpha 4 (antigen CD49D, alpha 4 subunit of VLA-4 receptor)                   | 10.191 |
| Extracellular matrix       | Gga.4884.1.S1_at        | annexin A1                                                                             | 9.299  |
| Extracellular matrix       | Gga.3104.1.S1_at        | collagen, type IV, alpha 2                                                             | 9.177  |
| Extracellular matrix       | GgaAffx.6053.1.S1_at    | collagen, type I, alpha 2                                                              | 7.860  |
| Extracellular matrix       | Gga.4507.1.S1_at        | integrin, beta 2 (complement component 3 receptor 3 and 4 subunit)                     | 7.479  |
| Extracellular matrix       | GgaAffx.5654.1.S1_at    | integrin, alpha 4 (antigen CD49D, alpha 4 subunit of VLA-4 receptor)                   | 7.224  |
| Extracellular matrix       | Gga.12039.1.S1_a_at     | Matrix-remodelling associated 5                                                        | 6.951  |
| Extracellular matrix       | GgaAffx.25534.1.S1_s_at | collagen, type III, alpha 1                                                            | 6.917  |
| Extracellular matrix       | GgaAffx.25192.2.S1_s_at | matrix metalloproteinase 1 (interstitial collagenase)                                  | 6.677  |
| Extracellular matrix       | Gga.9346.3.S1_a_at      | vimentin                                                                               | 6.418  |
| Extracellular matrix       | Gga.19452.1.S1_at       | CD44 molecule (Indian blood group)                                                     | 6.208  |
| Extracellular matrix       | Gga.1168.1.S1_at        | annexin A5                                                                             | 6.099  |
| Extracellular matrix       | Gga.2679.1.S1_at        | fibulin 1                                                                              | 6.062  |
| Extracellular matrix       | Gga.5776.1.S1_at        | CD34 molecule                                                                          | 5.897  |
| Extracellular matrix       | GgaAffx.21790.1.S1_s_at | gap junction protein, alpha 1, 43kDa                                                   | 5.744  |
| Extracellular matrix       | Gga.4051.1.S1_at        | connective tissue growth factor                                                        | 5.690  |
| Extracellular matrix       | GgaAffx.11429.1.S1_s_at | matrix metalloproteinase 7 (matrilysin, uterine)                                       | 5.654  |
| Extracellular matrix       | Gga.6223.1.S1_at        | ADAM metalloproteinase domain 33                                                       | 5.243  |
| Extracellular matrix       | Gga.4257.1.S1_at        | collagen, type VI, alpha 2                                                             | 5.106  |
| Extracellular matrix       | Gga.566.1.S1_at         | integrin, alpha 1                                                                      | 4.793  |
| Extracellular matrix       | Gga.13442.1.S2_s_at     | radixin                                                                                | 4.708  |
| Extracellular matrix       | Gga.3572.1.S1_at        | CD44 molecule (Indian blood group)                                                     | 4.619  |
| Extracellular matrix       | Gga.2965.1.S1_at        | TIMP metalloproteinase inhibitor 2                                                     | 4.032  |
| Extracellular matrix       | GgaAffx.22999.1.S1_s_at | collagen, type I, alpha 2                                                              | 3.892  |
| Extracellular matrix       | Gga.13442.1.S1_at       | radixin                                                                                | 3.637  |
| Extracellular matrix       | Gga.1776.1.S1_at        | nidogen 1                                                                              | 3.562  |
| Extracellular matrix       | Gga.3572.1.S2_s_at      | CD44 molecule (Indian blood group)                                                     | 3.164  |
| Extracellular matrix       | Gga.888.1.S1_at         | collagen, type VI, alpha 3                                                             | 3.103  |
| Extracellular matrix       | Gga.198.1.S1_at         | matrix metalloproteinase 9 (gelatinase B, 92kDa gelatinase, 92kDa type IV collagenase) | 3.028  |
| Extracellular matrix       | GgaAffx.26220.2.S1_s_at | integrin beta 1 binding protein 3                                                      | 0.480  |
| Extracellular matrix       | GgaAffx.6391.2.S1_s_at  | integrator complex subunit 2                                                           | 0.475  |
| Extracellular matrix       | GgaAffx.22425.1.S1_s_at | collagen, type XX, alpha 1                                                             | 0.394  |
| Extracellular matrix       | GgaAffx.5541.1.S1_at    | Discoidin, CUB and LCCL domain containing 1                                            | 0.356  |
| Gene expression/regulation | Gga.3548.1.S1_at        | zinc finger E-box binding homeobox 1                                                   | 13.018 |
| Gene expression/regulation | Gga.2551.2.S1_s_at      | lactotransferrin                                                                       | 11.137 |
| Gene expression/regulation | Gga.1313.1.S1_s_at      | spleen focus forming virus (SFFV) proviral integration oncogene spi1                   | 10.008 |
| Gene expression/regulation | GgaAffx.20792.1.S1_s_at | zinc finger E-box binding homeobox 1                                                   | 8.993  |
| Gene expression/regulation | GgaAffx.12062.1.S1_s_at | Friend leukemia virus integration 1                                                    | 8.875  |
| Gene expression/regulation | GgaAffx.3506.1.S1_at    | ecotropic viral integration site 2B                                                    | 7.990  |
| Gene expression/regulation | Gga.4285.1.S1_at        | CCAAT/enhancer binding protein (C/EBP), beta                                           | 7.344  |
| Gene expression/regulation | Gga.6066.1.S1_at        | transcription factor 7 (T-cell specific, HMG-box)                                      | 7.083  |
| Gene expression/regulation | Gga.1378.1.S1_s_at      | histone deacetylase 9                                                                  | 5.821  |
| Gene expression/regulation | Gga.3731.2.S1_a_at      | gammaFDP-A                                                                             | 5.230  |

|                            |                         |                                                                                               |        |
|----------------------------|-------------------------|-----------------------------------------------------------------------------------------------|--------|
| Gene expression/regulation | Gga.6375.1.S1_at        | basic helix-loop-helix domain containing, class B, 8                                          | 5.205  |
| Gene expression/regulation | Gga.4919.1.S2_at        | CUG triplet repeat, RNA binding protein 2 /// hypothetical protein LOC769811                  | 5.086  |
| Gene expression/regulation | Gga.1108.1.S1_s_at      | limb bud and heart development homolog (mouse)                                                | 4.534  |
| Gene expression/regulation | Gga.4954.2.S1_a_at      | TNFAIP3 interacting protein 1                                                                 | 4.510  |
| Gene expression/regulation | Gga.4371.1.S1_s_at      | putative homeodomain transcription factor 2                                                   | 4.202  |
| Gene expression/regulation | Gga.578.1.S1_at         | IKAROS family zinc finger 1 (IkaroS)                                                          | 4.108  |
| Gene expression/regulation | GgaAffx.21436.1.S1_s_at | basic leucine zipper transcription factor, ATF-like                                           | 3.617  |
| Gene expression/regulation | Gga.49.1.S1_at          | chromobox homolog 4 (Pc class homolog, Drosophila)                                            | 3.394  |
| Gene expression/regulation | GgaAffx.24709.1.S1_s_at | microphthalmia-associated transcription factor                                                | 0.498  |
| Gene expression/regulation | Gga.16862.1.S1_at       | TATA element modulatory factor 1                                                              | 0.492  |
| Gene expression/regulation | GgaAffx.2752.1.S1_s_at  | MAX interactor 1                                                                              | 0.491  |
| Gene expression/regulation | GgaAffx.4023.1.S1_at    | REV3-like, catalytic subunit of DNA polymerase zeta (yeast)                                   | 0.490  |
| Gene expression/regulation | GgaAffx.8903.3.S1_at    | nuclear receptor subfamily 6, group A, member 1                                               | 0.487  |
| Gene expression/regulation | GgaAffx.21044.1.S1_s_at | pseudouridylate synthase 7 homolog (S. cerevisiae)                                            | 0.482  |
| Gene expression/regulation | GgaAffx.2077.1.S1_s_at  | v-myc myelocytomatosis viral oncogene homolog (avian)                                         | 0.480  |
| Gene expression/regulation | GgaAffx.25677.1.S1_s_at | Sin3A-associated protein, 130kDa                                                              | 0.475  |
| Gene expression/regulation | GgaAffx.23089.1.S1_at   | general transcription factor IIA, 2, 12kDa                                                    | 0.468  |
| Gene expression/regulation | GgaAffx.25648.2.S1_s_at | WD repeat domain 36                                                                           | 0.463  |
| Gene expression/regulation | GgaAffx.26668.2.S1_s_at | nuclear transcription factor Y, gamma                                                         | 0.462  |
| Gene expression/regulation | Gga.2475.1.S1_at        | chromatin modifying protein 6                                                                 | 0.458  |
| Gene expression/regulation | Gga.10895.1.S1_s_at     | threonyl-tRNA synthetase                                                                      | 0.451  |
| Gene expression/regulation | GgaAffx.4249.1.S1_x_at  | CTD (carboxy-terminal domain, RNA polymerase II, polypeptide A) phosphatase, subunit 1        | 0.448  |
| Gene expression/regulation | Gga.4830.1.S2_at        | protein inhibitor of activated STAT, 2                                                        | 0.446  |
| Gene expression/regulation | Gga.5522.2.S1_a_at      | activating signal cointegrator 1 complex subunit 3-like 1                                     | 0.440  |
| Gene expression/regulation | GgaAffx.2639.1.S1_at    | adenosine deaminase, tRNA-specific 1                                                          | 0.437  |
| Gene expression/regulation | GgaAffx.4639.1.S1_at    | splicing factor 3b, subunit 4, 49kDa                                                          | 0.435  |
| Gene expression/regulation | Gga.6487.1.S1_at        | similar to nuclear cap binding protein subunit 2                                              | 0.434  |
| Gene expression/regulation | GgaAffx.9629.1.S1_at    | chromatin licensing and DNA replication factor 1                                              | 0.427  |
| Gene expression/regulation | GgaAffx.20192.1.S1_s_at | ribosomal protein S11                                                                         | 0.417  |
| Gene expression/regulation | Gga.2087.1.S1_s_at      | RNA polymerase 1-3                                                                            | 0.415  |
| Gene expression/regulation | GgaAffx.8122.1.S1_at    | nucleolar protein 5A (56kDa with KKE/D repeat)                                                | 0.415  |
| Gene expression/regulation | Gga.4010.1.S1_s_at      | integrator complex subunit 2                                                                  | 0.415  |
| Gene expression/regulation | Gga.11672.1.S1_at       | PRP4 pre-mRNA processing factor 4 homolog (yeast)                                             | 0.413  |
| Gene expression/regulation | GgaAffx.193.2.S1_s_at   | integrator complex subunit 10                                                                 | 0.412  |
| Gene expression/regulation | Gga.17691.1.S1_at       | activating transcription factor 4 (tax-responsive enhancer element B67)                       | 0.408  |
| Gene expression/regulation | GgaAffx.1279.2.S1_s_at  | caudal type homeobox 2                                                                        | 0.383  |
| Gene expression/regulation | GgaAffx.3047.2.S1_s_at  | ribosomal protein L36                                                                         | 0.342  |
| Gene expression/regulation | GgaAffx.1433.3.S1_s_at  | similar to general transcription factor IIIC, polypeptide 1, alpha 220kDa                     | 0.339  |
| Gene expression/regulation | GgaAffx.10949.1.S1_s_at | ribosomal protein L38                                                                         | 0.333  |
| Gene expression/regulation | GgaAffx.3310.1.S1_s_at  | exonuclease domain containing 1                                                               | 0.319  |
| Gene expression/regulation | Gga.19462.1.S1_s_at     | transcriptional adaptor 2 (ADA2 homolog, yeast)-like                                          | 0.316  |
| Gene expression/regulation | Gga.12360.1.S1_at       | Splicing factor, arginine/serine-rich 3                                                       | 0.315  |
| General metabolism         | Gga.17674.1.S1_at       | Biliverdin reductase A                                                                        | 29.576 |
| General metabolism         | GgaAffx.23872.1.S1_at   | Biliverdin reductase A                                                                        | 14.424 |
| General metabolism         | Gga.739.1.S1_at         | quiescence-specific protein                                                                   | 11.988 |
| General metabolism         | GgaAffx.7420.1.S1_at    | phospholipase D family, member 4                                                              | 8.185  |
| General metabolism         | GgaAffx.26353.1.S1_s_at | GTPase, IMAP family member 8                                                                  | 7.820  |
| General metabolism         | Gga.11830.1.S1_at       | deoxyribonuclease I-like 3                                                                    | 7.752  |
| General metabolism         | Gga.1177.1.S1_at        | ELOVL family member 5, elongation of long chain fatty acids (FEN1/Elo2, SUR4/Elo3-like)       | 7.159  |
| General metabolism         | Gga.6017.1.S1_s_at      | Biliverdin reductase A                                                                        | 7.089  |
| General metabolism         | Gga.6236.1.S1_at        | switch-associated protein 70                                                                  | 7.025  |
| General metabolism         | Gga.7765.1.S1_at        | carbohydrate (N-acetylglucosamine-6-O) sulfotransferase 2                                     | 6.813  |
| General metabolism         | Gga.10928.1.S1_at       | cholesterol 25-hydroxylase                                                                    | 5.922  |
| General metabolism         | GgaAffx.10393.1.S1_at   | cytochrome b-245, beta polypeptide (chronic granulomatous disease)                            | 5.857  |
| General metabolism         | Gga.13365.1.S1_at       | 1-acylglycerol-3-phosphate O-acyltransferase 4 (lysophosphatidic acid acyltransferase, delta) | 5.713  |
| General metabolism         | Gga.14925.1.S1_at       | mannosyl (alpha-1,3-)-glycoprotein beta-1,4-N-acetylglucosaminyltransferase, isozyme A        | 5.460  |
| General metabolism         | Gga.3807.1.S2_s_at      | aldehyde dehydrogenase 1 family, member A3                                                    | 5.432  |
| General metabolism         | Gga.4401.1.S1_a_at      | prostaglandin-endoperoxide synthase 2 (prostaglandin G/H synthase and cyclooxygenase)         | 5.150  |
| General metabolism         | Gga.14426.1.S1_at       | lipase A, lysosomal acid, cholesterol esterase (Wolman disease)                               | 4.885  |
| General metabolism         | Gga.7148.2.A1_at        | phospholipase C, gamma 2 (phosphatidylinositol-specific)                                      | 4.612  |
| General metabolism         | Gga.6612.2.A1_at        | NK-lysin                                                                                      | 4.252  |
| General metabolism         | GgaAffx.12860.1.S1_at   | thioredoxin domain containing 5 (endoplasmic reticulum)                                       | 4.149  |
| General metabolism         | Gga.12233.1.S1_at       | N-acylsphingosine amidohydrolase (acid ceramidase)-like                                       | 4.123  |
| General metabolism         | Gga.7640.2.S1_at        | Acyl-CoA synthetase long-chain family member 4                                                | 4.017  |
| General metabolism         | GgaAffx.3425.1.S1_at    | phospholipase C, gamma 2 (phosphatidylinositol-specific)                                      | 4.003  |

|                    |                         |                                                                                           |        |
|--------------------|-------------------------|-------------------------------------------------------------------------------------------|--------|
| General metabolism | Gga.9879.1.S1_s_at      | lipase A, lysosomal acid, cholesterol esterase (Wolman disease)                           | 3.893  |
| General metabolism | Gga.3323.1.S1_s_at      | fatty acid binding protein 5                                                              | 3.892  |
| General metabolism | GgaAffx.1032.1.S1_s_at  | inositol polyphosphate-5-phosphatase, 145kDa                                              | 3.863  |
| General metabolism | GgaAffx.12708.1.S1_s_at | similar to ornithine aminotransferase (gyrate atrophy) /// ornithine aminotransferase     | 3.692  |
| General metabolism | Gga.1161.1.S1_at        | succinate dehydrogenase complex, subunit D, integral membrane protein                     | 3.504  |
| General metabolism | GgaAffx.22378.1.S1_s_at | phospholipase C, gamma 2 (phosphatidylinositol-specific)                                  | 3.219  |
| General metabolism | Gga.7148.1.S1_at        | phospholipase C, gamma 2 (phosphatidylinositol-specific)                                  | 3.218  |
| General metabolism | Gga.1758.1.S1_at        | Arachidonate 5-lipoxygenase-activating protein                                            | 3.208  |
| General metabolism | Gga.7640.1.S1_a_at      | Acyl-CoA synthetase long-chain family member 4                                            | 3.201  |
| General metabolism | Gga.593.1.S1_s_at       | ADP-ribosyltransferase /// ADP-ribosyltransferase                                         | 3.188  |
| General metabolism | GgaAffx.4938.1.S1_at    | phosphatidylinositol-5-phosphate 4-kinase, type II, alpha                                 | 3.020  |
| General metabolism | Gga.10824.1.S1_s_at     | N-acetylglucosaminyltransferase VI                                                        | 0.490  |
| General metabolism | Gga.7294.1.S1_at        | choline phosphotransferase 1                                                              | 0.490  |
| General metabolism | Gga.9508.1.S1_at        | glutamine-fructose-6-phosphate transaminase 1                                             | 0.488  |
| General metabolism | GgaAffx.3796.1.S1_s_at  | phosphorylase kinase, beta                                                                | 0.486  |
| General metabolism | GgaAffx.22454.1.S1_s_at | arachidonate 5-lipoxygenase                                                               | 0.484  |
| General metabolism | GgaAffx.12570.1.S1_s_at | Oxysterol binding protein-like 11                                                         | 0.483  |
| General metabolism | GgaAffx.21140.1.S1_s_at | NADH dehydrogenase (ubiquinone) 1 alpha subcomplex, 2, 8kDa                               | 0.476  |
| General metabolism | GgaAffx.23988.2.S1_s_at | gallinacin 1                                                                              | 0.475  |
| General metabolism | Gga.2908.1.S1_at        | asparagine-linked glycosylation 11 homolog (S. cerevisiae, alpha-1,2-mannosyltransferase) | 0.472  |
| General metabolism | GgaAffx.24513.9.S1_s_at | asparagine-linked glycosylation 8 homolog (S. cerevisiae, alpha-1,3-glucosyltransferase)  | 0.470  |
| General metabolism | GgaAffx.26615.2.S1_s_at | Similar to dermatan 4-sulfotransferase-1                                                  | 0.466  |
| General metabolism | Gga.11674.1.S1_at       | methyltransferase like 8                                                                  | 0.442  |
| General metabolism | GgaAffx.24884.1.S1_s_at | dUTP pyrophosphatase                                                                      | 0.438  |
| General metabolism | Gga.5263.3.S1_s_at      | phospholipase C-like 2                                                                    | 0.438  |
| General metabolism | GgaAffx.882.2.S1_s_at   | acyl-CoA synthetase long-chain family member 5                                            | 0.432  |
| General metabolism | Gga.8991.1.S1_at        | glutathione S-transferase theta 1                                                         | 0.424  |
| General metabolism | Gga.17281.1.S1_at       | UDP-Gal:betaGlcNAc beta 1,4- galactosyltransferase, polypeptide 1                         | 0.417  |
| General metabolism | Gga.11447.1.S1_a_at     | K(lysine) acetyltransferase 2A                                                            | 0.408  |
| General metabolism | GgaAffx.23111.1.S1_s_at | uridine phosphorylase 2                                                                   | 0.397  |
| General metabolism | GgaAffx.25247.1.S1_at   | UDP-glucuronate decarboxylase 1                                                           | 0.395  |
| General metabolism | Gga.17284.1.S1_at       | serine racemase                                                                           | 0.375  |
| General metabolism | GgaAffx.24100.1.S1_s_at | steroid 5 alpha-reductase 3                                                               | 0.365  |
| General metabolism | GgaAffx.26520.1.S1_s_at | UDP-glucose pyrophosphorylase 2                                                           | 0.364  |
| General metabolism | Gga.12113.1.A1_at       | methyltransferase like 14                                                                 | 0.359  |
| General metabolism | GgaAffx.10350.1.S1_at   | 5'-nucleotidase, cytosolic III-like                                                       | 0.356  |
| General metabolism | Gga.9596.1.S1_at        | cytochrome P450, family 39, subfamily A, polypeptide 1                                    | 0.351  |
| General metabolism | GgaAffx.21089.1.S1_s_at | STT3, subunit of the oligosaccharyltransferase complex, homolog B (S. cerevisiae)         | 0.349  |
| General metabolism | GgaAffx.5994.1.S1_at    | methyltransferase like 10                                                                 | 0.304  |
| Immunity/defense   | Gga.12186.1.S1_at       | lymphatic vessel endothelial hyaluronan receptor 1                                        | 32.611 |
| Immunity/defense   | Gga.1020.1.S1_at        | chemokine (C-C motif) ligand 17                                                           | 29.428 |
| Immunity/defense   | Gga.701.1.S1_at         | leukocyte ribonuclease A-2                                                                | 18.493 |
| Immunity/defense   | Gga.9873.1.S1_at        | complement component 1, q subcomponent, C chain                                           | 16.683 |
| Immunity/defense   | Gga.5396.1.S1_at        | complement component 1, q subcomponent, B chain                                           | 14.962 |
| Immunity/defense   | Gga.7298.1.S1_at        | complement component 1, q subcomponent, A chain                                           | 14.601 |
| Immunity/defense   | Gga.11955.1.S1_at       | Immunoglobulin superfamily, member 6                                                      | 14.396 |
| Immunity/defense   | Gga.9513.1.S2_at        | Chemokine (C-X-C motif) ligand 12 (stromal cell-derived factor 1)                         | 13.883 |
| Immunity/defense   | Gga.9133.1.S1_at        | Chemokine ah221                                                                           | 12.744 |
| Immunity/defense   | Gga.4374.1.S1_a_at      | interferon regulatory factor 4                                                            | 12.149 |
| Immunity/defense   | Gga.3676.1.S1_at        | B cell RAG associated protein                                                             | 12.106 |
| Immunity/defense   | Gga.4681.2.S1_s_at      | dedicator of cytokinesis 10                                                               | 11.854 |
| Immunity/defense   | GgaAffx.2960.1.S1_s_at  | complement component 1, q subcomponent, B chain                                           | 11.824 |
| Immunity/defense   | Gga.703.1.S1_at         | leukocyte ribonuclease A-1                                                                | 11.803 |
| Immunity/defense   | Gga.916.1.S2_at         | interferon, gamma                                                                         | 11.653 |
| Immunity/defense   | Gga.1307.1.S1_s_at      | interleukin 16 (lymphocyte chemoattractant factor)                                        | 11.579 |
| Immunity/defense   | Gga.2467.1.S1_at        | immunoglobulin J polypeptide, linker protein for immunoglobulin alpha and mu polypeptides | 11.272 |
| Immunity/defense   | Gga.17679.1.S1_s_at     | immunoglobulin-like receptor CHIR-B5 /// immunoglobulin-like receptor CHIR-B6             | 11.200 |
| Immunity/defense   | Gga.4110.4.S1_x_at      | immunoglobulin lambda-like polypeptide 1                                                  | 11.067 |
| Immunity/defense   | Gga.4110.10.S1_x_at     | immunoglobulin lambda-like polypeptide 1                                                  | 10.715 |
| Immunity/defense   | Gga.5743.1.S1_at        | lymphocyte antigen 96                                                                     | 10.485 |
| Immunity/defense   | GgaAffx.151.1.S1_s_at   | CD79b molecule, immunoglobulin-associated beta                                            | 9.962  |
| Immunity/defense   | Gga.4110.11.S1_x_at     | immunoglobulin lambda-like polypeptide 1                                                  | 9.867  |
| Immunity/defense   | GgaAffx.11201.1.S1_s_at | toll-like receptor 6                                                                      | 9.819  |



|                  |                         |                                                                                          |       |
|------------------|-------------------------|------------------------------------------------------------------------------------------|-------|
| Immunity/defense | Gga.3145.1.S1_x_at      | similar to Moesin (Membrane-organizing extension spike protein)                          | 9.804 |
| Immunity/defense | Gga.1311.5.S1_s_at      | Similar to T-cell receptor V beta chain                                                  | 9.765 |
| Immunity/defense | GgaAffx.10617.2.S1_s_at | toll-like receptor 7                                                                     | 9.749 |
| Immunity/defense | GgaAffx.5458.1.S1_at    | cytotoxic T-lymphocyte-associated protein 4                                              | 9.664 |
| Immunity/defense | Gga.6032.1.S1_at        | dedicator of cytokinesis 8                                                               | 9.560 |
| Immunity/defense | GgaAffx.25386.1.S1_at   | dedicator of cytokinesis 2                                                               | 9.265 |
| Immunity/defense | GgaAffx.21915.1.S1_at   | interferon-induced protein with tetratricopeptide repeats 5                              | 9.081 |
| Immunity/defense | GgaAffx.2421.1.S1_s_at  | T-cell immunoglobulin and mucin domain containing 4                                      | 9.060 |
| Immunity/defense | Gga.723.1.S1_a_at       | CD28 molecule                                                                            | 9.052 |
| Immunity/defense | Gga.4491.1.S1_at        | Lymphocyte-specific protein 1                                                            | 9.021 |
| Immunity/defense | Gga.21.1.S1_a_at        | interleukin 2 receptor, gamma (severe combined immunodeficiency)                         | 8.796 |
| Immunity/defense | Gga.17647.1.S1_at       | neutrophil cytosolic factor 2 (65kDa, chronic granulomatous disease, autosomal 2)        | 8.778 |
| Immunity/defense | Gga.690.1.S1_at         | lymphocyte antigen 86                                                                    | 8.760 |
| Immunity/defense | GgaAffx.12658.1.S1_at   | neutrophil cytosolic factor 4, 40kDa                                                     | 8.655 |
| Immunity/defense | GgaAffx.26062.1.S1_s_at | immunoglobulin-like receptor CHIR-B3 /// similar to immunoglobulin-like receptor CHIR-B3 | 8.641 |
| Immunity/defense | GgaAffx.12842.1.S1_s_at | immunoresponsive 1 homolog (mouse)                                                       | 8.616 |
| Immunity/defense | Gga.445.1.S1_at         | similar to T cell receptor alpha                                                         | 8.522 |
| Immunity/defense | Gga.445.2.S1_a_at       | similar to T cell receptor alpha                                                         | 8.396 |
| Immunity/defense | Gga.9675.1.S1_at        | platelet derived growth factor D                                                         | 8.338 |
| Immunity/defense | Gga.3145.3.S1_a_at      | similar to Moesin (Membrane-organizing extension spike protein)                          | 8.166 |
| Immunity/defense | Gga.236.1.S1_at         | lymphocyte cytosolic protein 2 (SH2 domain containing leukocyte protein of 76kDa)        | 7.935 |
| Immunity/defense | Gga.19049.1.S1_at       | interleukin 18 (interferon-gamma-inducing factor)                                        | 7.852 |
| Immunity/defense | GgaAffx.25386.2.S1_s_at | dedicator of cytokinesis 2                                                               | 7.785 |
| Immunity/defense | Gga.3366.1.S1_at        | interleukin 20 receptor, alpha                                                           | 7.766 |
| Immunity/defense | Gga.11522.1.S1_x_at     | similar to immunoglobulin-like receptor CHIR-AB1                                         | 7.748 |
| Immunity/defense | Gga.4110.4.S1_a_at      | immunoglobulin lambda-like polypeptide 1                                                 | 7.729 |
| Immunity/defense | GgaAffx.9789.1.S1_at    | T cell receptor associated transmembrane adaptor 1                                       | 7.620 |
| Immunity/defense | Gga.217.1.S1_x_at       | MHC class II antigen B-F minor heavy chain                                               | 7.599 |
| Immunity/defense | Gga.4110.12.S1_a_at     | immunoglobulin lambda-like polypeptide 1                                                 | 7.546 |
| Immunity/defense | Gga.14571.1.S1_s_at     | Hermansky-Pudlak syndrome 5                                                              | 7.475 |
| Immunity/defense | Gga.3145.2.S1_a_at      | similar to Moesin (Membrane-organizing extension spike protein)                          | 7.466 |
| Immunity/defense | Gga.11522.1.S1_at       | similar to immunoglobulin-like receptor CHIR-AB1                                         | 7.247 |
| Immunity/defense | GgaAffx.10876.2.S1_s_at | lymphocyte cytosolic protein 1 (L-plastin)                                               | 7.125 |
| Immunity/defense | GgaAffx.24185.1.S1_at   | interleukin 7 receptor                                                                   | 7.054 |
| Immunity/defense | Gga.1220.1.A1_at        | pre-B lymphocyte gene 3                                                                  | 6.815 |
| Immunity/defense | Gga.6332.1.S1_at        | similar to complement regulatory soluble protein                                         | 6.733 |
| Immunity/defense | Gga.1311.3.S1_at        | similar to T-cell receptor beta                                                          | 6.695 |
| Immunity/defense | GgaAffx.11727.1.S1_at   | lymphocyte cytosolic protein 1 (L-plastin)                                               | 6.591 |
| Immunity/defense | Gga.3380.1.S1_at        | T cell receptor alpha locus                                                              | 6.418 |
| Immunity/defense | Gga.13336.2.S1_x_at     | MHC class II antigen B-F minor heavy chain                                               | 6.280 |
| Immunity/defense | GgaAffx.12851.1.S1_s_at | complement component 3a receptor 1                                                       | 6.058 |
| Immunity/defense | Gga.542.1.S1_at         | lymphotactin                                                                             | 6.045 |
| Immunity/defense | GgaAffx.21398.1.S1_at   | dedicator of cytokinesis 10                                                              | 5.998 |
| Immunity/defense | Gga.4491.1.S1_s_at      | Lymphocyte-specific protein 1                                                            | 5.811 |
| Immunity/defense | GgaAffx.24298.1.S1_s_at | interleukin 20 receptor, alpha                                                           | 5.807 |
| Immunity/defense | Gga.4964.5.S1_a_at      | similar to T cell receptor gamma /// similar to T-cell receptor gamma Vg3-Jg3            | 5.646 |
| Immunity/defense | Gga.7064.1.S1_at        | immunoglobulin superfamily, member 1                                                     | 5.593 |
| Immunity/defense | GgaAffx.8515.1.S1_at    | interleukin 7 receptor                                                                   | 5.554 |
| Immunity/defense | Gga.4964.17.S1_x_at     | similar to T-cell receptor gamma Vg3-Jg3                                                 | 5.493 |
| Immunity/defense | Gga.4964.3.S1_x_at      | similar to T-cell receptor gamma Vg3-Jg3                                                 | 5.489 |
| Immunity/defense | Gga.4964.11.S1_a_at     | similar to T-cell receptor gamma V2.6a /// similar to T-cell receptor gamma Vg3-Jg3      | 5.488 |
| Immunity/defense | Gga.4964.2.S1_a_at      | similar to T cell receptor gamma /// similar to T-cell receptor gamma Vg3-Jg3            | 5.468 |
| Immunity/defense | Gga.11252.1.S1_at       | chemokine (C-C motif) ligand 19                                                          | 5.454 |
| Immunity/defense | GgaAffx.23145.3.S1_s_at | dedicator of cytokinesis 8                                                               | 5.299 |
| Immunity/defense | Gga.16655.1.S1_at       | histocompatibility (minor) HA-1                                                          | 5.279 |
| Immunity/defense | Gga.4964.54.A1_x_at     | Similar to T-cell receptor gamma chain Vg3-Jg3                                           | 5.271 |
| Immunity/defense | Gga.296.1.S1_at         | chemokine (C-C motif) ligand 1                                                           | 5.250 |
| Immunity/defense | Gga.178.1.S1_s_at       | guanylate binding protein                                                                | 5.180 |
| Immunity/defense | Gga.4964.22.S1_x_at     | Similar to T-cell receptor gamma chain Vg1-Jg2                                           | 5.162 |
| Immunity/defense | GgaAffx.12157.1.S1_at   | similar to immunoglobulin-like receptor CHIR-B2 precursor                                | 5.131 |
| Immunity/defense | Gga.65.1.S1_a_at        | similar to T-cell receptor gamma Vg3-Jg3                                                 | 5.120 |
| Immunity/defense | Gga.16589.1.S1_at       | Lymphocyte-specific protein 1                                                            | 5.102 |
| Immunity/defense | GgaAffx.11648.1.S1_at   | B-cell CLL/lymphoma 6 (zinc finger protein 51)                                           | 5.042 |
| Immunity/defense | Gga.4964.1.S2_at        | similar to T cell receptor gamma /// similar to T-cell receptor gamma Vg3-Jg3            | 5.031 |

|                       |                         |                                                                                             |       |
|-----------------------|-------------------------|---------------------------------------------------------------------------------------------|-------|
| Immunity/defense      | Gga.19.1.S1_at          | interleukin 1, beta                                                                         | 5.023 |
| Immunity/defense      | GgaAffx.1625.1.S1_s_at  | complement factor H                                                                         | 4.910 |
| Immunity/defense      | Gga.4964.1.S1_x_at      | similar to T-cell receptor gamma Vg3-Jg3                                                    | 4.909 |
| Immunity/defense      | GgaAffx.7251.1.S1_at    | chemokine (C-C motif) receptor 6                                                            | 4.853 |
| Immunity/defense      | GgaAffx.5454.1.S1_at    | inducible T-cell co-stimulator                                                              | 4.850 |
| Immunity/defense      | Gga.6529.1.S1_at        | Fc fragment of IgE, high affinity I, receptor for; gamma polypeptide                        | 4.849 |
| Immunity/defense      | GgaAffx.20498.1.S1_s_at | monocyte to macrophage differentiation-associated                                           | 4.758 |
| Immunity/defense      | Gga.4964.4.S1_x_at      | similar to T cell receptor gamma /// similar to T-cell receptor gamma chain Vg1-Jg2         | 4.613 |
| Immunity/defense      | Gga.4414.1.S1_s_at      | CD74 molecule, major histocompatibility complex, class II invariant chain                   | 4.574 |
| Immunity/defense      | GgaAffx.26385.1.S1_s_at | dedicator of cytokinesis 10                                                                 | 4.569 |
| Immunity/defense      | Gga.18469.1.S1_s_at     | dedicator of cytokinesis 8                                                                  | 4.459 |
| Immunity/defense      | Gga.276.1.S1_at         | early B-cell factor 1                                                                       | 4.410 |
| Immunity/defense      | Gga.65.1.S1_x_at        | similar to T-cell receptor gamma Vg3-Jg3                                                    | 4.396 |
| Immunity/defense      | Gga.6492.1.S1_at        | similar to chemokine CXCL13/BCA-1                                                           | 4.390 |
| Immunity/defense      | Gga.3027.1.S1_at        | CD40 ligand (TNF superfamily, member 5, hyper-IgM syndrome)                                 | 4.359 |
| Immunity/defense      | Gga.4964.11.S1_x_at     | similar to T-cell receptor gamma V2.6a /// similar to T-cell receptor gamma Vg3-Jg3         | 4.265 |
| Immunity/defense      | Gga.2734.1.S2_at        | activated leukocyte cell adhesion molecule                                                  | 4.249 |
| Immunity/defense      | Gga.15811.2.S1_at       | cytokine-like nuclear factor n-pac                                                          | 4.236 |
| Immunity/defense      | Gga.4964.53.S1_x_at     | similar to T-cell receptor gamma Vg3-Jg3                                                    | 4.206 |
| Immunity/defense      | Gga.4964.54.S1_x_at     | similar to T-cell receptor gamma chain Vg3-Jg3 /// similar to T-cell receptor gamma Vg3-Jg3 | 4.099 |
| Immunity/defense      | GgaAffx.7943.1.S1_s_at  | neutrophil cytosolic factor 4, 40kDa                                                        | 4.086 |
| Immunity/defense      | Gga.4964.20.S1_x_at     | similar to T-cell receptor gamma Vg3-Jg3 /// similar to T-cell receptor gamma chain Vg3-Jg1 | 4.051 |
| Immunity/defense      | Gga.9563.1.S1_at        | chemokine (C-C motif) ligand 4 /// chemokine (C-C motif) ligand 5                           | 4.025 |
| Immunity/defense      | GgaAffx.7589.1.S1_at    | chemokine (C-X3-C motif) receptor 1                                                         | 4.018 |
| Immunity/defense      | Gga.12516.1.S1_s_at     | interleukin 20 receptor, alpha                                                              | 3.896 |
| Immunity/defense      | Gga.4964.25.S1_x_at     | similar to T-cell receptor gamma chain Vg3-Jg3 /// similar to T-cell receptor gamma Vg3-Jg3 | 3.794 |
| Immunity/defense      | Gga.13336.3.S1_a_at     | MHC class II antigen B-F minor heavy chain /// MHC class II beta chain                      | 3.775 |
| Immunity/defense      | Gga.575.1.S1_at         | CD8a molecule                                                                               | 3.768 |
| Immunity/defense      | Gga.4185.1.S2_at        | Interferon (alpha, beta and omega) receptor 1                                               | 3.730 |
| Immunity/defense      | Gga.2510.1.S1_at        | complement component 3                                                                      | 3.701 |
| Immunity/defense      | Gga.13336.5.S1_x_at     | MHC class II antigen B-F minor heavy chain /// MHC class II beta chain                      | 3.682 |
| Immunity/defense      | Gga.10606.1.S1_at       | suppressor of cytokine signaling 1                                                          | 3.610 |
| Immunity/defense      | Gga.13336.3.S1_x_at     | MHC class II antigen B-F minor heavy chain /// MHC class II beta chain                      | 3.600 |
| Immunity/defense      | GgaAffx.8901.1.S1_at    | lymphoid-restricted membrane protein                                                        | 3.578 |
| Immunity/defense      | Gga.16267.1.S1_s_at     | similar to MHC Rfp-Y class I alpha chain /// similar to MHC Rfp-Y class I alpha chain       | 3.476 |
| Immunity/defense      | Gga.4491.1.A1_at        | Lymphocyte-specific protein 1                                                               | 3.454 |
| Immunity/defense      | Gga.1328.2.A1_at        | Beta-2-microglobulin                                                                        | 3.439 |
| Immunity/defense      | Gga.4995.1.A1_at        | Similar to T-cell receptor gamma chain Vg2-Jg3                                              | 3.401 |
| Immunity/defense      | GgaAffx.11658.1.S1_s_at | neutrophil cytosolic factor 1                                                               | 3.382 |
| Immunity/defense      | Gga.4964.6.S1_x_at      | similar to T cell receptor gamma /// similar to T-cell receptor gamma Vg3-Jg3               | 3.380 |
| Immunity/defense      | Gga.2529.1.S1_a_at      | interleukin 1 receptor-like 1                                                               | 3.313 |
| Immunity/defense      | Gga.7100.1.S1_at        | similar to macrophage inflammatory protein-2                                                | 3.199 |
| Immunity/defense      | Gga.15027.1.S1_at       | Signaling lymphocytic activation molecule family member 1                                   | 3.187 |
| Immunity/defense      | Gga.916.1.S1_at         | interferon, gamma                                                                           | 3.104 |
| Immunity/defense      | Gga.4973.3.S1_x_at      | MHC class I antigen B-F minor heavy chain                                                   | 3.085 |
| Immunity/defense      | GgaAffx.21845.2.S1_s_at | CD74 molecule, major histocompatibility complex, class II invariant chain                   | 3.070 |
| Immunity/defense      | GgaAffx.12703.1.S1_at   | similar to Toll-like receptor 21                                                            | 3.063 |
| Immunity/defense      | GgaAffx.12160.1.S1_s_at | cytokine receptor-like factor 3                                                             | 3.041 |
| Immunity/defense      | Gga.7057.1.S1_at        | caspase recruitment domain family, member 11                                                | 3.036 |
| Immunity/defense      | GgaAffx.26702.1.S1_s_at | similar to dedicator of cytokinesis 11                                                      | 3.026 |
| Immunity/defense      | Gga.9732.1.S1_at        | inter-alpha (globulin) inhibitor H5                                                         | 3.022 |
| Immunity/defense      | Gga.1045.1.S1_at        | similar to dedicator of cytokinesis 11                                                      | 3.002 |
| Immunity/defense      | Gga.8178.1.S1_at        | interferon stimulated exonuclease gene 20kDa-like 2                                         | 0.477 |
| Immunity/defense      | Gga.5922.2.S1_a_at      | platelet-activating factor acetylhydrolase 2, 40kDa                                         | 0.449 |
| Immunity/defense      | GgaAffx.26288.1.S1_s_at | complement component 1, r subcomponent                                                      | 0.447 |
| Immunity/defense      | Gga.11984.1.S1_at       | dedicator of cytokinesis 5                                                                  | 0.399 |
| Immunity/defense      | GgaAffx.20791.1.S1_at   | interleukin 28B (interferon, lambda 3)                                                      | 0.347 |
| Mitochondrial protein | Gga.5224.1.S1_at        | Carbonic anhydrase VB, mitochondrial                                                        | 3.017 |
| Mitochondrial protein | GgaAffx.12907.1.S1_at   | mitochondrial ribosomal protein L18                                                         | 0.495 |
| Mitochondrial protein | GgaAffx.10169.1.S1_at   | leucyl-tRNA synthetase 2, mitochondrial                                                     | 0.493 |

|                       |                         |                                                                                               |        |
|-----------------------|-------------------------|-----------------------------------------------------------------------------------------------|--------|
| Mitochondrial protein | GgaAffx.23789.1.S1_at   | peptidase (mitochondrial processing) alpha                                                    | 0.489  |
| Mitochondrial protein | Gga.6085.3.S1_a_at      | mitochondrial ribosomal protein S6                                                            | 0.444  |
| Mitochondrial protein | GgaAffx.1241.1.S1_at    | mitochondrial ribosomal protein S31                                                           | 0.444  |
| Mitochondrial protein | GgaAffx.2318.1.S1_at    | similar to Translocase of outer mitochondrial membrane 20 homolog (yeast)                     | 0.443  |
| Mitochondrial protein | GgaAffx.194.1.S1_at     | mitochondrial ribosomal protein L3                                                            | 0.411  |
| Mitochondrial protein | GgaAffx.9649.1.S1_at    | solute carrier family 25 (mitochondrial carrier, brain), member 14                            | 0.405  |
| Mitochondrial protein | GgaAffx.9403.1.S1_s_at  | mitochondrial translational initiation factor 3                                               | 0.391  |
| Mitochondrial protein | Gga.4006.2.S1_a_at      | mitochondrial ribosomal protein L39                                                           | 0.380  |
| Mitochondrial protein | GgaAffx.23494.1.S1_s_at | ATP synthase, H <sup>+</sup> transporting, mitochondrial F0 complex, subunit F2               | 0.319  |
| Protein degradation   | Gga.1111.1.S1_a_at      | ubiquitin specific peptidase 18                                                               | 3.656  |
| Protein degradation   | GgaAffx.26411.1.S1_s_at | proteasome (prosome, macropain) 26S subunit, non-ATPase, 6                                    | 0.487  |
| Protein degradation   | GgaAffx.25545.1.S1_at   | proteasome (prosome, macropain) subunit, beta type, 2                                         | 0.467  |
| Protein degradation   | GgaAffx.5008.1.S1_at    | ubiquitin specific peptidase 34                                                               | 0.413  |
| Protein degradation   | GgaAffx.7526.1.S1_at    | similar to cullin 4A                                                                          | 0.411  |
| Protein degradation   | GgaAffx.26602.1.S1_at   | proteasome (prosome, macropain) 26S subunit, ATPase, 6                                        | 0.400  |
| Protein degradation   | Gga.4152.1.S1_s_at      | proteasome (prosome, macropain) subunit, alpha type, 1                                        | 0.382  |
| Protein degradation   | GgaAffx.9792.1.S1_at    | cullin-associated and neddylation-dissociated 2 (putative)                                    | 0.373  |
| Protein degradation   | GgaAffx.4984.2.S1_s_at  | proteasome (prosome, macropain) 26S subunit, non-ATPase, 1                                    | 0.274  |
| Protein modification  | Gga.6553.1.S1_at        | cathepsin G                                                                                   | 12.681 |
| Protein modification  | Gga.5393.1.S1_at        | similar to serine protease                                                                    | 12.146 |
| Protein modification  | Gga.3867.1.S1_at        | prion protein (p27-30) (Creutzfeldt-Jakob disease)                                            | 10.834 |
| Protein modification  | Gga.18980.1.S1_at       | NUAK family, SNF1-like kinase, 1                                                              | 10.073 |
| Protein modification  | Gga.7788.1.S1_at        | similar to phospholipase A2 inhibitor gamma subunit B                                         | 9.230  |
| Protein modification  | GgaAffx.5597.1.S1_at    | mitogen-activated protein kinase kinase kinase 4                                              | 9.224  |
| Protein modification  | Gga.11824.1.S1_at       | Cystatin F (leukocystatin)                                                                    | 8.876  |
| Protein modification  | Gga.606.1.S1_at         | v-kit Hardy-Zuckerman 4 feline sarcoma viral oncogene homolog                                 | 8.172  |
| Protein modification  | GgaAffx.20295.1.S1_at   | NUAK family, SNF1-like kinase, 1                                                              | 8.084  |
| Protein modification  | Gga.415.1.S1_at         | serpin peptidase inhibitor, clade B (ovalbumin), member 10                                    | 8.026  |
| Protein modification  | Gga.1193.1.S2_at        | protein tyrosine phosphatase, receptor type, C                                                | 7.156  |
| Protein modification  | Gga.1193.1.S1_at        | protein tyrosine phosphatase, receptor type, C                                                | 6.665  |
| Protein modification  | Gga.1148.1.S1_at        | ST6 beta-galactosamide alpha-2,6-sialyltransferase 1                                          | 6.428  |
| Protein modification  | Gga.11016.1.S1_at       | B locus M alpha chain 1                                                                       | 6.345  |
| Protein modification  | Gga.16596.1.S1_at       | phosphotyrosine interaction domain containing 1                                               | 6.342  |
| Protein modification  | GgaAffx.11885.1.S1_s_at | Bruton agammaglobulinemia tyrosine kinase                                                     | 6.278  |
| Protein modification  | Gga.5273.1.S1_at        | Adrenergic, beta, receptor kinase 2                                                           | 6.103  |
| Protein modification  | Gga.1148.1.S2_at        | ST6 beta-galactosamide alpha-2,6-sialyltransferase 1                                          | 5.965  |
| Protein modification  | Gga.11456.1.S1_at       | cystatin A (stefin A)                                                                         | 5.810  |
| Protein modification  | Gga.3379.2.S1_at        | SH3-domain kinase binding protein 1                                                           | 5.403  |
| Protein modification  | Gga.4105.2.S1_a_at      | serpin peptidase inhibitor, clade E (nexin, plasminogen activator inhibitor type 1), member 2 | 5.271  |
| Protein modification  | GgaAffx.7823.1.S1_s_at  | serine/threonine kinase 17a                                                                   | 5.240  |
| Protein modification  | Gga.12533.1.S1_at       | protein tyrosine phosphatase-like A domain containing 2                                       | 5.231  |
| Protein modification  | Gga.6964.1.S1_at        | protein kinase C, beta                                                                        | 5.112  |
| Protein modification  | GgaAffx.8960.1.S1_at    | TXK tyrosine kinase                                                                           | 5.110  |
| Protein modification  | GgaAffx.26700.1.S1_s_at | protein kinase C, beta                                                                        | 4.995  |
| Protein modification  | GgaAffx.8628.1.S1_at    | granzyme K (granzyme 3; tryptase II)                                                          | 4.983  |
| Protein modification  | GgaAffx.12547.1.S1_at   | ST3 beta-galactoside alpha-2,3-sialyltransferase 2                                            | 4.680  |
| Protein modification  | Gga.1035.1.S1_at        | transglutaminase 2 (C polypeptide, protein-glutamine-gamma-glutamyltransferase)               | 4.648  |
| Protein modification  | GgaAffx.968.3.S1_s_at   | zeta-chain (TCR) associated protein kinase 70kDa                                              | 4.625  |
| Protein modification  | Gga.7157.1.S1_at        | protein kinase C, beta                                                                        | 4.554  |
| Protein modification  | GgaAffx.12557.1.S1_s_at | tyrosylprotein sulfotransferase 2                                                             | 4.469  |
| Protein modification  | Gga.9012.1.S1_at        | serine/threonine kinase 17b                                                                   | 4.276  |
| Protein modification  | Gga.11865.1.S1_at       | similar to Cathepsin L, a                                                                     | 4.073  |
| Protein modification  | GgaAffx.6712.2.S1_s_at  | protein kinase D3                                                                             | 3.941  |
| Protein modification  | Gga.6713.1.S1_at        | granzyme A (granzyme 1, cytotoxic T-lymphocyte-associated serine esterase 3)                  | 3.829  |
| Protein modification  | Gga.7011.1.S1_a_at      | similar to cAMP-dependent protein kinase inhibitor gamma                                      | 3.823  |
| Protein modification  | Gga.8329.1.S1_at        | protein kinase C, eta                                                                         | 3.815  |
| Protein modification  | GgaAffx.11653.1.S1_s_at | serine/threonine kinase 17b                                                                   | 3.802  |
| Protein modification  | Gga.2435.1.S2_at        | Janus kinase 1 (a protein tyrosine kinase)                                                    | 3.532  |
| Protein modification  | Gga.12120.1.S1_at       | protein kinase C and casein kinase substrate in neurons 3                                     | 3.491  |
| Protein modification  | Gga.11468.1.S1_a_at     | peptidylprolyl isomerase C (cyclophilin C)                                                    | 3.474  |
| Protein modification  | Gga.19289.1.S1_at       | Prolylcarboxypeptidase (angiotensinase C)                                                     | 3.378  |
| Protein modification  | GgaAffx.6712.1.S1_at    | protein kinase D3                                                                             | 3.231  |
| Protein modification  | GgaAffx.378.1.S1_at     | protein tyrosine phosphatase, non-receptor type 7                                             | 3.158  |
| Protein modification  | GgaAffx.12579.1.S1_at   | dual specificity phosphatase 10                                                               | 3.107  |
| Protein modification  | GgaAffx.22748.1.S1_at   | mitogen-activated protein kinase kinase kinase 4                                              | 3.033  |
| Protein modification  | GgaAffx.9707.1.S1_s_at  | protein-L-isoaspartate (D-aspartate) O-methyltransferase domain containing 1                  | 3.012  |
| Protein modification  | Gga.536.1.S1_a_at       | 2'-5'-oligoadenylate synthetase-like                                                          | 3.000  |

|                      |                         |                                                                                       |        |
|----------------------|-------------------------|---------------------------------------------------------------------------------------|--------|
| Protein modification | GgaAffx.22730.1.S1_at   | phosphatase and tensin homolog (mutated in multiple advanced cancers 1), pseudogene 1 | 0.499  |
| Protein modification | Gga.19366.1.S1_s_at     | CDC-like kinase 4                                                                     | 0.499  |
| Protein modification | GgaAffx.1012.1.S1_at    | Tousled-like kinase 1                                                                 | 0.476  |
| Protein modification | GgaAffx.25489.1.S1_at   | TBC domain-containing protein kinase-like                                             | 0.469  |
| Protein modification | GgaAffx.10968.1.S1_at   | peptidylprolyl isomerase domain and WD repeat containing 1                            | 0.465  |
| Protein modification | Gga.16991.2.S1_a_at     | Phosphatase and tensin homolog                                                        | 0.462  |
| Protein modification | GgaAffx.6526.1.S1_s_at  | peptidylprolyl isomerase E (cyclophilin E)                                            | 0.455  |
| Protein modification | Gga.9011.2.S1_at        | protein phosphatase 1, regulatory (inhibitor) subunit 12A                             | 0.440  |
| Protein modification | Gga.7118.2.S1_s_at      | protein phosphatase 3 (formerly 2B), catalytic subunit, beta isoform                  | 0.439  |
| Protein modification | GgaAffx.9058.2.S1_s_at  | protein phosphatase 1, regulatory (inhibitor) subunit 8                               | 0.436  |
| Protein modification | GgaAffx.1184.1.S1_at    | mitogen-activated protein kinase kinase kinase 4                                      | 0.433  |
| Protein modification | Gga.5698.1.S1_at        | methyl-CpG binding domain protein 5                                                   | 0.418  |
| Protein modification | Gga.267.1.S1_at         | protein-L-isoaspartate (D-aspartate) O-methyltransferase                              | 0.416  |
| Protein modification | GgaAffx.24899.1.S1_at   | integrin-linked kinase-associated serine/threonine phosphatase 2C                     | 0.407  |
| Protein modification | GgaAffx.23800.1.S1_at   | pitrilysin metalloproteinase 1                                                        | 0.406  |
| Protein modification | Gga.19278.1.S1_s_at     | protein arginine methyltransferase 7                                                  | 0.401  |
| Protein modification | Gga.6118.1.S1_at        | serine/threonine kinase receptor associated protein                                   | 0.399  |
| Protein modification | GgaAffx.2219.3.S1_s_at  | cathepsin Z                                                                           | 0.395  |
| Protein modification | GgaAffx.8894.1.S1_at    | calcium/calmodulin-dependent serine protein kinase (MAGUK family)                     | 0.392  |
| Protein modification | Gga.18973.1.S1_at       | Megakaryocyte-associated tyrosine kinase                                              | 0.387  |
| Protein modification | GgaAffx.25618.1.S1_at   | protein phosphatase 1, regulatory (inhibitor) subunit 1B                              | 0.359  |
| Protein modification | Gga.16586.1.S1_at       | protein phosphatase 1, regulatory (inhibitor) subunit 13B                             | 0.357  |
| Protein modification | Gga.9700.4.S1_a_at      | serine/threonine kinase 38 like                                                       | 0.314  |
| Protein modification | Gga.51.1.S1_at          | ariadne homolog, ubiquitin-conjugating enzyme E2 binding protein, 1 (Drosophila)      | 0.294  |
| Protein modification | GgaAffx.25266.1.S1_at   | protein kinase C, alpha                                                               | 0.282  |
| Signal transduction  | Gga.8030.1.S1_at        | tissue factor pathway inhibitor 2                                                     | 19.735 |
| Signal transduction  | Gga.3259.1.S1_at        | angiopoietin 2                                                                        | 15.883 |
| Signal transduction  | GgaAffx.13210.1.S1_at   | Src-like-adaptor                                                                      | 15.548 |
| Signal transduction  | GgaAffx.12646.1.S1_at   | spleen tyrosine kinase                                                                | 15.136 |
| Signal transduction  | Gga.4070.1.S1_at        | Colony stimulating factor 1 receptor                                                  | 13.456 |
| Signal transduction  | Gga.10829.1.S1_s_at     | endothelin receptor type B                                                            | 13.023 |
| Signal transduction  | Gga.15362.1.S1_at       | regulator of G-protein signalling 18                                                  | 12.172 |
| Signal transduction  | Gga.5008.1.S1_at        | cyclin-dependent kinase inhibitor 2A (melanoma, p16, inhibits CDK4)                   | 12.162 |
| Signal transduction  | Gga.7838.1.S1_at        | colony stimulating factor 2 receptor, alpha, low-affinity (granulocyte-macrophage)    | 11.274 |
| Signal transduction  | Gga.1287.1.S1_at        | RAS guanyl releasing protein 3 (calcium and DAG-regulated)                            | 11.087 |
| Signal transduction  | GgaAffx.11475.1.S1_s_at | Ras association (RalGDS/AF-6) domain family member 2                                  | 10.759 |
| Signal transduction  | GgaAffx.13138.1.S1_at   | tumor necrosis factor (ligand) superfamily, member 13b                                | 10.559 |
| Signal transduction  | Gga.1348.1.S1_at        | Rho GTPase activating protein 24                                                      | 10.525 |
| Signal transduction  | Gga.9882.1.S1_at        | colony stimulating factor 2 receptor, alpha, low-affinity (granulocyte-macrophage)    | 10.007 |
| Signal transduction  | Gga.8508.1.S2_s_at      | Src-like-adaptor                                                                      | 9.750  |
| Signal transduction  | Gga.3306.1.S1_s_at      | endothelin receptor type B                                                            | 9.680  |
| Signal transduction  | Gga.10418.1.S1_at       | Guanine nucleotide binding protein (G protein), gamma 10                              | 9.372  |
| Signal transduction  | Gga.18933.1.S1_s_at     | Ras association (RalGDS/AF-6) domain family 5                                         | 9.355  |
| Signal transduction  | GgaAffx.13005.1.S1_at   | purinergic receptor P2Y, G-protein coupled, 8                                         | 9.317  |
| Signal transduction  | GgaAffx.7881.1.S1_s_at  | Rho GTPase activating protein 15                                                      | 9.272  |
| Signal transduction  | Gga.1585.1.S2_at        | stathmin-like 2                                                                       | 9.250  |
| Signal transduction  | Gga.8164.1.S1_a_at      | similar to Ras-related protein Rab-10                                                 | 8.807  |
| Signal transduction  | GgaAffx.11864.1.S1_at   | G protein-coupled receptor 174                                                        | 8.430  |
| Signal transduction  | Gga.8789.1.S1_at        | phosphoinositide-3-kinase, catalytic, delta polypeptide                               | 8.124  |
| Signal transduction  | Gga.18945.1.S1_at       | phosphatidylinositol-3,4,5-trisphosphate-dependent Rac exchange factor 1              | 8.070  |
| Signal transduction  | Gga.9880.1.S1_at        | Purinergic receptor P2Y, G-protein coupled, 13                                        | 8.046  |
| Signal transduction  | Gga.7334.1.S1_at        | amyloid beta (A4) precursor protein-binding, family B, member 1 interacting protein   | 7.585  |
| Signal transduction  | GgaAffx.21779.1.S1_s_at | stathmin-like 2                                                                       | 7.539  |
| Signal transduction  | Gga.10018.1.S1_at       | Ras and Rab interactor 3                                                              | 7.497  |
| Signal transduction  | GgaAffx.12475.1.S1_at   | TNF receptor-associated factor 5                                                      | 7.471  |
| Signal transduction  | GgaAffx.12029.1.S1_at   | tumor necrosis factor receptor superfamily, member 1B                                 | 7.459  |
| Signal transduction  | GgaAffx.12969.1.S1_at   | phosphoinositide-3-kinase, regulatory subunit 5, p101                                 | 7.271  |
| Signal transduction  | GgaAffx.11713.1.S1_s_at | Rho guanine nucleotide exchange factor (GEF) 3                                        | 7.242  |
| Signal transduction  | Gga.2696.1.S1_at        | similar to selectin ligand interactor cytoplasmic-1                                   | 7.207  |
| Signal transduction  | GgaAffx.12948.1.S1_s_at | RAS guanyl releasing protein 3 (calcium and DAG-regulated)                            | 7.062  |
| Signal transduction  | GgaAffx.13096.1.S1_at   | Ras association (RalGDS/AF-6) domain family 5                                         | 7.014  |
| Signal transduction  | Gga.4359.1.S1_s_at      | tumor necrosis factor (ligand) superfamily, member 13b                                | 6.985  |
| Signal transduction  | GgaAffx.26579.1.S1_s_at | Colony stimulating factor 1 receptor                                                  | 6.896  |
| Signal transduction  | Gga.539.1.S1_at         | CD247 molecule                                                                        | 6.880  |
| Signal transduction  | Gga.8094.1.S1_a_at      | Rho GDP dissociation inhibitor (GDI) beta                                             | 6.646  |



|                                  |                         |                                                                                           |        |
|----------------------------------|-------------------------|-------------------------------------------------------------------------------------------|--------|
| Signal transduction              | Gga.6239.1.S1_at        | regulator of G-protein signalling 1                                                       | 6.607  |
| Signal transduction              | Gga.11560.2.S1_a_at     | phosphoinositide-3-kinase adaptor protein 1                                               | 6.604  |
| Signal transduction              | Gga.6387.1.S1_at        | ras-related C3 botulinum toxin substrate 2 (rho family, small GTP binding protein Rac2)   | 6.596  |
| Signal transduction              | GgaAffx.6562.1.S1_at    | G protein-coupled receptor 171                                                            | 6.591  |
| Signal transduction              | GgaAffx.10679.1.S1_at   | colony stimulating factor 2 receptor, alpha, low-affinity (granulocyte-macrophage)        | 6.521  |
| Signal transduction              | Gga.3154.1.S1_at        | ras homolog gene family, member Q                                                         | 6.330  |
| Signal transduction              | Gga.5148.1.S2_s_at      | tumor necrosis factor receptor superfamily, member 1B                                     | 6.305  |
| Signal transduction              | GgaAffx.6562.1.A1_at    | G protein-coupled receptor 171                                                            | 6.256  |
| Signal transduction              | GgaAffx.11426.1.S1_at   | tumor necrosis factor receptor superfamily, member 18                                     | 6.131  |
| Signal transduction              | Gga.5148.1.S1_at        | tumor necrosis factor receptor superfamily, member 1B                                     | 5.991  |
| Signal transduction              | Gga.8823.1.S1_s_at      | CKLF-like MARVEL transmembrane domain containing 7                                        | 5.990  |
| Signal transduction              | GgaAffx.3477.1.S1_at    | G protein-coupled receptor 35                                                             | 5.986  |
| Signal transduction              | GgaAffx.12575.1.S1_s_at | ankyrin repeat and SOCS box-containing 9                                                  | 5.942  |
| Signal transduction              | Gga.1027.1.S1_at        | similar to Rho-GTPase-activating protein 6 (Rho-type GTPase-activating protein RhoGAPX-1) | 5.775  |
| Signal transduction              | Gga.998.2.S1_a_at       | CD3d molecule, delta (CD3-TCR complex)                                                    | 5.712  |
| Signal transduction              | Gga.11395.1.S1_at       | G protein-coupled receptor 34                                                             | 5.576  |
| Signal transduction              | GgaAffx.24611.2.S1_s_at | similar to histamine H3 receptor H3S                                                      | 5.551  |
| Signal transduction              | GgaAffx.4780.1.S1_at    | signal transducer and activator of transcription 1, 91kDa                                 | 5.283  |
| Signal transduction              | GgaAffx.12684.1.S1_s_at | Rho GTPase activating protein 25                                                          | 5.257  |
| Signal transduction              | Gga.11516.1.S1_at       | Pyrimidinergic receptor P2Y, G-protein coupled, 6                                         | 5.235  |
| Signal transduction              | Gga.4359.1.S2_s_at      | tumor necrosis factor (ligand) superfamily, member 13b                                    | 5.162  |
| Signal transduction              | GgaAffx.12918.1.S1_s_at | cytohesin 4                                                                               | 5.126  |
| Signal transduction              | Gga.4970.1.S1_at        | CD3e molecule, epsilon (CD3-TCR complex)                                                  | 4.995  |
| Signal transduction              | Gga.6098.1.S1_at        | Similar to contactin associated protein                                                   | 4.976  |
| Signal transduction              | GgaAffx.11771.1.S1_at   | Rac/Cdc42 guanine nucleotide exchange factor (GEF) 6                                      | 4.796  |
| Signal transduction              | Gga.352.1.S1_at         | regulator of G-protein signaling 20                                                       | 4.700  |
| Signal transduction              | Gga.10030.1.S1_s_at     | phosphoinositide-3-kinase, regulatory subunit 5, p101                                     | 4.610  |
| Signal transduction              | Gga.986.1.S1_s_at       | tumor necrosis factor receptor superfamily, member 18                                     | 4.476  |
| Signal transduction              | GgaAffx.8756.1.S1_at    | similar to FKSG15                                                                         | 4.405  |
| Signal transduction              | GgaAffx.10807.1.S1_at   | Epstein-Barr virus induced gene 2 (lymphocyte-specific G protein-coupled receptor)        | 4.287  |
| Signal transduction              | Gga.1092.1.S1_s_at      | G protein-coupled receptor 174                                                            | 4.282  |
| Signal transduction              | Gga.3624.1.S1_at        | phosphodiesterase 3B, cGMP-inhibited                                                      | 3.977  |
| Signal transduction              | GgaAffx.12014.1.S1_s_at | amyloid beta (A4) precursor protein-binding, family B, member 1 interacting protein       | 3.879  |
| Signal transduction              | Gga.4113.1.S1_at        | ras homolog gene family, member F (in filopodia)                                          | 3.743  |
| Signal transduction              | GgaAffx.11590.1.S1_s_at | cytohesin 1                                                                               | 3.702  |
| Signal transduction              | Gga.5148.1.S1_s_at      | tumor necrosis factor receptor superfamily, member 1B                                     | 3.601  |
| Signal transduction              | Gga.8752.1.S1_s_at      | sorting nexin 10                                                                          | 3.594  |
| Signal transduction              | GgaAffx.3442.2.S1_s_at  | Rho guanine nucleotide exchange factor (GEF) 3                                            | 3.579  |
| Signal transduction              | GgaAffx.9008.1.S1_s_at  | parvin, gamma                                                                             | 3.410  |
| Signal transduction              | Gga.17410.1.S1_at       | Glucocorticoid induced transcript 1                                                       | 3.362  |
| Signal transduction              | Gga.9999.1.S1_at        | RAS p21 protein activator 3                                                               | 3.341  |
| Signal transduction              | GgaAffx.11861.1.S1_at   | RasGEF domain family, member 1A                                                           | 3.313  |
| Signal transduction              | Gga.19099.2.S1_a_at     | secreted protein, acidic, cysteine-rich (osteonectin)                                     | 3.312  |
| Signal transduction              | GgaAffx.9971.2.S1_s_at  | G protein-coupled receptor kinase 4                                                       | 3.309  |
| Signal transduction              | Gga.10465.1.S1_s_at     | G protein-coupled receptor 65                                                             | 3.259  |
| Signal transduction              | Gga.12335.2.S1_s_at     | cytohesin 4                                                                               | 3.246  |
| Signal transduction              | Gga.12662.1.S1_at       | signal transducer and activator of transcription 1, 91kDa                                 | 3.235  |
| Signal transduction              | Gga.3175.1.S1_at        | Phosphoinositide-3-kinase, regulatory subunit 1 (p85 alpha)                               | 3.223  |
| Signal transduction              | GgaAffx.11756.1.S1_at   | G protein-coupled receptor 137B                                                           | 3.153  |
| Signal transduction              | GgaAffx.1027.1.S1_at    | TNF receptor-associated factor 1                                                          | 3.135  |
| Signal transduction              | GgaAffx.7443.1.S1_at    | signal transducing adaptor family member 1                                                | 3.053  |
| Signal transduction              | GgaAffx.1691.1.A1_at    | regulator of G-protein signalling 5                                                       | 3.029  |
| Signal transduction              | GgaAffx.5618.1.S1_at    | amyloid beta (A4) precursor protein-binding, family B, member 1 interacting protein       | 0.499  |
| Signal transduction              | Gga.7708.1.S1_at        | agrin                                                                                     | 0.497  |
| Signal transduction              | Gga.4589.1.S3_at        | thyroid hormone receptor interactor 12                                                    | 0.496  |
| Signal transduction              | GgaAffx.22041.1.S1_s_at | src kinase associated phosphoprotein 2                                                    | 0.476  |
| Signal transduction              | GgaAffx.25488.1.S1_at   | TNF receptor-associated factor 6                                                          | 0.467  |
| Signal transduction              | Gga.4101.1.S1_s_at      | diacylglycerol kinase, delta 130kDa                                                       | 0.463  |
| Signal transduction              | Gga.10747.1.S1_s_at     | ankyrin 3                                                                                 | 0.461  |
| Signal transduction              | Gga.2166.3.S1_a_at      | hepatocyte growth factor (hepapoietin A; scatter factor)                                  | 0.458  |
| Signal transduction              | GgaAffx.21433.1.S1_s_at | RAS, dexamethasone-induced 1                                                              | 0.457  |
| Signal transduction              | Gga.7797.1.S1_s_at      | Rac GTPase activating protein 1                                                           | 0.427  |
| Signal transduction              | GgaAffx.23134.1.S1_at   | insulin receptor substrate 1                                                              | 0.387  |
| Signal transduction              | Gga.8230.1.S1_at        | discs, large homolog 7 (Drosophila)                                                       | 0.384  |
| Signal transduction              | GgaAffx.25114.2.S1_s_at | lipopolysaccharide-induced TNF factor                                                     | 0.320  |
| Transporter/membrane trafficking | Gga.2680.1.S1_at        | aquaporin 1 (Colton blood group)                                                          | 19.758 |
| Transporter/membrane trafficking | Gga.918.1.S1_at         | potassium large conductance calcium-activated channel, subfamily M, beta member 1         | 11.604 |
| Transporter/membrane trafficking | Gga.9077.1.S1_at        | hydrogen voltage-gated channel 1                                                          | 9.945  |

|                                  |                         |                                                                                   |       |
|----------------------------------|-------------------------|-----------------------------------------------------------------------------------|-------|
| Transporter/membrane trafficking | Gga.11184.1.S1_at       | potassium channel tetramerisation domain containing 12                            | 9.018 |
| Transporter/membrane trafficking | Gga.12076.1.S1_at       | purinergic receptor P2X, ligand-gated ion channel, 5                              | 5.915 |
| Transporter/membrane trafficking | Gga.871.1.S1_at         | solute carrier family 2 (facilitated glucose transporter), member 3               | 5.714 |
| Transporter/membrane trafficking | Gga.14445.1.S1_s_at     | solute carrier family 1 (high affinity aspartate/glutamate transporter), member 6 | 5.374 |
| Transporter/membrane trafficking | Gga.16544.1.S1_s_at     | chloride intracellular channel 2                                                  | 5.361 |
| Transporter/membrane trafficking | Gga.1235.2.S1_at        | potassium voltage-gated channel, shaker-related subfamily, beta member 2          | 5.274 |
| Transporter/membrane trafficking | Gga.7278.1.S1_at        | Solute carrier family 25, member 29                                               | 4.881 |
| Transporter/membrane trafficking | GgaAffx.10727.2.S1_at   | ATPase, class V, type 10A                                                         | 4.785 |
| Transporter/membrane trafficking | Gga.6246.1.S1_at        | Rab interacting lysosomal protein-like 2                                          | 4.724 |
| Transporter/membrane trafficking | Gga.7430.1.S1_at        | synaptotagmin XI                                                                  | 4.698 |
| Transporter/membrane trafficking | GgaAffx.8046.1.S1_s_at  | solute carrier family 41, member 2                                                | 4.674 |
| Transporter/membrane trafficking | GgaAffx.5539.1.S1_s_at  | solute carrier family 1 (glutamate/neutral amino acid transporter), member 4      | 4.495 |
| Transporter/membrane trafficking | Gga.17590.1.S1_s_at     | chloride intracellular channel 2                                                  | 4.422 |
| Transporter/membrane trafficking | Gga.4594.1.S2_at        | ATPase, Na <sup>+</sup> /K <sup>+</sup> transporting, beta 3 polypeptide          | 4.070 |
| Transporter/membrane trafficking | Gga.4451.1.S1_at        | gelsolin                                                                          | 3.981 |
| Transporter/membrane trafficking | GgaAffx.1584.1.S1_at    | solute carrier family 9 (sodium/hydrogen exchanger), member 9                     | 3.831 |
| Transporter/membrane trafficking | GgaAffx.1584.2.S1_s_at  | solute carrier family 9 (sodium/hydrogen exchanger), member 9                     | 3.608 |
| Transporter/membrane trafficking | Gga.9127.1.S1_at        | ATPase, class V, type 10D                                                         | 3.476 |
| Transporter/membrane trafficking | Gga.9816.1.S1_s_at      | chloride intracellular channel 2                                                  | 3.436 |
| Transporter/membrane trafficking | Gga.1235.1.S1_at        | potassium voltage-gated channel, shaker-related subfamily, beta member 2          | 3.434 |
| Transporter/membrane trafficking | Gga.4594.1.S1_at        | ATPase, Na <sup>+</sup> /K <sup>+</sup> transporting, beta 3 polypeptide          | 3.420 |
| Transporter/membrane trafficking | Gga.6941.1.S1_at        | Similar to guanine nucleotide exchange factor Lbc                                 | 3.374 |
| Transporter/membrane trafficking | Gga.2564.1.S1_s_at      | adaptor-related protein complex 1, sigma 2 subunit                                | 3.276 |
| Transporter/membrane trafficking | GgaAffx.22282.1.S1_at   | solute carrier family 29 (nucleoside transporters), member 1                      | 0.497 |
| Transporter/membrane trafficking | Gga.458.1.S1_s_at       | ATPase, Ca <sup>++</sup> transporting, plasma membrane 4                          | 0.488 |
| Transporter/membrane trafficking | Gga.18339.1.S1_s_at     | nucleoporin 54kDa                                                                 | 0.488 |
| Transporter/membrane trafficking | Gga.5104.1.S1_at        | nucleoporin 35kDa                                                                 | 0.480 |
| Transporter/membrane trafficking | Gga.7586.1.S1_at        | solute carrier family 23 (nucleobase transporters), member 2                      | 0.474 |
| Transporter/membrane trafficking | GgaAffx.1444.1.S1_at    | karyopherin alpha 5 (importin alpha 6)                                            | 0.468 |
| Transporter/membrane trafficking | GgaAffx.22855.1.S1_at   | RAB14, member RAS oncogene family                                                 | 0.467 |
| Transporter/membrane trafficking | Gga.6181.1.S1_at        | potassium channel tetramerisation domain containing 10                            | 0.461 |
| Transporter/membrane trafficking | GgaAffx.26684.1.S1_at   | solute carrier family 16, member 13 (monocarboxylic acid transporter 13)          | 0.451 |
| Transporter/membrane trafficking | GgaAffx.24196.1.S1_s_at | potassium channel tetramerisation domain containing 20                            | 0.448 |
| Transporter/membrane trafficking | GgaAffx.10181.1.S1_at   | syntaxin binding protein 3                                                        | 0.430 |
| Transporter/membrane trafficking | GgaAffx.4428.2.S1_s_at  | vacuolar protein sorting 53 homolog (S. cerevisiae)                               | 0.424 |
| Transporter/membrane trafficking | GgaAffx.6526.7.S1_s_at  | importin 7                                                                        | 0.421 |
| Transporter/membrane trafficking | Gga.12255.1.S1_s_at     | ATPase, H <sup>+</sup> transporting, lysosomal V0 subunit a1                      | 0.413 |
| Transporter/membrane trafficking | Gga.16527.1.S1_at       | solute carrier family 43, member 2                                                | 0.412 |
| Transporter/membrane trafficking | Gga.13215.1.S1_at       | RAB, member RAS oncogene family-like 5                                            | 0.396 |
| Transporter/membrane trafficking | Gga.7931.1.S1_at        | nucleoporin 133kDa                                                                | 0.271 |
