# Supplementary material for: Transcriptome Analysis in Chicken Cecal Epithelia upon Infection by Eimeria tenella In Vivo
Source: PLoS One. 2013 May 30;8(5):e64236. doi: 10.1371/journal.pone.0064236 (PMC3667848; doi:10.1371/journal.pone.0064236)
Supplement: Table S2 — Complete list of regulated genes that could be mapped by gene ontology (GO), including GO terms, p -values, FDR ( q ) values and mappable genes. (XLSX) [file pone.0064236.s004.xlsx]

## Sheet: Up-regulated >3-fold changes
GO_acc	term_type	Term	queryitem	querytotal	bgitem	bgtotal	pvalue	FDR	Probe entries
GO:0002376	P	immune system process	73	486	703	24599	1.7e-28	7.2e-26	// Gga.3027.1.S1_at // GgaAffx.11201.1.S1_s_at // GgaAffx.968.3.S1_s_at // GgaAffx.1068.1.S1_at // Gga.198.1.S1_at // Gga.998.2.S1_a_at // Gga.2510.1.S1_at // GgaAffx.24185.1.S1_at // Gga.11645.2.S1_a_at // Gga.1313.1.S1_s_at // Gga.419.1.A1_at // Gga.4954.2.S1_a_at // Gga.4458.1.S1_at // Gga.1193.1.S1_at // GgaAffx.2373.1.S1_s_at // Gga.6529.1.S1_at // GgaAffx.12646.1.S1_at // GgaAffx.9789.1.S1_…
GO:0006955	P	immune response	56	486	443	24599	1.1e-26	2.3e-24	// Gga.3027.1.S1_at // GgaAffx.11201.1.S1_s_at // GgaAffx.968.3.S1_s_at // Gga.2510.1.S1_at // Gga.11645.2.S1_a_at // GgaAffx.7251.1.S1_at // Gga.419.1.A1_at // Gga.4954.2.S1_a_at // Gga.4458.1.S1_at // Gga.1193.1.S1_at // GgaAffx.2373.1.S1_s_at // Gga.6529.1.S1_at // GgaAffx.12703.1.S1_at // GgaAffx.9789.1.S1_at // Gga.4330.1.S1_at // Gga.9873.1.S1_at // GgaAffx.1625.1.S1_s_at // Gga.9133.1.S1_a…
GO:0002682	P	regulation of immune system process	28	486	192	24599	5.4e-16	7.7e-14	// Gga.3027.1.S1_at // GgaAffx.968.3.S1_s_at // Gga.2510.1.S1_at // Gga.11645.2.S1_a_at // Gga.1313.1.S1_s_at // Gga.4954.2.S1_a_at // Gga.1193.1.S1_at // Gga.4458.1.S1_at // Gga.6529.1.S1_at // GgaAffx.12646.1.S1_at // GgaAffx.9789.1.S1_at // Gga.4330.1.S1_at // Gga.9873.1.S1_at // GgaAffx.1625.1.S1_s_at // GgaAffx.25534.1.S1_s_at // Gga.2603.1.S1_at // GgaAffx.11648.1.S1_at // Gga.7298.1.S1_at …
GO:0002684	P	positive regulation of immune system process	22	486	122	24599	6.8e-15	7.3e-13	// GgaAffx.968.3.S1_s_at // Gga.2510.1.S1_at // Gga.11645.2.S1_a_at // Gga.1193.1.S1_at // Gga.4458.1.S1_at // Gga.6529.1.S1_at // GgaAffx.12646.1.S1_at // GgaAffx.9789.1.S1_at // Gga.4330.1.S1_at // GgaAffx.1625.1.S1_s_at // GgaAffx.11648.1.S1_at // Gga.7298.1.S1_at // Gga.916.1.S1_at // Gga.723.1.S1_a_at // Gga.11016.1.S1_at // Gga.9873.1.S1_at // Gga.4359.1.S1_s_at // Gga.2929.1.S1_at // GgaAf…
GO:0050776	P	regulation of immune response	21	486	117	24599	3e-14	2.6e-12	// GgaAffx.10617.2.S1_s_at // Gga.3027.1.S1_at // GgaAffx.25534.1.S1_s_at // GgaAffx.1625.1.S1_s_at // Gga.916.1.S1_at // Gga.2510.1.S1_at // GgaAffx.1032.1.S1_s_at // Gga.11645.2.S1_a_at // Gga.9873.1.S1_at // Gga.723.1.S1_a_at // Gga.11016.1.S1_at // Gga.7298.1.S1_at // GgaAffx.9789.1.S1_at // GgaAffx.2960.1.S1_s_at // Gga.1193.1.S1_at // Gga.4458.1.S1_at // Gga.6529.1.S1_at // Gga.4359.1.S1_s_…
GO:0032943	P	mononuclear cell proliferation	14	486	59	24599	9.6e-12	5.1e-10	// Gga.4330.1.S1_at // Gga.3027.1.S1_at // GgaAffx.968.3.S1_s_at // Gga.4359.1.S1_s_at // GgaAffx.25386.1.S1_at // GgaAffx.1032.1.S1_s_at // Gga.723.1.S1_a_at // Gga.380.1.S1_at // Gga.4458.1.S1_at // Gga.1193.1.S1_at // GgaAffx.25386.2.S1_s_at // GgaAffx.11648.1.S1_at // Gga.2929.1.S1_at // Gga.4350.1.S1_at
GO:0046651	P	lymphocyte proliferation	14	486	59	24599	9.6e-12	5.1e-10	// Gga.4330.1.S1_at // Gga.3027.1.S1_at // GgaAffx.968.3.S1_s_at // Gga.4359.1.S1_s_at // GgaAffx.25386.1.S1_at // GgaAffx.1032.1.S1_s_at // Gga.723.1.S1_a_at // Gga.380.1.S1_at // Gga.4458.1.S1_at // Gga.1193.1.S1_at // GgaAffx.25386.2.S1_s_at // GgaAffx.11648.1.S1_at // Gga.2929.1.S1_at // Gga.4350.1.S1_at
GO:0070661	P	leukocyte proliferation	14	486	59	24599	9.6e-12	5.1e-10	// Gga.4330.1.S1_at // Gga.3027.1.S1_at // GgaAffx.968.3.S1_s_at // Gga.4359.1.S1_s_at // GgaAffx.25386.1.S1_at // GgaAffx.1032.1.S1_s_at // Gga.723.1.S1_a_at // Gga.380.1.S1_at // Gga.4458.1.S1_at // Gga.1193.1.S1_at // GgaAffx.25386.2.S1_s_at // GgaAffx.11648.1.S1_at // Gga.2929.1.S1_at // Gga.4350.1.S1_at
GO:0001775	P	cell activation	23	486	198	24599	2.3e-11	1.1e-09	// Gga.3027.1.S1_at // GgaAffx.968.3.S1_s_at // Gga.998.2.S1_a_at // Gga.236.1.S1_at // Gga.1313.1.S1_s_at // Gga.1193.1.S1_at // Gga.4458.1.S1_at // Gga.6529.1.S1_at // GgaAffx.12646.1.S1_at // Gga.4330.1.S1_at // GgaAffx.25229.1.S1_at // GgaAffx.25534.1.S1_s_at // GgaAffx.25386.2.S1_s_at // GgaAffx.11648.1.S1_at // Gga.916.1.S1_at // GgaAffx.25386.1.S1_at // Gga.723.1.S1_a_at // Gga.11016.1.S1_…
GO:0002696	P	positive regulation of leukocyte activation	13	486	52	24599	2.5e-11	1.1e-09	// Gga.4330.1.S1_at // Gga.4359.1.S1_s_at // GgaAffx.968.3.S1_s_at // Gga.916.1.S1_at // Gga.2929.1.S1_at // GgaAffx.1032.1.S1_s_at // Gga.723.1.S1_a_at // Gga.380.1.S1_at // Gga.11016.1.S1_at // GgaAffx.11648.1.S1_at // Gga.1193.1.S1_at // Gga.6529.1.S1_at // GgaAffx.12646.1.S1_at
GO:0050867	P	positive regulation of cell activation	13	486	54	24599	4.3e-11	1.7e-09	// Gga.4330.1.S1_at // Gga.4359.1.S1_s_at // GgaAffx.968.3.S1_s_at // Gga.916.1.S1_at // Gga.2929.1.S1_at // GgaAffx.1032.1.S1_s_at // Gga.723.1.S1_a_at // Gga.380.1.S1_at // Gga.11016.1.S1_at // GgaAffx.11648.1.S1_at // Gga.1193.1.S1_at // Gga.6529.1.S1_at // GgaAffx.12646.1.S1_at
GO:0045321	P	leukocyte activation	21	486	171	24599	5.6e-11	2e-09	// Gga.4330.1.S1_at // Gga.3027.1.S1_at // Gga.4359.1.S1_s_at // GgaAffx.968.3.S1_s_at // Gga.916.1.S1_at // Gga.998.2.S1_a_at // GgaAffx.25386.1.S1_at // GgaAffx.1032.1.S1_s_at // Gga.2929.1.S1_at // Gga.236.1.S1_at // Gga.1313.1.S1_s_at // Gga.723.1.S1_a_at // Gga.380.1.S1_at // Gga.11016.1.S1_at // GgaAffx.11648.1.S1_at // Gga.4458.1.S1_at // Gga.1193.1.S1_at // GgaAffx.25386.2.S1_s_at // Gga.…
GO:0050871	P	positive regulation of B cell activation	9	486	22	24599	2e-10	6.5e-09	// Gga.4330.1.S1_at // Gga.4359.1.S1_s_at // Gga.916.1.S1_at // Gga.2929.1.S1_at // GgaAffx.1032.1.S1_s_at // Gga.723.1.S1_a_at // Gga.380.1.S1_at // Gga.1193.1.S1_at // GgaAffx.11648.1.S1_at
GO:0050778	P	positive regulation of immune response	15	486	87	24599	2.3e-10	7e-09	// GgaAffx.968.3.S1_s_at // Gga.4359.1.S1_s_at // Gga.2510.1.S1_at // Gga.7298.1.S1_at // Gga.11645.2.S1_a_at // Gga.723.1.S1_a_at // Gga.11016.1.S1_at // GgaAffx.9789.1.S1_at // GgaAffx.2960.1.S1_s_at // Gga.1193.1.S1_at // Gga.4458.1.S1_at // Gga.6529.1.S1_at // Gga.9873.1.S1_at // Gga.4350.1.S1_at // GgaAffx.1625.1.S1_s_at
GO:0051251	P	positive regulation of lymphocyte activation	12	486	51	24599	3.1e-10	8.5e-09	// Gga.4330.1.S1_at // Gga.4359.1.S1_s_at // GgaAffx.968.3.S1_s_at // Gga.916.1.S1_at // Gga.2929.1.S1_at // GgaAffx.1032.1.S1_s_at // Gga.723.1.S1_a_at // Gga.380.1.S1_at // Gga.11016.1.S1_at // Gga.1193.1.S1_at // GgaAffx.11648.1.S1_at // GgaAffx.12646.1.S1_at
GO:0042100	P	B cell proliferation	9	486	23	24599	3.2e-10	8.5e-09	// Gga.4330.1.S1_at // Gga.3027.1.S1_at // Gga.4359.1.S1_s_at // Gga.2929.1.S1_at // GgaAffx.1032.1.S1_s_at // Gga.380.1.S1_at // Gga.1193.1.S1_at // Gga.4458.1.S1_at // GgaAffx.11648.1.S1_at
GO:0048583	P	regulation of response to stimulus	24	486	247	24599	3.6e-10	9e-09	// Gga.3027.1.S1_at // Gga.10606.1.S1_at // GgaAffx.968.3.S1_s_at // Gga.2510.1.S1_at // Gga.11645.2.S1_a_at // Gga.1193.1.S1_at // Gga.4458.1.S1_at // GgaAffx.10617.2.S1_s_at // Gga.6713.1.S1_at // Gga.6529.1.S1_at // GgaAffx.9789.1.S1_at // GgaAffx.1625.1.S1_s_at // GgaAffx.25534.1.S1_s_at // GgaAffx.11648.1.S1_at // Gga.7298.1.S1_at // Gga.916.1.S1_at // Gga.723.1.S1_a_at // Gga.11016.1.S1_at …
GO:0046649	P	lymphocyte activation	19	486	154	24599	4.1e-10	9.6e-09	// Gga.4330.1.S1_at // Gga.3027.1.S1_at // Gga.4359.1.S1_s_at // GgaAffx.968.3.S1_s_at // Gga.916.1.S1_at // Gga.998.2.S1_a_at // GgaAffx.25386.1.S1_at // GgaAffx.1032.1.S1_s_at // Gga.2929.1.S1_at // Gga.1313.1.S1_s_at // Gga.723.1.S1_a_at // Gga.380.1.S1_at // Gga.11016.1.S1_at // Gga.4458.1.S1_at // Gga.1193.1.S1_at // GgaAffx.25386.2.S1_s_at // GgaAffx.11648.1.S1_at // GgaAffx.12646.1.S1_at /…
GO:0002252	P	immune effector process	16	486	114	24599	1.4e-09	3.1e-08	// Gga.3027.1.S1_at // Gga.4359.1.S1_s_at // GgaAffx.1625.1.S1_s_at // Gga.916.1.S1_at // Gga.2510.1.S1_at // GgaAffx.1032.1.S1_s_at // Gga.11645.2.S1_a_at // Gga.9873.1.S1_at // Gga.723.1.S1_a_at // Gga.11016.1.S1_at // Gga.7298.1.S1_at // Gga.1193.1.S1_at // Gga.6529.1.S1_at // GgaAffx.10617.2.S1_s_at // GgaAffx.11648.1.S1_at // GgaAffx.2960.1.S1_s_at
GO:0002697	P	regulation of immune effector process	9	486	27	24599	1.7e-09	3.4e-08	// Gga.3027.1.S1_at // Gga.916.1.S1_at // Gga.2510.1.S1_at // Gga.11645.2.S1_a_at // Gga.723.1.S1_a_at // Gga.1193.1.S1_at // Gga.6529.1.S1_at // GgaAffx.11648.1.S1_at // GgaAffx.10617.2.S1_s_at
GO:0050864	P	regulation of B cell activation	9	486	27	24599	1.7e-09	3.4e-08	// Gga.4330.1.S1_at // Gga.4359.1.S1_s_at // Gga.916.1.S1_at // Gga.2929.1.S1_at // GgaAffx.1032.1.S1_s_at // Gga.723.1.S1_a_at // Gga.380.1.S1_at // Gga.1193.1.S1_at // GgaAffx.11648.1.S1_at
GO:0050896	P	response to stimulus	101	486	2588	24599	3.3e-09	6.3e-08	// GgaAffx.11201.1.S1_s_at // Gga.13336.3.S1_x_at // GgaAffx.7443.1.S1_at // Gga.918.1.S1_at // Gga.4954.2.S1_a_at // Gga.1193.1.S1_at // Gga.6387.1.S1_at // Gga.6529.1.S1_at // GgaAffx.12703.1.S1_at // GgaAffx.9789.1.S1_at // Gga.4110.4.S1_x_at // Gga.12516.1.S1_s_at // Gga.7148.1.S1_at // Gga.14571.1.S1_s_at // Gga.7298.1.S1_at // GgaAffx.5458.1.S1_at // GgaAffx.2373.1.S1_s_at // GgaAffx.20792.…
GO:0002520	P	immune system development	23	486	255	24599	3.4e-09	6.3e-08	// Gga.3027.1.S1_at // GgaAffx.968.3.S1_s_at // Gga.998.2.S1_a_at // GgaAffx.7443.1.S1_at // Gga.1313.1.S1_s_at // Gga.4954.2.S1_a_at // Gga.1193.1.S1_at // Gga.4458.1.S1_at // GgaAffx.12646.1.S1_at // GgaAffx.24185.1.S1_at // GgaAffx.8515.1.S1_at // GgaAffx.25386.2.S1_s_at // GgaAffx.11648.1.S1_at // Gga.198.1.S1_at // Gga.916.1.S1_at // GgaAffx.25386.1.S1_at // Gga.723.1.S1_a_at // Gga.11016.1.…
GO:0002694	P	regulation of leukocyte activation	13	486	76	24599	3.9e-09	6.6e-08	// Gga.4330.1.S1_at // Gga.4359.1.S1_s_at // GgaAffx.968.3.S1_s_at // Gga.916.1.S1_at // Gga.2929.1.S1_at // GgaAffx.1032.1.S1_s_at // Gga.723.1.S1_a_at // Gga.380.1.S1_at // Gga.11016.1.S1_at // GgaAffx.11648.1.S1_at // Gga.1193.1.S1_at // Gga.6529.1.S1_at // GgaAffx.12646.1.S1_at
GO:0002504	P	antigen processing and presentation of peptide or polysaccharide antigen via MHC class II	8	486	21	24599	4e-09	6.6e-08	// Gga.419.1.A1_at // Gga.13336.3.S1_x_at // Gga.5048.1.A1_at // Gga.11016.1.S1_at // Gga.5137.1.S1_x_at // Gga.13336.5.S1_x_at // Gga.6529.1.S1_at // Gga.13336.3.S1_a_at
GO:0048534	P	hemopoietic or lymphoid organ development	22	486	236	24599	4e-09	6.6e-08	// Gga.3027.1.S1_at // GgaAffx.968.3.S1_s_at // Gga.998.2.S1_a_at // GgaAffx.7443.1.S1_at // Gga.1313.1.S1_s_at // Gga.4954.2.S1_a_at // Gga.1193.1.S1_at // Gga.4458.1.S1_at // GgaAffx.12646.1.S1_at // GgaAffx.24185.1.S1_at // GgaAffx.8515.1.S1_at // GgaAffx.25386.2.S1_s_at // GgaAffx.11648.1.S1_at // Gga.198.1.S1_at // GgaAffx.25386.1.S1_at // Gga.723.1.S1_a_at // Gga.11016.1.S1_at // Gga.2603.1…
GO:0050865	P	regulation of cell activation	13	486	78	24599	5.4e-09	8.5e-08	// Gga.4330.1.S1_at // Gga.4359.1.S1_s_at // GgaAffx.968.3.S1_s_at // Gga.916.1.S1_at // Gga.2929.1.S1_at // GgaAffx.1032.1.S1_s_at // Gga.723.1.S1_a_at // Gga.380.1.S1_at // Gga.11016.1.S1_at // GgaAffx.11648.1.S1_at // Gga.1193.1.S1_at // Gga.6529.1.S1_at // GgaAffx.12646.1.S1_at
GO:0006952	P	defense response	34	486	531	24599	7.3e-09	1.1e-07	// Gga.3027.1.S1_at // GgaAffx.11201.1.S1_s_at // Gga.2510.1.S1_at // Gga.11645.2.S1_a_at // GgaAffx.7251.1.S1_at // Gga.4884.1.S1_at // Gga.1193.1.S1_at // GgaAffx.9165.1.A1_x_at // Gga.6529.1.S1_at // GgaAffx.12703.1.S1_at // GgaAffx.9789.1.S1_at // Gga.16589.1.S1_at // Gga.9873.1.S1_at // GgaAffx.1625.1.S1_s_at // Gga.7539.1.S1_at // GgaAffx.10393.1.S1_at // GgaAffx.7589.1.S1_at // Gga.9103.1.…
GO:0009605	P	response to external stimulus	41	486	722	24599	7.8e-09	1.1e-07	// Gga.3027.1.S1_at // Gga.6387.1.S1_at // Gga.2510.1.S1_at // Gga.11645.2.S1_a_at // GgaAffx.7251.1.S1_at // GgaAffx.10876.2.S1_s_at // Gga.4884.1.S1_at // Gga.6529.1.S1_at // Gga.6713.1.S1_at // Gga.16589.1.S1_at // GgaAffx.1625.1.S1_s_at // Gga.9133.1.S1_at // GgaAffx.10393.1.S1_at // GgaAffx.7589.1.S1_at // GgaAffx.25534.1.S1_s_at // GgaAffx.9461.1.S1_at // GgaAffx.21790.1.S1_s_at // GgaAffx.…
GO:0002250	P	adaptive immune response	13	486	81	24599	8.7e-09	1.2e-07	// Gga.3027.1.S1_at // Gga.4359.1.S1_s_at // Gga.916.1.S1_at // Gga.2510.1.S1_at // GgaAffx.1032.1.S1_s_at // Gga.723.1.S1_a_at // Gga.11016.1.S1_at // Gga.7298.1.S1_at // Gga.1193.1.S1_at // Gga.6529.1.S1_at // Gga.9873.1.S1_at // GgaAffx.11648.1.S1_at // GgaAffx.2960.1.S1_s_at
GO:0002460	P	adaptive immune response based on somatic recombination of immune receptors built from immunoglobulin superfamily domains	13	486	81	24599	8.7e-09	1.2e-07	// Gga.3027.1.S1_at // Gga.4359.1.S1_s_at // Gga.916.1.S1_at // Gga.2510.1.S1_at // GgaAffx.1032.1.S1_s_at // Gga.723.1.S1_a_at // Gga.11016.1.S1_at // Gga.7298.1.S1_at // Gga.1193.1.S1_at // Gga.6529.1.S1_at // Gga.9873.1.S1_at // GgaAffx.11648.1.S1_at // GgaAffx.2960.1.S1_s_at
GO:0030098	P	lymphocyte differentiation	13	486	83	24599	1.2e-08	1.6e-07	// Gga.3027.1.S1_at // GgaAffx.968.3.S1_s_at // Gga.998.2.S1_a_at // GgaAffx.25386.1.S1_at // GgaAffx.1032.1.S1_s_at // Gga.1313.1.S1_s_at // Gga.723.1.S1_a_at // Gga.11016.1.S1_at // Gga.4458.1.S1_at // Gga.1193.1.S1_at // GgaAffx.25386.2.S1_s_at // GgaAffx.11648.1.S1_at // GgaAffx.12646.1.S1_at
GO:0002253	P	activation of immune response	12	486	70	24599	1.5e-08	1.9e-07	// GgaAffx.1625.1.S1_s_at // Gga.2510.1.S1_at // Gga.7298.1.S1_at // Gga.11645.2.S1_a_at // GgaAffx.9789.1.S1_at // GgaAffx.2960.1.S1_s_at // Gga.1193.1.S1_at // Gga.4458.1.S1_at // Gga.6529.1.S1_at // Gga.9873.1.S1_at // Gga.4350.1.S1_at // GgaAffx.968.3.S1_s_at
GO:0051249	P	regulation of lymphocyte activation	12	486	70	24599	1.5e-08	1.9e-07	// Gga.4330.1.S1_at // Gga.4359.1.S1_s_at // GgaAffx.968.3.S1_s_at // Gga.916.1.S1_at // Gga.2929.1.S1_at // GgaAffx.1032.1.S1_s_at // Gga.723.1.S1_a_at // Gga.380.1.S1_at // Gga.11016.1.S1_at // Gga.1193.1.S1_at // GgaAffx.11648.1.S1_at // GgaAffx.12646.1.S1_at
GO:0019882	P	antigen processing and presentation	11	486	57	24599	1.6e-08	1.9e-07	// Gga.419.1.A1_at // Gga.916.1.S1_at // Gga.13336.3.S1_x_at // Gga.4973.3.S1_x_at // Gga.13336.3.S1_a_at // Gga.11016.1.S1_at // Gga.5137.1.S1_x_at // Gga.13336.5.S1_x_at // Gga.6529.1.S1_at // Gga.5048.1.A1_at // Gga.4414.1.S1_s_at
GO:0016064	P	immunoglobulin mediated immune response	11	486	59	24599	2.3e-08	2.7e-07	// Gga.3027.1.S1_at // Gga.916.1.S1_at // Gga.2510.1.S1_at // GgaAffx.1032.1.S1_s_at // Gga.723.1.S1_a_at // Gga.11016.1.S1_at // Gga.7298.1.S1_at // Gga.6529.1.S1_at // Gga.9873.1.S1_at // GgaAffx.11648.1.S1_at // GgaAffx.2960.1.S1_s_at
GO:0019724	P	B cell mediated immunity	11	486	59	24599	2.3e-08	2.7e-07	// Gga.3027.1.S1_at // Gga.916.1.S1_at // Gga.2510.1.S1_at // GgaAffx.1032.1.S1_s_at // Gga.723.1.S1_a_at // Gga.11016.1.S1_at // Gga.7298.1.S1_at // Gga.6529.1.S1_at // Gga.9873.1.S1_at // GgaAffx.11648.1.S1_at // GgaAffx.2960.1.S1_s_at
GO:0009611	P	response to wounding	29	486	428	24599	2.5e-08	2.8e-07	// Gga.3027.1.S1_at // Gga.2510.1.S1_at // Gga.11645.2.S1_a_at // GgaAffx.10876.2.S1_s_at // Gga.4884.1.S1_at // Gga.6529.1.S1_at // Gga.6713.1.S1_at // Gga.12516.1.S1_s_at // GgaAffx.1625.1.S1_s_at // Gga.9133.1.S1_at // GgaAffx.10393.1.S1_at // GgaAffx.7589.1.S1_at // GgaAffx.25534.1.S1_s_at // GgaAffx.9461.1.S1_at // GgaAffx.21790.1.S1_s_at // GgaAffx.11648.1.S1_at // Gga.1020.1.S1_at // Gga.1…
GO:0002449	P	lymphocyte mediated immunity	12	486	74	24599	2.8e-08	3.1e-07	// Gga.3027.1.S1_at // Gga.916.1.S1_at // Gga.2510.1.S1_at // GgaAffx.1032.1.S1_s_at // Gga.723.1.S1_a_at // Gga.11016.1.S1_at // Gga.7298.1.S1_at // Gga.1193.1.S1_at // Gga.6529.1.S1_at // Gga.9873.1.S1_at // GgaAffx.11648.1.S1_at // GgaAffx.2960.1.S1_s_at
GO:0032844	P	regulation of homeostatic process	10	486	48	24599	3.3e-08	3.5e-07	// Gga.6553.1.S1_at // Gga.916.1.S1_at // GgaAffx.1032.1.S1_s_at // Gga.9541.1.S1_at // Gga.1313.1.S1_s_at // Gga.4954.2.S1_a_at // Gga.1193.1.S1_at // Gga.2603.1.S1_at // Gga.6529.1.S1_at // Gga.6713.1.S1_at
GO:0048584	P	positive regulation of response to stimulus	15	486	125	24599	3.8e-08	3.8e-07	// GgaAffx.968.3.S1_s_at // Gga.4359.1.S1_s_at // Gga.2510.1.S1_at // Gga.7298.1.S1_at // Gga.11645.2.S1_a_at // Gga.723.1.S1_a_at // Gga.11016.1.S1_at // GgaAffx.9789.1.S1_at // GgaAffx.2960.1.S1_s_at // Gga.1193.1.S1_at // Gga.4458.1.S1_at // Gga.6529.1.S1_at // Gga.9873.1.S1_at // Gga.4350.1.S1_at // GgaAffx.1625.1.S1_s_at
GO:0032946	P	positive regulation of mononuclear cell proliferation	8	486	27	24599	3.9e-08	3.8e-07	// Gga.4330.1.S1_at // GgaAffx.968.3.S1_s_at // Gga.4359.1.S1_s_at // Gga.2929.1.S1_at // Gga.723.1.S1_a_at // Gga.380.1.S1_at // Gga.1193.1.S1_at // GgaAffx.11648.1.S1_at
GO:0050671	P	positive regulation of lymphocyte proliferation	8	486	27	24599	3.9e-08	3.8e-07	// Gga.4330.1.S1_at // GgaAffx.968.3.S1_s_at // Gga.4359.1.S1_s_at // Gga.2929.1.S1_at // Gga.723.1.S1_a_at // Gga.380.1.S1_at // Gga.1193.1.S1_at // GgaAffx.11648.1.S1_at
GO:0070665	P	positive regulation of leukocyte proliferation	8	486	27	24599	3.9e-08	3.8e-07	// Gga.4330.1.S1_at // GgaAffx.968.3.S1_s_at // Gga.4359.1.S1_s_at // Gga.2929.1.S1_at // Gga.723.1.S1_a_at // Gga.380.1.S1_at // Gga.1193.1.S1_at // GgaAffx.11648.1.S1_at
GO:0030888	P	regulation of B cell proliferation	7	486	19	24599	5.1e-08	4.8e-07	// Gga.4330.1.S1_at // Gga.4359.1.S1_s_at // Gga.2929.1.S1_at // GgaAffx.1032.1.S1_s_at // Gga.380.1.S1_at // Gga.1193.1.S1_at // GgaAffx.11648.1.S1_at
GO:0045061	P	thymic T cell selection	6	486	12	24599	5.2e-08	4.8e-07	// GgaAffx.968.3.S1_s_at // Gga.998.2.S1_a_at // GgaAffx.25386.1.S1_at // Gga.723.1.S1_a_at // Gga.11016.1.S1_at // GgaAffx.25386.2.S1_s_at
GO:0032944	P	regulation of mononuclear cell proliferation	9	486	39	24599	6.2e-08	5.3e-07	// Gga.4330.1.S1_at // GgaAffx.968.3.S1_s_at // Gga.4359.1.S1_s_at // Gga.2929.1.S1_at // GgaAffx.1032.1.S1_s_at // Gga.723.1.S1_a_at // Gga.380.1.S1_at // Gga.1193.1.S1_at // GgaAffx.11648.1.S1_at
GO:0050670	P	regulation of lymphocyte proliferation	9	486	39	24599	6.2e-08	5.3e-07	// Gga.4330.1.S1_at // GgaAffx.968.3.S1_s_at // Gga.4359.1.S1_s_at // Gga.2929.1.S1_at // GgaAffx.1032.1.S1_s_at // Gga.723.1.S1_a_at // Gga.380.1.S1_at // Gga.1193.1.S1_at // GgaAffx.11648.1.S1_at
GO:0070663	P	regulation of leukocyte proliferation	9	486	39	24599	6.2e-08	5.3e-07	// Gga.4330.1.S1_at // GgaAffx.968.3.S1_s_at // Gga.4359.1.S1_s_at // Gga.2929.1.S1_at // GgaAffx.1032.1.S1_s_at // Gga.723.1.S1_a_at // Gga.380.1.S1_at // Gga.1193.1.S1_at // GgaAffx.11648.1.S1_at
GO:0030097	P	hemopoiesis	19	486	209	24599	6.3e-08	5.4e-07	// Gga.198.1.S1_at // Gga.3027.1.S1_at // GgaAffx.968.3.S1_s_at // Gga.998.2.S1_a_at // GgaAffx.25386.1.S1_at // GgaAffx.1032.1.S1_s_at // Gga.4458.1.S1_at // GgaAffx.7443.1.S1_at // Gga.1313.1.S1_s_at // Gga.723.1.S1_a_at // Gga.11016.1.S1_at // Gga.4954.2.S1_a_at // GgaAffx.25386.2.S1_s_at // Gga.1193.1.S1_at // Gga.2603.1.S1_at // GgaAffx.11648.1.S1_at // Gga.578.1.S1_at // GgaAffx.12646.1.S1_…
GO:0002443	P	leukocyte mediated immunity	12	486	80	24599	6.9e-08	5.8e-07	// Gga.3027.1.S1_at // Gga.916.1.S1_at // Gga.2510.1.S1_at // GgaAffx.1032.1.S1_s_at // Gga.723.1.S1_a_at // Gga.11016.1.S1_at // Gga.7298.1.S1_at // Gga.1193.1.S1_at // Gga.6529.1.S1_at // Gga.9873.1.S1_at // GgaAffx.11648.1.S1_at // GgaAffx.2960.1.S1_s_at
GO:0002521	P	leukocyte differentiation	14	486	118	24599	1.2e-07	1e-06	// Gga.198.1.S1_at // Gga.3027.1.S1_at // GgaAffx.968.3.S1_s_at // Gga.998.2.S1_a_at // GgaAffx.25386.1.S1_at // GgaAffx.1032.1.S1_s_at // Gga.1313.1.S1_s_at // Gga.723.1.S1_a_at // Gga.11016.1.S1_at // Gga.4458.1.S1_at // Gga.1193.1.S1_at // GgaAffx.25386.2.S1_s_at // GgaAffx.11648.1.S1_at // GgaAffx.12646.1.S1_at
GO:0002819	P	regulation of adaptive immune response	7	486	22	24599	1.6e-07	1.3e-06	// Gga.4359.1.S1_s_at // Gga.2510.1.S1_at // Gga.916.1.S1_at // Gga.723.1.S1_a_at // Gga.1193.1.S1_at // GgaAffx.11648.1.S1_at // Gga.6529.1.S1_at
GO:0002822	P	regulation of adaptive immune response based on somatic recombination of immune receptors built from immunoglobulin superfamily domains	7	486	22	24599	1.6e-07	1.3e-06	// Gga.4359.1.S1_s_at // Gga.2510.1.S1_at // Gga.916.1.S1_at // Gga.723.1.S1_a_at // Gga.1193.1.S1_at // GgaAffx.11648.1.S1_at // Gga.6529.1.S1_at
GO:0045058	P	T cell selection	6	486	14	24599	1.6e-07	1.3e-06	// GgaAffx.968.3.S1_s_at // Gga.998.2.S1_a_at // GgaAffx.25386.1.S1_at // Gga.723.1.S1_a_at // Gga.11016.1.S1_at // GgaAffx.25386.2.S1_s_at
GO:0042113	P	B cell activation	11	486	71	24599	1.7e-07	1.3e-06	// Gga.4330.1.S1_at // Gga.3027.1.S1_at // Gga.4359.1.S1_s_at // Gga.916.1.S1_at // Gga.2929.1.S1_at // GgaAffx.1032.1.S1_s_at // Gga.723.1.S1_a_at // Gga.380.1.S1_at // Gga.1193.1.S1_at // Gga.4458.1.S1_at // GgaAffx.11648.1.S1_at
GO:0030890	P	positive regulation of B cell proliferation	6	486	15	24599	2.7e-07	2e-06	// Gga.4330.1.S1_at // Gga.4359.1.S1_s_at // Gga.2929.1.S1_at // Gga.380.1.S1_at // Gga.1193.1.S1_at // GgaAffx.11648.1.S1_at
GO:0002712	P	regulation of B cell mediated immunity	5	486	9	24599	3.7e-07	2.6e-06	// GgaAffx.11648.1.S1_at // Gga.6529.1.S1_at // Gga.723.1.S1_a_at // Gga.2510.1.S1_at // Gga.916.1.S1_at
GO:0002889	P	regulation of immunoglobulin mediated immune response	5	486	9	24599	3.7e-07	2.6e-06	// GgaAffx.11648.1.S1_at // Gga.6529.1.S1_at // Gga.723.1.S1_a_at // Gga.2510.1.S1_at // Gga.916.1.S1_at
GO:0043368	P	positive T cell selection	5	486	9	24599	3.7e-07	2.6e-06	// Gga.998.2.S1_a_at // GgaAffx.25386.2.S1_s_at // GgaAffx.25386.1.S1_at // Gga.11016.1.S1_at // GgaAffx.968.3.S1_s_at
GO:0045059	P	positive thymic T cell selection	5	486	9	24599	3.7e-07	2.6e-06	// Gga.998.2.S1_a_at // GgaAffx.25386.2.S1_s_at // GgaAffx.25386.1.S1_at // Gga.11016.1.S1_at // GgaAffx.968.3.S1_s_at
GO:0006935	P	chemotaxis	13	486	112	24599	4.4e-07	3e-06	// Gga.16589.1.S1_at // Gga.6387.1.S1_at // Gga.9133.1.S1_at // Gga.916.1.S1_at // GgaAffx.25386.1.S1_at // Gga.566.1.S1_at // GgaAffx.7251.1.S1_at // Gga.296.1.S1_at // Gga.7100.1.S1_at // GgaAffx.25386.2.S1_s_at // Gga.6529.1.S1_at // Gga.1020.1.S1_at // GgaAffx.7589.1.S1_at
GO:0042330	P	taxis	13	486	112	24599	4.4e-07	3e-06	// Gga.16589.1.S1_at // Gga.6387.1.S1_at // Gga.9133.1.S1_at // Gga.916.1.S1_at // GgaAffx.25386.1.S1_at // Gga.566.1.S1_at // GgaAffx.7251.1.S1_at // Gga.296.1.S1_at // Gga.7100.1.S1_at // GgaAffx.25386.2.S1_s_at // Gga.6529.1.S1_at // Gga.1020.1.S1_at // GgaAffx.7589.1.S1_at
GO:0006959	P	humoral immune response	10	486	63	24599	4.9e-07	3.2e-06	// Gga.4110.4.S1_x_at // Gga.9873.1.S1_at // GgaAffx.1625.1.S1_s_at // Gga.2510.1.S1_at // GgaAffx.7443.1.S1_at // GgaAffx.7251.1.S1_at // Gga.11645.2.S1_a_at // Gga.7298.1.S1_at // GgaAffx.5322.1.S1_at // GgaAffx.2960.1.S1_s_at
GO:0030217	P	T cell differentiation	9	486	52	24599	8.4e-07	5.5e-06	// GgaAffx.968.3.S1_s_at // Gga.998.2.S1_a_at // GgaAffx.25386.1.S1_at // Gga.723.1.S1_a_at // Gga.11016.1.S1_at // Gga.1193.1.S1_at // GgaAffx.25386.2.S1_s_at // GgaAffx.11648.1.S1_at // GgaAffx.12646.1.S1_at
GO:0033077	P	T cell differentiation in the thymus	6	486	18	24599	9.4e-07	6e-06	// GgaAffx.968.3.S1_s_at // Gga.998.2.S1_a_at // GgaAffx.25386.1.S1_at // Gga.723.1.S1_a_at // Gga.11016.1.S1_at // GgaAffx.25386.2.S1_s_at
GO:0006954	P	inflammatory response	19	486	252	24599	1.1e-06	7.1e-06	// Gga.3027.1.S1_at // Gga.9873.1.S1_at // GgaAffx.1625.1.S1_s_at // Gga.9133.1.S1_at // GgaAffx.10393.1.S1_at // GgaAffx.11258.2.S1_s_at // Gga.19.1.S1_at // Gga.11645.2.S1_a_at // Gga.2510.1.S1_at // Gga.723.1.S1_a_at // Gga.4884.1.S1_at // GgaAffx.11648.1.S1_at // Gga.7298.1.S1_at // Gga.7100.1.S1_at // Gga.6529.1.S1_at // Gga.1020.1.S1_at // Gga.14571.1.S1_s_at // GgaAffx.2960.1.S1_s_at // Gg…
GO:0002706	P	regulation of lymphocyte mediated immunity	6	486	19	24599	1.3e-06	8.4e-06	// Gga.916.1.S1_at // Gga.2510.1.S1_at // Gga.723.1.S1_a_at // Gga.1193.1.S1_at // GgaAffx.11648.1.S1_at // Gga.6529.1.S1_at
GO:0042110	P	T cell activation	11	486	90	24599	2e-06	1.2e-05	// GgaAffx.968.3.S1_s_at // Gga.4359.1.S1_s_at // Gga.998.2.S1_a_at // GgaAffx.25386.1.S1_at // Gga.723.1.S1_a_at // Gga.11016.1.S1_at // Gga.1193.1.S1_at // GgaAffx.25386.2.S1_s_at // GgaAffx.11648.1.S1_at // GgaAffx.12646.1.S1_at // Gga.4350.1.S1_at
GO:0001816	P	cytokine production	11	486	91	24599	2.2e-06	1.3e-05	// Gga.6072.2.S1_at // Gga.3027.1.S1_at // Gga.916.1.S1_at // GgaAffx.10617.2.S1_s_at // GgaAffx.1032.1.S1_s_at // Gga.9541.1.S1_at // Gga.4374.1.S1_a_at // Gga.723.1.S1_a_at // Gga.6529.1.S1_at // GgaAffx.11648.1.S1_at // Gga.236.1.S1_at
GO:0002703	P	regulation of leukocyte mediated immunity	6	486	21	24599	2.6e-06	1.6e-05	// Gga.916.1.S1_at // Gga.2510.1.S1_at // Gga.723.1.S1_a_at // Gga.1193.1.S1_at // GgaAffx.11648.1.S1_at // Gga.6529.1.S1_at
GO:0042098	P	T cell proliferation	7	486	35	24599	5.1e-06	3e-05	// GgaAffx.968.3.S1_s_at // Gga.4359.1.S1_s_at // GgaAffx.25386.1.S1_at // Gga.723.1.S1_a_at // Gga.1193.1.S1_at // GgaAffx.25386.2.S1_s_at // Gga.4350.1.S1_at
GO:0048872	P	homeostasis of number of cells	9	486	65	24599	5.8e-06	3.4e-05	// Gga.4359.1.S1_s_at // Gga.916.1.S1_at // GgaAffx.1032.1.S1_s_at // Gga.9541.1.S1_at // Gga.1313.1.S1_s_at // Gga.4954.2.S1_a_at // Gga.2603.1.S1_at // Gga.6529.1.S1_at // GgaAffx.11648.1.S1_at
GO:0001817	P	regulation of cytokine production	9	486	67	24599	7.5e-06	4.3e-05	// Gga.6072.2.S1_at // Gga.3027.1.S1_at // Gga.916.1.S1_at // GgaAffx.10617.2.S1_s_at // GgaAffx.1032.1.S1_s_at // Gga.4374.1.S1_a_at // Gga.723.1.S1_a_at // GgaAffx.11648.1.S1_at // Gga.6529.1.S1_at
GO:0002440	P	production of molecular mediator of immune response	7	486	37	24599	7.5e-06	4.3e-05	// Gga.3027.1.S1_at // Gga.4359.1.S1_s_at // Gga.916.1.S1_at // Gga.723.1.S1_a_at // Gga.1193.1.S1_at // GgaAffx.11648.1.S1_at // Gga.6529.1.S1_at
GO:0002429	P	immune response-activating cell surface receptor signaling pathway	6	486	25	24599	7.9e-06	4.4e-05	// GgaAffx.968.3.S1_s_at // Gga.4350.1.S1_at // Gga.1193.1.S1_at // Gga.4458.1.S1_at // Gga.6529.1.S1_at // GgaAffx.9789.1.S1_at
GO:0002700	P	regulation of production of molecular mediator of immune response	5	486	15	24599	7.9e-06	4.4e-05	// GgaAffx.11648.1.S1_at // Gga.6529.1.S1_at // Gga.723.1.S1_a_at // Gga.3027.1.S1_at // Gga.916.1.S1_at
GO:0002768	P	immune response-regulating cell surface receptor signaling pathway	6	486	26	24599	1e-05	5.5e-05	// GgaAffx.968.3.S1_s_at // Gga.4350.1.S1_at // Gga.1193.1.S1_at // Gga.4458.1.S1_at // Gga.6529.1.S1_at // GgaAffx.9789.1.S1_at
GO:0048585	P	negative regulation of response to stimulus	7	486	39	24599	1.1e-05	5.9e-05	// Gga.6553.1.S1_at // GgaAffx.1032.1.S1_s_at // Gga.10606.1.S1_at // GgaAffx.25534.1.S1_s_at // Gga.1193.1.S1_at // GgaAffx.11648.1.S1_at // Gga.6713.1.S1_at
GO:0032963	P	collagen metabolic process	6	486	27	24599	1.3e-05	6.7e-05	// Gga.198.1.S1_at // GgaAffx.25192.2.S1_s_at // GgaAffx.25534.1.S1_s_at // Gga.12800.1.S1_at // GgaAffx.11429.1.S1_s_at // GgaAffx.11018.1.S1_s_at
GO:0044259	P	multicellular organismal macromolecule metabolic process	6	486	27	24599	1.3e-05	6.7e-05	// Gga.198.1.S1_at // GgaAffx.25192.2.S1_s_at // GgaAffx.25534.1.S1_s_at // Gga.12800.1.S1_at // GgaAffx.11429.1.S1_s_at // GgaAffx.11018.1.S1_s_at
GO:0002757	P	immune response-activating signal transduction	6	486	28	24599	1.6e-05	8.3e-05	// GgaAffx.968.3.S1_s_at // Gga.4350.1.S1_at // Gga.1193.1.S1_at // Gga.4458.1.S1_at // Gga.6529.1.S1_at // GgaAffx.9789.1.S1_at
GO:0002764	P	immune response-regulating signaling pathway	6	486	29	24599	2e-05	0.0001	// GgaAffx.968.3.S1_s_at // Gga.4350.1.S1_at // Gga.1193.1.S1_at // Gga.4458.1.S1_at // Gga.6529.1.S1_at // GgaAffx.9789.1.S1_at
GO:0045087	P	innate immune response	10	486	94	24599	2e-05	0.0001	// GgaAffx.11201.1.S1_s_at // Gga.2529.1.S1_a_at // GgaAffx.1625.1.S1_s_at // Gga.2510.1.S1_at // Gga.11645.2.S1_a_at // GgaAffx.2960.1.S1_s_at // GgaAffx.10617.2.S1_s_at // Gga.9873.1.S1_at // GgaAffx.12703.1.S1_at // Gga.7298.1.S1_at
GO:0002377	P	immunoglobulin production	6	486	31	24599	3e-05	0.00015	// Gga.3027.1.S1_at // Gga.4359.1.S1_s_at // Gga.916.1.S1_at // Gga.723.1.S1_a_at // Gga.1193.1.S1_at // GgaAffx.11648.1.S1_at
GO:0046631	P	alpha-beta T cell activation	6	486	32	24599	3.6e-05	0.00018	// GgaAffx.968.3.S1_s_at // GgaAffx.25386.1.S1_at // Gga.723.1.S1_a_at // GgaAffx.25386.2.S1_s_at // GgaAffx.11648.1.S1_at // GgaAffx.12646.1.S1_at
GO:0009306	P	protein secretion	7	486	47	24599	3.9e-05	0.00019	// Gga.6072.2.S1_at // Gga.3027.1.S1_at // Gga.4359.1.S1_s_at // Gga.916.1.S1_at // Gga.9541.1.S1_at // Gga.701.1.S1_at // Gga.236.1.S1_at
GO:0050870	P	positive regulation of T cell activation	6	486	34	24599	5.2e-05	0.00025	// GgaAffx.968.3.S1_s_at // Gga.4359.1.S1_s_at // Gga.723.1.S1_a_at // Gga.11016.1.S1_at // Gga.1193.1.S1_at // GgaAffx.12646.1.S1_at
GO:0044236	P	multicellular organismal metabolic process	6	486	35	24599	6.1e-05	0.00029	// Gga.198.1.S1_at // GgaAffx.25192.2.S1_s_at // GgaAffx.25534.1.S1_s_at // Gga.12800.1.S1_at // GgaAffx.11429.1.S1_s_at // GgaAffx.11018.1.S1_s_at
GO:0050900	P	leukocyte migration	6	486	35	24599	6.1e-05	0.00029	// Gga.566.1.S1_at // Gga.916.1.S1_at // GgaAffx.25386.1.S1_at // GgaAffx.9461.1.S1_at // GgaAffx.25386.2.S1_s_at // Gga.6529.1.S1_at
GO:0048518	P	positive regulation of biological process	53	486	1473	24599	6.6e-05	0.00031	// Gga.2965.1.S1_at // Gga.6387.1.S1_at // GgaAffx.968.3.S1_s_at // GgaAffx.12136.1.S1_s_at // Gga.9513.1.S2_at // Gga.2510.1.S1_at // Gga.11645.2.S1_a_at // Gga.1313.1.S1_s_at // Gga.1193.1.S1_at // Gga.9813.1.S1_at // GgaAffx.11387.1.S1_s_at // Gga.4458.1.S1_at // Gga.6529.1.S1_at // Gga.276.1.S1_at // Gga.12335.2.S1_s_at // GgaAffx.9789.1.S1_at // Gga.5396.1.S1_at // Gga.4330.1.S1_at // Gga.98…
GO:0050851	P	antigen receptor-mediated signaling pathway	5	486	23	24599	7.7e-05	0.00036	// Gga.1193.1.S1_at // Gga.4458.1.S1_at // GgaAffx.9789.1.S1_at // GgaAffx.968.3.S1_s_at // Gga.4350.1.S1_at
GO:0050863	P	regulation of T cell activation	7	486	53	24599	8.5e-05	0.00039	// GgaAffx.968.3.S1_s_at // Gga.4359.1.S1_s_at // Gga.723.1.S1_a_at // Gga.11016.1.S1_at // Gga.1193.1.S1_at // GgaAffx.11648.1.S1_at // GgaAffx.12646.1.S1_at
GO:0030574	P	collagen catabolic process	5	486	24	24599	9.6e-05	0.00043	// GgaAffx.25192.2.S1_s_at // Gga.198.1.S1_at // Gga.12800.1.S1_at // GgaAffx.11429.1.S1_s_at // GgaAffx.11018.1.S1_s_at
GO:0030595	P	leukocyte chemotaxis	5	486	24	24599	9.6e-05	0.00043	// GgaAffx.25386.2.S1_s_at // GgaAffx.25386.1.S1_at // Gga.566.1.S1_at // Gga.6529.1.S1_at // Gga.916.1.S1_at
GO:0060326	P	cell chemotaxis	5	486	24	24599	9.6e-05	0.00043	// GgaAffx.25386.2.S1_s_at // GgaAffx.25386.1.S1_at // Gga.566.1.S1_at // Gga.6529.1.S1_at // Gga.916.1.S1_at
GO:0006950	P	response to stress	51	486	1435	24599	0.00012	0.00051	// Gga.3027.1.S1_at // GgaAffx.11201.1.S1_s_at // GgaAffx.22748.1.S1_at // Gga.2510.1.S1_at // Gga.11645.2.S1_a_at // GgaAffx.7251.1.S1_at // GgaAffx.10876.2.S1_s_at // Gga.4884.1.S1_at // Gga.1193.1.S1_at // GgaAffx.9165.1.A1_x_at // Gga.6529.1.S1_at // Gga.6713.1.S1_at // GgaAffx.12703.1.S1_at // GgaAffx.9789.1.S1_at // Gga.16589.1.S1_at // Gga.9873.1.S1_at // GgaAffx.1625.1.S1_s_at // Gga.7539…
GO:0044243	P	multicellular organismal catabolic process	5	486	27	24599	0.00017	0.00075	// GgaAffx.25192.2.S1_s_at // Gga.198.1.S1_at // Gga.12800.1.S1_at // GgaAffx.11429.1.S1_s_at // GgaAffx.11018.1.S1_s_at
GO:0002541	P	activation of plasma proteins involved in acute inflammatory response	6	486	42	24599	0.00018	0.00075	// GgaAffx.1625.1.S1_s_at // Gga.2510.1.S1_at // Gga.11645.2.S1_a_at // GgaAffx.2960.1.S1_s_at // Gga.9873.1.S1_at // Gga.7298.1.S1_at
GO:0006956	P	complement activation	6	486	42	24599	0.00018	0.00075	// GgaAffx.1625.1.S1_s_at // Gga.2510.1.S1_at // Gga.11645.2.S1_a_at // GgaAffx.2960.1.S1_s_at // Gga.9873.1.S1_at // Gga.7298.1.S1_at
GO:0008283	P	cell proliferation	36	486	924	24599	0.00019	0.00079	// Gga.2965.1.S1_at // Gga.6387.1.S1_at // GgaAffx.968.3.S1_s_at // GgaAffx.6712.2.S1_s_at // Gga.3548.1.S1_at // Gga.3027.1.S1_at // Gga.4328.1.S1_at // Gga.1193.1.S1_at // Gga.4954.2.S1_a_at // GgaAffx.11387.1.S1_s_at // Gga.4458.1.S1_at // Gga.6713.1.S1_at // GgaAffx.4780.1.S1_at // Gga.4330.1.S1_at // GgaAffx.9461.1.S1_at // GgaAffx.21790.1.S1_s_at // GgaAffx.25386.2.S1_s_at // GgaAffx.11648.…
GO:0008219	P	cell death	33	486	829	24599	0.00023	0.00094	// Gga.3027.1.S1_at // Gga.4359.1.S1_s_at // GgaAffx.12136.1.S1_s_at // Gga.998.2.S1_a_at // Gga.1247.1.S2_at // Gga.11830.1.S1_at // Gga.5164.1.S2_at // Gga.4954.2.S1_a_at // Gga.1193.1.S1_at // Gga.6529.1.S1_at // Gga.6713.1.S1_at // Gga.16589.1.S1_at // Gga.7057.1.S1_at // Gga.9179.1.S1_at // Gga.9103.1.S1_at // GgaAffx.1027.1.S1_at // Gga.19934.1.S1_at // GgaAffx.11885.1.S1_s_at // GgaAffx.11…
GO:0016265	P	death	33	486	829	24599	0.00023	0.00094	// Gga.3027.1.S1_at // Gga.4359.1.S1_s_at // GgaAffx.12136.1.S1_s_at // Gga.998.2.S1_a_at // Gga.1247.1.S2_at // Gga.11830.1.S1_at // Gga.5164.1.S2_at // Gga.4954.2.S1_a_at // Gga.1193.1.S1_at // Gga.6529.1.S1_at // Gga.6713.1.S1_at // Gga.16589.1.S1_at // Gga.7057.1.S1_at // Gga.9179.1.S1_at // Gga.9103.1.S1_at // GgaAffx.1027.1.S1_at // Gga.19934.1.S1_at // GgaAffx.11885.1.S1_s_at // GgaAffx.11…
GO:0006968	P	cellular defense response	5	486	29	24599	0.00025	0.001	// GgaAffx.7251.1.S1_at // GgaAffx.7589.1.S1_at // GgaAffx.5322.1.S1_at // Gga.16589.1.S1_at // GgaAffx.9789.1.S1_at
GO:0009617	P	response to bacterium	8	486	84	24599	0.00028	0.0011	// Gga.713.1.S1_at // Gga.9103.1.S1_at // Gga.916.1.S1_at // Gga.7148.2.A1_at // GgaAffx.3425.1.S1_at // Gga.6529.1.S1_at // GgaAffx.22378.1.S1_s_at // Gga.7148.1.S1_at
GO:0051707	P	response to other organism	10	486	129	24599	0.00028	0.0011	// Gga.713.1.S1_at // Gga.9103.1.S1_at // GgaAffx.10617.2.S1_s_at // Gga.916.1.S1_at // Gga.7148.2.A1_at // Gga.1193.1.S1_at // GgaAffx.3425.1.S1_at // Gga.6529.1.S1_at // GgaAffx.22378.1.S1_s_at // Gga.7148.1.S1_at
GO:0030218	P	erythrocyte differentiation	6	486	48	24599	0.00037	0.0015	// GgaAffx.1032.1.S1_s_at // Gga.9541.1.S1_at // Gga.1313.1.S1_s_at // Gga.4954.2.S1_a_at // Gga.2603.1.S1_at // GgaAffx.11648.1.S1_at
GO:0034101	P	erythrocyte homeostasis	6	486	48	24599	0.00037	0.0015	// GgaAffx.1032.1.S1_s_at // Gga.9541.1.S1_at // Gga.1313.1.S1_s_at // Gga.4954.2.S1_a_at // Gga.2603.1.S1_at // GgaAffx.11648.1.S1_at
GO:0007626	P	locomotory behavior	14	486	239	24599	0.00038	0.0015	// Gga.16589.1.S1_at // Gga.6387.1.S1_at // Gga.9133.1.S1_at // Gga.916.1.S1_at // GgaAffx.25386.1.S1_at // Gga.566.1.S1_at // GgaAffx.7251.1.S1_at // Gga.296.1.S1_at // Gga.7100.1.S1_at // Gga.11456.1.S1_at // GgaAffx.25386.2.S1_s_at // Gga.6529.1.S1_at // Gga.1020.1.S1_at // GgaAffx.7589.1.S1_at
GO:0045619	P	regulation of lymphocyte differentiation	5	486	32	24599	0.0004	0.0015	// GgaAffx.11648.1.S1_at // Gga.11016.1.S1_at // GgaAffx.1032.1.S1_s_at // GgaAffx.968.3.S1_s_at // GgaAffx.12646.1.S1_at
GO:0031347	P	regulation of defense response	6	486	49	24599	0.00041	0.0016	// Gga.2510.1.S1_at // Gga.11645.2.S1_a_at // Gga.723.1.S1_a_at // GgaAffx.11648.1.S1_at // GgaAffx.10617.2.S1_s_at // Gga.6529.1.S1_at
GO:0002526	P	acute inflammatory response	8	486	90	24599	0.00045	0.0017	// GgaAffx.1625.1.S1_s_at // Gga.2510.1.S1_at // Gga.11645.2.S1_a_at // Gga.7298.1.S1_at // Gga.6529.1.S1_at // Gga.9873.1.S1_at // Gga.14571.1.S1_s_at // GgaAffx.2960.1.S1_s_at
GO:0051605	P	protein maturation by peptide bond cleavage	7	486	71	24599	0.00054	0.002	// Gga.6072.2.S1_at // GgaAffx.1625.1.S1_s_at // Gga.2510.1.S1_at // Gga.11645.2.S1_a_at // GgaAffx.2960.1.S1_s_at // Gga.9873.1.S1_at // Gga.7298.1.S1_at
GO:0006915	P	apoptosis	30	486	776	24599	0.00065	0.0024	// Gga.3027.1.S1_at // Gga.4359.1.S1_s_at // GgaAffx.12136.1.S1_s_at // Gga.998.2.S1_a_at // Gga.1247.1.S2_at // Gga.11830.1.S1_at // Gga.5164.1.S2_at // Gga.4954.2.S1_a_at // Gga.1193.1.S1_at // Gga.6529.1.S1_at // Gga.6713.1.S1_at // Gga.16589.1.S1_at // Gga.7057.1.S1_at // Gga.9179.1.S1_at // GgaAffx.1027.1.S1_at // Gga.19934.1.S1_at // GgaAffx.11885.1.S1_s_at // GgaAffx.11648.1.S1_at // Gga.1…
GO:0042221	P	response to chemical stimulus	34	486	924	24599	0.00072	0.0027	// Gga.2965.1.S1_at // Gga.10606.1.S1_at // Gga.7148.2.A1_at // Gga.566.1.S1_at // GgaAffx.7251.1.S1_at // Gga.918.1.S1_at // GgaAffx.26700.1.S1_s_at // Gga.6387.1.S1_at // Gga.6529.1.S1_at // Gga.16589.1.S1_at // Gga.9133.1.S1_at // GgaAffx.10393.1.S1_at // GgaAffx.7589.1.S1_at // GgaAffx.25534.1.S1_s_at // GgaAffx.9461.1.S1_at // GgaAffx.25386.2.S1_s_at // Gga.7148.1.S1_at // Gga.1020.1.S1_at /…
GO:0012501	P	programmed cell death	30	486	784	24599	0.00077	0.0028	// Gga.3027.1.S1_at // Gga.4359.1.S1_s_at // GgaAffx.12136.1.S1_s_at // Gga.998.2.S1_a_at // Gga.1247.1.S2_at // Gga.11830.1.S1_at // Gga.5164.1.S2_at // Gga.4954.2.S1_a_at // Gga.1193.1.S1_at // Gga.6529.1.S1_at // Gga.6713.1.S1_at // Gga.16589.1.S1_at // Gga.7057.1.S1_at // Gga.9179.1.S1_at // GgaAffx.1027.1.S1_at // Gga.19934.1.S1_at // GgaAffx.11885.1.S1_s_at // GgaAffx.11648.1.S1_at // Gga.1…
GO:0050727	P	regulation of inflammatory response	5	486	37	24599	0.00079	0.0029	// Gga.6529.1.S1_at // GgaAffx.11648.1.S1_at // Gga.11645.2.S1_a_at // Gga.2510.1.S1_at // Gga.723.1.S1_a_at
GO:0009967	P	positive regulation of signal transduction	11	486	174	24599	0.00081	0.0029	// Gga.2965.1.S1_at // GgaAffx.968.3.S1_s_at // GgaAffx.25386.1.S1_at // Gga.9541.1.S1_at // Gga.854.1.S1_a_at // Gga.9813.1.S1_at // GgaAffx.21790.1.S1_s_at // Gga.1193.1.S1_at // GgaAffx.25386.2.S1_s_at // Gga.4970.1.S1_at // GgaAffx.9789.1.S1_at
GO:0018108	P	peptidyl-tyrosine phosphorylation	6	486	56	24599	0.00085	0.003	// Gga.10606.1.S1_at // GgaAffx.968.3.S1_s_at // GgaAffx.9788.1.S1_at // Gga.9541.1.S1_at // Gga.9675.1.S1_at // Gga.4350.1.S1_at
GO:0018212	P	peptidyl-tyrosine modification	6	486	56	24599	0.00085	0.003	// Gga.10606.1.S1_at // GgaAffx.968.3.S1_s_at // GgaAffx.9788.1.S1_at // Gga.9541.1.S1_at // Gga.9675.1.S1_at // Gga.4350.1.S1_at
GO:0009607	P	response to biotic stimulus	11	486	181	24599	0.0011	0.0039	// Gga.713.1.S1_at // Gga.11337.1.S1_at // Gga.9103.1.S1_at // GgaAffx.10617.2.S1_s_at // Gga.916.1.S1_at // Gga.7148.2.A1_at // Gga.1193.1.S1_at // GgaAffx.3425.1.S1_at // Gga.6529.1.S1_at // GgaAffx.22378.1.S1_s_at // Gga.7148.1.S1_at
GO:0030099	P	myeloid cell differentiation	8	486	104	24599	0.0012	0.0041	// Gga.198.1.S1_at // GgaAffx.1032.1.S1_s_at // Gga.9541.1.S1_at // Gga.1313.1.S1_s_at // GgaAffx.7443.1.S1_at // Gga.4954.2.S1_a_at // Gga.2603.1.S1_at // GgaAffx.11648.1.S1_at
GO:0032101	P	regulation of response to external stimulus	7	486	82	24599	0.0013	0.0044	// Gga.6553.1.S1_at // Gga.2510.1.S1_at // Gga.11645.2.S1_a_at // Gga.723.1.S1_a_at // Gga.6529.1.S1_at // Gga.6713.1.S1_at // GgaAffx.11648.1.S1_at
GO:0042592	P	homeostatic process	26	486	670	24599	0.0013	0.0045	// Gga.2551.2.S1_s_at // Gga.4720.3.S1_a_at // Gga.1313.1.S1_s_at // GgaAffx.12860.1.S1_at // Gga.918.1.S1_at // Gga.4954.2.S1_a_at // Gga.1193.1.S1_at // Gga.6387.1.S1_at // Gga.6529.1.S1_at // Gga.6713.1.S1_at // GgaAffx.9461.1.S1_at // Gga.2603.1.S1_at // GgaAffx.11648.1.S1_at // Gga.1020.1.S1_at // Gga.916.1.S1_at // GgaAffx.1584.1.S1_at // Gga.701.1.S1_at // GgaAffx.7251.1.S1_at // GgaAffx.2…
GO:0042127	P	regulation of cell proliferation	23	486	571	24599	0.0015	0.0051	// Gga.2965.1.S1_at // Gga.6387.1.S1_at // GgaAffx.968.3.S1_s_at // Gga.3548.1.S1_at // Gga.4328.1.S1_at // GgaAffx.11387.1.S1_s_at // Gga.4954.2.S1_a_at // Gga.1193.1.S1_at // Gga.4330.1.S1_at // GgaAffx.21790.1.S1_s_at // GgaAffx.11648.1.S1_at // Gga.1020.1.S1_at // Gga.5171.1.S1_at // Gga.19099.2.S1_a_at // Gga.701.1.S1_at // Gga.723.1.S1_a_at // Gga.701.1.S1_s_at // Gga.4359.1.S1_s_at // Gga.…
GO:0042035	P	regulation of cytokine biosynthetic process	5	486	44	24599	0.0018	0.006	// GgaAffx.1032.1.S1_s_at // Gga.723.1.S1_a_at // GgaAffx.10617.2.S1_s_at // Gga.4374.1.S1_a_at // Gga.916.1.S1_at
GO:0010647	P	positive regulation of cell communication	11	486	197	24599	0.0022	0.0073	// Gga.2965.1.S1_at // GgaAffx.968.3.S1_s_at // GgaAffx.25386.1.S1_at // Gga.9541.1.S1_at // Gga.854.1.S1_a_at // Gga.9813.1.S1_at // GgaAffx.21790.1.S1_s_at // Gga.1193.1.S1_at // GgaAffx.25386.2.S1_s_at // Gga.4970.1.S1_at // GgaAffx.9789.1.S1_at
GO:0010033	P	response to organic substance	17	486	389	24599	0.0025	0.0083	// Gga.2965.1.S1_at // Gga.10606.1.S1_at // Gga.11337.1.S1_at // Gga.916.1.S1_at // Gga.540.1.S1_at // Gga.19.1.S1_at // GgaAffx.25534.1.S1_s_at // Gga.7148.2.A1_at // Gga.2073.1.S1_at // Gga.701.1.S1_at // Gga.9541.1.S1_at // GgaAffx.2960.1.S1_s_at // GgaAffx.26700.1.S1_s_at // GgaAffx.3425.1.S1_at // Gga.7148.1.S1_at // GgaAffx.22378.1.S1_s_at // Gga.4350.1.S1_at
GO:0048522	P	positive regulation of cellular process	43	486	1352	24599	0.0027	0.0091	// Gga.2965.1.S1_at // Gga.6387.1.S1_at // GgaAffx.968.3.S1_s_at // GgaAffx.12136.1.S1_s_at // Gga.9513.1.S2_at // Gga.2510.1.S1_at // Gga.1313.1.S1_s_at // Gga.1193.1.S1_at // Gga.9813.1.S1_at // Gga.12335.2.S1_s_at // GgaAffx.11387.1.S1_s_at // Gga.6529.1.S1_at // GgaAffx.12646.1.S1_at // GgaAffx.9789.1.S1_at // Gga.5396.1.S1_at // Gga.4330.1.S1_at // GgaAffx.9788.1.S1_at // Gga.9179.1.S1_at //…
GO:0051239	P	regulation of multicellular organismal process	26	486	713	24599	0.003	0.0099	// Gga.2965.1.S1_at // GgaAffx.968.3.S1_s_at // GgaAffx.10617.2.S1_s_at // Gga.3027.1.S1_at // Gga.4374.1.S1_a_at // Gga.918.1.S1_at // Gga.4954.2.S1_a_at // Gga.6529.1.S1_at // Gga.6713.1.S1_at // GgaAffx.12646.1.S1_at // Gga.1099.1.S1_at // Gga.2603.1.S1_at // GgaAffx.11648.1.S1_at // Gga.540.1.S1_at // Gga.916.1.S1_at // GgaAffx.21790.1.S1_s_at // Gga.723.1.S1_a_at // Gga.11016.1.S1_at // Gga.…
GO:0042089	P	cytokine biosynthetic process	5	486	52	24599	0.0037	0.012	// GgaAffx.1032.1.S1_s_at // Gga.723.1.S1_a_at // GgaAffx.10617.2.S1_s_at // Gga.4374.1.S1_a_at // Gga.916.1.S1_at
GO:0042107	P	cytokine metabolic process	5	486	53	24599	0.004	0.013	// GgaAffx.1032.1.S1_s_at // Gga.723.1.S1_a_at // GgaAffx.10617.2.S1_s_at // Gga.4374.1.S1_a_at // Gga.916.1.S1_at
GO:0007596	P	blood coagulation	7	486	101	24599	0.0042	0.013	// Gga.12516.1.S1_s_at // GgaAffx.13005.1.S1_at // GgaAffx.25229.1.S1_at // Gga.2510.1.S1_at // GgaAffx.25534.1.S1_s_at // Gga.3027.1.S1_at // GgaAffx.9461.1.S1_at
GO:0080134	P	regulation of response to stress	8	486	129	24599	0.0045	0.014	// Gga.6553.1.S1_at // Gga.2510.1.S1_at // Gga.11645.2.S1_a_at // Gga.723.1.S1_a_at // Gga.6529.1.S1_at // Gga.6713.1.S1_at // GgaAffx.11648.1.S1_at // GgaAffx.10617.2.S1_s_at
GO:0006817	P	phosphate transport	7	486	103	24599	0.0046	0.015	// Gga.2073.1.S1_at // Gga.888.1.S1_at // GgaAffx.25534.1.S1_s_at // GgaAffx.22999.1.S1_s_at // GgaAffx.2960.1.S1_s_at // Gga.9873.1.S1_at // Gga.7298.1.S1_at
GO:0046339	P	diacylglycerol metabolic process	5	486	55	24599	0.0047	0.015	// GgaAffx.3425.1.S1_at // Gga.7148.1.S1_at // GgaAffx.22378.1.S1_s_at // Gga.701.1.S1_at // Gga.7148.2.A1_at
GO:0007599	P	hemostasis	7	486	104	24599	0.0049	0.015	// Gga.12516.1.S1_s_at // GgaAffx.13005.1.S1_at // GgaAffx.25229.1.S1_at // Gga.2510.1.S1_at // GgaAffx.25534.1.S1_s_at // Gga.3027.1.S1_at // GgaAffx.9461.1.S1_at
GO:0019228	P	regulation of action potential in neuron	5	486	56	24599	0.0051	0.016	// Gga.6553.1.S1_at // Gga.6713.1.S1_at // Gga.918.1.S1_at // Gga.4350.1.S1_at // Gga.916.1.S1_at
GO:0050817	P	coagulation	7	486	105	24599	0.0051	0.016	// Gga.12516.1.S1_s_at // GgaAffx.13005.1.S1_at // GgaAffx.25229.1.S1_at // Gga.2510.1.S1_at // GgaAffx.25534.1.S1_s_at // Gga.3027.1.S1_at // GgaAffx.9461.1.S1_at
GO:0008284	P	positive regulation of cell proliferation	13	486	286	24599	0.0054	0.016	// Gga.4330.1.S1_at // Gga.6387.1.S1_at // GgaAffx.968.3.S1_s_at // Gga.4359.1.S1_s_at // Gga.2929.1.S1_at // Gga.9541.1.S1_at // Gga.701.1.S1_at // Gga.723.1.S1_a_at // Gga.380.1.S1_at // Gga.1193.1.S1_at // GgaAffx.11387.1.S1_s_at // GgaAffx.11648.1.S1_at // Gga.1020.1.S1_at
GO:0040011	P	locomotion	18	486	460	24599	0.0059	0.018	// Gga.16589.1.S1_at // Gga.6387.1.S1_at // Gga.9133.1.S1_at // Gga.916.1.S1_at // Gga.9513.1.S2_at // GgaAffx.25386.1.S1_at // Gga.566.1.S1_at // Gga.701.1.S1_at // GgaAffx.7251.1.S1_at // GgaAffx.9461.1.S1_at // Gga.296.1.S1_at // Gga.7100.1.S1_at // GgaAffx.21790.1.S1_s_at // GgaAffx.25386.2.S1_s_at // Gga.6529.1.S1_at // Gga.1020.1.S1_at // GgaAffx.7589.1.S1_at // Gga.4350.1.S1_at
GO:0051704	P	multi-organism process	12	486	263	24599	0.0071	0.021	// Gga.713.1.S1_at // Gga.916.1.S1_at // Gga.4988.2.S1_a_at // Gga.9103.1.S1_at // Gga.7148.2.A1_at // Gga.1193.1.S1_at // GgaAffx.3425.1.S1_at // Gga.7148.1.S1_at // Gga.6713.1.S1_at // GgaAffx.22378.1.S1_s_at // Gga.6529.1.S1_at // GgaAffx.10617.2.S1_s_at
GO:0016485	P	protein processing	7	486	112	24599	0.0072	0.022	// Gga.6072.2.S1_at // GgaAffx.1625.1.S1_s_at // Gga.2510.1.S1_at // Gga.11645.2.S1_a_at // GgaAffx.2960.1.S1_s_at // Gga.9873.1.S1_at // Gga.7298.1.S1_at
GO:0051604	P	protein maturation	7	486	114	24599	0.008	0.024	// Gga.6072.2.S1_at // GgaAffx.1625.1.S1_s_at // Gga.2510.1.S1_at // Gga.11645.2.S1_a_at // GgaAffx.2960.1.S1_s_at // Gga.9873.1.S1_at // Gga.7298.1.S1_at
GO:0051241	P	negative regulation of multicellular organismal process	6	486	88	24599	0.0083	0.024	// Gga.6072.2.S1_at // Gga.6553.1.S1_at // Gga.916.1.S1_at // GgaAffx.1032.1.S1_s_at // GgaAffx.11648.1.S1_at // Gga.6713.1.S1_at
GO:0050878	P	regulation of body fluid levels	7	486	123	24599	0.012	0.034	// Gga.12516.1.S1_s_at // GgaAffx.13005.1.S1_at // GgaAffx.25229.1.S1_at // Gga.2510.1.S1_at // GgaAffx.25534.1.S1_s_at // Gga.3027.1.S1_at // GgaAffx.9461.1.S1_at
GO:0006916	P	anti-apoptosis	7	486	129	24599	0.015	0.043	// Gga.3027.1.S1_at // Gga.4359.1.S1_s_at // Gga.9179.1.S1_at // Gga.4884.1.S1_at // Gga.5164.1.S1_at // Gga.4954.2.S1_a_at // Gga.19934.1.S1_at
GO:0007610	P	behavior	16	486	433	24599	0.015	0.043	// Gga.6553.1.S1_at // Gga.16589.1.S1_at // Gga.6713.1.S1_at // Gga.6387.1.S1_at // Gga.9133.1.S1_at // Gga.916.1.S1_at // GgaAffx.25386.1.S1_at // Gga.566.1.S1_at // GgaAffx.7251.1.S1_at // Gga.296.1.S1_at // Gga.7100.1.S1_at // Gga.11456.1.S1_at // GgaAffx.25386.2.S1_s_at // Gga.6529.1.S1_at // Gga.1020.1.S1_at // GgaAffx.7589.1.S1_at
GO:0001508	P	regulation of action potential	5	486	75	24599	0.017	0.048	// Gga.6553.1.S1_at // Gga.6713.1.S1_at // Gga.918.1.S1_at // Gga.4350.1.S1_at // Gga.916.1.S1_at
GO:0042060	P	wound healing	8	486	163	24599	0.017	0.048	// Gga.12516.1.S1_s_at // GgaAffx.13005.1.S1_at // GgaAffx.25229.1.S1_at // Gga.2510.1.S1_at // GgaAffx.25534.1.S1_s_at // Gga.3027.1.S1_at // GgaAffx.9461.1.S1_at // GgaAffx.21790.1.S1_s_at
GO:0042981	P	regulation of apoptosis	19	486	556	24599	0.018	0.05	// Gga.198.1.S1_at // Gga.3027.1.S1_at // Gga.7057.1.S1_at // Gga.4359.1.S1_s_at // Gga.9179.1.S1_at // GgaAffx.11885.1.S1_s_at // GgaAffx.12136.1.S1_s_at // GgaAffx.1027.1.S1_at // Gga.854.1.S1_a_at // Gga.723.1.S1_a_at // Gga.998.2.S1_a_at // Gga.5164.1.S1_at // Gga.5164.1.S2_at // Gga.4954.2.S1_a_at // Gga.19934.1.S1_at // Gga.1193.1.S1_at // Gga.4884.1.S1_at // Gga.6529.1.S1_at // GgaAffx.116…
GO:0010941	P	regulation of cell death	19	486	560	24599	0.019	0.053	// Gga.198.1.S1_at // Gga.3027.1.S1_at // Gga.7057.1.S1_at // Gga.4359.1.S1_s_at // Gga.9179.1.S1_at // GgaAffx.11885.1.S1_s_at // GgaAffx.12136.1.S1_s_at // GgaAffx.1027.1.S1_at // Gga.854.1.S1_a_at // Gga.723.1.S1_a_at // Gga.998.2.S1_a_at // Gga.5164.1.S1_at // Gga.5164.1.S2_at // Gga.4954.2.S1_a_at // Gga.19934.1.S1_at // Gga.1193.1.S1_at // Gga.4884.1.S1_at // Gga.6529.1.S1_at // GgaAffx.116…
GO:0043067	P	regulation of programmed cell death	19	486	560	24599	0.019	0.053	// Gga.198.1.S1_at // Gga.3027.1.S1_at // Gga.7057.1.S1_at // Gga.4359.1.S1_s_at // Gga.9179.1.S1_at // GgaAffx.11885.1.S1_s_at // GgaAffx.12136.1.S1_s_at // GgaAffx.1027.1.S1_at // Gga.854.1.S1_a_at // Gga.723.1.S1_a_at // Gga.998.2.S1_a_at // Gga.5164.1.S1_at // Gga.5164.1.S2_at // Gga.4954.2.S1_a_at // Gga.19934.1.S1_at // Gga.1193.1.S1_at // Gga.4884.1.S1_at // Gga.6529.1.S1_at // GgaAffx.116…
GO:0006638	P	neutral lipid metabolic process	5	486	84	24599	0.026	0.071	// GgaAffx.3425.1.S1_at // Gga.7148.1.S1_at // GgaAffx.22378.1.S1_s_at // Gga.701.1.S1_at // Gga.7148.2.A1_at
GO:0006639	P	acylglycerol metabolic process	5	486	84	24599	0.026	0.071	// GgaAffx.3425.1.S1_at // Gga.7148.1.S1_at // GgaAffx.22378.1.S1_s_at // Gga.701.1.S1_at // Gga.7148.2.A1_at
GO:0007242	P	intracellular signaling cascade	52	486	1949	24599	0.026	0.071	// GgaAffx.3477.1.S1_at // Gga.2965.1.S1_at // GgaAffx.13005.1.S1_at // Gga.10606.1.S1_at // GgaAffx.968.3.S1_s_at // Gga.4113.1.S1_at // GgaAffx.11885.1.S1_s_at // GgaAffx.11590.1.S1_s_at // Gga.8164.1.S1_a_at // GgaAffx.7443.1.S1_at // GgaAffx.7251.1.S1_at // GgaAffx.11861.1.S1_at // Gga.9813.1.S1_at // GgaAffx.26700.1.S1_s_at // Gga.6387.1.S1_at // Gga.12335.2.S1_s_at // GgaAffx.4780.1.S1_at /…
GO:0007243	P	protein kinase cascade	15	486	427	24599	0.026	0.071	// Gga.2965.1.S1_at // Gga.10606.1.S1_at // GgaAffx.968.3.S1_s_at // GgaAffx.4393.3.S1_s_at // GgaAffx.11771.1.S1_at // Gga.9179.1.S1_at // Gga.9541.1.S1_at // Gga.854.1.S1_a_at // Gga.1193.1.S2_at // Gga.9813.1.S1_at // GgaAffx.21790.1.S1_s_at // GgaAffx.2373.1.S1_s_at // GgaAffx.4780.1.S1_at // GgaAffx.5597.1.S1_at // GgaAffx.22748.1.S1_at
GO:0006662	P	glycerol ether metabolic process	5	486	86	24599	0.029	0.077	// GgaAffx.3425.1.S1_at // Gga.7148.1.S1_at // GgaAffx.22378.1.S1_s_at // Gga.701.1.S1_at // Gga.7148.2.A1_at
GO:0018904	P	organic ether metabolic process	5	486	86	24599	0.029	0.077	// GgaAffx.3425.1.S1_at // Gga.7148.1.S1_at // GgaAffx.22378.1.S1_s_at // Gga.701.1.S1_at // Gga.7148.2.A1_at
GO:0050801	P	ion homeostasis	14	486	405	24599	0.034	0.092	// Gga.6553.1.S1_at // Gga.6713.1.S1_at // Gga.2551.2.S1_s_at // Gga.916.1.S1_at // GgaAffx.1584.1.S1_at // Gga.9541.1.S1_at // Gga.2551.2.S1_a_at // Gga.918.1.S1_at // GgaAffx.7251.1.S1_at // GgaAffx.1584.2.S1_s_at // Gga.1193.1.S1_at // GgaAffx.26700.1.S1_s_at // Gga.1020.1.S1_at // Gga.4350.1.S1_at
GO:0048513	P	organ development	45	486	1693	24599	0.037	0.097	// Gga.3027.1.S1_at // GgaAffx.968.3.S1_s_at // Gga.998.2.S1_a_at // GgaAffx.11885.1.S1_s_at // GgaAffx.21283.1.S1_at // GgaAffx.7443.1.S1_at // Gga.1313.1.S1_s_at // Gga.4954.2.S1_a_at // Gga.1193.1.S1_at // Gga.4458.1.S1_at // Gga.11456.1.S1_at // GgaAffx.12646.1.S1_at // GgaAffx.24185.1.S1_at // GgaAffx.25229.1.S1_at // GgaAffx.25534.1.S1_s_at // GgaAffx.8515.1.S1_at // GgaAffx.9461.1.S1_at //…
GO:0051049	P	regulation of transport	10	486	261	24599	0.038	0.099	// Gga.6072.2.S1_at // Gga.12120.1.S1_at // Gga.3027.1.S1_at // Gga.916.1.S1_at // Gga.2510.1.S1_at // Gga.9541.1.S1_at // Gga.701.1.S1_at // GgaAffx.26700.1.S1_s_at // Gga.6529.1.S1_at // GgaAffx.9789.1.S1_at
GO:0043066	P	negative regulation of apoptosis	9	486	233	24599	0.045	0.11	// Gga.3027.1.S1_at // Gga.4359.1.S1_s_at // Gga.9179.1.S1_at // Gga.4884.1.S1_at // Gga.5164.1.S1_at // Gga.4954.2.S1_a_at // Gga.19934.1.S1_at // Gga.6529.1.S1_at // GgaAffx.11648.1.S1_at
GO:0043069	P	negative regulation of programmed cell death	9	486	233	24599	0.045	0.11	// Gga.3027.1.S1_at // Gga.4359.1.S1_s_at // Gga.9179.1.S1_at // Gga.4884.1.S1_at // Gga.5164.1.S1_at // Gga.4954.2.S1_a_at // Gga.19934.1.S1_at // Gga.6529.1.S1_at // GgaAffx.11648.1.S1_at
GO:0060548	P	negative regulation of cell death	9	486	233	24599	0.045	0.11	// Gga.3027.1.S1_at // Gga.4359.1.S1_s_at // Gga.9179.1.S1_at // Gga.4884.1.S1_at // Gga.5164.1.S1_at // Gga.4954.2.S1_a_at // Gga.19934.1.S1_at // Gga.6529.1.S1_at // GgaAffx.11648.1.S1_at
GO:0065008	P	regulation of biological quality	39	486	1459	24599	0.045	0.11	// Gga.3027.1.S1_at // GgaAffx.13005.1.S1_at // Gga.10606.1.S1_at // Gga.2510.1.S1_at // Gga.4720.3.S1_a_at // Gga.1313.1.S1_s_at // GgaAffx.12860.1.S1_at // Gga.918.1.S1_at // Gga.4954.2.S1_a_at // Gga.1193.1.S1_at // Gga.2551.2.S1_s_at // Gga.6529.1.S1_at // Gga.6713.1.S1_at // Gga.12516.1.S1_s_at // GgaAffx.25229.1.S1_at // Gga.13442.1.S1_at // GgaAffx.25534.1.S1_s_at // GgaAffx.9461.1.S1_at /…
GO:0009966	P	regulation of signal transduction	25	486	876	24599	0.05	0.13	// Gga.2965.1.S1_at // GgaAffx.11861.1.S1_at // Gga.10606.1.S1_at // GgaAffx.968.3.S1_s_at // GgaAffx.11590.1.S1_s_at // Gga.9813.1.S1_at // Gga.1193.1.S1_at // Gga.12335.2.S1_s_at // Gga.4970.1.S1_at // GgaAffx.9789.1.S1_at // GgaAffx.9971.2.S1_s_at // GgaAffx.3442.2.S1_s_at // GgaAffx.12720.1.S1_at // GgaAffx.21790.1.S1_s_at // GgaAffx.25386.2.S1_s_at // GgaAffx.11648.1.S1_at // Gga.1287.1.S1_a…
GO:0045596	P	negative regulation of cell differentiation	6	486	136	24599	0.055	0.14	// Gga.6553.1.S1_at // GgaAffx.1032.1.S1_s_at // Gga.1313.1.S1_s_at // Gga.2603.1.S1_at // GgaAffx.11648.1.S1_at // Gga.6713.1.S1_at
GO:0046165	P	alcohol biosynthetic process	5	486	103	24599	0.055	0.14	// GgaAffx.3425.1.S1_at // Gga.7148.1.S1_at // GgaAffx.22378.1.S1_s_at // Gga.3676.1.S1_at // Gga.7148.2.A1_at
GO:0032879	P	regulation of localization	13	486	398	24599	0.058	0.14	// Gga.6072.2.S1_at // Gga.12120.1.S1_at // Gga.3027.1.S1_at // Gga.916.1.S1_at // Gga.9513.1.S2_at // Gga.2510.1.S1_at // Gga.9541.1.S1_at // Gga.701.1.S1_at // Gga.1193.1.S1_at // GgaAffx.26700.1.S1_s_at // Gga.6529.1.S1_at // GgaAffx.11648.1.S1_at // GgaAffx.9789.1.S1_at
GO:0009395	P	phospholipid catabolic process	6	486	139	24599	0.06	0.15	// Gga.7148.2.A1_at // Gga.2589.1.S1_at // GgaAffx.7420.1.S1_at // GgaAffx.3425.1.S1_at // Gga.7148.1.S1_at // GgaAffx.22378.1.S1_s_at
GO:0010740	P	positive regulation of protein kinase cascade	5	486	106	24599	0.06	0.15	// Gga.2965.1.S1_at // GgaAffx.21790.1.S1_s_at // Gga.9813.1.S1_at // Gga.854.1.S1_a_at // Gga.9541.1.S1_at
GO:0006873	P	cellular ion homeostasis	12	486	363	24599	0.062	0.15	// Gga.6553.1.S1_at // Gga.6713.1.S1_at // Gga.2551.2.S1_s_at // Gga.916.1.S1_at // Gga.9541.1.S1_at // Gga.2551.2.S1_a_at // Gga.918.1.S1_at // GgaAffx.7251.1.S1_at // Gga.1193.1.S1_at // GgaAffx.26700.1.S1_s_at // Gga.1020.1.S1_at // Gga.4350.1.S1_at
GO:0010646	P	regulation of cell communication	28	486	1031	24599	0.066	0.16	// Gga.2965.1.S1_at // GgaAffx.11861.1.S1_at // Gga.10606.1.S1_at // GgaAffx.968.3.S1_s_at // GgaAffx.11590.1.S1_s_at // Gga.9813.1.S1_at // Gga.1193.1.S1_at // Gga.4970.1.S1_at // Gga.6713.1.S1_at // Gga.12335.2.S1_s_at // GgaAffx.9789.1.S1_at // GgaAffx.9971.2.S1_s_at // GgaAffx.3442.2.S1_s_at // GgaAffx.12720.1.S1_at // GgaAffx.21790.1.S1_s_at // GgaAffx.25386.2.S1_s_at // GgaAffx.11648.1.S1_a…
GO:0018193	P	peptidyl-amino acid modification	6	486	143	24599	0.066	0.16	// Gga.10606.1.S1_at // GgaAffx.968.3.S1_s_at // GgaAffx.9788.1.S1_at // Gga.9541.1.S1_at // Gga.9675.1.S1_at // Gga.4350.1.S1_at
GO:0019932	P	second-messenger-mediated signaling	16	486	527	24599	0.066	0.16	// GgaAffx.3477.1.S1_at // GgaAffx.24611.2.S1_s_at // GgaAffx.968.3.S1_s_at // Gga.1092.1.S1_s_at // GgaAffx.11885.1.S1_s_at // GgaAffx.7589.1.S1_at // GgaAffx.13005.1.S1_at // GgaAffx.6562.1.A1_at // GgaAffx.10808.1.S1_at // GgaAffx.7251.1.S1_at // Gga.4970.1.S1_at // GgaAffx.6562.1.S1_at // GgaAffx.10807.1.S1_at // Gga.9880.1.S1_at // GgaAffx.9789.1.S1_at // Gga.10465.1.S1_s_at
GO:0051046	P	regulation of secretion	6	486	143	24599	0.066	0.16	// Gga.6072.2.S1_at // Gga.3027.1.S1_at // Gga.916.1.S1_at // Gga.701.1.S1_at // GgaAffx.26700.1.S1_s_at // Gga.6529.1.S1_at
GO:0055082	P	cellular chemical homeostasis	12	486	368	24599	0.067	0.16	// Gga.6553.1.S1_at // Gga.6713.1.S1_at // Gga.2551.2.S1_s_at // Gga.916.1.S1_at // Gga.9541.1.S1_at // Gga.2551.2.S1_a_at // Gga.918.1.S1_at // GgaAffx.7251.1.S1_at // Gga.1193.1.S1_at // GgaAffx.26700.1.S1_s_at // Gga.1020.1.S1_at // Gga.4350.1.S1_at
GO:0008285	P	negative regulation of cell proliferation	9	486	253	24599	0.068	0.16	// Gga.2965.1.S1_at // Gga.3548.1.S1_at // GgaAffx.1032.1.S1_s_at // Gga.701.1.S1_at // Gga.4328.1.S1_at // Gga.4954.2.S1_a_at // GgaAffx.21790.1.S1_s_at // GgaAffx.11648.1.S1_at // Gga.5171.1.S1_at
GO:0006928	P	cellular component movement	16	486	531	24599	0.069	0.16	// Gga.16589.1.S1_at // Gga.916.1.S1_at // Gga.9513.1.S2_at // GgaAffx.25386.1.S1_at // Gga.566.1.S1_at // Gga.701.1.S1_at // GgaAffx.7251.1.S1_at // Gga.4884.1.S1_at // Gga.1009.2.S1_s_at // GgaAffx.9461.1.S1_at // GgaAffx.21790.1.S1_s_at // Gga.1009.1.S1_s_at // GgaAffx.25386.2.S1_s_at // Gga.6529.1.S1_at // GgaAffx.11648.1.S1_at // Gga.4350.1.S1_at
GO:0070887	P	cellular response to chemical stimulus	6	486	146	24599	0.072	0.17	// Gga.566.1.S1_at // Gga.10606.1.S1_at // Gga.916.1.S1_at // GgaAffx.25386.1.S1_at // GgaAffx.25386.2.S1_s_at // Gga.6529.1.S1_at
GO:0051336	P	regulation of hydrolase activity	16	486	536	24599	0.073	0.17	// GgaAffx.26385.1.S1_s_at // Gga.18469.1.S1_s_at // GgaAffx.11771.1.S1_at // GgaAffx.12720.1.S1_at // GgaAffx.25386.1.S1_at // GgaAffx.3442.2.S1_s_at // Gga.701.1.S1_at // Gga.7788.1.S1_at // Gga.701.1.S1_s_at // GgaAffx.12136.1.S1_s_at // GgaAffx.26702.1.S1_s_at // GgaAffx.12948.1.S1_s_at // GgaAffx.25386.2.S1_s_at // Gga.12335.2.S1_s_at // GgaAffx.23145.3.S1_s_at // GgaAffx.11648.1.S1_at
GO:0045597	P	positive regulation of cell differentiation	6	486	151	24599	0.081	0.19	// Gga.2965.1.S1_at // GgaAffx.968.3.S1_s_at // GgaAffx.1032.1.S1_s_at // Gga.11016.1.S1_at // Gga.4954.2.S1_a_at // GgaAffx.12646.1.S1_at
GO:0019725	P	cellular homeostasis	14	486	465	24599	0.085	0.2	// Gga.6553.1.S1_at // Gga.6713.1.S1_at // Gga.2551.2.S1_s_at // Gga.916.1.S1_at // Gga.4720.3.S1_a_at // Gga.9541.1.S1_at // Gga.2551.2.S1_a_at // GgaAffx.12860.1.S1_at // Gga.918.1.S1_at // GgaAffx.7251.1.S1_at // Gga.1193.1.S1_at // GgaAffx.26700.1.S1_s_at // Gga.1020.1.S1_at // Gga.4350.1.S1_at
GO:0032269	P	negative regulation of cellular protein metabolic process	5	486	118	24599	0.086	0.2	// Gga.701.1.S1_s_at // Gga.2965.1.S1_at // Gga.10606.1.S1_at // Gga.701.1.S1_at // Gga.703.1.S1_at
GO:0043087	P	regulation of GTPase activity	12	486	385	24599	0.086	0.2	// GgaAffx.26385.1.S1_s_at // Gga.18469.1.S1_s_at // GgaAffx.11771.1.S1_at // GgaAffx.12720.1.S1_at // GgaAffx.25386.1.S1_at // GgaAffx.3442.2.S1_s_at // GgaAffx.26702.1.S1_s_at // GgaAffx.12948.1.S1_s_at // GgaAffx.25386.2.S1_s_at // Gga.12335.2.S1_s_at // GgaAffx.23145.3.S1_s_at // GgaAffx.11648.1.S1_at
GO:0045595	P	regulation of cell differentiation	11	486	347	24599	0.089	0.2	// Gga.6553.1.S1_at // Gga.2965.1.S1_at // GgaAffx.968.3.S1_s_at // GgaAffx.1032.1.S1_s_at // Gga.1313.1.S1_s_at // Gga.11016.1.S1_at // Gga.4954.2.S1_a_at // Gga.2603.1.S1_at // GgaAffx.11648.1.S1_at // Gga.6713.1.S1_at // GgaAffx.12646.1.S1_at
GO:0048878	P	chemical homeostasis	14	486	471	24599	0.091	0.21	// Gga.6553.1.S1_at // Gga.6713.1.S1_at // Gga.2551.2.S1_s_at // Gga.916.1.S1_at // GgaAffx.1584.1.S1_at // Gga.9541.1.S1_at // Gga.2551.2.S1_a_at // Gga.918.1.S1_at // GgaAffx.7251.1.S1_at // GgaAffx.1584.2.S1_s_at // Gga.1193.1.S1_at // GgaAffx.26700.1.S1_s_at // Gga.1020.1.S1_at // Gga.4350.1.S1_at
GO:0040008	P	regulation of growth	9	486	272	24599	0.095	0.21	// Gga.10606.1.S1_at // Gga.916.1.S1_at // GgaAffx.11258.2.S1_s_at // Gga.4328.1.S1_at // GgaAffx.11258.1.S1_s_at // GgaAffx.26700.1.S1_s_at // GgaAffx.11648.1.S1_at // Gga.578.1.S1_at // Gga.6064.3.S1_a_at
GO:0051248	P	negative regulation of protein metabolic process	5	486	123	24599	0.099	0.22	// Gga.701.1.S1_s_at // Gga.2965.1.S1_at // Gga.10606.1.S1_at // Gga.701.1.S1_at // Gga.703.1.S1_at
GO:0051129	P	negative regulation of cellular component organization	5	486	124	24599	0.1	0.23	// Gga.4451.1.S1_at // Gga.12120.1.S1_at // Gga.6713.1.S1_at // Gga.13442.1.S1_at // Gga.6553.1.S1_at
GO:0055080	P	cation homeostasis	9	486	276	24599	0.1	0.23	// Gga.2551.2.S1_s_at // GgaAffx.1584.1.S1_at // Gga.9541.1.S1_at // Gga.2551.2.S1_a_at // GgaAffx.7251.1.S1_at // GgaAffx.1584.2.S1_s_at // Gga.1193.1.S1_at // GgaAffx.26700.1.S1_s_at // Gga.1020.1.S1_at
GO:0034637	P	cellular carbohydrate biosynthetic process	5	486	127	24599	0.11	0.24	// GgaAffx.3425.1.S1_at // Gga.7148.1.S1_at // GgaAffx.22378.1.S1_s_at // Gga.3676.1.S1_at // Gga.7148.2.A1_at
GO:0042391	P	regulation of membrane potential	5	486	128	24599	0.11	0.24	// Gga.6553.1.S1_at // Gga.6713.1.S1_at // Gga.918.1.S1_at // Gga.4350.1.S1_at // Gga.916.1.S1_at
GO:0050954	P	sensory perception of mechanical stimulus	6	486	165	24599	0.11	0.24	// Gga.2073.1.S1_at // GgaAffx.21283.1.S1_at // Gga.540.1.S1_at // GgaAffx.22999.1.S1_s_at // Gga.19934.1.S1_at // Gga.4350.1.S1_at
GO:0051056	P	regulation of small GTPase mediated signal transduction	12	486	417	24599	0.13	0.28	// Gga.2965.1.S1_at // GgaAffx.11861.1.S1_at // GgaAffx.3442.2.S1_s_at // Gga.1287.1.S1_at // GgaAffx.25386.1.S1_at // GgaAffx.11771.1.S1_at // GgaAffx.12720.1.S1_at // GgaAffx.12948.1.S1_s_at // GgaAffx.25386.2.S1_s_at // Gga.12335.2.S1_s_at // GgaAffx.11648.1.S1_at // GgaAffx.11590.1.S1_s_at
GO:0060341	P	regulation of cellular localization	6	486	172	24599	0.13	0.28	// Gga.6072.2.S1_at // Gga.3027.1.S1_at // Gga.916.1.S1_at // Gga.701.1.S1_at // GgaAffx.26700.1.S1_s_at // Gga.6529.1.S1_at
GO:0032940	P	secretion by cell	9	486	295	24599	0.14	0.29	// Gga.6072.2.S1_at // Gga.3027.1.S1_at // Gga.916.1.S1_at // Gga.4359.1.S1_s_at // Gga.701.1.S1_at // Gga.9541.1.S1_at // GgaAffx.26700.1.S1_s_at // Gga.6529.1.S1_at // Gga.236.1.S1_at
GO:0030005	P	cellular di-, tri-valent inorganic cation homeostasis	7	486	217	24599	0.14	0.31	// Gga.2551.2.S1_s_at // Gga.9541.1.S1_at // Gga.2551.2.S1_a_at // GgaAffx.7251.1.S1_at // Gga.1193.1.S1_at // GgaAffx.26700.1.S1_s_at // Gga.1020.1.S1_at
GO:0007187	P	G-protein signaling, coupled to cyclic nucleotide second messenger	12	486	429	24599	0.15	0.31	// GgaAffx.3477.1.S1_at // GgaAffx.24611.2.S1_s_at // Gga.1092.1.S1_s_at // GgaAffx.10807.1.S1_at // GgaAffx.7589.1.S1_at // GgaAffx.13005.1.S1_at // GgaAffx.6562.1.A1_at // GgaAffx.10808.1.S1_at // GgaAffx.7251.1.S1_at // GgaAffx.6562.1.S1_at // Gga.9880.1.S1_at // Gga.10465.1.S1_s_at
GO:0009725	P	response to hormone stimulus	7	486	219	24599	0.15	0.31	// Gga.2073.1.S1_at // Gga.10606.1.S1_at // Gga.19.1.S1_at // Gga.540.1.S1_at // Gga.701.1.S1_at // Gga.9541.1.S1_at // GgaAffx.2960.1.S1_s_at
GO:0016477	P	cell migration	10	486	342	24599	0.15	0.31	// Gga.566.1.S1_at // Gga.916.1.S1_at // Gga.9513.1.S2_at // GgaAffx.25386.1.S1_at // Gga.701.1.S1_at // GgaAffx.9461.1.S1_at // GgaAffx.21790.1.S1_s_at // GgaAffx.25386.2.S1_s_at // Gga.6529.1.S1_at // Gga.4350.1.S1_at
GO:0048519	P	negative regulation of biological process	35	486	1454	24599	0.15	0.31	// Gga.2965.1.S1_at // Gga.10606.1.S1_at // Gga.3548.1.S1_at // Gga.3027.1.S1_at // Gga.1313.1.S1_s_at // Gga.4328.1.S1_at // Gga.4954.2.S1_a_at // Gga.1193.1.S1_at // Gga.6529.1.S1_at // Gga.6713.1.S1_at // GgaAffx.9789.1.S1_at // Gga.12120.1.S1_at // Gga.13442.1.S1_at // Gga.9179.1.S1_at // GgaAffx.25534.1.S1_s_at // Gga.19934.1.S1_at // Gga.2603.1.S1_at // GgaAffx.11648.1.S1_at // Gga.5171.1.S…
GO:0055066	P	di-, tri-valent inorganic cation homeostasis	7	486	220	24599	0.15	0.31	// Gga.2551.2.S1_s_at // Gga.9541.1.S1_at // Gga.2551.2.S1_a_at // GgaAffx.7251.1.S1_at // Gga.1193.1.S1_at // GgaAffx.26700.1.S1_s_at // Gga.1020.1.S1_at
GO:0010627	P	regulation of protein kinase cascade	6	486	183	24599	0.16	0.32	// Gga.2965.1.S1_at // Gga.10606.1.S1_at // Gga.9541.1.S1_at // Gga.854.1.S1_a_at // Gga.9813.1.S1_at // GgaAffx.21790.1.S1_s_at
GO:0046903	P	secretion	10	486	348	24599	0.16	0.32	// Gga.6072.2.S1_at // Gga.3027.1.S1_at // Gga.916.1.S1_at // Gga.4359.1.S1_s_at // Gga.701.1.S1_at // Gga.4884.1.S1_at // Gga.9541.1.S1_at // GgaAffx.26700.1.S1_s_at // Gga.6529.1.S1_at // Gga.236.1.S1_at
GO:0048523	P	negative regulation of cellular process	33	486	1371	24599	0.16	0.32	// Gga.2965.1.S1_at // Gga.10606.1.S1_at // Gga.3548.1.S1_at // Gga.3027.1.S1_at // Gga.1313.1.S1_s_at // Gga.4328.1.S1_at // Gga.4954.2.S1_a_at // Gga.1193.1.S1_at // Gga.6529.1.S1_at // Gga.6713.1.S1_at // GgaAffx.9789.1.S1_at // Gga.12120.1.S1_at // Gga.13442.1.S1_at // Gga.9179.1.S1_at // Gga.19934.1.S1_at // Gga.2603.1.S1_at // GgaAffx.11648.1.S1_at // Gga.5171.1.S1_at // Gga.5528.1.S1_at //…
GO:0031589	P	cell-substrate adhesion	7	486	224	24599	0.16	0.33	// Gga.566.1.S1_at // GgaAffx.25229.1.S1_at // Gga.7539.1.S1_at // GgaAffx.25534.1.S1_s_at // GgaAffx.9461.1.S1_at // GgaAffx.11648.1.S1_at // GgaAffx.9008.1.S1_s_at
GO:0015698	P	inorganic anion transport	7	486	227	24599	0.17	0.34	// Gga.2073.1.S1_at // Gga.888.1.S1_at // GgaAffx.25534.1.S1_s_at // GgaAffx.22999.1.S1_s_at // GgaAffx.2960.1.S1_s_at // Gga.9873.1.S1_at // Gga.7298.1.S1_at
GO:0007166	P	cell surface receptor linked signaling pathway	40	486	1712	24599	0.17	0.35	// GgaAffx.3477.1.S1_at // Gga.236.1.S1_at // Gga.10606.1.S1_at // GgaAffx.968.3.S1_s_at // Gga.7148.2.A1_at // GgaAffx.6712.2.S1_s_at // Gga.2510.1.S1_at // Gga.11645.2.S1_a_at // GgaAffx.7251.1.S1_at // Gga.1193.1.S1_at // Gga.4458.1.S1_at // Gga.6529.1.S1_at // GgaAffx.9789.1.S1_at // Gga.5927.1.S1_at // GgaAffx.24185.1.S1_at // GgaAffx.9971.2.S1_s_at // Gga.7539.1.S1_at // Gga.1092.1.S1_s_at …
GO:0009628	P	response to abiotic stimulus	8	486	273	24599	0.18	0.36	// Gga.540.1.S1_at // GgaAffx.25534.1.S1_s_at // Gga.2073.1.S1_at // Gga.871.1.S1_at // GgaAffx.9461.1.S1_at // GgaAffx.21790.1.S1_s_at // Gga.19934.1.S1_at // Gga.4350.1.S1_at
GO:0009719	P	response to endogenous stimulus	7	486	232	24599	0.18	0.36	// Gga.2073.1.S1_at // Gga.10606.1.S1_at // Gga.19.1.S1_at // Gga.540.1.S1_at // Gga.701.1.S1_at // Gga.9541.1.S1_at // GgaAffx.2960.1.S1_s_at
GO:0019935	P	cyclic-nucleotide-mediated signaling	12	486	446	24599	0.18	0.36	// GgaAffx.3477.1.S1_at // GgaAffx.24611.2.S1_s_at // Gga.1092.1.S1_s_at // GgaAffx.10807.1.S1_at // GgaAffx.7589.1.S1_at // GgaAffx.13005.1.S1_at // GgaAffx.6562.1.A1_at // GgaAffx.10808.1.S1_at // GgaAffx.7251.1.S1_at // GgaAffx.6562.1.S1_at // Gga.9880.1.S1_at // Gga.10465.1.S1_s_at
GO:0046578	P	regulation of Ras protein signal transduction	9	486	318	24599	0.18	0.37	// Gga.2965.1.S1_at // GgaAffx.3442.2.S1_s_at // GgaAffx.12720.1.S1_at // GgaAffx.25386.1.S1_at // GgaAffx.11771.1.S1_at // GgaAffx.25386.2.S1_s_at // GgaAffx.11648.1.S1_at // Gga.12335.2.S1_s_at // GgaAffx.11590.1.S1_s_at
GO:0006310	P	DNA recombination	5	486	152	24599	0.19	0.37	// Gga.3027.1.S1_at // Gga.723.1.S1_a_at // GgaAffx.8515.1.S1_at // GgaAffx.11648.1.S1_at // Gga.916.1.S1_at
GO:0007264	P	small GTPase mediated signal transduction	16	486	630	24599	0.19	0.37	// Gga.2965.1.S1_at // GgaAffx.11861.1.S1_at // Gga.4113.1.S1_at // Gga.6387.1.S1_at // GgaAffx.11771.1.S1_at // Gga.1287.1.S1_at // Gga.3154.1.S1_at // GgaAffx.25386.1.S1_at // Gga.8164.1.S1_a_at // GgaAffx.3442.2.S1_s_at // GgaAffx.12948.1.S1_s_at // GgaAffx.25386.2.S1_s_at // Gga.12335.2.S1_s_at // GgaAffx.12720.1.S1_at // GgaAffx.11648.1.S1_at // GgaAffx.11590.1.S1_s_at
GO:0016051	P	carbohydrate biosynthetic process	6	486	194	24599	0.19	0.37	// Gga.7148.2.A1_at // GgaAffx.26768.1.S1_s_at // Gga.3676.1.S1_at // GgaAffx.3425.1.S1_at // Gga.7148.1.S1_at // GgaAffx.22378.1.S1_s_at
GO:0030003	P	cellular cation homeostasis	7	486	235	24599	0.19	0.37	// Gga.2551.2.S1_s_at // Gga.9541.1.S1_at // Gga.2551.2.S1_a_at // GgaAffx.7251.1.S1_at // Gga.1193.1.S1_at // GgaAffx.26700.1.S1_s_at // Gga.1020.1.S1_at
GO:0030036	P	actin cytoskeleton organization	9	486	320	24599	0.19	0.37	// Gga.6387.1.S1_at // Gga.13442.1.S1_at // Gga.4451.1.S1_at // Gga.3154.1.S1_at // GgaAffx.25386.1.S1_at // Gga.701.1.S1_at // GgaAffx.10876.2.S1_s_at // GgaAffx.25386.2.S1_s_at // GgaAffx.11648.1.S1_at
GO:0048731	P	system development	52	486	2300	24599	0.19	0.38	// Gga.2965.1.S1_at // GgaAffx.968.3.S1_s_at // Gga.998.2.S1_a_at // GgaAffx.11885.1.S1_s_at // GgaAffx.21283.1.S1_at // GgaAffx.7443.1.S1_at // Gga.1313.1.S1_s_at // Gga.4954.2.S1_a_at // Gga.1193.1.S1_at // Gga.4458.1.S1_at // Gga.11456.1.S1_at // Gga.6713.1.S1_at // GgaAffx.12646.1.S1_at // GgaAffx.24185.1.S1_at // GgaAffx.25229.1.S1_at // GgaAffx.25534.1.S1_s_at // GgaAffx.8515.1.S1_at // Gga…
GO:0048870	P	cell motility	10	486	366	24599	0.19	0.38	// Gga.566.1.S1_at // Gga.916.1.S1_at // Gga.9513.1.S2_at // GgaAffx.25386.1.S1_at // Gga.701.1.S1_at // GgaAffx.9461.1.S1_at // GgaAffx.21790.1.S1_s_at // GgaAffx.25386.2.S1_s_at // Gga.6529.1.S1_at // Gga.4350.1.S1_at
GO:0000902	P	cell morphogenesis	11	486	413	24599	0.2	0.39	// Gga.6553.1.S1_at // Gga.998.2.S1_a_at // Gga.3154.1.S1_at // GgaAffx.25386.1.S1_at // GgaAffx.21790.1.S1_s_at // Gga.19934.1.S1_at // GgaAffx.25386.2.S1_s_at // GgaAffx.11648.1.S1_at // Gga.6713.1.S1_at // GgaAffx.21283.1.S1_at // Gga.4350.1.S1_at
GO:0006874	P	cellular calcium ion homeostasis	5	486	157	24599	0.2	0.39	// Gga.1193.1.S1_at // GgaAffx.26700.1.S1_s_at // Gga.1020.1.S1_at // Gga.9541.1.S1_at // GgaAffx.7251.1.S1_at
GO:0007605	P	sensory perception of sound	5	486	160	24599	0.21	0.4	// GgaAffx.22999.1.S1_s_at // Gga.2073.1.S1_at // Gga.540.1.S1_at // GgaAffx.21283.1.S1_at // Gga.19934.1.S1_at
GO:0044242	P	cellular lipid catabolic process	6	486	201	24599	0.21	0.4	// Gga.7148.2.A1_at // Gga.2589.1.S1_at // GgaAffx.7420.1.S1_at // GgaAffx.3425.1.S1_at // Gga.7148.1.S1_at // GgaAffx.22378.1.S1_s_at
GO:0055074	P	calcium ion homeostasis	5	486	159	24599	0.21	0.4	// Gga.1193.1.S1_at // GgaAffx.26700.1.S1_s_at // Gga.1020.1.S1_at // Gga.9541.1.S1_at // GgaAffx.7251.1.S1_at
GO:0006820	P	anion transport	8	486	288	24599	0.22	0.4	// Gga.2073.1.S1_at // Gga.888.1.S1_at // GgaAffx.25534.1.S1_s_at // GgaAffx.22999.1.S1_s_at // GgaAffx.2960.1.S1_s_at // Gga.9873.1.S1_at // GgaAffx.5539.1.S1_s_at // Gga.7298.1.S1_at
GO:0030029	P	actin filament-based process	9	486	334	24599	0.22	0.41	// Gga.6387.1.S1_at // Gga.13442.1.S1_at // Gga.4451.1.S1_at // Gga.3154.1.S1_at // GgaAffx.25386.1.S1_at // Gga.701.1.S1_at // GgaAffx.10876.2.S1_s_at // GgaAffx.25386.2.S1_s_at // GgaAffx.11648.1.S1_at
GO:0034641	P	cellular nitrogen compound metabolic process	11	486	423	24599	0.22	0.41	// GgaAffx.378.1.S1_at // GgaAffx.22748.1.S1_at // Gga.9179.1.S1_at // GgaAffx.9971.2.S1_s_at // GgaAffx.6712.2.S1_s_at // Gga.6017.1.S1_s_at // GgaAffx.26700.1.S1_s_at // Gga.1193.1.S1_at // GgaAffx.8757.1.S1_at // GgaAffx.5597.1.S1_at // GgaAffx.23872.1.S1_at
GO:0006468	P	protein amino acid phosphorylation	22	486	932	24599	0.23	0.43	// Gga.10606.1.S1_at // GgaAffx.968.3.S1_s_at // GgaAffx.6712.2.S1_s_at // GgaAffx.11885.1.S1_s_at // Gga.1193.1.S2_at // Gga.6964.1.S1_at // GgaAffx.6712.1.S1_at // GgaAffx.22748.1.S1_at // Gga.8329.1.S1_at // GgaAffx.9788.1.S1_at // Gga.9179.1.S1_at // Gga.606.1.S1_at // GgaAffx.11653.1.S1_s_at // GgaAffx.2373.1.S1_s_at // Gga.9675.1.S1_at // GgaAffx.9971.2.S1_s_at // GgaAffx.26700.1.S1_s_at //…
GO:0040007	P	growth	12	486	474	24599	0.24	0.43	// Gga.10606.1.S1_at // Gga.916.1.S1_at // Gga.19.1.S1_at // GgaAffx.21790.1.S1_s_at // GgaAffx.11258.2.S1_s_at // Gga.4328.1.S1_at // GgaAffx.11258.1.S1_s_at // Gga.9675.1.S1_at // GgaAffx.26700.1.S1_s_at // GgaAffx.11648.1.S1_at // Gga.578.1.S1_at // Gga.6064.3.S1_a_at
GO:0006875	P	cellular metal ion homeostasis	5	486	167	24599	0.24	0.44	// Gga.1193.1.S1_at // GgaAffx.26700.1.S1_s_at // Gga.1020.1.S1_at // Gga.9541.1.S1_at // GgaAffx.7251.1.S1_at
GO:0030154	P	cell differentiation	34	486	1500	24599	0.24	0.44	// Gga.2965.1.S1_at // Gga.10606.1.S1_at // GgaAffx.968.3.S1_s_at // Gga.998.2.S1_a_at // GgaAffx.21283.1.S1_at // Gga.3027.1.S1_at // Gga.1313.1.S1_s_at // Gga.4954.2.S1_a_at // Gga.1193.1.S1_at // Gga.4458.1.S1_at // Gga.11456.1.S1_at // Gga.6713.1.S1_at // GgaAffx.12646.1.S1_at // Gga.19934.1.S1_at // Gga.2603.1.S1_at // GgaAffx.11648.1.S1_at // Gga.198.1.S1_at // Gga.540.1.S1_at // GgaAffx.25…
GO:0055065	P	metal ion homeostasis	5	486	169	24599	0.24	0.45	// Gga.1193.1.S1_at // GgaAffx.26700.1.S1_s_at // Gga.1020.1.S1_at // Gga.9541.1.S1_at // GgaAffx.7251.1.S1_at
GO:0048856	P	anatomical structure development	55	486	2505	24599	0.25	0.45	// Gga.2965.1.S1_at // GgaAffx.968.3.S1_s_at // Gga.998.2.S1_a_at // GgaAffx.11885.1.S1_s_at // GgaAffx.21283.1.S1_at // GgaAffx.7443.1.S1_at // Gga.1313.1.S1_s_at // Gga.4954.2.S1_a_at // Gga.1193.1.S1_at // Gga.4458.1.S1_at // Gga.11456.1.S1_at // Gga.6713.1.S1_at // GgaAffx.12646.1.S1_at // GgaAffx.24185.1.S1_at // GgaAffx.25229.1.S1_at // GgaAffx.25534.1.S1_s_at // GgaAffx.8515.1.S1_at // Gga…
GO:0007160	P	cell-matrix adhesion	6	486	219	24599	0.27	0.48	// Gga.566.1.S1_at // Gga.7539.1.S1_at // GgaAffx.25534.1.S1_s_at // GgaAffx.9461.1.S1_at // GgaAffx.11648.1.S1_at // GgaAffx.9008.1.S1_s_at
GO:0043065	P	positive regulation of apoptosis	7	486	263	24599	0.27	0.48	// Gga.198.1.S1_at // GgaAffx.12136.1.S1_s_at // Gga.9179.1.S1_at // GgaAffx.11885.1.S1_s_at // Gga.723.1.S1_a_at // Gga.1193.1.S1_at // GgaAffx.11648.1.S1_at
GO:0050790	P	regulation of catalytic activity	21	486	910	24599	0.27	0.49	// GgaAffx.26385.1.S1_s_at // Gga.2965.1.S1_at // Gga.18469.1.S1_s_at // Gga.10606.1.S1_at // Gga.1193.1.S1_at // GgaAffx.11771.1.S1_at // GgaAffx.6712.2.S1_s_at // GgaAffx.25386.1.S1_at // GgaAffx.3442.2.S1_s_at // Gga.701.1.S1_at // Gga.7788.1.S1_at // Gga.701.1.S1_s_at // GgaAffx.12136.1.S1_s_at // Gga.1193.1.S2_at // GgaAffx.26702.1.S1_s_at // GgaAffx.12948.1.S1_s_at // GgaAffx.25386.2.S1_s_a…
GO:0006508	P	proteolysis	20	486	867	24599	0.28	0.49	// Gga.6072.2.S1_at // Gga.12120.1.S1_at // Gga.2965.1.S1_at // GgaAffx.11018.1.S1_s_at // Gga.11865.1.S1_at // GgaAffx.1625.1.S1_s_at // Gga.198.1.S1_at // GgaAffx.25192.2.S1_s_at // Gga.2510.1.S1_at // GgaAffx.8628.1.S1_at // Gga.11645.2.S1_a_at // Gga.9873.1.S1_at // Gga.6553.1.S1_at // Gga.3145.3.S1_a_at // Gga.12800.1.S1_at // GgaAffx.11429.1.S1_s_at // Gga.19289.1.S1_at // Gga.7298.1.S1_at …
GO:0009893	P	positive regulation of metabolic process	16	486	679	24599	0.28	0.49	// Gga.4359.1.S1_s_at // Gga.1313.1.S1_s_at // GgaAffx.20792.1.S1_s_at // Gga.916.1.S1_at // GgaAffx.9788.1.S1_at // Gga.9541.1.S1_at // Gga.701.1.S1_at // Gga.723.1.S1_a_at // Gga.4954.2.S1_a_at // GgaAffx.21790.1.S1_s_at // Gga.2603.1.S1_at // Gga.4374.1.S1_a_at // Gga.578.1.S1_at // GgaAffx.10617.2.S1_s_at // Gga.276.1.S1_at // Gga.5396.1.S1_at
GO:0010942	P	positive regulation of cell death	7	486	266	24599	0.28	0.49	// Gga.198.1.S1_at // GgaAffx.12136.1.S1_s_at // Gga.9179.1.S1_at // GgaAffx.11885.1.S1_s_at // Gga.723.1.S1_a_at // Gga.1193.1.S1_at // GgaAffx.11648.1.S1_at
GO:0043068	P	positive regulation of programmed cell death	7	486	266	24599	0.28	0.49	// Gga.198.1.S1_at // GgaAffx.12136.1.S1_s_at // Gga.9179.1.S1_at // GgaAffx.11885.1.S1_s_at // Gga.723.1.S1_a_at // Gga.1193.1.S1_at // GgaAffx.11648.1.S1_at
GO:0006644	P	phospholipid metabolic process	7	486	273	24599	0.3	0.52	// Gga.7148.2.A1_at // Gga.2589.1.S1_at // GgaAffx.7420.1.S1_at // GgaAffx.3425.1.S1_at // Gga.7148.1.S1_at // GgaAffx.22378.1.S1_s_at // GgaAffx.4938.1.S1_at
GO:0001558	P	regulation of cell growth	5	486	185	24599	0.31	0.53	// GgaAffx.11648.1.S1_at // Gga.4328.1.S1_at // Gga.10606.1.S1_at // Gga.6064.3.S1_a_at // Gga.916.1.S1_at
GO:0007155	P	cell adhesion	21	486	938	24599	0.32	0.55	// Gga.540.1.S1_at // Gga.7149.1.S1_at // Gga.9768.1.S1_at // Gga.888.1.S1_at // Gga.7539.1.S1_at // GgaAffx.12136.1.S1_s_at // GgaAffx.25229.1.S1_at // GgaAffx.7589.1.S1_at // GgaAffx.25534.1.S1_s_at // Gga.566.1.S1_at // Gga.3027.1.S1_at // Gga.11828.1.S1_at // Gga.4999.2.S1_at // GgaAffx.9461.1.S1_at // GgaAffx.1557.1.S1_at // GgaAffx.21771.1.S1_at // Gga.12335.2.S1_s_at // Gga.2582.1.S1_at //…
GO:0010605	P	negative regulation of macromolecule metabolic process	13	486	561	24599	0.32	0.55	// Gga.2965.1.S1_at // Gga.10606.1.S1_at // GgaAffx.20792.1.S1_s_at // GgaAffx.1032.1.S1_s_at // Gga.701.1.S1_at // Gga.1313.1.S1_s_at // Gga.703.1.S1_at // Gga.701.1.S1_s_at // GgaAffx.9789.1.S1_at // Gga.19934.1.S1_at // GgaAffx.11648.1.S1_at // Gga.578.1.S1_at // Gga.5528.1.S1_at
GO:0022610	P	biological adhesion	21	486	938	24599	0.32	0.55	// Gga.540.1.S1_at // Gga.7149.1.S1_at // Gga.9768.1.S1_at // Gga.888.1.S1_at // Gga.7539.1.S1_at // GgaAffx.12136.1.S1_s_at // GgaAffx.25229.1.S1_at // GgaAffx.7589.1.S1_at // GgaAffx.25534.1.S1_s_at // Gga.566.1.S1_at // Gga.3027.1.S1_at // Gga.11828.1.S1_at // Gga.4999.2.S1_at // GgaAffx.9461.1.S1_at // GgaAffx.1557.1.S1_at // GgaAffx.21771.1.S1_at // Gga.12335.2.S1_s_at // Gga.2582.1.S1_at //…
GO:0048869	P	cellular developmental process	35	486	1614	24599	0.32	0.55	// Gga.2965.1.S1_at // Gga.10606.1.S1_at // GgaAffx.968.3.S1_s_at // Gga.998.2.S1_a_at // GgaAffx.21283.1.S1_at // Gga.3027.1.S1_at // Gga.1313.1.S1_s_at // Gga.4954.2.S1_a_at // Gga.1193.1.S1_at // Gga.4458.1.S1_at // Gga.11456.1.S1_at // Gga.6713.1.S1_at // GgaAffx.12646.1.S1_at // Gga.4884.1.S1_at // Gga.19934.1.S1_at // Gga.2603.1.S1_at // GgaAffx.11648.1.S1_at // Gga.198.1.S1_at // Gga.540.1…
GO:0007186	P	G-protein coupled receptor protein signaling pathway	17	486	754	24599	0.33	0.56	// GgaAffx.3477.1.S1_at // GgaAffx.9971.2.S1_s_at // GgaAffx.24611.2.S1_s_at // Gga.5927.1.S1_at // GgaAffx.6712.2.S1_s_at // GgaAffx.6562.1.S1_at // GgaAffx.7589.1.S1_at // GgaAffx.13005.1.S1_at // GgaAffx.6562.1.A1_at // Gga.9880.1.S1_at // Gga.1092.1.S1_s_at // GgaAffx.10808.1.S1_at // GgaAffx.7251.1.S1_at // Gga.1020.1.S1_at // GgaAffx.10807.1.S1_at // Gga.2510.1.S1_at // Gga.10465.1.S1_s_at
GO:0019637	P	organophosphate metabolic process	7	486	282	24599	0.33	0.56	// Gga.7148.2.A1_at // Gga.2589.1.S1_at // GgaAffx.7420.1.S1_at // GgaAffx.3425.1.S1_at // Gga.7148.1.S1_at // GgaAffx.22378.1.S1_s_at // GgaAffx.4938.1.S1_at
GO:0032535	P	regulation of cellular component size	7	486	283	24599	0.33	0.56	// Gga.10606.1.S1_at // Gga.13442.1.S1_at // Gga.4451.1.S1_at // Gga.916.1.S1_at // Gga.4328.1.S1_at // GgaAffx.11648.1.S1_at // Gga.6064.3.S1_a_at
GO:0007265	P	Ras protein signal transduction	9	486	380	24599	0.34	0.57	// Gga.2965.1.S1_at // GgaAffx.3442.2.S1_s_at // GgaAffx.12720.1.S1_at // GgaAffx.25386.1.S1_at // GgaAffx.11771.1.S1_at // GgaAffx.25386.2.S1_s_at // GgaAffx.11648.1.S1_at // Gga.12335.2.S1_s_at // GgaAffx.11590.1.S1_s_at
GO:0015674	P	di-, tri-valent inorganic cation transport	7	486	286	24599	0.34	0.57	// Gga.198.1.S1_at // Gga.2551.2.S1_s_at // Gga.9541.1.S1_at // Gga.2551.2.S1_a_at // Gga.1099.1.S1_at // Gga.1193.1.S1_at // GgaAffx.26700.1.S1_s_at
GO:0016042	P	lipid catabolic process	6	486	240	24599	0.34	0.57	// Gga.7148.2.A1_at // Gga.2589.1.S1_at // GgaAffx.7420.1.S1_at // GgaAffx.3425.1.S1_at // Gga.7148.1.S1_at // GgaAffx.22378.1.S1_s_at
GO:0022411	P	cellular component disassembly	5	486	193	24599	0.34	0.57	// Gga.4451.1.S1_at // Gga.11830.1.S1_at // Gga.6713.1.S1_at // GgaAffx.12136.1.S1_s_at // Gga.13442.1.S1_at
GO:0031324	P	negative regulation of cellular metabolic process	13	486	568	24599	0.34	0.57	// Gga.2965.1.S1_at // Gga.10606.1.S1_at // GgaAffx.20792.1.S1_s_at // GgaAffx.1032.1.S1_s_at // Gga.701.1.S1_at // Gga.1313.1.S1_s_at // Gga.703.1.S1_at // Gga.701.1.S1_s_at // GgaAffx.9789.1.S1_at // Gga.19934.1.S1_at // GgaAffx.11648.1.S1_at // Gga.578.1.S1_at // Gga.5528.1.S1_at
GO:0090066	P	regulation of anatomical structure size	8	486	334	24599	0.34	0.57	// Gga.10606.1.S1_at // Gga.13442.1.S1_at // Gga.4451.1.S1_at // Gga.916.1.S1_at // Gga.4328.1.S1_at // Gga.918.1.S1_at // GgaAffx.11648.1.S1_at // Gga.6064.3.S1_a_at
GO:0006917	P	induction of apoptosis	5	486	196	24599	0.35	0.57	// Gga.9179.1.S1_at // GgaAffx.11885.1.S1_s_at // GgaAffx.12136.1.S1_s_at // Gga.1193.1.S1_at // Gga.723.1.S1_a_at
GO:0012502	P	induction of programmed cell death	5	486	197	24599	0.35	0.58	// Gga.9179.1.S1_at // GgaAffx.11885.1.S1_s_at // GgaAffx.12136.1.S1_s_at // Gga.1193.1.S1_at // Gga.723.1.S1_a_at
GO:0065007	P	biological regulation	157	486	7684	24599	0.37	0.61	// GgaAffx.3477.1.S1_at // GgaAffx.21436.1.S1_s_at // Gga.998.2.S1_a_at // Gga.9513.1.S2_at // Gga.4720.3.S1_a_at // GgaAffx.7443.1.S1_at // Gga.4374.1.S1_a_at // GgaAffx.12860.1.S1_at // Gga.918.1.S1_at // GgaAffx.23767.1.S1_at // Gga.4954.2.S1_a_at // GgaAffx.11387.1.S1_s_at // Gga.4371.1.S1_s_at // Gga.6529.1.S1_at // GgaAffx.9789.1.S1_at // GgaAffx.26385.1.S1_s_at // Gga.12120.1.S1_at // Gga.…
GO:0010604	P	positive regulation of macromolecule metabolic process	14	486	634	24599	0.38	0.61	// Gga.4359.1.S1_s_at // GgaAffx.20792.1.S1_s_at // Gga.916.1.S1_at // GgaAffx.9788.1.S1_at // Gga.9541.1.S1_at // Gga.1313.1.S1_s_at // Gga.723.1.S1_a_at // Gga.4954.2.S1_a_at // GgaAffx.21790.1.S1_s_at // Gga.2603.1.S1_at // Gga.4374.1.S1_a_at // Gga.578.1.S1_at // GgaAffx.10617.2.S1_s_at // Gga.276.1.S1_at
GO:0065009	P	regulation of molecular function	21	486	974	24599	0.38	0.61	// GgaAffx.26385.1.S1_s_at // Gga.2965.1.S1_at // Gga.18469.1.S1_s_at // Gga.10606.1.S1_at // Gga.1193.1.S1_at // GgaAffx.11771.1.S1_at // GgaAffx.6712.2.S1_s_at // GgaAffx.25386.1.S1_at // GgaAffx.3442.2.S1_s_at // Gga.701.1.S1_at // Gga.7788.1.S1_at // Gga.701.1.S1_s_at // GgaAffx.12136.1.S1_s_at // Gga.1193.1.S2_at // GgaAffx.26702.1.S1_s_at // GgaAffx.12948.1.S1_s_at // GgaAffx.25386.2.S1_s_a…
GO:0010558	P	negative regulation of macromolecule biosynthetic process	10	486	443	24599	0.38	0.62	// GgaAffx.20792.1.S1_s_at // GgaAffx.1032.1.S1_s_at // Gga.701.1.S1_at // Gga.1313.1.S1_s_at // Gga.703.1.S1_at // Gga.701.1.S1_s_at // Gga.19934.1.S1_at // GgaAffx.11648.1.S1_at // Gga.578.1.S1_at // Gga.5528.1.S1_at
GO:0032989	P	cellular component morphogenesis	11	486	491	24599	0.38	0.62	// Gga.6553.1.S1_at // Gga.998.2.S1_a_at // Gga.3154.1.S1_at // GgaAffx.25386.1.S1_at // GgaAffx.21790.1.S1_s_at // Gga.19934.1.S1_at // GgaAffx.25386.2.S1_s_at // GgaAffx.11648.1.S1_at // Gga.6713.1.S1_at // GgaAffx.21283.1.S1_at // Gga.4350.1.S1_at
GO:0007275	P	multicellular organismal development	59	486	2849	24599	0.39	0.62	// Gga.2965.1.S1_at // GgaAffx.968.3.S1_s_at // Gga.998.2.S1_a_at // GgaAffx.11885.1.S1_s_at // GgaAffx.21283.1.S1_at // GgaAffx.7443.1.S1_at // Gga.1313.1.S1_s_at // Gga.4954.2.S1_a_at // Gga.1193.1.S1_at // Gga.4458.1.S1_at // Gga.11456.1.S1_at // Gga.6713.1.S1_at // GgaAffx.12646.1.S1_at // GgaAffx.24185.1.S1_at // GgaAffx.25229.1.S1_at // GgaAffx.25534.1.S1_s_at // GgaAffx.8515.1.S1_at // Gga…
GO:0009892	P	negative regulation of metabolic process	13	486	591	24599	0.39	0.62	// Gga.2965.1.S1_at // Gga.10606.1.S1_at // GgaAffx.20792.1.S1_s_at // GgaAffx.1032.1.S1_s_at // Gga.701.1.S1_at // Gga.1313.1.S1_s_at // Gga.703.1.S1_at // Gga.701.1.S1_s_at // GgaAffx.9789.1.S1_at // Gga.19934.1.S1_at // GgaAffx.11648.1.S1_at // Gga.578.1.S1_at // Gga.5528.1.S1_at
GO:0009968	P	negative regulation of signal transduction	5	486	206	24599	0.39	0.62	// Gga.1193.1.S1_at // Gga.2965.1.S1_at // GgaAffx.1032.1.S1_s_at // Gga.10606.1.S1_at // GgaAffx.11648.1.S1_at
GO:0050789	P	regulation of biological process	148	486	7289	24599	0.4	0.63	// GgaAffx.3477.1.S1_at // GgaAffx.21436.1.S1_s_at // Gga.998.2.S1_a_at // Gga.9513.1.S2_at // Gga.4720.3.S1_a_at // GgaAffx.7443.1.S1_at // Gga.4374.1.S1_a_at // GgaAffx.12860.1.S1_at // Gga.918.1.S1_at // GgaAffx.23767.1.S1_at // Gga.4954.2.S1_a_at // GgaAffx.11387.1.S1_s_at // Gga.4371.1.S1_s_at // Gga.6529.1.S1_at // GgaAffx.9789.1.S1_at // GgaAffx.26385.1.S1_s_at // Gga.12120.1.S1_at // Gga.…
GO:0051128	P	regulation of cellular component organization	10	486	449	24599	0.4	0.63	// Gga.12120.1.S1_at // Gga.6713.1.S1_at // Gga.13442.1.S1_at // Gga.4451.1.S1_at // Gga.3154.1.S1_at // Gga.2510.1.S1_at // Gga.6553.1.S1_at // Gga.6529.1.S1_at // Gga.723.1.S1_a_at // Gga.4350.1.S1_at
GO:0016049	P	cell growth	5	486	211	24599	0.41	0.64	// GgaAffx.11648.1.S1_at // Gga.4328.1.S1_at // Gga.10606.1.S1_at // Gga.6064.3.S1_a_at // Gga.916.1.S1_at
GO:0022603	P	regulation of anatomical structure morphogenesis	5	486	211	24599	0.41	0.64	// Gga.6553.1.S1_at // GgaAffx.26700.1.S1_s_at // Gga.6713.1.S1_at // Gga.4350.1.S1_at // Gga.3154.1.S1_at
GO:0006816	P	calcium ion transport	5	486	214	24599	0.42	0.65	// Gga.1193.1.S1_at // Gga.198.1.S1_at // GgaAffx.26700.1.S1_s_at // Gga.9541.1.S1_at // Gga.1099.1.S1_at
GO:0008361	P	regulation of cell size	5	486	217	24599	0.43	0.66	// GgaAffx.11648.1.S1_at // Gga.4328.1.S1_at // Gga.10606.1.S1_at // Gga.6064.3.S1_a_at // Gga.916.1.S1_at
GO:0031327	P	negative regulation of cellular biosynthetic process	10	486	460	24599	0.43	0.66	// GgaAffx.20792.1.S1_s_at // GgaAffx.1032.1.S1_s_at // Gga.701.1.S1_at // Gga.1313.1.S1_s_at // Gga.703.1.S1_at // Gga.701.1.S1_s_at // Gga.19934.1.S1_at // GgaAffx.11648.1.S1_at // Gga.578.1.S1_at // Gga.5528.1.S1_at
GO:0070838	P	divalent metal ion transport	5	486	217	24599	0.43	0.66	// Gga.1193.1.S1_at // Gga.198.1.S1_at // GgaAffx.26700.1.S1_s_at // Gga.9541.1.S1_at // Gga.1099.1.S1_at
GO:0009890	P	negative regulation of biosynthetic process	10	486	463	24599	0.43	0.67	// GgaAffx.20792.1.S1_s_at // GgaAffx.1032.1.S1_s_at // Gga.701.1.S1_at // Gga.1313.1.S1_s_at // Gga.703.1.S1_at // Gga.701.1.S1_s_at // Gga.19934.1.S1_at // GgaAffx.11648.1.S1_at // Gga.578.1.S1_at // Gga.5528.1.S1_at
GO:0042325	P	regulation of phosphorylation	8	486	368	24599	0.44	0.68	// Gga.10606.1.S1_at // GgaAffx.9788.1.S1_at // GgaAffx.6712.2.S1_s_at // Gga.9541.1.S1_at // Gga.701.1.S1_at // Gga.1193.1.S2_at // Gga.9675.1.S1_at // Gga.1193.1.S1_at
GO:0001501	P	skeletal system development	6	486	272	24599	0.45	0.69	// Gga.6072.2.S1_at // Gga.198.1.S1_at // Gga.2073.1.S1_at // Gga.540.1.S1_at // GgaAffx.22999.1.S1_s_at // Gga.3199.1.S1_at
GO:0031325	P	positive regulation of cellular metabolic process	14	486	667	24599	0.45	0.69	// Gga.1313.1.S1_s_at // GgaAffx.20792.1.S1_s_at // Gga.916.1.S1_at // GgaAffx.9788.1.S1_at // Gga.9541.1.S1_at // Gga.701.1.S1_at // Gga.723.1.S1_a_at // Gga.4954.2.S1_a_at // Gga.2603.1.S1_at // Gga.4374.1.S1_a_at // Gga.578.1.S1_at // GgaAffx.10617.2.S1_s_at // Gga.276.1.S1_at // Gga.5396.1.S1_at
GO:0044057	P	regulation of system process	6	486	272	24599	0.45	0.69	// Gga.6553.1.S1_at // Gga.916.1.S1_at // GgaAffx.21790.1.S1_s_at // Gga.918.1.S1_at // Gga.1099.1.S1_at // Gga.6713.1.S1_at
GO:0019220	P	regulation of phosphate metabolic process	8	486	377	24599	0.47	0.71	// Gga.10606.1.S1_at // GgaAffx.9788.1.S1_at // GgaAffx.6712.2.S1_s_at // Gga.9541.1.S1_at // Gga.701.1.S1_at // Gga.1193.1.S2_at // Gga.9675.1.S1_at // Gga.1193.1.S1_at
GO:0032501	P	multicellular organismal process	77	486	3838	24599	0.47	0.71	// Gga.2965.1.S1_at // GgaAffx.13005.1.S1_at // Gga.6387.1.S1_at // GgaAffx.968.3.S1_s_at // Gga.998.2.S1_a_at // GgaAffx.11885.1.S1_s_at // Gga.2510.1.S1_at // GgaAffx.7443.1.S1_at // Gga.1313.1.S1_s_at // Gga.918.1.S1_at // GgaAffx.11429.1.S1_s_at // GgaAffx.21017.1.S1_s_at // Gga.1193.1.S1_at // Gga.4458.1.S1_at // Gga.6529.1.S1_at // Gga.6713.1.S1_at // GgaAffx.12646.1.S1_at // GgaAffx.24185.…
GO:0051174	P	regulation of phosphorus metabolic process	8	486	377	24599	0.47	0.71	// Gga.10606.1.S1_at // GgaAffx.9788.1.S1_at // GgaAffx.6712.2.S1_s_at // Gga.9541.1.S1_at // Gga.701.1.S1_at // Gga.1193.1.S2_at // Gga.9675.1.S1_at // Gga.1193.1.S1_at
GO:0006936	P	muscle contraction	5	486	232	24599	0.49	0.73	// Gga.918.1.S1_at // Gga.4988.2.S1_a_at // GgaAffx.21017.1.S1_s_at // Gga.16589.1.S1_at // Gga.1099.1.S1_at
GO:0007165	P	signal transduction	85	486	4261	24599	0.49	0.73	// GgaAffx.3477.1.S1_at // Gga.2965.1.S1_at // GgaAffx.23327.1.S1_s_at // Gga.10606.1.S1_at // GgaAffx.968.3.S1_s_at // Gga.4113.1.S1_at // GgaAffx.11885.1.S1_s_at // Gga.1348.1.S1_at // Gga.8164.1.S1_a_at // GgaAffx.7443.1.S1_at // GgaAffx.7251.1.S1_at // Gga.7149.1.S1_at // Gga.9813.1.S1_at // GgaAffx.26700.1.S1_s_at // Gga.1193.1.S1_at // Gga.6387.1.S1_at // Gga.4970.1.S1_at // GgaAffx.4780.1.…
GO:0003012	P	muscle system process	5	486	235	24599	0.5	0.74	// Gga.918.1.S1_at // Gga.4988.2.S1_a_at // GgaAffx.21017.1.S1_s_at // Gga.16589.1.S1_at // Gga.1099.1.S1_at
GO:0006412	P	translation	9	486	445	24599	0.52	0.76	// Gga.13146.1.S1_at // Gga.916.1.S1_at // GgaAffx.1032.1.S1_s_at // Gga.701.1.S1_at // Gga.4374.1.S1_a_at // Gga.723.1.S1_a_at // Gga.701.1.S1_s_at // GgaAffx.10617.2.S1_s_at // Gga.703.1.S1_at
GO:0006461	P	protein complex assembly	9	486	444	24599	0.52	0.76	// Gga.7149.1.S1_at // GgaAffx.25229.1.S1_at // Gga.13442.1.S1_at // Gga.4451.1.S1_at // Gga.701.1.S1_at // GgaAffx.1027.1.S1_at // Gga.998.2.S1_a_at // Gga.11016.1.S1_at // GgaAffx.21790.1.S1_s_at
GO:0033036	P	macromolecule localization	20	486	1005	24599	0.52	0.76	// Gga.6072.2.S1_at // Gga.3027.1.S1_at // Gga.4359.1.S1_s_at // GgaAffx.2373.1.S1_s_at // Gga.13442.1.S1_at // Gga.916.1.S1_at // Gga.998.2.S1_a_at // Gga.8164.1.S1_a_at // GgaAffx.7443.1.S1_at // Gga.701.1.S1_at // Gga.4414.1.S1_s_at // Gga.11016.1.S1_at // GgaAffx.11648.1.S1_at // Gga.4884.1.S1_at // Gga.9216.1.S1_at // Gga.16677.1.S1_at // Gga.10463.1.S1_s_at // Gga.14571.1.S1_s_at // Gga.236…
GO:0070271	P	protein complex biogenesis	9	486	444	24599	0.52	0.76	// Gga.7149.1.S1_at // GgaAffx.25229.1.S1_at // Gga.13442.1.S1_at // Gga.4451.1.S1_at // Gga.701.1.S1_at // GgaAffx.1027.1.S1_at // Gga.998.2.S1_a_at // Gga.11016.1.S1_at // GgaAffx.21790.1.S1_s_at
GO:0010648	P	negative regulation of cell communication	5	486	242	24599	0.52	0.77	// Gga.1193.1.S1_at // Gga.2965.1.S1_at // GgaAffx.1032.1.S1_s_at // Gga.10606.1.S1_at // GgaAffx.11648.1.S1_at
GO:0007010	P	cytoskeleton organization	11	486	561	24599	0.55	0.8	// Gga.16589.1.S1_at // Gga.6387.1.S1_at // Gga.10463.1.S1_s_at // Gga.13442.1.S1_at // Gga.4451.1.S1_at // Gga.3154.1.S1_at // GgaAffx.25386.1.S1_at // Gga.701.1.S1_at // GgaAffx.10876.2.S1_s_at // GgaAffx.25386.2.S1_s_at // GgaAffx.11648.1.S1_at
GO:0046486	P	glycerolipid metabolic process	6	486	303	24599	0.55	0.8	// Gga.7148.2.A1_at // Gga.701.1.S1_at // GgaAffx.3425.1.S1_at // Gga.7148.1.S1_at // GgaAffx.22378.1.S1_s_at // GgaAffx.4938.1.S1_at
GO:0051246	P	regulation of protein metabolic process	10	486	510	24599	0.55	0.8	// Gga.2965.1.S1_at // Gga.10606.1.S1_at // GgaAffx.9788.1.S1_at // GgaAffx.21790.1.S1_s_at // Gga.9541.1.S1_at // Gga.701.1.S1_at // Gga.11645.2.S1_a_at // Gga.701.1.S1_s_at // Gga.9675.1.S1_at // Gga.703.1.S1_at
GO:0016310	P	phosphorylation	25	486	1285	24599	0.56	0.81	// Gga.10606.1.S1_at // GgaAffx.968.3.S1_s_at // GgaAffx.6712.2.S1_s_at // GgaAffx.11885.1.S1_s_at // Gga.1193.1.S2_at // Gga.6964.1.S1_at // Gga.1193.1.S1_at // GgaAffx.6712.1.S1_at // GgaAffx.22748.1.S1_at // Gga.8329.1.S1_at // GgaAffx.9788.1.S1_at // Gga.9179.1.S1_at // Gga.606.1.S1_at // GgaAffx.11653.1.S1_s_at // GgaAffx.2373.1.S1_s_at // Gga.9675.1.S1_at // Gga.701.1.S1_at // GgaAffx.26700…
GO:0015031	P	protein transport	16	486	825	24599	0.57	0.81	// Gga.6072.2.S1_at // Gga.3027.1.S1_at // Gga.4359.1.S1_s_at // GgaAffx.2373.1.S1_s_at // Gga.916.1.S1_at // Gga.998.2.S1_a_at // Gga.8164.1.S1_a_at // Gga.9541.1.S1_at // Gga.701.1.S1_at // GgaAffx.7443.1.S1_at // Gga.11016.1.S1_at // GgaAffx.11648.1.S1_at // Gga.9216.1.S1_at // Gga.16677.1.S1_at // Gga.4414.1.S1_s_at // Gga.236.1.S1_at
GO:0045184	P	establishment of protein localization	16	486	830	24599	0.57	0.82	// Gga.6072.2.S1_at // Gga.3027.1.S1_at // Gga.4359.1.S1_s_at // GgaAffx.2373.1.S1_s_at // Gga.916.1.S1_at // Gga.998.2.S1_a_at // Gga.8164.1.S1_a_at // Gga.9541.1.S1_at // Gga.701.1.S1_at // GgaAffx.7443.1.S1_at // Gga.11016.1.S1_at // GgaAffx.11648.1.S1_at // Gga.9216.1.S1_at // Gga.16677.1.S1_at // Gga.4414.1.S1_s_at // Gga.236.1.S1_at
GO:0050793	P	regulation of developmental process	19	486	984	24599	0.57	0.82	// Gga.6072.2.S1_at // Gga.6553.1.S1_at // Gga.540.1.S1_at // GgaAffx.968.3.S1_s_at // Gga.916.1.S1_at // Gga.3154.1.S1_at // GgaAffx.1032.1.S1_s_at // Gga.2965.1.S1_at // Gga.1313.1.S1_s_at // Gga.723.1.S1_a_at // Gga.11016.1.S1_at // Gga.4954.2.S1_a_at // GgaAffx.21790.1.S1_s_at // GgaAffx.26700.1.S1_s_at // Gga.2603.1.S1_at // GgaAffx.11648.1.S1_at // Gga.6713.1.S1_at // GgaAffx.12646.1.S1_at …
GO:0050794	P	regulation of cellular process	138	486	7086	24599	0.58	0.82	// GgaAffx.3477.1.S1_at // GgaAffx.21436.1.S1_s_at // Gga.998.2.S1_a_at // Gga.9513.1.S2_at // Gga.4720.3.S1_a_at // GgaAffx.7443.1.S1_at // Gga.4374.1.S1_a_at // GgaAffx.12860.1.S1_at // GgaAffx.23767.1.S1_at // Gga.4954.2.S1_a_at // GgaAffx.11387.1.S1_s_at // Gga.4371.1.S1_s_at // Gga.6529.1.S1_at // GgaAffx.9789.1.S1_at // GgaAffx.26385.1.S1_s_at // Gga.12120.1.S1_at // Gga.12516.1.S1_s_at // …
GO:0043085	P	positive regulation of catalytic activity	7	486	369	24599	0.6	0.85	// Gga.2965.1.S1_at // GgaAffx.12136.1.S1_s_at // GgaAffx.6712.2.S1_s_at // Gga.701.1.S1_at // Gga.701.1.S1_s_at // Gga.1193.1.S2_at // Gga.1193.1.S1_at
GO:0045892	P	negative regulation of transcription, DNA-dependent	5	486	265	24599	0.6	0.85	// GgaAffx.11648.1.S1_at // Gga.1313.1.S1_s_at // GgaAffx.20792.1.S1_s_at // Gga.5528.1.S1_at // Gga.19934.1.S1_at
GO:0051674	P	localization of cell	10	486	531	24599	0.6	0.85	// Gga.566.1.S1_at // Gga.916.1.S1_at // Gga.9513.1.S2_at // GgaAffx.25386.1.S1_at // Gga.701.1.S1_at // GgaAffx.9461.1.S1_at // GgaAffx.21790.1.S1_s_at // GgaAffx.25386.2.S1_s_at // Gga.6529.1.S1_at // Gga.4350.1.S1_at
GO:0016044	P	cellular membrane organization	6	486	320	24599	0.61	0.85	// Gga.12120.1.S1_at // GgaAffx.25386.1.S1_at // GgaAffx.7443.1.S1_at // GgaAffx.25386.2.S1_s_at // Gga.6529.1.S1_at // Gga.2510.1.S1_at
GO:0051253	P	negative regulation of RNA metabolic process	5	486	267	24599	0.61	0.85	// GgaAffx.11648.1.S1_at // Gga.1313.1.S1_s_at // GgaAffx.20792.1.S1_s_at // Gga.5528.1.S1_at // Gga.19934.1.S1_at
GO:0006793	P	phosphorus metabolic process	29	486	1539	24599	0.63	0.87	// Gga.10606.1.S1_at // GgaAffx.968.3.S1_s_at // GgaAffx.6712.2.S1_s_at // GgaAffx.11885.1.S1_s_at // Gga.1193.1.S2_at // Gga.6964.1.S1_at // Gga.1193.1.S1_at // GgaAffx.6712.1.S1_at // GgaAffx.22748.1.S1_at // GgaAffx.378.1.S1_at // GgaAffx.9788.1.S1_at // Gga.9179.1.S1_at // Gga.606.1.S1_at // Gga.1217.1.S1_at // GgaAffx.11653.1.S1_s_at // GgaAffx.2373.1.S1_s_at // GgaAffx.12938.7.S1_s_at // Gg…
GO:0006796	P	phosphate metabolic process	29	486	1539	24599	0.63	0.87	// Gga.10606.1.S1_at // GgaAffx.968.3.S1_s_at // GgaAffx.6712.2.S1_s_at // GgaAffx.11885.1.S1_s_at // Gga.1193.1.S2_at // Gga.6964.1.S1_at // Gga.1193.1.S1_at // GgaAffx.6712.1.S1_at // GgaAffx.22748.1.S1_at // GgaAffx.378.1.S1_at // GgaAffx.9788.1.S1_at // Gga.9179.1.S1_at // Gga.606.1.S1_at // Gga.1217.1.S1_at // GgaAffx.11653.1.S1_s_at // GgaAffx.2373.1.S1_s_at // GgaAffx.12938.7.S1_s_at // Gg…
GO:0051716	P	cellular response to stimulus	11	486	595	24599	0.63	0.87	// Gga.6553.1.S1_at // Gga.566.1.S1_at // Gga.10606.1.S1_at // GgaAffx.11771.1.S1_at // GgaAffx.25386.1.S1_at // Gga.916.1.S1_at // Gga.18956.1.S1_s_at // GgaAffx.25386.2.S1_s_at // Gga.6529.1.S1_at // Gga.6713.1.S1_at // GgaAffx.11648.1.S1_at
GO:0043687	P	post-translational protein modification	30	486	1606	24599	0.64	0.89	// GgaAffx.25534.1.S1_s_at // Gga.10606.1.S1_at // GgaAffx.968.3.S1_s_at // GgaAffx.6712.2.S1_s_at // GgaAffx.11885.1.S1_s_at // Gga.1193.1.S2_at // Gga.6964.1.S1_at // Gga.1193.1.S1_at // Gga.11456.1.S1_at // GgaAffx.6712.1.S1_at // GgaAffx.22748.1.S1_at // GgaAffx.378.1.S1_at // GgaAffx.9788.1.S1_at // Gga.9179.1.S1_at // Gga.606.1.S1_at // Gga.1217.1.S1_at // GgaAffx.11653.1.S1_s_at // GgaAffx…
GO:0051094	P	positive regulation of developmental process	8	486	442	24599	0.65	0.89	// Gga.2965.1.S1_at // GgaAffx.968.3.S1_s_at // GgaAffx.1032.1.S1_s_at // Gga.11016.1.S1_at // Gga.4954.2.S1_a_at // GgaAffx.21790.1.S1_s_at // GgaAffx.26700.1.S1_s_at // GgaAffx.12646.1.S1_at
GO:0010557	P	positive regulation of macromolecule biosynthetic process	10	486	555	24599	0.66	0.9	// GgaAffx.20792.1.S1_s_at // Gga.916.1.S1_at // Gga.1313.1.S1_s_at // Gga.723.1.S1_a_at // Gga.4954.2.S1_a_at // Gga.2603.1.S1_at // Gga.4374.1.S1_a_at // Gga.578.1.S1_at // GgaAffx.10617.2.S1_s_at // Gga.276.1.S1_at
GO:0051093	P	negative regulation of developmental process	7	486	393	24599	0.66	0.9	// Gga.6072.2.S1_at // Gga.6553.1.S1_at // GgaAffx.1032.1.S1_s_at // Gga.1313.1.S1_s_at // Gga.2603.1.S1_at // GgaAffx.11648.1.S1_at // Gga.6713.1.S1_at
GO:0065003	P	macromolecular complex assembly	10	486	562	24599	0.67	0.92	// Gga.7149.1.S1_at // GgaAffx.25229.1.S1_at // Gga.13146.1.S1_at // Gga.13442.1.S1_at // Gga.4451.1.S1_at // Gga.701.1.S1_at // GgaAffx.1027.1.S1_at // Gga.998.2.S1_a_at // Gga.11016.1.S1_at // GgaAffx.21790.1.S1_s_at
GO:0044093	P	positive regulation of molecular function	7	486	402	24599	0.68	0.93	// Gga.2965.1.S1_at // GgaAffx.12136.1.S1_s_at // GgaAffx.6712.2.S1_s_at // Gga.701.1.S1_at // Gga.701.1.S1_s_at // Gga.1193.1.S2_at // Gga.1193.1.S1_at
GO:0008104	P	protein localization	17	486	953	24599	0.7	0.94	// Gga.6072.2.S1_at // Gga.3027.1.S1_at // Gga.4359.1.S1_s_at // GgaAffx.2373.1.S1_s_at // Gga.13442.1.S1_at // Gga.998.2.S1_a_at // Gga.8164.1.S1_a_at // GgaAffx.7443.1.S1_at // Gga.701.1.S1_at // Gga.9541.1.S1_at // Gga.11016.1.S1_at // GgaAffx.11648.1.S1_at // Gga.9216.1.S1_at // Gga.16677.1.S1_at // Gga.236.1.S1_at // Gga.4414.1.S1_s_at // Gga.916.1.S1_at
GO:0009891	P	positive regulation of biosynthetic process	10	486	579	24599	0.71	0.95	// GgaAffx.20792.1.S1_s_at // Gga.916.1.S1_at // Gga.1313.1.S1_s_at // Gga.723.1.S1_a_at // Gga.4954.2.S1_a_at // Gga.2603.1.S1_at // Gga.4374.1.S1_a_at // Gga.578.1.S1_at // GgaAffx.10617.2.S1_s_at // Gga.276.1.S1_at
GO:0031328	P	positive regulation of cellular biosynthetic process	10	486	579	24599	0.71	0.95	// GgaAffx.20792.1.S1_s_at // Gga.916.1.S1_at // Gga.1313.1.S1_s_at // Gga.723.1.S1_a_at // Gga.4954.2.S1_a_at // Gga.2603.1.S1_at // Gga.4374.1.S1_a_at // Gga.578.1.S1_at // GgaAffx.10617.2.S1_s_at // Gga.276.1.S1_at
GO:0032268	P	regulation of cellular protein metabolic process	8	486	474	24599	0.72	0.97	// Gga.2965.1.S1_at // Gga.10606.1.S1_at // GgaAffx.9788.1.S1_at // Gga.9541.1.S1_at // Gga.701.1.S1_at // Gga.701.1.S1_s_at // Gga.9675.1.S1_at // Gga.703.1.S1_at
GO:0045859	P	regulation of protein kinase activity	5	486	306	24599	0.72	0.97	// GgaAffx.6712.2.S1_s_at // Gga.1193.1.S1_at // Gga.10606.1.S1_at // Gga.701.1.S1_at // Gga.1193.1.S2_at
GO:0019538	P	protein metabolic process	63	486	3458	24599	0.75	1	// Gga.2965.1.S1_at // Gga.606.1.S1_at // Gga.10606.1.S1_at // GgaAffx.968.3.S1_s_at // GgaAffx.8628.1.S1_at // GgaAffx.6712.2.S1_s_at // GgaAffx.11885.1.S1_s_at // Gga.2510.1.S1_at // Gga.8329.1.S1_at // Gga.11645.2.S1_a_at // Gga.4374.1.S1_a_at // Gga.1193.1.S2_at // Gga.6964.1.S1_at // Gga.1193.1.S1_at // GgaAffx.10617.2.S1_s_at // Gga.6713.1.S1_at // Gga.11456.1.S1_at // GgaAffx.22748.1.S1_at…
GO:0043549	P	regulation of kinase activity	5	486	317	24599	0.75	1	// GgaAffx.6712.2.S1_s_at // Gga.1193.1.S1_at // Gga.10606.1.S1_at // Gga.701.1.S1_at // Gga.1193.1.S2_at
GO:0051338	P	regulation of transferase activity	5	486	318	24599	0.75	1	// GgaAffx.6712.2.S1_s_at // Gga.1193.1.S1_at // Gga.10606.1.S1_at // Gga.701.1.S1_at // Gga.1193.1.S2_at
GO:0032502	P	developmental process	62	486	3432	24599	0.77	1	// Gga.2965.1.S1_at // Gga.10606.1.S1_at // GgaAffx.968.3.S1_s_at // Gga.998.2.S1_a_at // GgaAffx.11885.1.S1_s_at // GgaAffx.21283.1.S1_at // GgaAffx.7443.1.S1_at // Gga.1313.1.S1_s_at // Gga.4954.2.S1_a_at // Gga.1193.1.S1_at // Gga.4458.1.S1_at // Gga.11456.1.S1_at // Gga.6713.1.S1_at // GgaAffx.12646.1.S1_at // GgaAffx.24185.1.S1_at // GgaAffx.25229.1.S1_at // GgaAffx.25534.1.S1_s_at // GgaAff…
GO:0016481	P	negative regulation of transcription	6	486	390	24599	0.78	1	// GgaAffx.20792.1.S1_s_at // Gga.1313.1.S1_s_at // Gga.19934.1.S1_at // GgaAffx.11648.1.S1_at // Gga.578.1.S1_at // Gga.5528.1.S1_at
GO:0045893	P	positive regulation of transcription, DNA-dependent	5	486	334	24599	0.79	1	// Gga.2603.1.S1_at // Gga.578.1.S1_at // Gga.4954.2.S1_a_at // Gga.1313.1.S1_s_at // Gga.916.1.S1_at
GO:0051254	P	positive regulation of RNA metabolic process	5	486	336	24599	0.79	1	// Gga.2603.1.S1_at // Gga.578.1.S1_at // Gga.4954.2.S1_a_at // Gga.1313.1.S1_s_at // Gga.916.1.S1_at
GO:0009653	P	anatomical structure morphogenesis	22	486	1305	24599	0.8	1	// Gga.998.2.S1_a_at // GgaAffx.21283.1.S1_at // Gga.6713.1.S1_at // GgaAffx.12313.1.S1_at // GgaAffx.9461.1.S1_at // GgaAffx.21790.1.S1_s_at // Gga.3199.1.S1_at // GgaAffx.25386.2.S1_s_at // GgaAffx.11648.1.S1_at // Gga.540.1.S1_at // GgaAffx.20792.1.S1_s_at // GgaAffx.25386.1.S1_at // Gga.19934.1.S1_at // Gga.701.1.S1_at // Gga.703.1.S1_at // Gga.701.1.S1_s_at // Gga.2603.1.S1_at // GgaAffx.267…
GO:0048598	P	embryonic morphogenesis	5	486	338	24599	0.8	1	// Gga.2603.1.S1_at // GgaAffx.21283.1.S1_at // GgaAffx.12313.1.S1_at // Gga.3807.1.S2_s_at // GgaAffx.20792.1.S1_s_at
GO:0050890	P	cognition	9	486	572	24599	0.8	1	// Gga.6553.1.S1_at // Gga.2073.1.S1_at // GgaAffx.21283.1.S1_at // Gga.540.1.S1_at // Gga.13118.1.S1_at // GgaAffx.22999.1.S1_s_at // Gga.19934.1.S1_at // Gga.6713.1.S1_at // Gga.4350.1.S1_at
GO:0051641	P	cellular localization	17	486	1029	24599	0.8	1	// Gga.6072.2.S1_at // Gga.3027.1.S1_at // Gga.4359.1.S1_s_at // GgaAffx.2373.1.S1_s_at // Gga.916.1.S1_at // GgaAffx.25386.1.S1_at // Gga.8164.1.S1_a_at // GgaAffx.7443.1.S1_at // Gga.701.1.S1_at // Gga.9541.1.S1_at // GgaAffx.11648.1.S1_at // GgaAffx.25386.2.S1_s_at // GgaAffx.26700.1.S1_s_at // Gga.6529.1.S1_at // Gga.11948.2.S1_a_at // Gga.4414.1.S1_s_at // Gga.236.1.S1_at
GO:0005975	P	carbohydrate metabolic process	10	486	639	24599	0.81	1	// Gga.713.1.S1_at // GgaAffx.26768.1.S1_s_at // Gga.9103.1.S1_at // Gga.7148.2.A1_at // Gga.9732.1.S1_at // Gga.3676.1.S1_at // Gga.7765.1.S1_at // GgaAffx.3425.1.S1_at // Gga.7148.1.S1_at // GgaAffx.22378.1.S1_s_at
GO:0009888	P	tissue development	11	486	696	24599	0.81	1	// Gga.6072.2.S1_at // Gga.2073.1.S1_at // Gga.3807.1.S2_s_at // GgaAffx.11885.1.S1_s_at // GgaAffx.25534.1.S1_s_at // Gga.540.1.S1_at // Gga.4884.1.S1_at // GgaAffx.21790.1.S1_s_at // Gga.19934.1.S1_at // Gga.11456.1.S1_at // Gga.578.1.S1_at
GO:0010628	P	positive regulation of gene expression	8	486	524	24599	0.81	1	// GgaAffx.20792.1.S1_s_at // Gga.916.1.S1_at // Gga.4359.1.S1_s_at // Gga.1313.1.S1_s_at // Gga.4954.2.S1_a_at // Gga.2603.1.S1_at // Gga.578.1.S1_at // Gga.276.1.S1_at
GO:0010629	P	negative regulation of gene expression	6	486	406	24599	0.81	1	// GgaAffx.20792.1.S1_s_at // Gga.1313.1.S1_s_at // Gga.19934.1.S1_at // GgaAffx.11648.1.S1_at // Gga.578.1.S1_at // Gga.5528.1.S1_at
GO:0006357	P	regulation of transcription from RNA polymerase II promoter	9	486	591	24599	0.82	1	// GgaAffx.21436.1.S1_s_at // GgaAffx.20792.1.S1_s_at // Gga.1313.1.S1_s_at // Gga.4954.2.S1_a_at // Gga.19934.1.S1_at // Gga.2603.1.S1_at // GgaAffx.11648.1.S1_at // Gga.578.1.S1_at // GgaAffx.4780.1.S1_at
GO:0006629	P	lipid metabolic process	15	486	953	24599	0.84	1	// Gga.739.1.S1_at // Gga.7148.2.A1_at // Gga.2589.1.S1_at // Gga.1758.1.S1_at // Gga.701.1.S1_at // Gga.10928.1.S1_at // GgaAffx.7420.1.S1_at // Gga.6612.2.A1_at // Gga.4884.1.S1_at // GgaAffx.3425.1.S1_at // Gga.4401.1.S1_a_at // Gga.7148.1.S1_at // Gga.5396.1.S1_at // GgaAffx.22378.1.S1_s_at // GgaAffx.4938.1.S1_at
GO:0007600	P	sensory perception	7	486	480	24599	0.84	1	// Gga.2073.1.S1_at // GgaAffx.21283.1.S1_at // Gga.540.1.S1_at // Gga.13118.1.S1_at // GgaAffx.22999.1.S1_s_at // Gga.19934.1.S1_at // Gga.4350.1.S1_at
GO:0045935	P	positive regulation of nucleobase, nucleoside, nucleotide and nucleic acid metabolic process	8	486	544	24599	0.84	1	// GgaAffx.20792.1.S1_s_at // Gga.916.1.S1_at // Gga.1313.1.S1_s_at // Gga.723.1.S1_a_at // Gga.4954.2.S1_a_at // Gga.2603.1.S1_at // Gga.578.1.S1_at // Gga.276.1.S1_at
GO:0045934	P	negative regulation of nucleobase, nucleoside, nucleotide and nucleic acid metabolic process	6	486	426	24599	0.85	1	// GgaAffx.20792.1.S1_s_at // Gga.1313.1.S1_s_at // Gga.19934.1.S1_at // GgaAffx.11648.1.S1_at // Gga.578.1.S1_at // Gga.5528.1.S1_at
GO:0051172	P	negative regulation of nitrogen compound metabolic process	6	486	432	24599	0.85	1	// GgaAffx.20792.1.S1_s_at // Gga.1313.1.S1_s_at // Gga.19934.1.S1_at // GgaAffx.11648.1.S1_at // Gga.578.1.S1_at // Gga.5528.1.S1_at
GO:0051726	P	regulation of cell cycle	5	486	365	24599	0.85	1	// Gga.1193.1.S1_at // Gga.2965.1.S1_at // GgaAffx.11648.1.S1_at // Gga.4954.2.S1_a_at // Gga.723.1.S1_a_at
GO:0022607	P	cellular component assembly	12	486	798	24599	0.86	1	// Gga.7149.1.S1_at // Gga.6387.1.S1_at // GgaAffx.25229.1.S1_at // Gga.13146.1.S1_at // Gga.13442.1.S1_at // Gga.4451.1.S1_at // Gga.701.1.S1_at // GgaAffx.1027.1.S1_at // Gga.998.2.S1_a_at // Gga.11016.1.S1_at // GgaAffx.10876.2.S1_s_at // GgaAffx.21790.1.S1_s_at
GO:0030030	P	cell projection organization	6	486	439	24599	0.86	1	// Gga.6553.1.S1_at // Gga.6387.1.S1_at // Gga.13442.1.S1_at // GgaAffx.21283.1.S1_at // GgaAffx.21790.1.S1_s_at // Gga.6713.1.S1_at
GO:0051173	P	positive regulation of nitrogen compound metabolic process	8	486	556	24599	0.86	1	// GgaAffx.20792.1.S1_s_at // Gga.916.1.S1_at // Gga.1313.1.S1_s_at // Gga.723.1.S1_a_at // Gga.4954.2.S1_a_at // Gga.2603.1.S1_at // Gga.578.1.S1_at // Gga.276.1.S1_at
GO:0006811	P	ion transport	22	486	1381	24599	0.87	1	// Gga.2551.2.S1_s_at // Gga.918.1.S1_at // Gga.1193.1.S1_at // GgaAffx.10393.1.S1_at // GgaAffx.25534.1.S1_s_at // GgaAffx.22999.1.S1_s_at // Gga.1099.1.S1_at // Gga.9207.2.S1_a_at // Gga.7298.1.S1_at // Gga.198.1.S1_at // Gga.11184.1.S1_at // Gga.888.1.S1_at // GgaAffx.1584.1.S1_at // GgaAffx.26700.1.S1_s_at // Gga.9873.1.S1_at // Gga.2073.1.S1_at // GgaAffx.8046.1.S1_s_at // Gga.9541.1.S1_at /…
GO:0051649	P	establishment of localization in cell	15	486	982	24599	0.87	1	// Gga.6072.2.S1_at // Gga.3027.1.S1_at // Gga.4359.1.S1_s_at // GgaAffx.2373.1.S1_s_at // Gga.916.1.S1_at // Gga.8164.1.S1_a_at // GgaAffx.7443.1.S1_at // Gga.701.1.S1_at // Gga.9541.1.S1_at // GgaAffx.11648.1.S1_at // GgaAffx.26700.1.S1_s_at // Gga.6529.1.S1_at // Gga.11948.2.S1_a_at // Gga.4414.1.S1_s_at // Gga.236.1.S1_at
GO:0006464	P	protein modification process	31	486	1933	24599	0.89	1	// GgaAffx.25534.1.S1_s_at // Gga.10606.1.S1_at // GgaAffx.968.3.S1_s_at // GgaAffx.6712.2.S1_s_at // GgaAffx.11885.1.S1_s_at // Gga.1193.1.S2_at // Gga.6964.1.S1_at // Gga.1193.1.S1_at // Gga.11456.1.S1_at // GgaAffx.6712.1.S1_at // GgaAffx.22748.1.S1_at // GgaAffx.378.1.S1_at // GgaAffx.9788.1.S1_at // Gga.9179.1.S1_at // Gga.606.1.S1_at // Gga.1217.1.S1_at // GgaAffx.11653.1.S1_s_at // GgaAffx…
GO:0044262	P	cellular carbohydrate metabolic process	5	486	397	24599	0.89	1	// GgaAffx.3425.1.S1_at // Gga.7148.1.S1_at // GgaAffx.22378.1.S1_s_at // Gga.3676.1.S1_at // Gga.7148.2.A1_at
GO:0045941	P	positive regulation of transcription	7	486	522	24599	0.89	1	// GgaAffx.20792.1.S1_s_at // Gga.916.1.S1_at // Gga.1313.1.S1_s_at // Gga.4954.2.S1_a_at // Gga.2603.1.S1_at // Gga.578.1.S1_at // Gga.276.1.S1_at
GO:0006259	P	DNA metabolic process	10	486	719	24599	0.9	1	// Gga.3027.1.S1_at // Gga.916.1.S1_at // GgaAffx.8515.1.S1_at // Gga.11830.1.S1_at // GgaAffx.12136.1.S1_s_at // Gga.18956.1.S1_s_at // Gga.13927.1.S1_at // Gga.723.1.S1_a_at // Gga.4359.1.S2_s_at // GgaAffx.11648.1.S1_at
GO:0007417	P	central nervous system development	5	486	407	24599	0.9	1	// Gga.2965.1.S1_at // Gga.578.1.S1_at // GgaAffx.20792.1.S1_s_at // Gga.4350.1.S1_at // GgaAffx.2960.1.S1_s_at
GO:0043933	P	macromolecular complex subunit organization	10	486	714	24599	0.9	1	// Gga.7149.1.S1_at // GgaAffx.25229.1.S1_at // Gga.13146.1.S1_at // Gga.13442.1.S1_at // Gga.4451.1.S1_at // Gga.701.1.S1_at // GgaAffx.1027.1.S1_at // Gga.998.2.S1_a_at // Gga.11016.1.S1_at // GgaAffx.21790.1.S1_s_at
GO:0033554	P	cellular response to stress	6	486	483	24599	0.91	1	// Gga.6553.1.S1_at // GgaAffx.11771.1.S1_at // Gga.916.1.S1_at // Gga.18956.1.S1_s_at // GgaAffx.11648.1.S1_at // Gga.6713.1.S1_at
GO:0044255	P	cellular lipid metabolic process	12	486	847	24599	0.91	1	// Gga.7148.2.A1_at // Gga.2589.1.S1_at // Gga.1758.1.S1_at // Gga.701.1.S1_at // Gga.10928.1.S1_at // GgaAffx.7420.1.S1_at // GgaAffx.3425.1.S1_at // Gga.4401.1.S1_a_at // Gga.7148.1.S1_at // Gga.5396.1.S1_at // GgaAffx.22378.1.S1_s_at // GgaAffx.4938.1.S1_at
GO:0048646	P	anatomical structure formation involved in morphogenesis	5	486	415	24599	0.91	1	// Gga.3199.1.S1_at // Gga.701.1.S1_s_at // Gga.703.1.S1_at // Gga.701.1.S1_at // Gga.3807.1.S2_s_at
GO:0006366	P	transcription from RNA polymerase II promoter	9	486	680	24599	0.92	1	// GgaAffx.21436.1.S1_s_at // GgaAffx.20792.1.S1_s_at // Gga.1313.1.S1_s_at // Gga.4954.2.S1_a_at // Gga.19934.1.S1_at // Gga.2603.1.S1_at // GgaAffx.11648.1.S1_at // Gga.578.1.S1_at // GgaAffx.4780.1.S1_at
GO:0043412	P	macromolecule modification	31	486	1996	24599	0.92	1	// GgaAffx.25534.1.S1_s_at // Gga.10606.1.S1_at // GgaAffx.968.3.S1_s_at // GgaAffx.6712.2.S1_s_at // GgaAffx.11885.1.S1_s_at // Gga.1193.1.S2_at // Gga.6964.1.S1_at // Gga.1193.1.S1_at // Gga.11456.1.S1_at // GgaAffx.6712.1.S1_at // GgaAffx.22748.1.S1_at // GgaAffx.378.1.S1_at // GgaAffx.9788.1.S1_at // Gga.9179.1.S1_at // Gga.606.1.S1_at // Gga.1217.1.S1_at // GgaAffx.11653.1.S1_s_at // GgaAffx…
GO:0007167	P	enzyme linked receptor protein signaling pathway	5	486	435	24599	0.93	1	// GgaAffx.22999.1.S1_s_at // Gga.236.1.S1_at // GgaAffx.25534.1.S1_s_at // Gga.10606.1.S1_at // GgaAffx.7443.1.S1_at
GO:0009790	P	embryonic development	7	486	569	24599	0.93	1	// Gga.3807.1.S2_s_at // GgaAffx.12313.1.S1_at // GgaAffx.21283.1.S1_at // GgaAffx.21790.1.S1_s_at // GgaAffx.20792.1.S1_s_at // Gga.19934.1.S1_at // Gga.2603.1.S1_at
GO:0030182	P	neuron differentiation	6	486	504	24599	0.93	1	// Gga.6553.1.S1_at // Gga.2965.1.S1_at // GgaAffx.21283.1.S1_at // GgaAffx.21779.1.S1_s_at // GgaAffx.21790.1.S1_s_at // Gga.6713.1.S1_at
GO:0034613	P	cellular protein localization	6	486	506	24599	0.93	1	// Gga.6072.2.S1_at // GgaAffx.2373.1.S1_s_at // Gga.8164.1.S1_a_at // GgaAffx.7443.1.S1_at // GgaAffx.11648.1.S1_at // Gga.4414.1.S1_s_at
GO:0048699	P	generation of neurons	7	486	564	24599	0.93	1	// Gga.6553.1.S1_at // Gga.2965.1.S1_at // GgaAffx.21283.1.S1_at // GgaAffx.21779.1.S1_s_at // GgaAffx.21790.1.S1_s_at // Gga.6713.1.S1_at // Gga.4350.1.S1_at
GO:0006066	P	alcohol metabolic process	5	486	443	24599	0.94	1	// GgaAffx.3425.1.S1_at // Gga.7148.1.S1_at // GgaAffx.22378.1.S1_s_at // Gga.3676.1.S1_at // Gga.7148.2.A1_at
GO:0007267	P	cell-cell signaling	9	486	717	24599	0.94	1	// Gga.6553.1.S1_at // Gga.6713.1.S1_at // GgaAffx.21790.1.S1_s_at // Gga.918.1.S1_at // GgaAffx.1557.1.S1_at // Gga.19934.1.S1_at // GgaAffx.5322.1.S1_at // Gga.1020.1.S1_at // Gga.7298.1.S1_at
GO:0022008	P	neurogenesis	7	486	589	24599	0.94	1	// Gga.6553.1.S1_at // Gga.2965.1.S1_at // GgaAffx.21283.1.S1_at // GgaAffx.21779.1.S1_s_at // GgaAffx.21790.1.S1_s_at // Gga.6713.1.S1_at // Gga.4350.1.S1_at
GO:0030001	P	metal ion transport	11	486	845	24599	0.94	1	// Gga.198.1.S1_at // Gga.11184.1.S1_at // Gga.2551.2.S1_s_at // GgaAffx.1584.1.S1_at // Gga.9541.1.S1_at // Gga.2551.2.S1_a_at // Gga.918.1.S1_at // GgaAffx.1584.2.S1_s_at // Gga.1099.1.S1_at // Gga.1193.1.S1_at // GgaAffx.26700.1.S1_s_at
GO:0070727	P	cellular macromolecule localization	6	486	510	24599	0.94	1	// Gga.6072.2.S1_at // GgaAffx.2373.1.S1_s_at // Gga.8164.1.S1_a_at // GgaAffx.7443.1.S1_at // GgaAffx.11648.1.S1_at // Gga.4414.1.S1_s_at
GO:0006810	P	transport	51	486	3263	24599	0.96	1	// Gga.3027.1.S1_at // Gga.2551.2.S1_s_at // Gga.998.2.S1_a_at // Gga.2510.1.S1_at // Gga.8164.1.S1_a_at // GgaAffx.7443.1.S1_at // Gga.918.1.S1_at // Gga.4884.1.S1_at // Gga.1193.1.S1_at // Gga.6529.1.S1_at // GgaAffx.9789.1.S1_at // Gga.12120.1.S1_at // Gga.9873.1.S1_at // GgaAffx.10393.1.S1_at // GgaAffx.25534.1.S1_s_at // GgaAffx.22999.1.S1_s_at // Gga.2909.1.S1_at // Gga.1099.1.S1_at // Gga.…
GO:0006812	P	cation transport	14	486	1087	24599	0.96	1	// Gga.198.1.S1_at // Gga.11184.1.S1_at // Gga.2551.2.S1_s_at // GgaAffx.1584.1.S1_at // Gga.9541.1.S1_at // Gga.2551.2.S1_a_at // Gga.918.1.S1_at // GgaAffx.8046.1.S1_s_at // GgaAffx.1584.2.S1_s_at // Gga.1099.1.S1_at // Gga.1193.1.S1_at // Gga.9207.2.S1_a_at // GgaAffx.26700.1.S1_s_at // GgaAffx.5539.1.S1_s_at
GO:0006886	P	intracellular protein transport	5	486	491	24599	0.96	1	// GgaAffx.11648.1.S1_at // Gga.8164.1.S1_a_at // GgaAffx.2373.1.S1_s_at // Gga.4414.1.S1_s_at // GgaAffx.7443.1.S1_at
GO:0009069	P	serine family amino acid metabolic process	6	486	557	24599	0.96	1	// GgaAffx.9971.2.S1_s_at // GgaAffx.22748.1.S1_at // Gga.9179.1.S1_at // GgaAffx.6712.2.S1_s_at // GgaAffx.26700.1.S1_s_at // GgaAffx.5597.1.S1_at
GO:0044267	P	cellular protein metabolic process	43	486	2799	24599	0.96	1	// Gga.2965.1.S1_at // Gga.606.1.S1_at // Gga.10606.1.S1_at // GgaAffx.968.3.S1_s_at // GgaAffx.6712.2.S1_s_at // GgaAffx.11885.1.S1_s_at // Gga.4374.1.S1_a_at // Gga.1193.1.S2_at // Gga.6964.1.S1_at // Gga.1193.1.S1_at // GgaAffx.10617.2.S1_s_at // GgaAffx.6712.1.S1_at // GgaAffx.9788.1.S1_at // GgaAffx.22748.1.S1_at // GgaAffx.378.1.S1_at // Gga.11337.1.S1_at // Gga.536.1.S1_a_at // Gga.9179.1.…
GO:0051234	P	establishment of localization	51	486	3279	24599	0.96	1	// Gga.3027.1.S1_at // Gga.2551.2.S1_s_at // Gga.998.2.S1_a_at // Gga.2510.1.S1_at // Gga.8164.1.S1_a_at // GgaAffx.7443.1.S1_at // Gga.918.1.S1_at // Gga.4884.1.S1_at // Gga.1193.1.S1_at // Gga.6529.1.S1_at // GgaAffx.9789.1.S1_at // Gga.12120.1.S1_at // Gga.9873.1.S1_at // GgaAffx.10393.1.S1_at // GgaAffx.25534.1.S1_s_at // GgaAffx.22999.1.S1_s_at // Gga.2909.1.S1_at // Gga.1099.1.S1_at // Gga.…
GO:0006118	P	electron transport	8	486	724	24599	0.97	1	// Gga.4110.7.S1_s_at // GgaAffx.10393.1.S1_at // Gga.217.1.S1_x_at // GgaAffx.25386.1.S1_at // GgaAffx.7943.1.S1_s_at // Gga.11645.2.S1_a_at // GgaAffx.26579.1.S1_s_at // GgaAffx.25386.2.S1_s_at
GO:0019226	P	transmission of nerve impulse	5	486	514	24599	0.97	1	// Gga.6553.1.S1_at // Gga.6713.1.S1_at // Gga.918.1.S1_at // Gga.4350.1.S1_at // Gga.916.1.S1_at
GO:0051179	P	localization	58	486	3768	24599	0.97	1	// Gga.3027.1.S1_at // Gga.2551.2.S1_s_at // Gga.998.2.S1_a_at // Gga.9513.1.S2_at // Gga.2510.1.S1_at // Gga.8164.1.S1_a_at // GgaAffx.7443.1.S1_at // Gga.918.1.S1_at // Gga.4884.1.S1_at // Gga.1193.1.S1_at // Gga.6529.1.S1_at // GgaAffx.9789.1.S1_at // Gga.12120.1.S1_at // Gga.9873.1.S1_at // Gga.236.1.S1_at // Gga.13442.1.S1_at // GgaAffx.10393.1.S1_at // GgaAffx.25534.1.S1_s_at // GgaAffx.229…
GO:0003008	P	system process	16	486	1269	24599	0.98	1	// Gga.6553.1.S1_at // Gga.2073.1.S1_at // GgaAffx.21017.1.S1_s_at // Gga.916.1.S1_at // Gga.4988.2.S1_a_at // Gga.1099.1.S1_at // Gga.540.1.S1_at // Gga.13118.1.S1_at // Gga.918.1.S1_at // GgaAffx.21790.1.S1_s_at // GgaAffx.22999.1.S1_s_at // Gga.19934.1.S1_at // Gga.16589.1.S1_at // Gga.6713.1.S1_at // GgaAffx.21283.1.S1_at // Gga.4350.1.S1_at
GO:0009887	P	organ morphogenesis	8	486	735	24599	0.98	1	// Gga.540.1.S1_at // Gga.3807.1.S2_s_at // GgaAffx.21283.1.S1_at // GgaAffx.21790.1.S1_s_at // GgaAffx.9461.1.S1_at // GgaAffx.26700.1.S1_s_at // Gga.3199.1.S1_at // Gga.2603.1.S1_at
GO:0044248	P	cellular catabolic process	10	486	903	24599	0.98	1	// Gga.7148.2.A1_at // Gga.2589.1.S1_at // Gga.11830.1.S1_at // GgaAffx.12136.1.S1_s_at // GgaAffx.7420.1.S1_at // Gga.6017.1.S1_s_at // GgaAffx.3425.1.S1_at // Gga.7148.1.S1_at // GgaAffx.22378.1.S1_s_at // GgaAffx.23872.1.S1_at
GO:0006996	P	organelle organization	16	486	1339	24599	0.99	1	// Gga.6072.2.S1_at // Gga.16589.1.S1_at // Gga.6387.1.S1_at // Gga.10463.1.S1_s_at // Gga.13442.1.S1_at // Gga.4451.1.S1_at // Gga.1247.1.S2_at // GgaAffx.25386.1.S1_at // GgaAffx.12136.1.S1_s_at // Gga.701.1.S1_at // Gga.723.1.S1_a_at // GgaAffx.10876.2.S1_s_at // Gga.3154.1.S1_at // GgaAffx.25386.2.S1_s_at // GgaAffx.11648.1.S1_at // Gga.11830.1.S1_at
GO:0007399	P	nervous system development	12	486	1096	24599	0.99	1	// Gga.6553.1.S1_at // Gga.2965.1.S1_at // Gga.6713.1.S1_at // GgaAffx.20792.1.S1_s_at // Gga.916.1.S1_at // GgaAffx.21283.1.S1_at // GgaAffx.21790.1.S1_s_at // GgaAffx.21779.1.S1_s_at // GgaAffx.2960.1.S1_s_at // Gga.19934.1.S1_at // Gga.578.1.S1_at // Gga.4350.1.S1_at
GO:0016043	P	cellular component organization	35	486	2526	24599	0.99	1	// Gga.6387.1.S1_at // GgaAffx.12136.1.S1_s_at // Gga.998.2.S1_a_at // Gga.1247.1.S2_at // Gga.11830.1.S1_at // GgaAffx.7443.1.S1_at // GgaAffx.10876.2.S1_s_at // Gga.6529.1.S1_at // Gga.6713.1.S1_at // Gga.12120.1.S1_at // Gga.16589.1.S1_at // GgaAffx.25229.1.S1_at // Gga.13442.1.S1_at // GgaAffx.25534.1.S1_s_at // GgaAffx.1027.1.S1_at // Gga.19934.1.S1_at // GgaAffx.25386.2.S1_s_at // GgaAffx.1…
GO:0044085	P	cellular component biogenesis	12	486	1074	24599	0.99	1	// Gga.7149.1.S1_at // Gga.6387.1.S1_at // GgaAffx.25229.1.S1_at // Gga.13146.1.S1_at // Gga.13442.1.S1_at // Gga.4451.1.S1_at // Gga.701.1.S1_at // GgaAffx.1027.1.S1_at // Gga.998.2.S1_a_at // Gga.11016.1.S1_at // GgaAffx.10876.2.S1_s_at // GgaAffx.21790.1.S1_s_at
GO:0048468	P	cell development	8	486	866	24599	0.99	1	// Gga.6553.1.S1_at // Gga.2965.1.S1_at // GgaAffx.21283.1.S1_at // GgaAffx.21790.1.S1_s_at // Gga.701.1.S1_at // Gga.19934.1.S1_at // GgaAffx.11648.1.S1_at // Gga.6713.1.S1_at
GO:0050877	P	neurological system process	11	486	990	24599	0.99	1	// Gga.6553.1.S1_at // Gga.2073.1.S1_at // Gga.916.1.S1_at // GgaAffx.21283.1.S1_at // Gga.540.1.S1_at // Gga.13118.1.S1_at // Gga.918.1.S1_at // GgaAffx.22999.1.S1_s_at // Gga.19934.1.S1_at // Gga.6713.1.S1_at // Gga.4350.1.S1_at
GO:0006082	P	organic acid metabolic process	13	486	1374	24599	1	1	// GgaAffx.378.1.S1_at // GgaAffx.22748.1.S1_at // Gga.9179.1.S1_at // GgaAffx.9971.2.S1_s_at // Gga.1758.1.S1_at // Gga.10928.1.S1_at // GgaAffx.6712.2.S1_s_at // GgaAffx.8757.1.S1_at // GgaAffx.26700.1.S1_s_at // Gga.1193.1.S1_at // Gga.4401.1.S1_a_at // GgaAffx.5597.1.S1_at // Gga.5396.1.S1_at
GO:0006139	P	nucleobase, nucleoside, nucleotide and nucleic acid metabolic process	28	486	3813	24599	1	1	// GgaAffx.21436.1.S1_s_at // Gga.2965.1.S1_at // GgaAffx.12136.1.S1_s_at // Gga.11830.1.S1_at // Gga.8164.1.S1_a_at // Gga.3027.1.S1_at // Gga.1313.1.S1_s_at // GgaAffx.23767.1.S1_at // Gga.4954.2.S1_a_at // Gga.4371.1.S1_s_at // GgaAffx.4780.1.S1_at // GgaAffx.8515.1.S1_at // Gga.19934.1.S1_at // Gga.2603.1.S1_at // GgaAffx.11648.1.S1_at // Gga.5528.1.S1_at // GgaAffx.20792.1.S1_s_at // Gga.916…
GO:0006350	P	transcription	17	486	2254	24599	1	1	// GgaAffx.21436.1.S1_s_at // Gga.4371.1.S1_s_at // GgaAffx.20792.1.S1_s_at // Gga.916.1.S1_at // Gga.8164.1.S1_a_at // Gga.701.1.S1_at // Gga.1313.1.S1_s_at // Gga.276.1.S1_at // GgaAffx.23767.1.S1_at // Gga.4954.2.S1_a_at // Gga.7100.1.S1_at // Gga.19934.1.S1_at // Gga.2603.1.S1_at // GgaAffx.11648.1.S1_at // Gga.578.1.S1_at // GgaAffx.4780.1.S1_at // Gga.5528.1.S1_at
GO:0006351	P	transcription, DNA-dependent	17	486	2008	24599	1	1	// GgaAffx.21436.1.S1_s_at // Gga.4371.1.S1_s_at // GgaAffx.20792.1.S1_s_at // Gga.916.1.S1_at // Gga.8164.1.S1_a_at // Gga.701.1.S1_at // Gga.1313.1.S1_s_at // Gga.276.1.S1_at // GgaAffx.23767.1.S1_at // Gga.4954.2.S1_a_at // Gga.7100.1.S1_at // Gga.19934.1.S1_at // Gga.2603.1.S1_at // GgaAffx.11648.1.S1_at // Gga.578.1.S1_at // GgaAffx.4780.1.S1_at // Gga.5528.1.S1_at
GO:0006355	P	regulation of transcription, DNA-dependent	16	486	1928	24599	1	1	// GgaAffx.21436.1.S1_s_at // Gga.4371.1.S1_s_at // GgaAffx.20792.1.S1_s_at // Gga.916.1.S1_at // Gga.8164.1.S1_a_at // Gga.1313.1.S1_s_at // Gga.276.1.S1_at // GgaAffx.23767.1.S1_at // Gga.4954.2.S1_a_at // Gga.7100.1.S1_at // Gga.19934.1.S1_at // Gga.2603.1.S1_at // GgaAffx.11648.1.S1_at // Gga.578.1.S1_at // GgaAffx.4780.1.S1_at // Gga.5528.1.S1_at
GO:0006519	P	cellular amino acid and derivative metabolic process	9	486	1203	24599	1	1	// GgaAffx.378.1.S1_at // GgaAffx.22748.1.S1_at // Gga.9179.1.S1_at // GgaAffx.9971.2.S1_s_at // GgaAffx.6712.2.S1_s_at // GgaAffx.8757.1.S1_at // Gga.1193.1.S1_at // GgaAffx.26700.1.S1_s_at // GgaAffx.5597.1.S1_at
GO:0006520	P	cellular amino acid metabolic process	9	486	1047	24599	1	1	// GgaAffx.378.1.S1_at // GgaAffx.22748.1.S1_at // Gga.9179.1.S1_at // GgaAffx.9971.2.S1_s_at // GgaAffx.6712.2.S1_s_at // GgaAffx.8757.1.S1_at // Gga.1193.1.S1_at // GgaAffx.26700.1.S1_s_at // GgaAffx.5597.1.S1_at
GO:0006807	P	nitrogen compound metabolic process	42	486	4935	24599	1	1	// GgaAffx.21436.1.S1_s_at // Gga.2965.1.S1_at // GgaAffx.22748.1.S1_at // GgaAffx.12136.1.S1_s_at // GgaAffx.6712.2.S1_s_at // GgaAffx.8515.1.S1_at // Gga.11830.1.S1_at // Gga.8164.1.S1_a_at // Gga.3027.1.S1_at // Gga.1313.1.S1_s_at // GgaAffx.23767.1.S1_at // Gga.4954.2.S1_a_at // Gga.1193.1.S1_at // Gga.4371.1.S1_s_at // GgaAffx.4780.1.S1_at // GgaAffx.378.1.S1_at // Gga.9179.1.S1_at // Gga.91…
GO:0007049	P	cell cycle	7	486	840	24599	1	1	// Gga.2965.1.S1_at // Gga.10463.1.S1_s_at // Gga.4884.1.S1_at // Gga.723.1.S1_a_at // Gga.4954.2.S1_a_at // Gga.1193.1.S1_at // GgaAffx.11648.1.S1_at
GO:0007154	P	cell communication	37	486	4585	24599	1	1	// Gga.2965.1.S1_at // GgaAffx.11861.1.S1_at // Gga.10606.1.S1_at // GgaAffx.968.3.S1_s_at // GgaAffx.11590.1.S1_s_at // Gga.918.1.S1_at // Gga.9813.1.S1_at // Gga.1193.1.S1_at // Gga.12335.2.S1_s_at // Gga.6713.1.S1_at // Gga.4970.1.S1_at // GgaAffx.9789.1.S1_at // GgaAffx.9971.2.S1_s_at // GgaAffx.3442.2.S1_s_at // GgaAffx.12720.1.S1_at // Gga.19934.1.S1_at // GgaAffx.25386.2.S1_s_at // GgaAffx…
GO:0008152	P	metabolic process	109	486	8627	24599	1	1	// GgaAffx.21436.1.S1_s_at // GgaAffx.25534.1.S1_s_at // Gga.11830.1.S1_at // Gga.13927.1.S1_at // Gga.4374.1.S1_a_at // GgaAffx.23767.1.S1_at // Gga.4954.2.S1_a_at // GgaAffx.12938.7.S1_s_at // Gga.6964.1.S1_at // Gga.1193.1.S1_at // Gga.4371.1.S1_s_at // GgaAffx.9789.1.S1_at // Gga.12120.1.S1_at // Gga.9179.1.S1_at // Gga.6612.2.A1_at // Gga.2603.1.S1_at // Gga.7148.1.S1_at // Gga.276.1.S1_at /…
GO:0009056	P	catabolic process	13	486	1635	24599	1	1	// Gga.713.1.S1_at // Gga.9103.1.S1_at // Gga.2589.1.S1_at // Gga.11830.1.S1_at // Gga.7148.2.A1_at // GgaAffx.7420.1.S1_at // GgaAffx.12136.1.S1_s_at // Gga.6017.1.S1_s_at // GgaAffx.21790.1.S1_s_at // GgaAffx.3425.1.S1_at // Gga.7148.1.S1_at // GgaAffx.22378.1.S1_s_at // GgaAffx.23872.1.S1_at
GO:0009058	P	biosynthetic process	37	486	4297	24599	1	1	// GgaAffx.21436.1.S1_s_at // Gga.2965.1.S1_at // Gga.7148.2.A1_at // Gga.8164.1.S1_a_at // Gga.13927.1.S1_at // Gga.1313.1.S1_s_at // GgaAffx.23767.1.S1_at // Gga.4954.2.S1_a_at // Gga.1193.1.S1_at // Gga.4371.1.S1_s_at // GgaAffx.10617.2.S1_s_at // GgaAffx.4780.1.S1_at // Gga.13146.1.S1_at // GgaAffx.25534.1.S1_s_at // Gga.19934.1.S1_at // Gga.2603.1.S1_at // Gga.7148.1.S1_at // GgaAffx.22378.1…
GO:0009059	P	macromolecule biosynthetic process	29	486	3408	24599	1	1	// GgaAffx.21436.1.S1_s_at // Gga.8164.1.S1_a_at // Gga.13927.1.S1_at // Gga.1313.1.S1_s_at // GgaAffx.23767.1.S1_at // Gga.4954.2.S1_a_at // Gga.1193.1.S1_at // Gga.4371.1.S1_s_at // GgaAffx.10617.2.S1_s_at // GgaAffx.4780.1.S1_at // Gga.13146.1.S1_at // GgaAffx.25534.1.S1_s_at // Gga.19934.1.S1_at // Gga.2603.1.S1_at // GgaAffx.11648.1.S1_at // Gga.276.1.S1_at // GgaAffx.20792.1.S1_s_at // Gga.…
GO:0009308	P	amine metabolic process	12	486	1247	24599	1	1	// GgaAffx.378.1.S1_at // GgaAffx.22748.1.S1_at // Gga.9103.1.S1_at // Gga.9179.1.S1_at // GgaAffx.26768.1.S1_s_at // Gga.9732.1.S1_at // GgaAffx.6712.2.S1_s_at // GgaAffx.8757.1.S1_at // Gga.1193.1.S1_at // GgaAffx.26700.1.S1_s_at // GgaAffx.5597.1.S1_at // GgaAffx.9971.2.S1_s_at
GO:0009889	P	regulation of biosynthetic process	24	486	2463	24599	1	1	// GgaAffx.21436.1.S1_s_at // Gga.2965.1.S1_at // Gga.8164.1.S1_a_at // Gga.4374.1.S1_a_at // GgaAffx.23767.1.S1_at // Gga.4954.2.S1_a_at // Gga.4371.1.S1_s_at // GgaAffx.10617.2.S1_s_at // GgaAffx.4780.1.S1_at // Gga.19934.1.S1_at // Gga.2603.1.S1_at // GgaAffx.11648.1.S1_at // Gga.276.1.S1_at // GgaAffx.20792.1.S1_s_at // Gga.916.1.S1_at // Gga.701.1.S1_at // Gga.723.1.S1_a_at // Gga.701.1.S1_s…
GO:0009987	P	cellular process	202	486	12876	24599	1	1	// GgaAffx.3477.1.S1_at // GgaAffx.21436.1.S1_s_at // Gga.606.1.S1_at // GgaAffx.8757.1.S1_at // Gga.998.2.S1_a_at // Gga.9513.1.S2_at // Gga.11830.1.S1_at // Gga.4720.3.S1_a_at // Gga.13927.1.S1_at // Gga.4374.1.S1_a_at // GgaAffx.12860.1.S1_at // Gga.918.1.S1_at // Gga.4999.2.S1_at // GgaAffx.23767.1.S1_at // Gga.4954.2.S1_a_at // GgaAffx.12938.7.S1_s_at // Gga.6964.1.S1_at // GgaAffx.11387.1.S…
GO:0010467	P	gene expression	32	486	3172	24599	1	1	// GgaAffx.21436.1.S1_s_at // Gga.2510.1.S1_at // Gga.8164.1.S1_a_at // Gga.11645.2.S1_a_at // Gga.1313.1.S1_s_at // Gga.5528.1.S1_at // GgaAffx.23767.1.S1_at // Gga.4954.2.S1_a_at // Gga.4371.1.S1_s_at // GgaAffx.10617.2.S1_s_at // Gga.276.1.S1_at // GgaAffx.4780.1.S1_at // Gga.9873.1.S1_at // GgaAffx.1625.1.S1_s_at // Gga.19934.1.S1_at // Gga.2603.1.S1_at // GgaAffx.11648.1.S1_at // Gga.7298.1.…
GO:0010468	P	regulation of gene expression	21	486	2333	24599	1	1	// GgaAffx.21436.1.S1_s_at // Gga.4359.1.S1_s_at // Gga.4371.1.S1_s_at // GgaAffx.20792.1.S1_s_at // Gga.916.1.S1_at // Gga.8164.1.S1_a_at // Gga.11645.2.S1_a_at // Gga.1313.1.S1_s_at // Gga.701.1.S1_at // Gga.703.1.S1_at // Gga.701.1.S1_s_at // Gga.276.1.S1_at // GgaAffx.23767.1.S1_at // Gga.4954.2.S1_a_at // Gga.7100.1.S1_at // Gga.19934.1.S1_at // Gga.2603.1.S1_at // GgaAffx.11648.1.S1_at // G…
GO:0010556	P	regulation of macromolecule biosynthetic process	23	486	2333	24599	1	1	// GgaAffx.21436.1.S1_s_at // Gga.8164.1.S1_a_at // Gga.4374.1.S1_a_at // GgaAffx.23767.1.S1_at // Gga.4954.2.S1_a_at // Gga.4371.1.S1_s_at // GgaAffx.10617.2.S1_s_at // GgaAffx.4780.1.S1_at // Gga.19934.1.S1_at // Gga.2603.1.S1_at // GgaAffx.11648.1.S1_at // Gga.276.1.S1_at // GgaAffx.20792.1.S1_s_at // Gga.916.1.S1_at // Gga.701.1.S1_at // Gga.723.1.S1_a_at // Gga.701.1.S1_s_at // Gga.1313.1.S1…
GO:0016070	P	RNA metabolic process	19	486	2592	24599	1	1	// GgaAffx.21436.1.S1_s_at // Gga.4371.1.S1_s_at // GgaAffx.20792.1.S1_s_at // Gga.916.1.S1_at // Gga.8164.1.S1_a_at // Gga.701.1.S1_at // Gga.1313.1.S1_s_at // Gga.703.1.S1_at // Gga.701.1.S1_s_at // Gga.276.1.S1_at // GgaAffx.23767.1.S1_at // Gga.4954.2.S1_a_at // Gga.7100.1.S1_at // Gga.19934.1.S1_at // Gga.2603.1.S1_at // GgaAffx.11648.1.S1_at // Gga.578.1.S1_at // GgaAffx.4780.1.S1_at // Gga…
GO:0019219	P	regulation of nucleobase, nucleoside, nucleotide and nucleic acid metabolic process	22	486	2377	24599	1	1	// GgaAffx.21436.1.S1_s_at // Gga.2965.1.S1_at // Gga.8164.1.S1_a_at // Gga.1313.1.S1_s_at // GgaAffx.23767.1.S1_at // Gga.4954.2.S1_a_at // Gga.4371.1.S1_s_at // GgaAffx.4780.1.S1_at // GgaAffx.8515.1.S1_at // Gga.19934.1.S1_at // Gga.2603.1.S1_at // GgaAffx.11648.1.S1_at // Gga.276.1.S1_at // GgaAffx.20792.1.S1_s_at // Gga.916.1.S1_at // Gga.701.1.S1_at // Gga.723.1.S1_a_at // Gga.701.1.S1_s_at…
GO:0019222	P	regulation of metabolic process	37	486	3060	24599	1	1	// GgaAffx.21436.1.S1_s_at // Gga.2965.1.S1_at // Gga.10606.1.S1_at // GgaAffx.6712.2.S1_s_at // Gga.8164.1.S1_a_at // Gga.11645.2.S1_a_at // Gga.1313.1.S1_s_at // GgaAffx.23767.1.S1_at // Gga.4954.2.S1_a_at // Gga.1193.1.S1_at // Gga.4371.1.S1_s_at // GgaAffx.10617.2.S1_s_at // GgaAffx.4780.1.S1_at // GgaAffx.9789.1.S1_at // Gga.5396.1.S1_at // GgaAffx.9788.1.S1_at // GgaAffx.8515.1.S1_at // Gga…
GO:0019752	P	carboxylic acid metabolic process	13	486	1373	24599	1	1	// GgaAffx.378.1.S1_at // GgaAffx.22748.1.S1_at // Gga.9179.1.S1_at // GgaAffx.9971.2.S1_s_at // Gga.1758.1.S1_at // Gga.10928.1.S1_at // GgaAffx.6712.2.S1_s_at // GgaAffx.8757.1.S1_at // GgaAffx.26700.1.S1_s_at // Gga.1193.1.S1_at // Gga.4401.1.S1_a_at // GgaAffx.5597.1.S1_at // Gga.5396.1.S1_at
GO:0031323	P	regulation of cellular metabolic process	34	486	2968	24599	1	1	// GgaAffx.21436.1.S1_s_at // Gga.2965.1.S1_at // Gga.10606.1.S1_at // GgaAffx.6712.2.S1_s_at // Gga.8164.1.S1_a_at // Gga.1313.1.S1_s_at // GgaAffx.23767.1.S1_at // Gga.4954.2.S1_a_at // Gga.1193.1.S1_at // Gga.4371.1.S1_s_at // GgaAffx.10617.2.S1_s_at // GgaAffx.4780.1.S1_at // GgaAffx.9789.1.S1_at // Gga.5396.1.S1_at // GgaAffx.9788.1.S1_at // GgaAffx.8515.1.S1_at // Gga.19934.1.S1_at // Gga.2…
GO:0031326	P	regulation of cellular biosynthetic process	24	486	2459	24599	1	1	// GgaAffx.21436.1.S1_s_at // Gga.2965.1.S1_at // Gga.8164.1.S1_a_at // Gga.4374.1.S1_a_at // GgaAffx.23767.1.S1_at // Gga.4954.2.S1_a_at // Gga.4371.1.S1_s_at // GgaAffx.10617.2.S1_s_at // GgaAffx.4780.1.S1_at // Gga.19934.1.S1_at // Gga.2603.1.S1_at // GgaAffx.11648.1.S1_at // Gga.276.1.S1_at // GgaAffx.20792.1.S1_s_at // Gga.916.1.S1_at // Gga.701.1.S1_at // Gga.723.1.S1_a_at // Gga.701.1.S1_s…
GO:0032774	P	RNA biosynthetic process	17	486	2008	24599	1	1	// GgaAffx.21436.1.S1_s_at // Gga.4371.1.S1_s_at // GgaAffx.20792.1.S1_s_at // Gga.916.1.S1_at // Gga.8164.1.S1_a_at // Gga.701.1.S1_at // Gga.1313.1.S1_s_at // Gga.276.1.S1_at // GgaAffx.23767.1.S1_at // Gga.4954.2.S1_a_at // Gga.7100.1.S1_at // Gga.19934.1.S1_at // Gga.2603.1.S1_at // GgaAffx.11648.1.S1_at // Gga.578.1.S1_at // GgaAffx.4780.1.S1_at // Gga.5528.1.S1_at
GO:0034645	P	cellular macromolecule biosynthetic process	26	486	3269	24599	1	1	// GgaAffx.21436.1.S1_s_at // Gga.8164.1.S1_a_at // Gga.13927.1.S1_at // Gga.1313.1.S1_s_at // GgaAffx.23767.1.S1_at // Gga.4954.2.S1_a_at // Gga.4371.1.S1_s_at // GgaAffx.10617.2.S1_s_at // GgaAffx.4780.1.S1_at // GgaAffx.20792.1.S1_s_at // Gga.19934.1.S1_at // Gga.2603.1.S1_at // GgaAffx.11648.1.S1_at // Gga.276.1.S1_at // Gga.13146.1.S1_at // Gga.916.1.S1_at // Gga.701.1.S1_at // Gga.723.1.S1_…
GO:0042180	P	cellular ketone metabolic process	13	486	1413	24599	1	1	// GgaAffx.378.1.S1_at // GgaAffx.22748.1.S1_at // Gga.9179.1.S1_at // GgaAffx.9971.2.S1_s_at // Gga.1758.1.S1_at // Gga.10928.1.S1_at // GgaAffx.6712.2.S1_s_at // GgaAffx.8757.1.S1_at // GgaAffx.26700.1.S1_s_at // Gga.1193.1.S1_at // Gga.4401.1.S1_a_at // GgaAffx.5597.1.S1_at // Gga.5396.1.S1_at
GO:0043170	P	macromolecule metabolic process	91	486	6662	24599	1	1	// GgaAffx.21436.1.S1_s_at // GgaAffx.25534.1.S1_s_at // Gga.11830.1.S1_at // Gga.13927.1.S1_at // Gga.4374.1.S1_a_at // GgaAffx.23767.1.S1_at // Gga.4954.2.S1_a_at // Gga.6964.1.S1_at // Gga.1193.1.S1_at // Gga.4371.1.S1_s_at // GgaAffx.9789.1.S1_at // Gga.12120.1.S1_at // Gga.9179.1.S1_at // Gga.2603.1.S1_at // GgaAffx.11648.1.S1_at // Gga.276.1.S1_at // GgaAffx.2373.1.S1_s_at // Gga.13146.1.S1…
GO:0043436	P	oxoacid metabolic process	13	486	1373	24599	1	1	// GgaAffx.378.1.S1_at // GgaAffx.22748.1.S1_at // Gga.9179.1.S1_at // GgaAffx.9971.2.S1_s_at // Gga.1758.1.S1_at // Gga.10928.1.S1_at // GgaAffx.6712.2.S1_s_at // GgaAffx.8757.1.S1_at // GgaAffx.26700.1.S1_s_at // Gga.1193.1.S1_at // Gga.4401.1.S1_a_at // GgaAffx.5597.1.S1_at // Gga.5396.1.S1_at
GO:0044106	P	cellular amine metabolic process	9	486	1057	24599	1	1	// GgaAffx.378.1.S1_at // GgaAffx.22748.1.S1_at // Gga.9179.1.S1_at // GgaAffx.9971.2.S1_s_at // GgaAffx.6712.2.S1_s_at // GgaAffx.8757.1.S1_at // Gga.1193.1.S1_at // GgaAffx.26700.1.S1_s_at // GgaAffx.5597.1.S1_at
GO:0044237	P	cellular metabolic process	82	486	7549	24599	1	1	// GgaAffx.21436.1.S1_s_at // Gga.2965.1.S1_at // Gga.606.1.S1_at // Gga.10606.1.S1_at // GgaAffx.968.3.S1_s_at // Gga.7148.2.A1_at // GgaAffx.6712.2.S1_s_at // GgaAffx.11885.1.S1_s_at // Gga.11830.1.S1_at // Gga.8164.1.S1_a_at // Gga.13927.1.S1_at // Gga.1313.1.S1_s_at // GgaAffx.23767.1.S1_at // GgaAffx.12136.1.S1_s_at // Gga.4954.2.S1_a_at // GgaAffx.12938.7.S1_s_at // Gga.6964.1.S1_at // Gga.…
GO:0044238	P	primary metabolic process	105	486	7849	24599	1	1	// GgaAffx.21436.1.S1_s_at // GgaAffx.25534.1.S1_s_at // Gga.11830.1.S1_at // Gga.13927.1.S1_at // Gga.4374.1.S1_a_at // GgaAffx.23767.1.S1_at // Gga.4954.2.S1_a_at // GgaAffx.12938.7.S1_s_at // Gga.6964.1.S1_at // Gga.1193.1.S1_at // Gga.4371.1.S1_s_at // Gga.12120.1.S1_at // Gga.9179.1.S1_at // Gga.6612.2.A1_at // Gga.2603.1.S1_at // Gga.7148.1.S1_at // Gga.276.1.S1_at // Gga.739.1.S1_at // Gga…
GO:0044249	P	cellular biosynthetic process	35	486	4139	24599	1	1	// GgaAffx.21436.1.S1_s_at // Gga.2965.1.S1_at // Gga.7148.2.A1_at // Gga.8164.1.S1_a_at // Gga.13927.1.S1_at // Gga.1313.1.S1_s_at // GgaAffx.23767.1.S1_at // Gga.4954.2.S1_a_at // Gga.4371.1.S1_s_at // GgaAffx.10617.2.S1_s_at // GgaAffx.4780.1.S1_at // Gga.13146.1.S1_at // Gga.19934.1.S1_at // Gga.2603.1.S1_at // Gga.7148.1.S1_at // GgaAffx.22378.1.S1_s_at // Gga.5528.1.S1_at // GgaAffx.20792.1…
GO:0044260	P	cellular macromolecule metabolic process	66	486	5891	24599	1	1	// GgaAffx.21436.1.S1_s_at // Gga.2965.1.S1_at // Gga.606.1.S1_at // Gga.10606.1.S1_at // GgaAffx.968.3.S1_s_at // GgaAffx.12136.1.S1_s_at // GgaAffx.6712.2.S1_s_at // GgaAffx.11885.1.S1_s_at // Gga.11830.1.S1_at // Gga.8164.1.S1_a_at // Gga.13927.1.S1_at // Gga.1313.1.S1_s_at // GgaAffx.23767.1.S1_at // Gga.4954.2.S1_a_at // Gga.6964.1.S1_at // Gga.1193.1.S1_at // Gga.4371.1.S1_s_at // GgaAffx.1…
GO:0045449	P	regulation of transcription	16	486	2142	24599	1	1	// GgaAffx.21436.1.S1_s_at // Gga.4371.1.S1_s_at // GgaAffx.20792.1.S1_s_at // Gga.916.1.S1_at // Gga.8164.1.S1_a_at // Gga.1313.1.S1_s_at // Gga.276.1.S1_at // GgaAffx.23767.1.S1_at // Gga.4954.2.S1_a_at // Gga.7100.1.S1_at // Gga.19934.1.S1_at // Gga.2603.1.S1_at // GgaAffx.11648.1.S1_at // Gga.578.1.S1_at // GgaAffx.4780.1.S1_at // Gga.5528.1.S1_at
GO:0046907	P	intracellular transport	6	486	721	24599	1	1	// GgaAffx.2373.1.S1_s_at // Gga.8164.1.S1_a_at // GgaAffx.7443.1.S1_at // GgaAffx.11648.1.S1_at // Gga.11948.2.S1_a_at // Gga.4414.1.S1_s_at
GO:0051171	P	regulation of nitrogen compound metabolic process	22	486	2398	24599	1	1	// GgaAffx.21436.1.S1_s_at // Gga.2965.1.S1_at // Gga.8164.1.S1_a_at // Gga.1313.1.S1_s_at // GgaAffx.23767.1.S1_at // Gga.4954.2.S1_a_at // Gga.4371.1.S1_s_at // GgaAffx.4780.1.S1_at // GgaAffx.8515.1.S1_at // Gga.19934.1.S1_at // Gga.2603.1.S1_at // GgaAffx.11648.1.S1_at // Gga.276.1.S1_at // GgaAffx.20792.1.S1_s_at // Gga.916.1.S1_at // Gga.701.1.S1_at // Gga.723.1.S1_a_at // Gga.701.1.S1_s_at…
GO:0051252	P	regulation of RNA metabolic process	19	486	2021	24599	1	1	// GgaAffx.21436.1.S1_s_at // Gga.4371.1.S1_s_at // GgaAffx.20792.1.S1_s_at // Gga.916.1.S1_at // Gga.8164.1.S1_a_at // Gga.701.1.S1_at // Gga.1313.1.S1_s_at // Gga.703.1.S1_at // Gga.701.1.S1_s_at // Gga.276.1.S1_at // GgaAffx.23767.1.S1_at // Gga.4954.2.S1_a_at // Gga.7100.1.S1_at // Gga.19934.1.S1_at // Gga.2603.1.S1_at // GgaAffx.11648.1.S1_at // Gga.578.1.S1_at // GgaAffx.4780.1.S1_at // Gga…
GO:0060255	P	regulation of macromolecule metabolic process	33	486	2704	24599	1	1	// GgaAffx.21436.1.S1_s_at // Gga.2965.1.S1_at // Gga.10606.1.S1_at // Gga.8164.1.S1_a_at // Gga.11645.2.S1_a_at // Gga.1313.1.S1_s_at // GgaAffx.23767.1.S1_at // Gga.4954.2.S1_a_at // Gga.4371.1.S1_s_at // GgaAffx.10617.2.S1_s_at // GgaAffx.4780.1.S1_at // GgaAffx.9789.1.S1_at // GgaAffx.9788.1.S1_at // GgaAffx.8515.1.S1_at // Gga.19934.1.S1_at // Gga.2603.1.S1_at // GgaAffx.11648.1.S1_at // Gga…
GO:0080090	P	regulation of primary metabolic process	29	486	2770	24599	1	1	// GgaAffx.21436.1.S1_s_at // Gga.2965.1.S1_at // Gga.10606.1.S1_at // Gga.8164.1.S1_a_at // Gga.11645.2.S1_a_at // Gga.1313.1.S1_s_at // GgaAffx.23767.1.S1_at // Gga.4954.2.S1_a_at // Gga.4371.1.S1_s_at // GgaAffx.4780.1.S1_at // Gga.5396.1.S1_at // GgaAffx.9788.1.S1_at // GgaAffx.8515.1.S1_at // Gga.19934.1.S1_at // Gga.2603.1.S1_at // GgaAffx.11648.1.S1_at // Gga.5528.1.S1_at // GgaAffx.20792.…
GO:0001608	F	nucleotide receptor activity, G-protein coupled	8	486	50	24599	6.3e-06	0.00025	// GgaAffx.3477.1.S1_at // Gga.1092.1.S1_s_at // GgaAffx.10807.1.S1_at // GgaAffx.13005.1.S1_at // GgaAffx.6562.1.A1_at // GgaAffx.10808.1.S1_at // GgaAffx.6562.1.S1_at // Gga.9880.1.S1_at
GO:0001614	F	purinergic nucleotide receptor activity	8	486	51	24599	7.3e-06	0.00025	// GgaAffx.3477.1.S1_at // Gga.1092.1.S1_s_at // GgaAffx.10807.1.S1_at // GgaAffx.13005.1.S1_at // GgaAffx.6562.1.A1_at // GgaAffx.10808.1.S1_at // GgaAffx.6562.1.S1_at // Gga.9880.1.S1_at
GO:0016502	F	nucleotide receptor activity	8	486	51	24599	7.3e-06	0.00025	// GgaAffx.3477.1.S1_at // Gga.1092.1.S1_s_at // GgaAffx.10807.1.S1_at // GgaAffx.13005.1.S1_at // GgaAffx.6562.1.A1_at // GgaAffx.10808.1.S1_at // GgaAffx.6562.1.S1_at // Gga.9880.1.S1_at
GO:0003823	F	antigen binding	8	486	59	24599	2.2e-05	0.00057	// Gga.4330.1.S1_at // Gga.4110.11.S1_x_at // GgaAffx.8515.1.S1_at // Gga.5077.1.S1_at // Gga.4110.10.S1_x_at // Gga.4110.4.S1_x_at // Gga.4110.12.S1_a_at // Gga.4110.4.S1_a_at
GO:0005102	F	receptor binding	29	486	661	24599	0.00011	0.0022	// Gga.2965.1.S1_at // Gga.10606.1.S1_at // Gga.998.2.S1_a_at // Gga.2510.1.S1_at // Gga.3027.1.S1_at // Gga.916.1.S2_at // Gga.4051.1.S1_at // Gga.9133.1.S1_at // GgaAffx.25534.1.S1_s_at // GgaAffx.9461.1.S1_at // Gga.3259.1.S1_at // GgaAffx.25386.2.S1_s_at // Gga.1020.1.S1_at // Gga.19.1.S1_at // Gga.566.1.S1_at // GgaAffx.2373.1.S1_s_at // Gga.916.1.S1_at // GgaAffx.25386.1.S1_at // Gga.701.1.…
GO:0004871	F	signal transducer activity	66	486	2059	24599	0.00027	0.004	// GgaAffx.3477.1.S1_at // Gga.12039.1.S1_a_at // GgaAffx.12851.1.S1_s_at // Gga.7148.2.A1_at // Gga.998.2.S1_a_at // GgaAffx.7443.1.S1_at // GgaAffx.7251.1.S1_at // GgaAffx.1027.1.S1_at // Gga.9813.1.S1_at // Gga.1193.1.S1_at // Gga.4458.1.S1_at // Gga.6529.1.S1_at // GgaAffx.4780.1.S1_at // GgaAffx.10617.2.S1_s_at // GgaAffx.9789.1.S1_at // Gga.4185.1.S2_at // GgaAffx.26385.1.S1_s_at // Gga.988…
GO:0060089	F	molecular transducer activity	66	486	2059	24599	0.00027	0.004	// GgaAffx.3477.1.S1_at // Gga.12039.1.S1_a_at // GgaAffx.12851.1.S1_s_at // Gga.7148.2.A1_at // Gga.998.2.S1_a_at // GgaAffx.7443.1.S1_at // GgaAffx.7251.1.S1_at // GgaAffx.1027.1.S1_at // Gga.9813.1.S1_at // Gga.1193.1.S1_at // Gga.4458.1.S1_at // Gga.6529.1.S1_at // GgaAffx.4780.1.S1_at // GgaAffx.10617.2.S1_s_at // GgaAffx.9789.1.S1_at // Gga.4185.1.S2_at // GgaAffx.26385.1.S1_s_at // Gga.988…
GO:0005178	F	integrin binding	6	486	47	24599	0.00033	0.0042	// Gga.2965.1.S1_at // Gga.4051.1.S1_at // GgaAffx.25229.1.S1_at // GgaAffx.25534.1.S1_s_at // Gga.566.1.S1_at // GgaAffx.9461.1.S1_at
GO:0005126	F	cytokine receptor binding	8	486	89	24599	0.00042	0.0043	// Gga.3027.1.S1_at // Gga.9133.1.S1_at // Gga.916.1.S1_at // Gga.19.1.S1_at // Gga.4359.1.S1_s_at // Gga.296.1.S1_at // Gga.7100.1.S1_at // Gga.1020.1.S1_at
GO:0032403	F	protein complex binding	10	486	137	24599	0.00045	0.0043	// Gga.2965.1.S1_at // Gga.4051.1.S1_at // GgaAffx.25229.1.S1_at // Gga.998.2.S1_a_at // GgaAffx.25386.1.S1_at // GgaAffx.25534.1.S1_s_at // Gga.566.1.S1_at // GgaAffx.9461.1.S1_at // GgaAffx.25386.2.S1_s_at // Gga.6529.1.S1_at
GO:0045028	F	purinergic nucleotide receptor activity, G-protein coupled	6	486	50	24599	0.00046	0.0043	// GgaAffx.3477.1.S1_at // Gga.1092.1.S1_s_at // GgaAffx.13005.1.S1_at // GgaAffx.10808.1.S1_at // GgaAffx.10807.1.S1_at // Gga.9880.1.S1_at
GO:0004715	F	non-membrane spanning protein tyrosine kinase activity	5	486	47	24599	0.0024	0.02	// GgaAffx.8960.1.S1_at // GgaAffx.11885.1.S1_s_at // GgaAffx.968.3.S1_s_at // Gga.4350.1.S1_at // Gga.9541.1.S1_at
GO:0019955	F	cytokine binding	6	486	75	24599	0.0038	0.03	// GgaAffx.24185.1.S1_at // GgaAffx.7589.1.S1_at // GgaAffx.8515.1.S1_at // GgaAffx.7251.1.S1_at // Gga.21.1.S1_a_at // Gga.9882.1.S1_at
GO:0004872	F	receptor activity	48	486	1631	24599	0.0068	0.05	// GgaAffx.3477.1.S1_at // Gga.12039.1.S1_a_at // GgaAffx.12851.1.S1_s_at // GgaAffx.12136.1.S1_s_at // Gga.998.2.S1_a_at // Gga.566.1.S1_at // GgaAffx.7251.1.S1_at // GgaAffx.1027.1.S1_at // Gga.1193.1.S1_at // Gga.4458.1.S1_at // Gga.6529.1.S1_at // GgaAffx.10617.2.S1_s_at // Gga.4185.1.S2_at // GgaAffx.26385.1.S1_s_at // Gga.9880.1.S1_at // Gga.12516.1.S1_s_at // GgaAffx.11864.1.S1_at // Gga.1…
GO:0004888	F	transmembrane receptor activity	30	486	924	24599	0.0078	0.054	// GgaAffx.3477.1.S1_at // Gga.12039.1.S1_a_at // GgaAffx.12851.1.S1_s_at // GgaAffx.12136.1.S1_s_at // Gga.998.2.S1_a_at // GgaAffx.7251.1.S1_at // Gga.1193.1.S1_at // Gga.4458.1.S1_at // Gga.6529.1.S1_at // GgaAffx.10617.2.S1_s_at // GgaAffx.24185.1.S1_at // GgaAffx.11864.1.S1_at // Gga.1092.1.S1_s_at // GgaAffx.7589.1.S1_at // GgaAffx.8515.1.S1_at // GgaAffx.6562.1.A1_at // Gga.539.1.S1_at // …
GO:0004857	F	enzyme inhibitor activity	12	486	278	24599	0.011	0.069	// Gga.198.1.S1_at // Gga.2965.1.S1_at // Gga.888.1.S1_at // Gga.10606.1.S1_at // Gga.7788.1.S1_at // Gga.11865.1.S1_at // Gga.2510.1.S1_at // Gga.4884.1.S1_at // Gga.7011.1.S1_a_at // Gga.11824.1.S1_at // Gga.11456.1.S1_at // Gga.4105.2.S1_a_at
GO:0005125	F	cytokine activity	5	486	71	24599	0.014	0.082	// Gga.916.1.S2_at // Gga.1020.1.S1_at // Gga.296.1.S1_at // Gga.7100.1.S1_at // Gga.9133.1.S1_at
GO:0005525	F	GTP binding	14	486	382	24599	0.023	0.13	// GgaAffx.26385.1.S1_s_at // Gga.18469.1.S1_s_at // Gga.6387.1.S1_at // GgaAffx.3241.1.S1_at // Gga.178.1.S1_s_at // Gga.3154.1.S1_at // Gga.8164.1.S1_a_at // Gga.217.1.S1_x_at // GgaAffx.26353.1.S1_at // Gga.131.1.S1_at // GgaAffx.26702.1.S1_s_at // GgaAffx.23145.3.S1_s_at // GgaAffx.26353.1.S1_s_at // Gga.6360.1.S1_at
GO:0005085	F	guanyl-nucleotide exchange factor activity	12	486	313	24599	0.024	0.13	// GgaAffx.26385.1.S1_s_at // Gga.18469.1.S1_s_at // GgaAffx.11771.1.S1_at // GgaAffx.25386.1.S1_at // GgaAffx.3442.2.S1_s_at // GgaAffx.11713.1.S1_s_at // Gga.18945.1.S1_at // GgaAffx.26702.1.S1_s_at // GgaAffx.12948.1.S1_s_at // GgaAffx.25386.2.S1_s_at // Gga.12335.2.S1_s_at // GgaAffx.23145.3.S1_s_at
GO:0032561	F	guanyl ribonucleotide binding	14	486	395	24599	0.029	0.15	// GgaAffx.26385.1.S1_s_at // Gga.18469.1.S1_s_at // Gga.6387.1.S1_at // GgaAffx.3241.1.S1_at // Gga.178.1.S1_s_at // Gga.3154.1.S1_at // Gga.8164.1.S1_a_at // Gga.217.1.S1_x_at // GgaAffx.26353.1.S1_at // Gga.131.1.S1_at // GgaAffx.26702.1.S1_s_at // GgaAffx.23145.3.S1_s_at // GgaAffx.26353.1.S1_s_at // Gga.6360.1.S1_at
GO:0019001	F	guanyl nucleotide binding	14	486	400	24599	0.032	0.15	// GgaAffx.26385.1.S1_s_at // Gga.18469.1.S1_s_at // Gga.6387.1.S1_at // GgaAffx.3241.1.S1_at // Gga.178.1.S1_s_at // Gga.3154.1.S1_at // Gga.8164.1.S1_a_at // Gga.217.1.S1_x_at // GgaAffx.26353.1.S1_at // Gga.131.1.S1_at // GgaAffx.26702.1.S1_s_at // GgaAffx.23145.3.S1_s_at // GgaAffx.26353.1.S1_s_at // Gga.6360.1.S1_at
GO:0004866	F	endopeptidase inhibitor activity	8	486	198	24599	0.045	0.21	// Gga.198.1.S1_at // Gga.2965.1.S1_at // Gga.888.1.S1_at // Gga.11865.1.S1_at // Gga.2510.1.S1_at // Gga.11824.1.S1_at // Gga.11456.1.S1_at // Gga.4105.2.S1_a_at
GO:0030414	F	peptidase inhibitor activity	8	486	210	24599	0.06	0.27	// Gga.198.1.S1_at // Gga.2965.1.S1_at // Gga.888.1.S1_at // Gga.11865.1.S1_at // Gga.2510.1.S1_at // Gga.11824.1.S1_at // Gga.11456.1.S1_at // Gga.4105.2.S1_a_at
GO:0030246	F	carbohydrate binding	10	486	294	24599	0.071	0.31	// Gga.5585.1.S1_at // GgaAffx.11258.1.S1_s_at // Gga.1360.1.S1_at // Gga.3572.1.S2_s_at // Gga.701.1.S1_at // Gga.854.1.S1_a_at // Gga.12186.1.S1_at // GgaAffx.11258.2.S1_s_at // Gga.3572.1.S1_at // Gga.2696.1.S1_at
GO:0003779	F	actin binding	14	486	462	24599	0.081	0.33	// Gga.16589.1.S1_at // Gga.4848.1.S1_a_at // Gga.13442.1.S1_at // Gga.4451.1.S1_at // Gga.4988.2.S1_a_at // GgaAffx.12091.1.S1_at // GgaAffx.10876.2.S1_s_at // Gga.701.1.S1_at // Gga.1009.2.S1_s_at // Gga.1294.1.S1_at // GgaAffx.21017.1.S1_s_at // Gga.1009.1.S1_s_at // Gga.1350.1.S1_at // GgaAffx.9008.1.S1_s_at
GO:0005543	F	phospholipid binding	8	486	227	24599	0.085	0.33	// GgaAffx.11658.1.S1_s_at // GgaAffx.26768.1.S1_s_at // GgaAffx.7943.1.S1_s_at // Gga.4884.1.S1_at // Gga.1168.1.S1_at // Gga.1099.1.S1_at // Gga.12335.2.S1_s_at // Gga.2696.1.S1_at
GO:0004930	F	G-protein coupled receptor activity	15	486	509	24599	0.088	0.33	// GgaAffx.3477.1.S1_at // Gga.10829.1.S1_s_at // GgaAffx.24611.2.S1_s_at // GgaAffx.11864.1.S1_at // Gga.1092.1.S1_s_at // GgaAffx.6562.1.S1_at // GgaAffx.7589.1.S1_at // GgaAffx.13005.1.S1_at // GgaAffx.6562.1.A1_at // Gga.11395.1.S1_at // GgaAffx.12851.1.S1_s_at // GgaAffx.7251.1.S1_at // GgaAffx.10807.1.S1_at // Gga.9880.1.S1_at // GgaAffx.10808.1.S1_at
GO:0004620	F	phospholipase activity	5	486	124	24599	0.1	0.36	// GgaAffx.7420.1.S1_at // GgaAffx.3425.1.S1_at // Gga.7148.1.S1_at // GgaAffx.22378.1.S1_s_at // Gga.7148.2.A1_at
GO:0005089	F	Rho guanyl-nucleotide exchange factor activity	7	486	202	24599	0.11	0.36	// GgaAffx.3442.2.S1_s_at // GgaAffx.25386.1.S1_at // GgaAffx.11771.1.S1_at // GgaAffx.11713.1.S1_s_at // Gga.18945.1.S1_at // GgaAffx.26702.1.S1_s_at // GgaAffx.25386.2.S1_s_at
GO:0008081	F	phosphoric diester hydrolase activity	5	486	127	24599	0.11	0.36	// GgaAffx.7420.1.S1_at // GgaAffx.3425.1.S1_at // Gga.7148.1.S1_at // GgaAffx.22378.1.S1_s_at // Gga.7148.2.A1_at
GO:0030234	F	enzyme regulator activity	27	486	1044	24599	0.11	0.36	// Gga.2965.1.S1_at // Gga.10606.1.S1_at // GgaAffx.22748.1.S1_at // Gga.2510.1.S1_at // Gga.12335.2.S1_s_at // GgaAffx.23145.3.S1_s_at // Gga.11456.1.S1_at // GgaAffx.26385.1.S1_s_at // GgaAffx.12684.1.S1_s_at // GgaAffx.3442.2.S1_s_at // GgaAffx.26702.1.S1_s_at // GgaAffx.25386.2.S1_s_at // Gga.18469.1.S1_s_at // Gga.198.1.S1_at // Gga.888.1.S1_at // Gga.7788.1.S1_at // GgaAffx.25386.1.S1_at //…
GO:0005088	F	Ras guanyl-nucleotide exchange factor activity	7	486	217	24599	0.14	0.45	// GgaAffx.3442.2.S1_s_at // GgaAffx.25386.1.S1_at // GgaAffx.11771.1.S1_at // GgaAffx.11713.1.S1_s_at // Gga.18945.1.S1_at // GgaAffx.26702.1.S1_s_at // GgaAffx.25386.2.S1_s_at
GO:0005529	F	sugar binding	6	486	181	24599	0.15	0.45	// Gga.5585.1.S1_at // Gga.854.1.S1_a_at // Gga.1360.1.S1_at // GgaAffx.11258.2.S1_s_at // GgaAffx.11258.1.S1_s_at // Gga.2696.1.S1_at
GO:0008092	F	cytoskeletal protein binding	17	486	644	24599	0.15	0.45	// Gga.12120.1.S1_at // Gga.16589.1.S1_at // Gga.4848.1.S1_a_at // GgaAffx.12091.1.S1_at // Gga.4451.1.S1_at // Gga.4988.2.S1_a_at // Gga.13442.1.S1_at // GgaAffx.10876.2.S1_s_at // Gga.701.1.S1_at // Gga.1009.2.S1_s_at // Gga.1294.1.S1_at // GgaAffx.21017.1.S1_s_at // Gga.1009.1.S1_s_at // Gga.1350.1.S1_at // GgaAffx.9008.1.S1_s_at // Gga.4350.1.S1_at // Gga.4350.1.S2_at
GO:0019899	F	enzyme binding	11	486	389	24599	0.16	0.45	// GgaAffx.26385.1.S1_s_at // Gga.12120.1.S1_at // GgaAffx.21398.1.S1_at // Gga.10606.1.S1_at // GgaAffx.25229.1.S1_at // GgaAffx.4393.3.S1_s_at // Gga.871.1.S1_at // GgaAffx.26702.1.S1_s_at // Gga.1193.1.S1_at // Gga.18469.1.S1_s_at // GgaAffx.23145.3.S1_s_at
GO:0035091	F	phosphoinositide binding	5	486	144	24599	0.16	0.45	// GgaAffx.11658.1.S1_s_at // Gga.12335.2.S1_s_at // GgaAffx.26768.1.S1_s_at // GgaAffx.7943.1.S1_s_at // Gga.2696.1.S1_at
GO:0016298	F	lipase activity	5	486	146	24599	0.17	0.46	// GgaAffx.7420.1.S1_at // GgaAffx.3425.1.S1_at // Gga.7148.1.S1_at // GgaAffx.22378.1.S1_s_at // Gga.7148.2.A1_at
GO:0051020	F	GTPase binding	5	486	147	24599	0.17	0.46	// GgaAffx.26385.1.S1_s_at // Gga.18469.1.S1_s_at // GgaAffx.21398.1.S1_at // GgaAffx.23145.3.S1_s_at // GgaAffx.26702.1.S1_s_at
GO:0046983	F	protein dimerization activity	11	486	421	24599	0.22	0.58	// GgaAffx.21436.1.S1_s_at // Gga.566.1.S1_at // GgaAffx.25229.1.S1_at // GgaAffx.12136.1.S1_s_at // Gga.998.2.S1_a_at // GgaAffx.7943.1.S1_s_at // Gga.854.1.S1_a_at // GgaAffx.9461.1.S1_at // Gga.7100.1.S1_at // Gga.2603.1.S1_at // Gga.6713.1.S1_at
GO:0005516	F	calmodulin binding	5	486	164	24599	0.23	0.58	// Gga.9179.1.S1_at // Gga.4988.2.S1_a_at // Gga.1294.1.S1_at // Gga.16589.1.S1_at // GgaAffx.21017.1.S1_s_at
GO:0030695	F	GTPase regulator activity	15	486	613	24599	0.24	0.6	// GgaAffx.26385.1.S1_s_at // GgaAffx.25386.2.S1_s_at // GgaAffx.23145.3.S1_s_at // GgaAffx.22748.1.S1_at // GgaAffx.11771.1.S1_at // GgaAffx.25386.1.S1_at // GgaAffx.3442.2.S1_s_at // GgaAffx.11713.1.S1_s_at // Gga.18945.1.S1_at // GgaAffx.26702.1.S1_s_at // GgaAffx.12948.1.S1_s_at // Gga.18469.1.S1_s_at // Gga.12335.2.S1_s_at // GgaAffx.12684.1.S1_s_at // GgaAffx.5597.1.S1_at
GO:0060589	F	nucleoside-triphosphatase regulator activity	15	486	621	24599	0.26	0.63	// GgaAffx.26385.1.S1_s_at // GgaAffx.25386.2.S1_s_at // GgaAffx.23145.3.S1_s_at // GgaAffx.22748.1.S1_at // GgaAffx.11771.1.S1_at // GgaAffx.25386.1.S1_at // GgaAffx.3442.2.S1_s_at // GgaAffx.11713.1.S1_s_at // Gga.18945.1.S1_at // GgaAffx.26702.1.S1_s_at // GgaAffx.12948.1.S1_s_at // Gga.18469.1.S1_s_at // Gga.12335.2.S1_s_at // GgaAffx.12684.1.S1_s_at // GgaAffx.5597.1.S1_at
GO:0004713	F	protein tyrosine kinase activity	6	486	230	24599	0.31	0.73	// Gga.12039.1.S1_a_at // GgaAffx.968.3.S1_s_at // GgaAffx.8960.1.S1_at // GgaAffx.11885.1.S1_s_at // Gga.9541.1.S1_at // Gga.4350.1.S1_at
GO:0005509	F	calcium ion binding	23	486	1052	24599	0.35	0.81	// Gga.7148.2.A1_at // Gga.11830.1.S1_at // Gga.566.1.S1_at // GgaAffx.10876.2.S1_s_at // GgaAffx.11429.1.S1_s_at // GgaAffx.3425.1.S1_at // GgaAffx.4780.1.S1_at // GgaAffx.25192.2.S1_s_at // Gga.12800.1.S1_at // GgaAffx.1712.1.S1_at // GgaAffx.9461.1.S1_at // Gga.1099.1.S1_at // Gga.7148.1.S1_at // GgaAffx.22378.1.S1_s_at // Gga.198.1.S1_at // Gga.540.1.S1_at // Gga.4451.1.S1_at // GgaAffx.12948…
GO:0005083	F	small GTPase regulator activity	10	486	440	24599	0.37	0.86	// GgaAffx.22748.1.S1_at // GgaAffx.3442.2.S1_s_at // GgaAffx.25386.1.S1_at // GgaAffx.11771.1.S1_at // GgaAffx.11713.1.S1_s_at // Gga.18945.1.S1_at // GgaAffx.26702.1.S1_s_at // GgaAffx.25386.2.S1_s_at // Gga.12335.2.S1_s_at // GgaAffx.5597.1.S1_at
GO:0005506	F	iron ion binding	7	486	338	24599	0.5	1	// Gga.2551.2.S1_s_at // GgaAffx.10393.1.S1_at // GgaAffx.25386.1.S1_at // Gga.2551.2.S1_a_at // Gga.2909.1.S1_at // GgaAffx.25386.2.S1_s_at // Gga.4981.1.S1_s_at
GO:0008289	F	lipid binding	10	486	512	24599	0.56	1	// GgaAffx.11658.1.S1_s_at // GgaAffx.6712.2.S1_s_at // GgaAffx.26768.1.S1_s_at // GgaAffx.7943.1.S1_s_at // Gga.4884.1.S1_at // Gga.1168.1.S1_at // Gga.1099.1.S1_at // GgaAffx.26700.1.S1_s_at // Gga.12335.2.S1_s_at // Gga.2696.1.S1_at
GO:0043565	F	sequence-specific DNA binding	11	486	568	24599	0.57	1	// GgaAffx.21436.1.S1_s_at // Gga.4498.1.S1_s_at // GgaAffx.20792.1.S1_s_at // Gga.12166.1.S1_at // Gga.1313.1.S1_s_at // GgaAffx.11787.1.S1_at // Gga.744.1.S1_at // Gga.4954.2.S1_a_at // Gga.7100.1.S1_at // Gga.2603.1.S1_at // GgaAffx.11648.1.S1_at
GO:0042578	F	phosphoric ester hydrolase activity	8	486	415	24599	0.58	1	// GgaAffx.378.1.S1_at // Gga.7148.2.A1_at // GgaAffx.7420.1.S1_at // GgaAffx.1032.1.S1_s_at // Gga.1193.1.S1_at // GgaAffx.3425.1.S1_at // Gga.7148.1.S1_at // GgaAffx.22378.1.S1_s_at
GO:0004175	F	endopeptidase activity	6	486	341	24599	0.67	1	// Gga.12120.1.S1_at // GgaAffx.8628.1.S1_at // Gga.6223.1.S1_at // Gga.6553.1.S1_at // Gga.5710.2.S1_a_at // Gga.514.1.S1_at
GO:0005515	F	protein binding	137	486	7275	24599	0.71	1	// GgaAffx.21436.1.S1_s_at // Gga.10880.1.S1_at // Gga.998.2.S1_a_at // GgaAffx.7443.1.S1_at // GgaAffx.7251.1.S1_at // Gga.4954.2.S1_a_at // Gga.1193.1.S1_at // Gga.4051.1.S1_at // Gga.6529.1.S1_at // GgaAffx.9008.1.S1_s_at // GgaAffx.26385.1.S1_s_at // Gga.12120.1.S1_at // Gga.9179.1.S1_at // Gga.1311.5.S1_s_at // Gga.1099.1.S1_at // Gga.2603.1.S1_at // GgaAffx.11648.1.S1_at // Gga.2696.1.S1_at…
GO:0042802	F	identical protein binding	7	486	435	24599	0.76	1	// GgaAffx.25229.1.S1_at // GgaAffx.10876.2.S1_s_at // Gga.854.1.S1_a_at // Gga.6246.1.S1_at // GgaAffx.9461.1.S1_at // Gga.6713.1.S1_at // Gga.4350.1.S1_at
GO:0016301	F	kinase activity	20	486	1172	24599	0.77	1	// Gga.12039.1.S1_a_at // Gga.12120.1.S1_at // GgaAffx.9971.2.S1_s_at // GgaAffx.968.3.S1_s_at // GgaAffx.4393.3.S1_s_at // Gga.2481.1.S1_at // Gga.9179.1.S1_at // Gga.7709.1.S1_at // GgaAffx.8960.1.S1_at // Gga.9541.1.S1_at // GgaAffx.6712.2.S1_s_at // Gga.11560.2.S1_a_at // Gga.4359.1.S2_s_at // GgaAffx.11885.1.S1_s_at // Gga.5607.1.S1_at // GgaAffx.26700.1.S1_s_at // GgaAffx.4938.1.S1_at // Gg…
GO:0022836	F	gated channel activity	5	486	365	24599	0.85	1	// GgaAffx.10393.1.S1_at // Gga.918.1.S1_at // Gga.11184.1.S1_at // Gga.16544.1.S1_s_at // Gga.12076.1.S1_at
GO:0004672	F	protein kinase activity	13	486	854	24599	0.86	1	// Gga.12039.1.S1_a_at // GgaAffx.9971.2.S1_s_at // GgaAffx.968.3.S1_s_at // Gga.9179.1.S1_at // Gga.7709.1.S1_at // GgaAffx.8960.1.S1_at // Gga.9541.1.S1_at // GgaAffx.6712.2.S1_s_at // GgaAffx.11885.1.S1_s_at // GgaAffx.26700.1.S1_s_at // GgaAffx.5597.1.S1_at // Gga.4350.1.S1_at // GgaAffx.22748.1.S1_at
GO:0008047	F	enzyme activator activity	5	486	377	24599	0.87	1	// GgaAffx.25386.2.S1_s_at // GgaAffx.25386.1.S1_at // GgaAffx.12684.1.S1_s_at // Gga.2965.1.S1_at // GgaAffx.11771.1.S1_at
GO:0008134	F	transcription factor binding	5	486	378	24599	0.87	1	// Gga.2603.1.S1_at // Gga.8164.1.S1_a_at // GgaAffx.20792.1.S1_s_at // Gga.5528.1.S1_at // Gga.4954.2.S1_a_at
GO:0015267	F	channel activity	7	486	507	24599	0.87	1	// Gga.198.1.S1_at // Gga.11184.1.S1_at // Gga.16544.1.S1_s_at // GgaAffx.10393.1.S1_at // Gga.918.1.S1_at // Gga.12076.1.S1_at // GgaAffx.21790.1.S1_s_at
GO:0022803	F	passive transmembrane transporter activity	7	486	507	24599	0.87	1	// Gga.198.1.S1_at // Gga.11184.1.S1_at // Gga.16544.1.S1_s_at // GgaAffx.10393.1.S1_at // Gga.918.1.S1_at // Gga.12076.1.S1_at // GgaAffx.21790.1.S1_s_at
GO:0070011	F	peptidase activity, acting on L-amino acid peptides	6	486	444	24599	0.87	1	// Gga.12120.1.S1_at // GgaAffx.8628.1.S1_at // Gga.6223.1.S1_at // Gga.6553.1.S1_at // Gga.5710.2.S1_a_at // Gga.514.1.S1_at
GO:0016788	F	hydrolase activity, acting on ester bonds	12	486	840	24599	0.9	1	// GgaAffx.378.1.S1_at // Gga.7148.2.A1_at // GgaAffx.7420.1.S1_at // Gga.11830.1.S1_at // GgaAffx.1032.1.S1_s_at // Gga.701.1.S1_at // Gga.703.1.S1_at // Gga.701.1.S1_s_at // Gga.1193.1.S1_at // GgaAffx.3425.1.S1_at // Gga.7148.1.S1_at // GgaAffx.22378.1.S1_s_at
GO:0005216	F	ion channel activity	6	486	487	24599	0.92	1	// Gga.198.1.S1_at // Gga.11184.1.S1_at // Gga.16544.1.S1_s_at // GgaAffx.10393.1.S1_at // Gga.918.1.S1_at // Gga.12076.1.S1_at
GO:0008233	F	peptidase activity	6	486	484	24599	0.92	1	// Gga.12120.1.S1_at // GgaAffx.8628.1.S1_at // Gga.6223.1.S1_at // Gga.6553.1.S1_at // Gga.5710.2.S1_a_at // Gga.514.1.S1_at
GO:0016773	F	phosphotransferase activity, alcohol group as acceptor	14	486	997	24599	0.92	1	// Gga.12039.1.S1_a_at // GgaAffx.9971.2.S1_s_at // GgaAffx.968.3.S1_s_at // Gga.9179.1.S1_at // Gga.7709.1.S1_at // GgaAffx.8960.1.S1_at // Gga.9541.1.S1_at // GgaAffx.6712.2.S1_s_at // GgaAffx.11885.1.S1_s_at // GgaAffx.26700.1.S1_s_at // GgaAffx.4938.1.S1_at // GgaAffx.5597.1.S1_at // Gga.4350.1.S1_at // GgaAffx.22748.1.S1_at
GO:0022838	F	substrate-specific channel activity	6	486	493	24599	0.92	1	// Gga.198.1.S1_at // Gga.11184.1.S1_at // Gga.16544.1.S1_s_at // GgaAffx.10393.1.S1_at // Gga.918.1.S1_at // Gga.12076.1.S1_at
GO:0003700	F	transcription factor activity	13	486	945	24599	0.93	1	// GgaAffx.21436.1.S1_s_at // Gga.3316.1.S1_s_at // GgaAffx.20792.1.S1_s_at // GgaAffx.12062.1.S1_s_at // Gga.1313.1.S1_s_at // GgaAffx.20689.1.S1_at // Gga.4954.2.S1_a_at // Gga.7100.1.S1_at // Gga.19934.1.S1_at // Gga.2603.1.S1_at // Gga.578.1.S1_at // GgaAffx.4780.1.S1_at // Gga.276.1.S1_at
GO:0005198	F	structural molecule activity	13	486	937	24599	0.93	1	// Gga.2073.1.S1_at // Gga.888.1.S1_at // Gga.13442.1.S1_at // Gga.998.2.S1_a_at // GgaAffx.25534.1.S1_s_at // Gga.540.1.S1_at // Gga.4884.1.S1_at // GgaAffx.22999.1.S1_s_at // Gga.15971.1.S1_at // Gga.1009.2.S1_s_at // Gga.9346.3.S1_a_at // Gga.1009.1.S1_s_at // Gga.11456.1.S1_at
GO:0009055	F	electron carrier activity	6	486	515	24599	0.94	1	// Gga.4110.7.S1_s_at // GgaAffx.25386.1.S1_at // Gga.217.1.S1_x_at // Gga.11645.2.S1_a_at // GgaAffx.26579.1.S1_s_at // GgaAffx.25386.2.S1_s_at
GO:0004674	F	protein serine/threonine kinase activity	7	486	608	24599	0.95	1	// GgaAffx.9971.2.S1_s_at // GgaAffx.22748.1.S1_at // Gga.9179.1.S1_at // Gga.7709.1.S1_at // GgaAffx.6712.2.S1_s_at // GgaAffx.26700.1.S1_s_at // GgaAffx.5597.1.S1_at
GO:0016772	F	transferase activity, transferring phosphorus-containing groups	22	486	1530	24599	0.95	1	// Gga.12039.1.S1_a_at // GgaAffx.22748.1.S1_at // GgaAffx.6712.2.S1_s_at // GgaAffx.11885.1.S1_s_at // Gga.13927.1.S1_at // GgaAffx.968.3.S1_s_at // Gga.12120.1.S1_at // GgaAffx.9971.2.S1_s_at // Gga.9179.1.S1_at // Gga.10201.1.S1_at // Gga.11560.2.S1_a_at // Gga.7709.1.S1_at // Gga.4359.1.S2_s_at // GgaAffx.26700.1.S1_s_at // GgaAffx.5597.1.S1_at // GgaAffx.4938.1.S1_at // GgaAffx.4393.3.S1_s_a…
GO:0017076	F	purine nucleotide binding	31	486	2138	24599	0.97	1	// Gga.6387.1.S1_at // GgaAffx.22748.1.S1_at // GgaAffx.6712.2.S1_s_at // GgaAffx.11885.1.S1_s_at // Gga.8164.1.S1_a_at // Gga.217.1.S1_x_at // Gga.1294.1.S1_at // GgaAffx.23145.3.S1_s_at // GgaAffx.26353.1.S1_s_at // GgaAffx.968.3.S1_s_at // GgaAffx.26385.1.S1_s_at // Gga.11337.1.S1_at // Gga.536.1.S1_a_at // Gga.9179.1.S1_at // GgaAffx.26702.1.S1_s_at // Gga.18469.1.S1_s_at // GgaAffx.3241.1.S1…
GO:0032553	F	ribonucleotide binding	29	486	2035	24599	0.97	1	// Gga.6387.1.S1_at // GgaAffx.22748.1.S1_at // GgaAffx.6712.2.S1_s_at // GgaAffx.11885.1.S1_s_at // Gga.8164.1.S1_a_at // Gga.217.1.S1_x_at // Gga.1294.1.S1_at // GgaAffx.23145.3.S1_s_at // GgaAffx.26353.1.S1_s_at // GgaAffx.968.3.S1_s_at // GgaAffx.26385.1.S1_s_at // Gga.11337.1.S1_at // Gga.536.1.S1_a_at // Gga.9179.1.S1_at // GgaAffx.26702.1.S1_s_at // Gga.18469.1.S1_s_at // GgaAffx.3241.1.S1…
GO:0032555	F	purine ribonucleotide binding	29	486	2035	24599	0.97	1	// Gga.6387.1.S1_at // GgaAffx.22748.1.S1_at // GgaAffx.6712.2.S1_s_at // GgaAffx.11885.1.S1_s_at // Gga.8164.1.S1_a_at // Gga.217.1.S1_x_at // Gga.1294.1.S1_at // GgaAffx.23145.3.S1_s_at // GgaAffx.26353.1.S1_s_at // GgaAffx.968.3.S1_s_at // GgaAffx.26385.1.S1_s_at // Gga.11337.1.S1_at // Gga.536.1.S1_a_at // Gga.9179.1.S1_at // GgaAffx.26702.1.S1_s_at // Gga.18469.1.S1_s_at // GgaAffx.3241.1.S1…
GO:0000166	F	nucleotide binding	35	486	2463	24599	0.98	1	// Gga.6387.1.S1_at // GgaAffx.22748.1.S1_at // GgaAffx.6712.2.S1_s_at // GgaAffx.11885.1.S1_s_at // Gga.8164.1.S1_a_at // Gga.217.1.S1_x_at // Gga.1294.1.S1_at // GgaAffx.23145.3.S1_s_at // GgaAffx.26353.1.S1_s_at // GgaAffx.968.3.S1_s_at // GgaAffx.26385.1.S1_s_at // Gga.11337.1.S1_at // Gga.536.1.S1_a_at // GgaAffx.10393.1.S1_at // GgaAffx.26702.1.S1_s_at // Gga.18469.1.S1_s_at // Gga.5528.1.S…
GO:0008324	F	cation transmembrane transporter activity	8	486	753	24599	0.98	1	// Gga.198.1.S1_at // Gga.11184.1.S1_at // GgaAffx.1584.1.S1_at // Gga.871.1.S1_at // Gga.918.1.S1_at // Gga.12076.1.S1_at // GgaAffx.1584.2.S1_s_at // GgaAffx.5539.1.S1_s_at
GO:0003723	F	RNA binding	8	486	813	24599	0.99	1	// Gga.536.1.S1_a_at // Gga.701.1.S1_at // Gga.1313.1.S1_s_at // Gga.13927.1.S1_at // Gga.4359.1.S2_s_at // Gga.4919.1.S2_at // GgaAffx.10617.2.S1_s_at // Gga.8092.1.S1_at
GO:0005215	F	transporter activity	20	486	1647	24599	0.99	1	// Gga.739.1.S1_at // Gga.198.1.S1_at // Gga.11184.1.S1_at // Gga.16544.1.S1_s_at // GgaAffx.10393.1.S1_at // GgaAffx.1584.1.S1_at // Gga.2680.1.S1_at // GgaAffx.21790.1.S1_s_at // Gga.2909.1.S1_a_at // Gga.871.1.S1_at // Gga.918.1.S1_at // Gga.3323.1.S1_s_at // Gga.2909.1.S1_at // Gga.12076.1.S1_at // GgaAffx.1584.2.S1_s_at // Gga.7278.1.S1_at // Gga.4981.1.S1_s_at // GgaAffx.5539.1.S1_s_at // G…
GO:0015075	F	ion transmembrane transporter activity	10	486	975	24599	0.99	1	// Gga.198.1.S1_at // Gga.11184.1.S1_at // Gga.16544.1.S1_s_at // GgaAffx.10393.1.S1_at // GgaAffx.1584.1.S1_at // Gga.871.1.S1_at // Gga.918.1.S1_at // Gga.12076.1.S1_at // GgaAffx.1584.2.S1_s_at // GgaAffx.5539.1.S1_s_at
GO:0001882	F	nucleoside binding	18	486	1795	24599	1	1	// Gga.11337.1.S1_at // GgaAffx.968.3.S1_s_at // Gga.536.1.S1_a_at // Gga.9179.1.S1_at // GgaAffx.11885.1.S1_s_at // GgaAffx.9971.2.S1_s_at // Gga.8164.1.S1_a_at // Gga.9541.1.S1_at // Gga.3676.1.S1_at // GgaAffx.6712.2.S1_s_at // GgaAffx.10393.1.S1_at // Gga.1294.1.S1_at // GgaAffx.8960.1.S1_at // GgaAffx.26700.1.S1_s_at // GgaAffx.4938.1.S1_at // GgaAffx.5597.1.S1_at // Gga.4350.1.S1_at // GgaA…
GO:0001883	F	purine nucleoside binding	18	486	1792	24599	1	1	// Gga.11337.1.S1_at // GgaAffx.968.3.S1_s_at // Gga.536.1.S1_a_at // Gga.9179.1.S1_at // GgaAffx.11885.1.S1_s_at // GgaAffx.9971.2.S1_s_at // Gga.8164.1.S1_a_at // Gga.9541.1.S1_at // Gga.3676.1.S1_at // GgaAffx.6712.2.S1_s_at // GgaAffx.10393.1.S1_at // Gga.1294.1.S1_at // GgaAffx.8960.1.S1_at // GgaAffx.26700.1.S1_s_at // GgaAffx.4938.1.S1_at // GgaAffx.5597.1.S1_at // Gga.4350.1.S1_at // GgaA…
GO:0003676	F	nucleic acid binding	30	486	3365	24599	1	1	// GgaAffx.21436.1.S1_s_at // Gga.11830.1.S1_at // Gga.12166.1.S1_at // Gga.13927.1.S1_at // Gga.1313.1.S1_s_at // GgaAffx.11787.1.S1_at // GgaAffx.23767.1.S1_at // Gga.4954.2.S1_a_at // Gga.4919.1.S2_at // GgaAffx.10617.2.S1_s_at // GgaAffx.4780.1.S1_at // Gga.3316.1.S1_s_at // Gga.4498.1.S1_s_at // Gga.536.1.S1_a_at // GgaAffx.20689.1.S1_at // Gga.744.1.S1_at // Gga.19934.1.S1_at // Gga.2603.1.…
GO:0003677	F	DNA binding	21	486	2138	24599	1	1	// GgaAffx.21436.1.S1_s_at // Gga.4498.1.S1_s_at // Gga.3316.1.S1_s_at // GgaAffx.20792.1.S1_s_at // GgaAffx.12062.1.S1_s_at // Gga.11830.1.S1_at // Gga.12166.1.S1_at // Gga.701.1.S1_at // Gga.1313.1.S1_s_at // GgaAffx.20689.1.S1_at // GgaAffx.11787.1.S1_at // GgaAffx.23767.1.S1_at // Gga.744.1.S1_at // Gga.4954.2.S1_a_at // Gga.7100.1.S1_at // Gga.19934.1.S1_at // Gga.2603.1.S1_at // GgaAffx.116…
GO:0003824	F	catalytic activity	68	486	6582	24599	1	1	// Gga.12039.1.S1_a_at // Gga.6387.1.S1_at // GgaAffx.968.3.S1_s_at // GgaAffx.8628.1.S1_at // GgaAffx.6712.2.S1_s_at // GgaAffx.11885.1.S1_s_at // Gga.11830.1.S1_at // Gga.13927.1.S1_at // GgaAffx.12157.1.S1_at // Gga.1363.1.S1_at // Gga.1294.1.S1_at // GgaAffx.26700.1.S1_s_at // Gga.1193.1.S1_at // GgaAffx.22748.1.S1_at // GgaAffx.12579.1.S1_at // Gga.12120.1.S1_at // GgaAffx.378.1.S1_at // Gga…
GO:0005488	F	binding	216	486	13573	24599	1	1	// GgaAffx.21436.1.S1_s_at // Gga.14078.1.S1_s_at // Gga.10880.1.S1_at // Gga.998.2.S1_a_at // GgaAffx.8515.1.S1_at // Gga.11830.1.S1_at // Gga.13927.1.S1_at // GgaAffx.11787.1.S1_at // GgaAffx.7251.1.S1_at // GgaAffx.23767.1.S1_at // Gga.4954.2.S1_a_at // Gga.1193.1.S1_at // Gga.4051.1.S1_at // Gga.6529.1.S1_at // GgaAffx.9008.1.S1_s_at // GgaAffx.9789.1.S1_at // GgaAffx.26385.1.S1_s_at // Gga.1…
GO:0005524	F	ATP binding	16	486	1654	24599	1	1	// Gga.11337.1.S1_at // GgaAffx.968.3.S1_s_at // Gga.536.1.S1_a_at // Gga.9179.1.S1_at // GgaAffx.11885.1.S1_s_at // GgaAffx.9971.2.S1_s_at // Gga.8164.1.S1_a_at // Gga.9541.1.S1_at // GgaAffx.6712.2.S1_s_at // Gga.1294.1.S1_at // GgaAffx.8960.1.S1_at // GgaAffx.26700.1.S1_s_at // GgaAffx.4938.1.S1_at // GgaAffx.5597.1.S1_at // Gga.4350.1.S1_at // GgaAffx.22748.1.S1_at
GO:0008270	F	zinc ion binding	26	486	2359	24599	1	1	// Gga.3108.1.S1_at // GgaAffx.6712.2.S1_s_at // GgaAffx.11885.1.S1_s_at // Gga.8267.2.S1_a_at // GgaAffx.12475.1.S1_at // GgaAffx.25192.2.S1_s_at // GgaAffx.1027.1.S1_at // Gga.12800.1.S1_at // GgaAffx.11429.1.S1_s_at // Gga.19934.1.S1_at // GgaAffx.11648.1.S1_at // Gga.276.1.S1_at // Gga.198.1.S1_at // Gga.7149.1.S1_at // GgaAffx.20792.1.S1_s_at // GgaAffx.26768.1.S1_s_at // Gga.3145.3.S1_a_at …
GO:0016462	F	pyrophosphatase activity	7	486	982	24599	1	1	// Gga.6387.1.S1_at // Gga.178.1.S1_s_at // Gga.3154.1.S1_at // Gga.131.1.S1_at // Gga.10923.2.S1_s_at // Gga.1294.1.S1_at // Gga.11948.2.S1_a_at
GO:0016491	F	oxidoreductase activity	6	486	768	24599	1	1	// GgaAffx.10393.1.S1_at // GgaAffx.12157.1.S1_at // Gga.6017.1.S1_s_at // Gga.5528.1.S1_at // Gga.17679.1.S1_s_at // GgaAffx.23872.1.S1_at
GO:0016740	F	transferase activity	27	486	2418	24599	1	1	// Gga.12039.1.S1_a_at // GgaAffx.22748.1.S1_at // GgaAffx.6712.2.S1_s_at // GgaAffx.11885.1.S1_s_at // Gga.13927.1.S1_at // GgaAffx.968.3.S1_s_at // Gga.12120.1.S1_at // GgaAffx.9971.2.S1_s_at // GgaAffx.8101.3.S1_at // Gga.536.1.S1_a_at // Gga.9179.1.S1_at // Gga.1035.1.S1_at // Gga.10201.1.S1_at // Gga.11560.2.S1_a_at // Gga.7709.1.S1_at // GgaAffx.26768.1.S1_s_at // Gga.3676.1.S1_at // Gga.43…
GO:0016787	F	hydrolase activity	31	486	2708	24599	1	1	// Gga.6387.1.S1_at // GgaAffx.8628.1.S1_at // Gga.11830.1.S1_at // Gga.1294.1.S1_at // Gga.1193.1.S1_at // GgaAffx.12579.1.S1_at // Gga.12120.1.S1_at // GgaAffx.378.1.S1_at // GgaAffx.7420.1.S1_at // Gga.178.1.S1_s_at // Gga.5710.2.S1_a_at // GgaAffx.25059.1.S1_at // Gga.7148.1.S1_at // GgaAffx.22378.1.S1_s_at // Gga.12233.1.S1_at // Gga.9103.1.S1_at // Gga.6223.1.S1_at // Gga.7148.2.A1_at // Gg…
GO:0016817	F	hydrolase activity, acting on acid anhydrides	7	486	995	24599	1	1	// Gga.6387.1.S1_at // Gga.178.1.S1_s_at // Gga.3154.1.S1_at // Gga.131.1.S1_at // Gga.10923.2.S1_s_at // Gga.1294.1.S1_at // Gga.11948.2.S1_a_at
GO:0016818	F	hydrolase activity, acting on acid anhydrides, in phosphorus-containing anhydrides	7	486	988	24599	1	1	// Gga.6387.1.S1_at // Gga.178.1.S1_s_at // Gga.3154.1.S1_at // Gga.131.1.S1_at // Gga.10923.2.S1_s_at // Gga.1294.1.S1_at // Gga.11948.2.S1_a_at
GO:0017111	F	nucleoside-triphosphatase activity	7	486	945	24599	1	1	// Gga.6387.1.S1_at // Gga.178.1.S1_s_at // Gga.3154.1.S1_at // Gga.131.1.S1_at // Gga.10923.2.S1_s_at // Gga.1294.1.S1_at // Gga.11948.2.S1_a_at
GO:0022857	F	transmembrane transporter activity	11	486	1185	24599	1	1	// Gga.198.1.S1_at // Gga.11184.1.S1_at // Gga.16544.1.S1_s_at // GgaAffx.10393.1.S1_at // GgaAffx.1584.1.S1_at // Gga.871.1.S1_at // Gga.918.1.S1_at // Gga.12076.1.S1_at // GgaAffx.1584.2.S1_s_at // GgaAffx.21790.1.S1_s_at // GgaAffx.5539.1.S1_s_at
GO:0022891	F	substrate-specific transmembrane transporter activity	10	486	1083	24599	1	1	// Gga.198.1.S1_at // Gga.11184.1.S1_at // Gga.16544.1.S1_s_at // GgaAffx.10393.1.S1_at // GgaAffx.1584.1.S1_at // Gga.871.1.S1_at // Gga.918.1.S1_at // Gga.12076.1.S1_at // GgaAffx.1584.2.S1_s_at // GgaAffx.5539.1.S1_s_at
GO:0022892	F	substrate-specific transporter activity	14	486	1304	24599	1	1	// Gga.198.1.S1_at // Gga.11184.1.S1_at // Gga.16544.1.S1_s_at // GgaAffx.10393.1.S1_at // GgaAffx.1584.1.S1_at // Gga.2909.1.S1_a_at // Gga.871.1.S1_at // Gga.918.1.S1_at // Gga.2909.1.S1_at // Gga.12076.1.S1_at // GgaAffx.1584.2.S1_s_at // Gga.4981.1.S1_s_at // GgaAffx.5539.1.S1_s_at // Gga.14571.1.S1_s_at
GO:0030528	F	transcription regulator activity	15	486	1373	24599	1	1	// GgaAffx.21436.1.S1_s_at // Gga.3316.1.S1_s_at // GgaAffx.20792.1.S1_s_at // GgaAffx.12062.1.S1_s_at // Gga.1313.1.S1_s_at // GgaAffx.20689.1.S1_at // Gga.276.1.S1_at // Gga.4954.2.S1_a_at // Gga.7100.1.S1_at // Gga.19934.1.S1_at // Gga.2603.1.S1_at // GgaAffx.11648.1.S1_at // Gga.578.1.S1_at // GgaAffx.4780.1.S1_at // Gga.5528.1.S1_at
GO:0030554	F	adenyl nucleotide binding	18	486	1776	24599	1	1	// Gga.11337.1.S1_at // GgaAffx.968.3.S1_s_at // Gga.536.1.S1_a_at // Gga.9179.1.S1_at // GgaAffx.11885.1.S1_s_at // GgaAffx.9971.2.S1_s_at // Gga.8164.1.S1_a_at // Gga.9541.1.S1_at // Gga.3676.1.S1_at // GgaAffx.6712.2.S1_s_at // GgaAffx.10393.1.S1_at // Gga.1294.1.S1_at // GgaAffx.8960.1.S1_at // GgaAffx.26700.1.S1_s_at // GgaAffx.4938.1.S1_at // GgaAffx.5597.1.S1_at // Gga.4350.1.S1_at // GgaA…
GO:0032559	F	adenyl ribonucleotide binding	16	486	1681	24599	1	1	// Gga.11337.1.S1_at // GgaAffx.968.3.S1_s_at // Gga.536.1.S1_a_at // Gga.9179.1.S1_at // GgaAffx.11885.1.S1_s_at // GgaAffx.9971.2.S1_s_at // Gga.8164.1.S1_a_at // Gga.9541.1.S1_at // GgaAffx.6712.2.S1_s_at // Gga.1294.1.S1_at // GgaAffx.8960.1.S1_at // GgaAffx.26700.1.S1_s_at // GgaAffx.4938.1.S1_at // GgaAffx.5597.1.S1_at // Gga.4350.1.S1_at // GgaAffx.22748.1.S1_at
GO:0043167	F	ion binding	56	486	4629	24599	1	1	// Gga.3108.1.S1_at // Gga.2551.2.S1_s_at // GgaAffx.26768.1.S1_s_at // Gga.7148.2.A1_at // GgaAffx.6712.2.S1_s_at // GgaAffx.11885.1.S1_s_at // Gga.11830.1.S1_at // Gga.566.1.S1_at // Gga.8267.2.S1_a_at // GgaAffx.21250.1.S1_s_at // GgaAffx.10876.2.S1_s_at // GgaAffx.12475.1.S1_at // GgaAffx.26700.1.S1_s_at // Gga.14988.1.S1_at // GgaAffx.4780.1.S1_at // GgaAffx.13207.1.S1_s_at // GgaAffx.10393.…
GO:0043169	F	cation binding	56	486	4580	24599	1	1	// Gga.3108.1.S1_at // Gga.2551.2.S1_s_at // GgaAffx.26768.1.S1_s_at // Gga.7148.2.A1_at // GgaAffx.6712.2.S1_s_at // GgaAffx.11885.1.S1_s_at // Gga.11830.1.S1_at // Gga.566.1.S1_at // Gga.8267.2.S1_a_at // GgaAffx.21250.1.S1_s_at // GgaAffx.10876.2.S1_s_at // GgaAffx.12475.1.S1_at // GgaAffx.26700.1.S1_s_at // Gga.14988.1.S1_at // GgaAffx.4780.1.S1_at // GgaAffx.13207.1.S1_s_at // GgaAffx.10393.…
GO:0046872	F	metal ion binding	56	486	4534	24599	1	1	// Gga.3108.1.S1_at // Gga.2551.2.S1_s_at // GgaAffx.26768.1.S1_s_at // Gga.7148.2.A1_at // GgaAffx.6712.2.S1_s_at // GgaAffx.11885.1.S1_s_at // Gga.11830.1.S1_at // Gga.566.1.S1_at // Gga.8267.2.S1_a_at // GgaAffx.21250.1.S1_s_at // GgaAffx.10876.2.S1_s_at // GgaAffx.12475.1.S1_at // GgaAffx.26700.1.S1_s_at // Gga.14988.1.S1_at // GgaAffx.4780.1.S1_at // GgaAffx.13207.1.S1_s_at // GgaAffx.10393.…
GO:0046914	F	transition metal ion binding	35	486	2855	24599	1	1	// Gga.3108.1.S1_at // Gga.2551.2.S1_s_at // GgaAffx.6712.2.S1_s_at // GgaAffx.11885.1.S1_s_at // Gga.8267.2.S1_a_at // GgaAffx.12475.1.S1_at // GgaAffx.10393.1.S1_at // GgaAffx.1027.1.S1_at // Gga.12800.1.S1_at // GgaAffx.11429.1.S1_s_at // Gga.2909.1.S1_at // Gga.19934.1.S1_at // GgaAffx.25386.2.S1_s_at // GgaAffx.11648.1.S1_at // Gga.276.1.S1_at // Gga.198.1.S1_at // Gga.7149.1.S1_at // GgaAff…
GO:0042613	C	MHC class II protein complex	8	486	23	24599	9.3e-09	7e-07	// Gga.419.1.A1_at // Gga.13336.2.S1_x_at // Gga.13336.3.S1_x_at // Gga.5048.1.A1_at // Gga.11016.1.S1_at // Gga.5137.1.S1_x_at // Gga.13336.5.S1_x_at // Gga.4414.1.S1_s_at
GO:0009897	C	external side of plasma membrane	12	486	72	24599	2.1e-08	7e-07	// GgaAffx.24185.1.S1_at // Gga.566.1.S1_at // GgaAffx.5458.1.S1_at // GgaAffx.25229.1.S1_at // GgaAffx.8515.1.S1_at // Gga.450.1.S1_at // Gga.723.1.S1_a_at // GgaAffx.9461.1.S1_at // GgaAffx.151.1.S1_s_at // Gga.4458.1.S1_at // Gga.6529.1.S1_at // Gga.2734.1.S2_at
GO:0019814	C	immunoglobulin complex	8	486	26	24599	2.8e-08	7e-07	// Gga.4330.1.S1_at // Gga.4110.11.S1_x_at // GgaAffx.25229.1.S1_at // GgaAffx.8515.1.S1_at // Gga.4458.1.S1_at // Gga.4110.4.S1_x_at // Gga.4110.12.S1_a_at // Gga.6529.1.S1_at
GO:0042611	C	MHC protein complex	8	486	28	24599	5.4e-08	1e-06	// Gga.419.1.A1_at // Gga.13336.2.S1_x_at // Gga.13336.3.S1_x_at // Gga.5048.1.A1_at // Gga.11016.1.S1_at // Gga.5137.1.S1_x_at // Gga.13336.5.S1_x_at // Gga.4414.1.S1_s_at
GO:0042101	C	T cell receptor complex	5	486	12	24599	2.2e-06	3.3e-05	// Gga.998.2.S1_a_at // GgaAffx.25386.2.S1_s_at // GgaAffx.25386.1.S1_at // GgaAffx.968.3.S1_s_at // GgaAffx.9789.1.S1_at
GO:0005581	C	collagen	8	486	75	24599	0.00013	0.0016	// Gga.198.1.S1_at // Gga.2073.1.S1_at // Gga.888.1.S1_at // GgaAffx.25229.1.S1_at // GgaAffx.25534.1.S1_s_at // Gga.566.1.S1_at // GgaAffx.22999.1.S1_s_at // GgaAffx.9461.1.S1_at
GO:0009986	C	cell surface	13	486	205	24599	0.00028	0.003	// GgaAffx.24185.1.S1_at // Gga.2965.1.S1_at // GgaAffx.5458.1.S1_at // GgaAffx.25229.1.S1_at // GgaAffx.8515.1.S1_at // Gga.450.1.S1_at // Gga.566.1.S1_at // Gga.723.1.S1_a_at // GgaAffx.9461.1.S1_at // GgaAffx.151.1.S1_s_at // Gga.4458.1.S1_at // Gga.6529.1.S1_at // Gga.2734.1.S2_at
GO:0005578	C	proteinaceous extracellular matrix	20	486	420	24599	0.0004	0.0035	// Gga.1719.1.S1_at // Gga.198.1.S1_at // Gga.540.1.S1_at // Gga.888.1.S1_at // GgaAffx.25229.1.S1_at // GgaAffx.25192.2.S1_s_at // Gga.2679.1.S1_at // Gga.2965.1.S1_at // GgaAffx.25534.1.S1_s_at // Gga.566.1.S1_at // Gga.2073.1.S1_at // Gga.701.1.S1_at // GgaAffx.22999.1.S1_s_at // Gga.12800.1.S1_at // GgaAffx.9461.1.S1_at // Gga.1776.1.S1_at // GgaAffx.1557.1.S1_at // GgaAffx.11018.1.S1_s_at //…
GO:0044420	C	extracellular matrix part	12	486	187	24599	0.00042	0.0035	// Gga.198.1.S1_at // Gga.2965.1.S1_at // Gga.888.1.S1_at // GgaAffx.25229.1.S1_at // Gga.2679.1.S1_at // GgaAffx.25534.1.S1_s_at // Gga.566.1.S1_at // Gga.2073.1.S1_at // Gga.701.1.S1_at // GgaAffx.22999.1.S1_s_at // GgaAffx.9461.1.S1_at // Gga.1776.1.S1_at
GO:0031012	C	extracellular matrix	20	486	431	24599	0.00055	0.004	// Gga.1719.1.S1_at // Gga.198.1.S1_at // Gga.540.1.S1_at // Gga.888.1.S1_at // GgaAffx.25229.1.S1_at // GgaAffx.25192.2.S1_s_at // Gga.2679.1.S1_at // Gga.2965.1.S1_at // GgaAffx.25534.1.S1_s_at // Gga.566.1.S1_at // Gga.2073.1.S1_at // Gga.701.1.S1_at // GgaAffx.22999.1.S1_s_at // Gga.12800.1.S1_at // GgaAffx.9461.1.S1_at // Gga.1776.1.S1_at // GgaAffx.1557.1.S1_at // GgaAffx.11018.1.S1_s_at //…
GO:0044421	C	extracellular region part	49	486	1468	24599	0.00059	0.004	// Gga.542.1.S1_at // Gga.2965.1.S1_at // Gga.690.1.S1_at // Gga.2510.1.S1_at // Gga.11645.2.S1_a_at // Gga.4328.1.S1_at // GgaAffx.11429.1.S1_s_at // Gga.6713.1.S1_at // Gga.2679.1.S1_at // GgaAffx.1625.1.S1_s_at // Gga.9133.1.S1_at // GgaAffx.25192.2.S1_s_at // GgaAffx.25534.1.S1_s_at // GgaAffx.22999.1.S1_s_at // Gga.12800.1.S1_at // GgaAffx.9461.1.S1_at // Gga.6064.3.S1_a_at // Gga.1020.1.S1_…
GO:0005615	C	extracellular space	41	486	1197	24599	0.00093	0.0058	// Gga.542.1.S1_at // Gga.2965.1.S1_at // Gga.690.1.S1_at // Gga.2510.1.S1_at // Gga.11645.2.S1_a_at // Gga.4328.1.S1_at // Gga.9813.1.S1_at // Gga.6713.1.S1_at // GgaAffx.1625.1.S1_s_at // Gga.9133.1.S1_at // GgaAffx.25192.2.S1_s_at // GgaAffx.25534.1.S1_s_at // Gga.12800.1.S1_at // GgaAffx.9461.1.S1_at // Gga.6064.3.S1_a_at // Gga.1020.1.S1_at // Gga.11830.1.S1_at // GgaAffx.2960.1.S1_s_at // G…
GO:0005576	C	extracellular region	70	486	2359	24599	0.0013	0.0075	// Gga.542.1.S1_at // Gga.2965.1.S1_at // Gga.729.1.S1_at // Gga.2551.2.S1_s_at // Gga.690.1.S1_at // GgaAffx.8628.1.S1_at // Gga.2510.1.S1_at // Gga.11645.2.S1_a_at // GgaAffx.25229.1.S1_at // Gga.4328.1.S1_at // Gga.11830.1.S1_at // Gga.888.1.S1_at // Gga.9813.1.S1_at // GgaAffx.9165.1.A1_x_at // Gga.6713.1.S1_at // Gga.2679.1.S1_at // GgaAffx.1625.1.S1_s_at // Gga.7539.1.S1_at // GgaAffx.25192…
GO:0043235	C	receptor complex	14	486	294	24599	0.0027	0.014	// Gga.2965.1.S1_at // GgaAffx.25229.1.S1_at // GgaAffx.968.3.S1_s_at // Gga.7539.1.S1_at // Gga.998.2.S1_a_at // GgaAffx.25386.1.S1_at // GgaAffx.25534.1.S1_s_at // Gga.566.1.S1_at // GgaAffx.9461.1.S1_at // Gga.4458.1.S1_at // Gga.4507.1.S1_at // GgaAffx.25386.2.S1_s_at // Gga.19.1.S1_at // GgaAffx.9789.1.S1_at
GO:0044459	C	plasma membrane part	60	486	2254	24599	0.019	0.097	// GgaAffx.3477.1.S1_at // Gga.2965.1.S1_at // Gga.419.1.A1_at // GgaAffx.968.3.S1_s_at // Gga.13336.2.S1_x_at // GgaAffx.6712.2.S1_s_at // GgaAffx.7943.1.S1_s_at // Gga.13336.3.S1_x_at // Gga.3027.1.S1_at // GgaAffx.7251.1.S1_at // Gga.918.1.S1_at // GgaAffx.10876.2.S1_s_at // GgaAffx.12136.1.S1_s_at // Gga.4884.1.S1_at // Gga.1193.1.S1_at // Gga.4458.1.S1_at // Gga.6529.1.S1_at // Gga.5048.1.A1…
GO:0045121	C	membrane raft	5	486	93	24599	0.038	0.18	// GgaAffx.11885.1.S1_s_at // Gga.6529.1.S1_at // Gga.4458.1.S1_at // Gga.9541.1.S1_at // Gga.871.1.S1_at
GO:0005886	C	plasma membrane	78	486	3172	24599	0.043	0.19	// GgaAffx.3477.1.S1_at // Gga.2965.1.S1_at // Gga.419.1.A1_at // GgaAffx.968.3.S1_s_at // Gga.13336.2.S1_x_at // GgaAffx.6712.2.S1_s_at // Gga.450.1.S1_at // Gga.13336.3.S1_x_at // Gga.8164.1.S1_a_at // Gga.3027.1.S1_at // GgaAffx.7251.1.S1_at // Gga.918.1.S1_at // GgaAffx.10876.2.S1_s_at // GgaAffx.12136.1.S1_s_at // GgaAffx.11258.2.S1_s_at // Gga.1193.1.S1_at // Gga.4458.1.S1_at // Gga.12335.2…
GO:0008305	C	integrin complex	7	486	183	24599	0.074	0.31	// Gga.2965.1.S1_at // GgaAffx.25229.1.S1_at // Gga.7539.1.S1_at // GgaAffx.25534.1.S1_s_at // Gga.566.1.S1_at // GgaAffx.9461.1.S1_at // Gga.4507.1.S1_at
GO:0005773	C	vacuole	7	486	196	24599	0.097	0.38	// Gga.6072.2.S1_at // Gga.12233.1.S1_at // Gga.11865.1.S1_at // GgaAffx.26768.1.S1_s_at // Gga.11016.1.S1_at // GgaAffx.21790.1.S1_s_at // Gga.7159.1.S1_at
GO:0005764	C	lysosome	6	486	166	24599	0.11	0.42	// Gga.6072.2.S1_at // Gga.12233.1.S1_at // Gga.11865.1.S1_at // Gga.11016.1.S1_at // GgaAffx.21790.1.S1_s_at // Gga.7159.1.S1_at
GO:0000323	C	lytic vacuole	6	486	168	24599	0.12	0.42	// Gga.6072.2.S1_at // Gga.12233.1.S1_at // Gga.11865.1.S1_at // Gga.11016.1.S1_at // GgaAffx.21790.1.S1_s_at // Gga.7159.1.S1_at
GO:0005625	C	soluble fraction	8	486	249	24599	0.13	0.43	// Gga.3027.1.S1_at // Gga.4359.1.S1_s_at // Gga.11337.1.S1_at // Gga.6017.1.S1_s_at // Gga.4954.2.S1_a_at // GgaAffx.26700.1.S1_s_at // GgaAffx.21779.1.S1_s_at // GgaAffx.23872.1.S1_at
GO:0015629	C	actin cytoskeleton	10	486	364	24599	0.19	0.62	// Gga.16589.1.S1_at // GgaAffx.2373.1.S1_s_at // Gga.9179.1.S1_at // Gga.4988.2.S1_a_at // GgaAffx.10876.2.S1_s_at // GgaAffx.21250.1.S1_s_at // Gga.1009.2.S1_s_at // Gga.1294.1.S1_at // GgaAffx.21017.1.S1_s_at // Gga.1009.1.S1_s_at
GO:0005887	C	integral to plasma membrane	35	486	1540	24599	0.23	0.73	// GgaAffx.3477.1.S1_at // Gga.2965.1.S1_at // GgaAffx.12136.1.S1_s_at // GgaAffx.6712.2.S1_s_at // GgaAffx.21283.1.S1_at // Gga.566.1.S1_at // GgaAffx.7251.1.S1_at // Gga.918.1.S1_at // Gga.1193.1.S1_at // Gga.6529.1.S1_at // GgaAffx.9789.1.S1_at // Gga.7539.1.S1_at // GgaAffx.10393.1.S1_at // GgaAffx.7589.1.S1_at // GgaAffx.25534.1.S1_s_at // Gga.998.2.S1_a_at // GgaAffx.9461.1.S1_at // Gga.450…
GO:0031226	C	intrinsic to plasma membrane	35	486	1559	24599	0.25	0.76	// GgaAffx.3477.1.S1_at // Gga.2965.1.S1_at // GgaAffx.12136.1.S1_s_at // GgaAffx.6712.2.S1_s_at // GgaAffx.21283.1.S1_at // Gga.566.1.S1_at // GgaAffx.7251.1.S1_at // Gga.918.1.S1_at // Gga.1193.1.S1_at // Gga.6529.1.S1_at // GgaAffx.9789.1.S1_at // Gga.7539.1.S1_at // GgaAffx.10393.1.S1_at // GgaAffx.7589.1.S1_at // GgaAffx.25534.1.S1_s_at // Gga.998.2.S1_a_at // GgaAffx.9461.1.S1_at // Gga.450…
GO:0005768	C	endosome	5	486	209	24599	0.4	1	// Gga.4458.1.S1_at // Gga.11016.1.S1_at // Gga.9768.1.S1_at // Gga.4350.1.S1_at // GgaAffx.21790.1.S1_s_at
GO:0042995	C	cell projection	14	486	737	24599	0.6	1	// GgaAffx.25432.1.S1_s_at // Gga.2965.1.S1_at // Gga.13442.1.S1_at // Gga.11337.1.S1_at // GgaAffx.10876.2.S1_s_at // Gga.701.1.S1_at // Gga.4884.1.S1_at // Gga.1009.2.S1_s_at // GgaAffx.21779.1.S1_s_at // Gga.1009.1.S1_s_at // Gga.12335.2.S1_s_at // Gga.11948.2.S1_a_at // GgaAffx.5539.1.S1_s_at // GgaAffx.12014.1.S1_s_at
GO:0043005	C	neuron projection	6	486	320	24599	0.61	1	// Gga.2965.1.S1_at // Gga.11337.1.S1_at // Gga.701.1.S1_at // GgaAffx.21779.1.S1_s_at // Gga.11948.2.S1_a_at // GgaAffx.5539.1.S1_s_at
GO:0005856	C	cytoskeleton	27	486	1440	24599	0.63	1	// Gga.2435.1.S2_at // GgaAffx.12014.1.S1_s_at // Gga.217.1.S1_x_at // GgaAffx.10876.2.S1_s_at // Gga.1294.1.S1_at // GgaAffx.21017.1.S1_s_at // Gga.11456.1.S1_at // GgaAffx.9008.1.S1_s_at // Gga.16589.1.S1_at // Gga.13442.1.S1_at // Gga.9179.1.S1_at // GgaAffx.25386.2.S1_s_at // Gga.4988.2.S1_a_at // GgaAffx.2373.1.S1_s_at // Gga.4451.1.S1_at // GgaAffx.25386.1.S1_at // Gga.11337.1.S1_at // Gga.…
GO:0043234	C	protein complex	76	486	4085	24599	0.71	1	// GgaAffx.21436.1.S1_s_at // Gga.2965.1.S1_at // Gga.419.1.A1_at // GgaAffx.968.3.S1_s_at // Gga.13336.2.S1_x_at // Gga.998.2.S1_a_at // Gga.13336.3.S1_x_at // Gga.8164.1.S1_a_at // Gga.217.1.S1_x_at // Gga.11184.1.S1_at // Gga.1313.1.S1_s_at // Gga.4328.1.S1_at // Gga.918.1.S1_at // Gga.1009.2.S1_s_at // Gga.1294.1.S1_at // Gga.4954.2.S1_a_at // GgaAffx.21017.1.S1_s_at // Gga.4458.1.S1_at // Gg…
GO:0016020	C	membrane	131	486	7191	24599	0.81	1	// GgaAffx.3477.1.S1_at // Gga.998.2.S1_a_at // Gga.13336.3.S1_x_at // Gga.918.1.S1_at // Gga.15027.1.S1_at // GgaAffx.12599.1.S1_at // Gga.1193.1.S1_at // Gga.6529.1.S1_at // GgaAffx.9008.1.S1_s_at // GgaAffx.9789.1.S1_at // Gga.12120.1.S1_at // Gga.12516.1.S1_s_at // GgaAffx.1712.1.S1_at // GgaAffx.5454.1.S1_at // Gga.21.1.S1_a_at // Gga.5735.1.S1_at // GgaAffx.5458.1.S1_at // Gga.10553.1.S1_at…
GO:0030054	C	cell junction	7	486	473	24599	0.82	1	// GgaAffx.12014.1.S1_s_at // Gga.871.1.S1_at // GgaAffx.21250.1.S1_s_at // GgaAffx.21790.1.S1_s_at // Gga.1193.1.S1_at // GgaAffx.9008.1.S1_s_at // Gga.5528.1.S1_at
GO:0044430	C	cytoskeletal part	15	486	972	24599	0.86	1	// Gga.16589.1.S1_at // Gga.10463.1.S1_s_at // Gga.217.1.S1_x_at // Gga.4988.2.S1_a_at // GgaAffx.21017.1.S1_s_at // GgaAffx.10876.2.S1_s_at // Gga.11337.1.S1_at // Gga.1009.2.S1_s_at // Gga.9346.3.S1_a_at // GgaAffx.26700.1.S1_s_at // Gga.1009.1.S1_s_at // Gga.1294.1.S1_at // Gga.11948.2.S1_a_at // GgaAffx.5539.1.S1_s_at // Gga.4350.1.S1_at
GO:0031982	C	vesicle	7	486	518	24599	0.89	1	// Gga.566.1.S1_at // GgaAffx.25229.1.S1_at // Gga.871.1.S1_at // GgaAffx.21779.1.S1_s_at // Gga.1099.1.S1_at // Gga.11948.2.S1_a_at // GgaAffx.5539.1.S1_s_at
GO:0044425	C	membrane part	100	486	5731	24599	0.89	1	// GgaAffx.3477.1.S1_at // Gga.998.2.S1_a_at // Gga.13336.3.S1_x_at // Gga.918.1.S1_at // GgaAffx.12599.1.S1_at // Gga.1193.1.S1_at // Gga.6529.1.S1_at // GgaAffx.9008.1.S1_s_at // GgaAffx.9789.1.S1_at // Gga.12516.1.S1_s_at // GgaAffx.5454.1.S1_at // GgaAffx.5458.1.S1_at // GgaAffx.25386.1.S1_at // GgaAffx.8901.1.S1_at // Gga.6203.1.S1_at // Gga.4414.1.S1_s_at // Gga.9882.1.S1_at // GgaAffx.2461…
GO:0000267	C	cell fraction	14	486	967	24599	0.9	1	// Gga.3027.1.S1_at // Gga.6387.1.S1_at // Gga.4359.1.S1_s_at // Gga.4988.2.S1_a_at // Gga.11337.1.S1_at // Gga.566.1.S1_at // Gga.9541.1.S1_at // Gga.871.1.S1_at // Gga.6017.1.S1_s_at // Gga.4954.2.S1_a_at // GgaAffx.26700.1.S1_s_at // GgaAffx.21779.1.S1_s_at // GgaAffx.5539.1.S1_s_at // GgaAffx.23872.1.S1_at
GO:0005737	C	cytoplasm	122	486	6968	24599	0.9	1	// GgaAffx.11746.1.S1_s_at // GgaAffx.7443.1.S1_at // GgaAffx.5967.1.S1_at // Gga.6387.1.S1_at // GgaAffx.9008.1.S1_s_at // Gga.12120.1.S1_at // GgaAffx.12969.1.S1_at // Gga.9179.1.S1_at // GgaAffx.1712.1.S1_at // Gga.2909.1.S1_at // Gga.9563.1.S1_at // Gga.1099.1.S1_at // Gga.4594.1.S1_at // Gga.7298.1.S1_at // Gga.888.1.S1_at // GgaAffx.2373.1.S1_s_at // Gga.3624.1.S1_at // Gga.4988.2.S1_a_at /…
GO:0016023	C	cytoplasmic membrane-bounded vesicle	5	486	411	24599	0.91	1	// Gga.566.1.S1_at // Gga.871.1.S1_at // GgaAffx.5539.1.S1_s_at // GgaAffx.25229.1.S1_at // Gga.1099.1.S1_at
GO:0005794	C	Golgi apparatus	11	486	813	24599	0.92	1	// Gga.6072.2.S1_at // Gga.12120.1.S1_at // Gga.3624.1.S1_at // GgaAffx.6712.2.S1_s_at // Gga.8164.1.S1_a_at // Gga.3676.1.S1_at // Gga.1148.1.S1_at // GgaAffx.21779.1.S1_s_at // Gga.1148.1.S2_at // GgaAffx.12547.1.S1_at // GgaAffx.12557.1.S1_s_at
GO:0031410	C	cytoplasmic vesicle	6	486	493	24599	0.92	1	// Gga.566.1.S1_at // GgaAffx.25229.1.S1_at // Gga.871.1.S1_at // Gga.1099.1.S1_at // Gga.11948.2.S1_a_at // GgaAffx.5539.1.S1_s_at
GO:0031988	C	membrane-bounded vesicle	5	486	422	24599	0.92	1	// Gga.566.1.S1_at // Gga.871.1.S1_at // GgaAffx.5539.1.S1_s_at // GgaAffx.25229.1.S1_at // Gga.1099.1.S1_at
GO:0032991	C	macromolecular complex	76	486	4672	24599	0.95	1	// GgaAffx.21436.1.S1_s_at // Gga.2965.1.S1_at // Gga.419.1.A1_at // GgaAffx.968.3.S1_s_at // Gga.13336.2.S1_x_at // Gga.998.2.S1_a_at // Gga.13336.3.S1_x_at // Gga.8164.1.S1_a_at // Gga.217.1.S1_x_at // Gga.11184.1.S1_at // Gga.1313.1.S1_s_at // Gga.4328.1.S1_at // Gga.918.1.S1_at // Gga.1009.2.S1_s_at // Gga.1294.1.S1_at // Gga.4954.2.S1_a_at // GgaAffx.21017.1.S1_s_at // Gga.4458.1.S1_at // Gg…
GO:0005829	C	cytosol	7	486	633	24599	0.97	1	// GgaAffx.968.3.S1_s_at // GgaAffx.6712.2.S1_s_at // GgaAffx.7943.1.S1_s_at // GgaAffx.10876.2.S1_s_at // Gga.2909.1.S1_at // Gga.4981.1.S1_s_at // Gga.11948.2.S1_a_at
GO:0031967	C	organelle envelope	6	486	580	24599	0.97	1	// Gga.11337.1.S1_at // Gga.6387.1.S1_at // GgaAffx.26768.1.S1_s_at // Gga.10923.2.S1_s_at // Gga.6093.1.S1_at // Gga.4350.1.S1_at
GO:0031975	C	envelope	6	486	582	24599	0.97	1	// Gga.11337.1.S1_at // Gga.6387.1.S1_at // GgaAffx.26768.1.S1_s_at // Gga.10923.2.S1_s_at // Gga.6093.1.S1_at // Gga.4350.1.S1_at
GO:0015630	C	microtubule cytoskeleton	5	486	553	24599	0.98	1	// GgaAffx.26700.1.S1_s_at // Gga.11337.1.S1_at // Gga.11948.2.S1_a_at // Gga.217.1.S1_x_at // Gga.10463.1.S1_s_at
GO:0016021	C	integral to membrane	76	486	4921	24599	0.98	1	// GgaAffx.3477.1.S1_at // Gga.2965.1.S1_at // Gga.419.1.A1_at // GgaAffx.12136.1.S1_s_at // GgaAffx.6712.2.S1_s_at // Gga.13336.3.S1_x_at // Gga.3027.1.S1_at // GgaAffx.11756.1.S1_at // Gga.918.1.S1_at // GgaAffx.7251.1.S1_at // Gga.10351.2.S1_x_at // GgaAffx.12599.1.S1_at // Gga.4458.1.S1_at // Gga.1193.1.S1_at // Gga.4675.1.S2_at // Gga.6529.1.S1_at // Gga.5048.1.A1_at // GgaAffx.9789.1.S1_at …
GO:0031224	C	intrinsic to membrane	78	486	4996	24599	0.98	1	// GgaAffx.3477.1.S1_at // Gga.2965.1.S1_at // Gga.419.1.A1_at // GgaAffx.12136.1.S1_s_at // GgaAffx.6712.2.S1_s_at // Gga.13336.3.S1_x_at // Gga.3027.1.S1_at // GgaAffx.11756.1.S1_at // Gga.918.1.S1_at // GgaAffx.7251.1.S1_at // Gga.10351.2.S1_x_at // GgaAffx.12599.1.S1_at // Gga.4458.1.S1_at // Gga.1193.1.S1_at // Gga.4675.1.S2_at // Gga.6529.1.S1_at // Gga.5048.1.A1_at // GgaAffx.10617.2.S1_s_…
GO:0005624	C	membrane fraction	8	486	777	24599	0.99	1	// Gga.566.1.S1_at // Gga.6387.1.S1_at // Gga.4988.2.S1_a_at // Gga.9541.1.S1_at // Gga.871.1.S1_at // GgaAffx.21779.1.S1_s_at // GgaAffx.26700.1.S1_s_at // GgaAffx.5539.1.S1_s_at
GO:0005626	C	insoluble fraction	8	486	793	24599	0.99	1	// Gga.566.1.S1_at // Gga.6387.1.S1_at // Gga.4988.2.S1_a_at // Gga.9541.1.S1_at // Gga.871.1.S1_at // GgaAffx.21779.1.S1_s_at // GgaAffx.26700.1.S1_s_at // GgaAffx.5539.1.S1_s_at
GO:0005667	C	transcription factor complex	12	486	1116	24599	0.99	1	// GgaAffx.21436.1.S1_s_at // GgaAffx.20792.1.S1_s_at // Gga.8164.1.S1_a_at // Gga.1313.1.S1_s_at // Gga.276.1.S1_at // Gga.4954.2.S1_a_at // Gga.7100.1.S1_at // Gga.19934.1.S1_at // Gga.2603.1.S1_at // Gga.578.1.S1_at // GgaAffx.4780.1.S1_at // Gga.5528.1.S1_at
GO:0005783	C	endoplasmic reticulum	8	486	828	24599	0.99	1	// Gga.540.1.S1_at // Gga.1220.1.A1_at // GgaAffx.25229.1.S1_at // GgaAffx.7420.1.S1_at // Gga.11337.1.S1_at // GgaAffx.10393.1.S1_at // GgaAffx.21790.1.S1_s_at // Gga.9880.1.S1_at
GO:0043228	C	non-membrane-bounded organelle	31	486	2329	24599	0.99	1	// Gga.2435.1.S2_at // GgaAffx.12014.1.S1_s_at // Gga.217.1.S1_x_at // GgaAffx.10876.2.S1_s_at // Gga.1294.1.S1_at // GgaAffx.21017.1.S1_s_at // Gga.11456.1.S1_at // GgaAffx.9008.1.S1_s_at // Gga.16589.1.S1_at // Gga.13442.1.S1_at // Gga.9179.1.S1_at // GgaAffx.25386.2.S1_s_at // GgaAffx.11648.1.S1_at // Gga.4988.2.S1_a_at // GgaAffx.2373.1.S1_s_at // Gga.4451.1.S1_at // GgaAffx.25386.1.S1_at // …
GO:0043232	C	intracellular non-membrane-bounded organelle	31	486	2329	24599	0.99	1	// Gga.2435.1.S2_at // GgaAffx.12014.1.S1_s_at // Gga.217.1.S1_x_at // GgaAffx.10876.2.S1_s_at // Gga.1294.1.S1_at // GgaAffx.21017.1.S1_s_at // Gga.11456.1.S1_at // GgaAffx.9008.1.S1_s_at // Gga.16589.1.S1_at // Gga.13442.1.S1_at // Gga.9179.1.S1_at // GgaAffx.25386.2.S1_s_at // GgaAffx.11648.1.S1_at // Gga.4988.2.S1_a_at // GgaAffx.2373.1.S1_s_at // Gga.4451.1.S1_at // GgaAffx.25386.1.S1_at // …
GO:0005622	C	intracellular	154	486	10928	24599	1	1	// GgaAffx.21436.1.S1_s_at // GgaAffx.11746.1.S1_s_at // Gga.11830.1.S1_at // GgaAffx.7443.1.S1_at // GgaAffx.5967.1.S1_at // Gga.4954.2.S1_a_at // Gga.6387.1.S1_at // GgaAffx.9008.1.S1_s_at // Gga.12120.1.S1_at // GgaAffx.12969.1.S1_at // Gga.9179.1.S1_at // GgaAffx.1712.1.S1_at // Gga.2909.1.S1_at // Gga.9563.1.S1_at // Gga.1099.1.S1_at // Gga.2603.1.S1_at // GgaAffx.11648.1.S1_at // Gga.4594.1…
GO:0005623	C	cell	238	486	15095	24599	1	1	// GgaAffx.3477.1.S1_at // GgaAffx.21436.1.S1_s_at // Gga.998.2.S1_a_at // GgaAffx.11746.1.S1_s_at // Gga.723.1.S1_a_at // GgaAffx.7443.1.S1_at // GgaAffx.5967.1.S1_at // Gga.918.1.S1_at // GgaAffx.7251.1.S1_at // Gga.4954.2.S1_a_at // GgaAffx.12599.1.S1_at // Gga.1193.1.S1_at // Gga.6387.1.S1_at // Gga.6529.1.S1_at // GgaAffx.9008.1.S1_s_at // GgaAffx.9789.1.S1_at // Gga.12120.1.S1_at // Gga.125…
GO:0005634	C	nucleus	36	486	4376	24599	1	1	// GgaAffx.21436.1.S1_s_at // Gga.2965.1.S1_at // Gga.6387.1.S1_at // Gga.415.1.S1_at // GgaAffx.11885.1.S1_s_at // Gga.11830.1.S1_at // Gga.8164.1.S1_a_at // Gga.1313.1.S1_s_at // Gga.4954.2.S1_a_at // Gga.11456.1.S1_at // Gga.276.1.S1_at // GgaAffx.4780.1.S1_at // Gga.6375.1.S1_at // Gga.11337.1.S1_at // GgaAffx.1712.1.S1_at // Gga.19934.1.S1_at // Gga.2603.1.S1_at // GgaAffx.11648.1.S1_at // G…
GO:0005654	C	nucleoplasm	13	486	1406	24599	1	1	// GgaAffx.21436.1.S1_s_at // GgaAffx.20792.1.S1_s_at // Gga.8164.1.S1_a_at // Gga.1313.1.S1_s_at // Gga.276.1.S1_at // Gga.4954.2.S1_a_at // Gga.7100.1.S1_at // Gga.19934.1.S1_at // Gga.2603.1.S1_at // GgaAffx.11648.1.S1_at // Gga.578.1.S1_at // GgaAffx.4780.1.S1_at // Gga.5528.1.S1_at
GO:0012505	C	endomembrane system	5	486	982	24599	1	1	// GgaAffx.26768.1.S1_s_at // Gga.11337.1.S1_at // Gga.10923.2.S1_s_at // Gga.6387.1.S1_at // Gga.3676.1.S1_at
GO:0031090	C	organelle membrane	6	486	1240	24599	1	1	// Gga.11337.1.S1_at // Gga.3676.1.S1_at // Gga.11016.1.S1_at // Gga.10923.2.S1_s_at // Gga.7159.1.S1_at // Gga.6093.1.S1_at
GO:0031974	C	membrane-enclosed lumen	16	486	1843	24599	1	1	// GgaAffx.21436.1.S1_s_at // Gga.11337.1.S1_at // GgaAffx.20792.1.S1_s_at // Gga.8164.1.S1_a_at // Gga.701.1.S1_at // Gga.1313.1.S1_s_at // Gga.276.1.S1_at // Gga.9346.3.S1_a_at // Gga.4954.2.S1_a_at // Gga.7100.1.S1_at // Gga.19934.1.S1_at // Gga.2603.1.S1_at // GgaAffx.11648.1.S1_at // Gga.578.1.S1_at // GgaAffx.4780.1.S1_at // Gga.5528.1.S1_at
GO:0031981	C	nuclear lumen	15	486	1580	24599	1	1	// GgaAffx.21436.1.S1_s_at // GgaAffx.20792.1.S1_s_at // Gga.8164.1.S1_a_at // Gga.701.1.S1_at // Gga.1313.1.S1_s_at // Gga.276.1.S1_at // Gga.9346.3.S1_a_at // Gga.4954.2.S1_a_at // Gga.7100.1.S1_at // Gga.19934.1.S1_at // Gga.2603.1.S1_at // GgaAffx.11648.1.S1_at // Gga.578.1.S1_at // GgaAffx.4780.1.S1_at // Gga.5528.1.S1_at
GO:0043226	C	organelle	85	486	8128	24599	1	1	// GgaAffx.21436.1.S1_s_at // Gga.2435.1.S2_at // Gga.2965.1.S1_at // Gga.9880.1.S1_at // Gga.578.1.S2_at // Gga.415.1.S1_at // GgaAffx.26768.1.S1_s_at // GgaAffx.6712.2.S1_s_at // GgaAffx.11885.1.S1_s_at // Gga.11830.1.S1_at // Gga.8164.1.S1_a_at // Gga.217.1.S1_x_at // Gga.12233.1.S1_at // Gga.1313.1.S1_s_at // GgaAffx.10876.2.S1_s_at // Gga.1294.1.S1_at // Gga.4954.2.S1_a_at // GgaAffx.21017.1…
GO:0043227	C	membrane-bounded organelle	66	486	6915	24599	1	1	// GgaAffx.21436.1.S1_s_at // Gga.2965.1.S1_at // Gga.6387.1.S1_at // Gga.415.1.S1_at // GgaAffx.26768.1.S1_s_at // GgaAffx.6712.2.S1_s_at // GgaAffx.11885.1.S1_s_at // Gga.11830.1.S1_at // Gga.8164.1.S1_a_at // Gga.12233.1.S1_at // Gga.1313.1.S1_s_at // Gga.1220.1.A1_at // Gga.4954.2.S1_a_at // Gga.4458.1.S1_at // Gga.11456.1.S1_at // Gga.276.1.S1_at // GgaAffx.4780.1.S1_at // Gga.6375.1.S1_at /…
GO:0043229	C	intracellular organelle	85	486	8118	24599	1	1	// GgaAffx.21436.1.S1_s_at // Gga.2435.1.S2_at // Gga.2965.1.S1_at // Gga.9880.1.S1_at // Gga.578.1.S2_at // Gga.415.1.S1_at // GgaAffx.26768.1.S1_s_at // GgaAffx.6712.2.S1_s_at // GgaAffx.11885.1.S1_s_at // Gga.11830.1.S1_at // Gga.8164.1.S1_a_at // Gga.217.1.S1_x_at // Gga.12233.1.S1_at // Gga.1313.1.S1_s_at // GgaAffx.10876.2.S1_s_at // Gga.1294.1.S1_at // Gga.4954.2.S1_a_at // GgaAffx.21017.1…
GO:0043231	C	intracellular membrane-bounded organelle	65	486	6905	24599	1	1	// GgaAffx.21436.1.S1_s_at // Gga.2965.1.S1_at // Gga.6387.1.S1_at // Gga.415.1.S1_at // GgaAffx.26768.1.S1_s_at // GgaAffx.6712.2.S1_s_at // GgaAffx.11885.1.S1_s_at // Gga.11830.1.S1_at // Gga.8164.1.S1_a_at // Gga.12233.1.S1_at // Gga.1313.1.S1_s_at // Gga.1220.1.A1_at // Gga.4954.2.S1_a_at // Gga.4458.1.S1_at // Gga.11456.1.S1_at // Gga.276.1.S1_at // GgaAffx.4780.1.S1_at // Gga.6375.1.S1_at /…
GO:0043233	C	organelle lumen	16	486	1821	24599	1	1	// GgaAffx.21436.1.S1_s_at // Gga.11337.1.S1_at // GgaAffx.20792.1.S1_s_at // Gga.8164.1.S1_a_at // Gga.701.1.S1_at // Gga.1313.1.S1_s_at // Gga.276.1.S1_at // Gga.9346.3.S1_a_at // Gga.4954.2.S1_a_at // Gga.7100.1.S1_at // Gga.19934.1.S1_at // Gga.2603.1.S1_at // GgaAffx.11648.1.S1_at // Gga.578.1.S1_at // GgaAffx.4780.1.S1_at // Gga.5528.1.S1_at
GO:0044422	C	organelle part	39	486	4488	24599	1	1	// GgaAffx.21436.1.S1_s_at // Gga.6387.1.S1_at // Gga.8164.1.S1_a_at // Gga.217.1.S1_x_at // Gga.1313.1.S1_s_at // GgaAffx.10876.2.S1_s_at // Gga.1294.1.S1_at // Gga.4954.2.S1_a_at // GgaAffx.21017.1.S1_s_at // GgaAffx.4780.1.S1_at // Gga.12120.1.S1_at // Gga.16589.1.S1_at // Gga.13442.1.S1_at // Gga.19934.1.S1_at // Gga.2603.1.S1_at // GgaAffx.11648.1.S1_at // Gga.5528.1.S1_at // GgaAffx.20792.1…
GO:0044424	C	intracellular part	152	486	10424	24599	1	1	// GgaAffx.21436.1.S1_s_at // GgaAffx.11746.1.S1_s_at // Gga.11830.1.S1_at // GgaAffx.7443.1.S1_at // GgaAffx.5967.1.S1_at // Gga.4954.2.S1_a_at // Gga.6387.1.S1_at // GgaAffx.9008.1.S1_s_at // Gga.12120.1.S1_at // GgaAffx.12969.1.S1_at // Gga.9179.1.S1_at // GgaAffx.1712.1.S1_at // Gga.2909.1.S1_at // Gga.9563.1.S1_at // Gga.1099.1.S1_at // Gga.2603.1.S1_at // GgaAffx.11648.1.S1_at // Gga.4594.1…
GO:0044428	C	nuclear part	19	486	2004	24599	1	1	// GgaAffx.21436.1.S1_s_at // Gga.11337.1.S1_at // GgaAffx.26768.1.S1_s_at // Gga.6387.1.S1_at // GgaAffx.20792.1.S1_s_at // Gga.8164.1.S1_a_at // Gga.701.1.S1_at // Gga.1313.1.S1_s_at // Gga.276.1.S1_at // Gga.10923.2.S1_s_at // Gga.9346.3.S1_a_at // Gga.4954.2.S1_a_at // Gga.7100.1.S1_at // Gga.19934.1.S1_at // Gga.2603.1.S1_at // GgaAffx.11648.1.S1_at // Gga.578.1.S1_at // GgaAffx.4780.1.S1_at…
GO:0044444	C	cytoplasmic part	42	486	4032	24599	1	1	// GgaAffx.968.3.S1_s_at // GgaAffx.6712.2.S1_s_at // Gga.8164.1.S1_a_at // Gga.12233.1.S1_at // GgaAffx.11711.1.S1_s_at // GgaAffx.10876.2.S1_s_at // Gga.4458.1.S1_at // Gga.566.1.S1_at // Gga.12120.1.S1_at // Gga.11337.1.S1_at // GgaAffx.25229.1.S1_at // GgaAffx.7420.1.S1_at // Gga.2909.1.S1_at // GgaAffx.21790.1.S1_s_at // Gga.1099.1.S1_at // GgaAffx.12557.1.S1_s_at // Gga.9880.1.S1_at // Gga.…
GO:0044446	C	intracellular organelle part	38	486	4466	24599	1	1	// GgaAffx.21436.1.S1_s_at // Gga.6387.1.S1_at // Gga.8164.1.S1_a_at // Gga.217.1.S1_x_at // Gga.1313.1.S1_s_at // GgaAffx.10876.2.S1_s_at // Gga.1294.1.S1_at // Gga.4954.2.S1_a_at // GgaAffx.21017.1.S1_s_at // GgaAffx.4780.1.S1_at // Gga.12120.1.S1_at // Gga.16589.1.S1_at // Gga.19934.1.S1_at // Gga.2603.1.S1_at // GgaAffx.11648.1.S1_at // Gga.5528.1.S1_at // GgaAffx.20792.1.S1_s_at // Gga.4988.…
GO:0044451	C	nucleoplasm part	13	486	1362	24599	1	1	// GgaAffx.21436.1.S1_s_at // GgaAffx.20792.1.S1_s_at // Gga.8164.1.S1_a_at // Gga.1313.1.S1_s_at // Gga.276.1.S1_at // Gga.4954.2.S1_a_at // Gga.7100.1.S1_at // Gga.19934.1.S1_at // Gga.2603.1.S1_at // GgaAffx.11648.1.S1_at // Gga.578.1.S1_at // GgaAffx.4780.1.S1_at // Gga.5528.1.S1_at
GO:0044464	C	cell part	238	486	15095	24599	1	1	// GgaAffx.3477.1.S1_at // GgaAffx.21436.1.S1_s_at // Gga.998.2.S1_a_at // GgaAffx.11746.1.S1_s_at // Gga.723.1.S1_a_at // GgaAffx.7443.1.S1_at // GgaAffx.5967.1.S1_at // Gga.918.1.S1_at // GgaAffx.7251.1.S1_at // Gga.4954.2.S1_a_at // GgaAffx.12599.1.S1_at // Gga.1193.1.S1_at // Gga.6387.1.S1_at // Gga.6529.1.S1_at // GgaAffx.9008.1.S1_s_at // GgaAffx.9789.1.S1_at // Gga.12120.1.S1_at // Gga.125…
GO:0070013	C	intracellular organelle lumen	16	486	1820	24599	1	1	// GgaAffx.21436.1.S1_s_at // Gga.11337.1.S1_at // GgaAffx.20792.1.S1_s_at // Gga.8164.1.S1_a_at // Gga.701.1.S1_at // Gga.1313.1.S1_s_at // Gga.276.1.S1_at // Gga.9346.3.S1_a_at // Gga.4954.2.S1_a_at // Gga.7100.1.S1_at // Gga.19934.1.S1_at // Gga.2603.1.S1_at // GgaAffx.11648.1.S1_at // Gga.578.1.S1_at // GgaAffx.4780.1.S1_at // Gga.5528.1.S1_at

## Sheet: Down-regulated >2-fold changes
GO_acc	term_type	Term	queryitem	querytotal	bgitem	bgtotal	pvalue	FDR	Probe entries
GO:0034641	P	cellular nitrogen compound metabolic process	45	456	423	24599	6e-20	3e-17	// Gga.4909.2.S1_s_at // GgaAffx.23641.3.S1_s_at // GgaAffx.4590.1.S1_at // GgaAffx.24899.1.S1_at // GgaAffx.20192.1.S1_s_at // Gga.14395.1.S1_s_at // GgaAffx.21140.1.S1_s_at // GgaAffx.9792.1.S1_at // Gga.16450.1.S1_at // GgaAffx.1528.1.S1_at // Gga.19278.1.S1_s_at // GgaAffx.6314.1.S1_s_at // GgaAffx.21433.1.S1_s_at // GgaAffx.681.3.S1_s_at // Gga.6085.3.S1_a_at // Gga.4119.1.S1_at // GgaAffx.2…
GO:0010876	P	lipid localization	7	456	7	24599	8e-13	2e-10	// GgaAffx.10968.1.S1_at // GgaAffx.1092.1.S1_s_at // Gga.4425.1.S1_at // Gga.4006.2.S1_a_at // Gga.18491.1.S1_s_at // GgaAffx.25789.4.S1_s_at // GgaAffx.10968.2.S1_s_at
GO:0006629	P	lipid metabolic process	51	456	953	24599	1.6e-10	2.6e-08	// GgaAffx.25618.1.S1_at // GgaAffx.4278.2.S1_s_at // Gga.19278.1.S1_s_at // Gga.8312.3.S1_at // Gga.18491.1.S1_s_at // Gga.7556.1.S1_at // GgaAffx.25789.4.S1_s_at // Gga.4119.1.S1_at // GgaAffx.193.1.S1_at // Gga.4989.1.S1_s_at // GgaAffx.23840.1.S1_s_at // GgaAffx.7493.1.S1_s_at // GgaAffx.681.3.S1_s_at // Gga.345.1.S1_at // Gga.7797.1.S1_s_at // GgaAffx.7526.1.S1_at // Gga.8411.3.S1_s_at // Gg…
GO:0032787	P	monocarboxylic acid metabolic process	30	456	403	24599	4.2e-10	5.3e-08	// Gga.4909.2.S1_s_at // GgaAffx.25618.1.S1_at // Gga.1132.1.S1_at // GgaAffx.20192.1.S1_s_at // GgaAffx.4278.2.S1_s_at // Gga.19278.1.S1_s_at // Gga.8312.3.S1_at // Gga.18491.1.S1_s_at // GgaAffx.25789.4.S1_s_at // Gga.4119.1.S1_at // GgaAffx.23840.1.S1_s_at // GgaAffx.4468.1.S1_at // Gga.4989.1.S1_s_at // GgaAffx.22014.2.S1_s_at // Gga.4006.2.S1_a_at // Gga.5397.1.S1_at // Gga.8312.4.S1_a_at //…
GO:0006790	P	sulfur metabolic process	21	456	207	24599	6.5e-10	6.5e-08	// Gga.133.1.S1_at // Gga.7186.2.S1_a_at // GgaAffx.9792.1.S1_at // GgaAffx.10169.1.S1_at // Gga.7320.1.S1_s_at // GgaAffx.26777.1.S1_s_at // GgaAffx.24934.1.S1_s_at // GgaAffx.25940.1.S1_at // Gga.6936.1.A1_at // Gga.16586.1.S1_at // Gga.12996.1.S1_at // GgaAffx.10350.1.S1_at // Gga.8293.1.S1_at // Gga.4425.1.S1_at // Gga.4223.1.S1_at // GgaAffx.5541.1.S1_at // GgaAffx.24553.1.S1_at // GgaAffx.9…
GO:0006631	P	fatty acid metabolic process	20	456	203	24599	2.7e-09	2.2e-07	// Gga.4989.1.S1_s_at // GgaAffx.25875.1.S1_s_at // GgaAffx.4468.1.S1_at // GgaAffx.25618.1.S1_at // GgaAffx.23089.1.S1_at // GgaAffx.20100.1.S1_at // GgaAffx.13140.1.S1_at // GgaAffx.23089.1.S1_s_at // Gga.16586.1.S1_at // GgaAffx.26414.1.S1_s_at // GgaAffx.22014.2.S1_s_at // GgaAffx.4278.2.S1_s_at // Gga.19278.1.S1_s_at // Gga.4006.2.S1_a_at // Gga.8312.3.S1_at // Gga.5397.1.S1_at // GgaAffx.14…
GO:0006575	P	cellular amino acid derivative metabolic process	23	456	294	24599	1.6e-08	1.1e-06	// GgaAffx.24899.1.S1_at // GgaAffx.26777.1.S1_s_at // GgaAffx.20192.1.S1_s_at // Gga.6936.1.A1_at // GgaAffx.1241.1.S1_at // Gga.4223.1.S1_at // Gga.19278.1.S1_s_at // Gga.7797.1.S1_s_at // Gga.4119.1.S1_at // Gga.7320.1.S1_s_at // Gga.5922.2.S1_a_at // GgaAffx.22014.2.S1_s_at // GgaAffx.9792.1.S1_at // GgaAffx.20100.1.S1_at // Gga.16586.1.S1_at // GgaAffx.5541.1.S1_at // GgaAffx.24899.1.S1_s_at…
GO:0006732	P	coenzyme metabolic process	23	456	307	24599	3.5e-08	2.2e-06	// Gga.4909.2.S1_s_at // Gga.1132.1.S1_at // Gga.14395.1.S1_s_at // Gga.6936.1.A1_at // GgaAffx.1241.1.S1_at // Gga.4223.1.S1_at // Gga.5623.2.S1_s_at // Gga.7797.1.S1_s_at // GgaAffx.6314.1.S1_s_at // GgaAffx.26446.2.S1_s_at // GgaAffx.4468.1.S1_at // Gga.7320.1.S1_s_at // Gga.6085.3.S1_a_at // GgaAffx.26777.1.S1_s_at // GgaAffx.22014.2.S1_s_at // GgaAffx.2648.1.S1_s_at // GgaAffx.907.1.S1_at //…
GO:0008202	P	steroid metabolic process	18	456	204	24599	8.7e-08	4.5e-06	// GgaAffx.7407.1.S1_s_at // GgaAffx.7493.1.S1_s_at // Gga.7556.1.S1_at // GgaAffx.4468.1.S1_at // Gga.133.1.S1_at // Gga.345.1.S1_at // GgaAffx.25789.4.S1_s_at // Gga.16586.1.S1_at // Gga.8293.1.S1_at // Gga.18930.2.S1_a_at // GgaAffx.2077.1.S1_s_at // Gga.19278.1.S1_s_at // GgaAffx.1474.1.S1_at // Gga.18491.1.S1_s_at // Gga.7254.2.S1_a_at // GgaAffx.25875.1.S1_s_at // Gga.4119.1.S1_at // GgaAff…
GO:0043436	P	oxoacid metabolic process	57	456	1373	24599	1.1e-07	4.5e-06	// Gga.4909.2.S1_s_at // GgaAffx.23641.3.S1_s_at // GgaAffx.4590.1.S1_at // GgaAffx.25618.1.S1_at // Gga.1132.1.S1_at // GgaAffx.20192.1.S1_s_at // GgaAffx.23089.1.S1_s_at // GgaAffx.21140.1.S1_s_at // GgaAffx.4278.2.S1_s_at // Gga.16450.1.S1_at // GgaAffx.1528.1.S1_at // Gga.19278.1.S1_s_at // Gga.8312.3.S1_at // Gga.18491.1.S1_s_at // GgaAffx.25875.1.S1_s_at // GgaAffx.25789.4.S1_s_at // GgaAff…
GO:0006082	P	organic acid metabolic process	57	456	1374	24599	1.1e-07	4.5e-06	// Gga.4909.2.S1_s_at // GgaAffx.23641.3.S1_s_at // GgaAffx.4590.1.S1_at // GgaAffx.25618.1.S1_at // Gga.1132.1.S1_at // GgaAffx.20192.1.S1_s_at // GgaAffx.23089.1.S1_s_at // GgaAffx.21140.1.S1_s_at // GgaAffx.4278.2.S1_s_at // Gga.16450.1.S1_at // GgaAffx.1528.1.S1_at // Gga.19278.1.S1_s_at // Gga.8312.3.S1_at // Gga.18491.1.S1_s_at // GgaAffx.25875.1.S1_s_at // GgaAffx.25789.4.S1_s_at // GgaAff…
GO:0019752	P	carboxylic acid metabolic process	57	456	1373	24599	1.1e-07	4.5e-06	// Gga.4909.2.S1_s_at // GgaAffx.23641.3.S1_s_at // GgaAffx.4590.1.S1_at // GgaAffx.25618.1.S1_at // Gga.1132.1.S1_at // GgaAffx.20192.1.S1_s_at // GgaAffx.23089.1.S1_s_at // GgaAffx.21140.1.S1_s_at // GgaAffx.4278.2.S1_s_at // Gga.16450.1.S1_at // GgaAffx.1528.1.S1_at // Gga.19278.1.S1_s_at // Gga.8312.3.S1_at // Gga.18491.1.S1_s_at // GgaAffx.25875.1.S1_s_at // GgaAffx.25789.4.S1_s_at // GgaAff…
GO:0008610	P	lipid biosynthetic process	24	456	357	24599	1.4e-07	5.2e-06	// GgaAffx.25618.1.S1_at // Gga.19278.1.S1_s_at // Gga.8312.3.S1_at // Gga.4119.1.S1_at // GgaAffx.22014.2.S1_s_at // Gga.4989.1.S1_s_at // Gga.8312.4.S1_a_at // GgaAffx.2648.1.S1_s_at // GgaAffx.7407.1.S1_s_at // GgaAffx.193.1.S1_at // GgaAffx.23089.1.S1_at // GgaAffx.26414.1.S1_s_at // Gga.16586.1.S1_at // GgaAffx.2077.1.S1_s_at // GgaAffx.1474.1.S1_at // Gga.7254.2.S1_a_at // Gga.10747.1.S1_s_…
GO:0051186	P	cofactor metabolic process	24	456	370	24599	2.6e-07	8.6e-06	// Gga.4909.2.S1_s_at // Gga.1132.1.S1_at // Gga.14395.1.S1_s_at // Gga.6936.1.A1_at // GgaAffx.1241.1.S1_at // Gga.4223.1.S1_at // Gga.5623.2.S1_s_at // Gga.7797.1.S1_s_at // GgaAffx.6314.1.S1_s_at // GgaAffx.26446.2.S1_s_at // GgaAffx.4468.1.S1_at // Gga.7320.1.S1_s_at // Gga.6085.3.S1_a_at // GgaAffx.26777.1.S1_s_at // GgaAffx.22014.2.S1_s_at // GgaAffx.2648.1.S1_s_at // GgaAffx.907.1.S1_at //…
GO:0042180	P	cellular ketone metabolic process	57	456	1413	24599	2.6e-07	8.6e-06	// Gga.4909.2.S1_s_at // GgaAffx.23641.3.S1_s_at // GgaAffx.4590.1.S1_at // GgaAffx.25618.1.S1_at // Gga.1132.1.S1_at // GgaAffx.20192.1.S1_s_at // GgaAffx.23089.1.S1_s_at // GgaAffx.21140.1.S1_s_at // GgaAffx.4278.2.S1_s_at // Gga.16450.1.S1_at // GgaAffx.1528.1.S1_at // Gga.19278.1.S1_s_at // Gga.8312.3.S1_at // Gga.18491.1.S1_s_at // GgaAffx.25875.1.S1_s_at // GgaAffx.25789.4.S1_s_at // GgaAff…
GO:0046394	P	carboxylic acid biosynthetic process	19	456	247	24599	3.3e-07	9.7e-06	// Gga.4989.1.S1_s_at // GgaAffx.25875.1.S1_s_at // GgaAffx.9792.1.S1_at // GgaAffx.2648.1.S1_s_at // GgaAffx.25618.1.S1_at // GgaAffx.23089.1.S1_at // GgaAffx.26414.1.S1_s_at // GgaAffx.12279.1.S1_s_at // GgaAffx.23089.1.S1_s_at // Gga.16586.1.S1_at // GgaAffx.10350.1.S1_at // Gga.4425.1.S1_at // GgaAffx.22014.2.S1_s_at // GgaAffx.2077.1.S1_s_at // Gga.19278.1.S1_s_at // Gga.8312.3.S1_at // Gga.…
GO:0016053	P	organic acid biosynthetic process	19	456	247	24599	3.3e-07	9.7e-06	// Gga.4989.1.S1_s_at // GgaAffx.25875.1.S1_s_at // GgaAffx.9792.1.S1_at // GgaAffx.2648.1.S1_s_at // GgaAffx.25618.1.S1_at // GgaAffx.23089.1.S1_at // GgaAffx.26414.1.S1_s_at // GgaAffx.12279.1.S1_s_at // GgaAffx.23089.1.S1_s_at // Gga.16586.1.S1_at // GgaAffx.10350.1.S1_at // Gga.4425.1.S1_at // GgaAffx.22014.2.S1_s_at // GgaAffx.2077.1.S1_s_at // Gga.19278.1.S1_s_at // Gga.8312.3.S1_at // Gga.…
GO:0008206	P	bile acid metabolic process	8	456	37	24599	3.6e-07	9.9e-06	// GgaAffx.4468.1.S1_at // Gga.16586.1.S1_at // GgaAffx.2077.1.S1_s_at // Gga.19278.1.S1_s_at // Gga.18491.1.S1_s_at // GgaAffx.25875.1.S1_s_at // GgaAffx.25789.4.S1_s_at // Gga.4119.1.S1_at
GO:0008300	P	isoprenoid catabolic process	5	456	10	24599	5.3e-07	1.4e-05	// GgaAffx.25875.1.S1_s_at // GgaAffx.22014.2.S1_s_at // GgaAffx.2077.1.S1_s_at // Gga.19278.1.S1_s_at // Gga.4119.1.S1_at
GO:0044255	P	cellular lipid metabolic process	39	456	847	24599	7.1e-07	1.8e-05	// GgaAffx.25618.1.S1_at // GgaAffx.4278.2.S1_s_at // Gga.19278.1.S1_s_at // Gga.8312.3.S1_at // Gga.7556.1.S1_at // Gga.7797.1.S1_s_at // Gga.4119.1.S1_at // Gga.4989.1.S1_s_at // GgaAffx.23840.1.S1_s_at // GgaAffx.4468.1.S1_at // GgaAffx.7526.1.S1_at // Gga.8411.3.S1_s_at // GgaAffx.711.1.A1_at // Gga.5922.2.S1_a_at // GgaAffx.22014.2.S1_s_at // Gga.4006.2.S1_a_at // Gga.5397.1.S1_at // Gga.831…
GO:0006519	P	cellular amino acid and derivative metabolic process	48	456	1203	24599	2.5e-06	5.9e-05	// Gga.4909.2.S1_s_at // GgaAffx.23641.3.S1_s_at // GgaAffx.4590.1.S1_at // GgaAffx.24899.1.S1_at // GgaAffx.26777.1.S1_s_at // GgaAffx.20192.1.S1_s_at // GgaAffx.21140.1.S1_s_at // Gga.6936.1.A1_at // GgaAffx.1241.1.S1_at // Gga.16450.1.S1_at // GgaAffx.1528.1.S1_at // Gga.19278.1.S1_s_at // Gga.7797.1.S1_s_at // GgaAffx.21433.1.S1_s_at // GgaAffx.26684.1.S1_at // GgaAffx.26446.2.S1_s_at // GgaA…
GO:0006091	P	generation of precursor metabolites and energy	19	456	287	24599	3.1e-06	6.9e-05	// Gga.4909.2.S1_s_at // GgaAffx.21393.1.S1_s_at // GgaAffx.882.2.S1_s_at // Gga.1132.1.S1_at // GgaAffx.13099.1.S1_at // Gga.6085.3.S1_a_at // GgaAffx.8115.3.S1_s_at // GgaAffx.12279.1.S1_s_at // Gga.4989.1.S1_s_at // Gga.4119.1.S1_at // Gga.11674.1.S1_at // GgaAffx.22014.2.S1_s_at // GgaAffx.5541.1.S1_at // GgaAffx.10526.2.S1_s_at // Gga.5623.2.S1_s_at // Gga.19278.1.S1_s_at // GgaAffx.25875.1.…
GO:0070887	P	cellular response to chemical stimulus	13	456	146	24599	4.4e-06	9.6e-05	// GgaAffx.7493.1.S1_s_at // GgaAffx.26777.1.S1_s_at // GgaAffx.6526.1.S1_s_at // GgaAffx.23988.2.S1_s_at // Gga.7212.1.S1_at // GgaAffx.22014.2.S1_s_at // Gga.2475.1.S1_at // GgaAffx.6526.7.S1_s_at // Gga.19278.1.S1_s_at // GgaAffx.21825.1.S1_s_at // GgaAffx.25875.1.S1_s_at // Gga.7797.1.S1_s_at // Gga.4119.1.S1_at
GO:0042221	P	response to chemical stimulus	39	456	924	24599	5.3e-06	0.00011	// GgaAffx.23988.2.S1_s_at // Gga.63.1.S1_s_at // Gga.6936.1.A1_at // Gga.4425.1.S1_at // GgaAffx.6526.7.S1_s_at // Gga.19278.1.S1_s_at // GgaAffx.4023.1.S1_at // Gga.7797.1.S1_s_at // Gga.4119.1.S1_at // GgaAffx.7493.1.S1_s_at // GgaAffx.3622.2.S1_s_at // GgaAffx.21393.1.S1_s_at // GgaAffx.26777.1.S1_s_at // Gga.4989.1.S1_s_at // GgaAffx.21433.1.S1_s_at // Gga.345.1.S1_at // GgaAffx.22014.2.S1_s…
GO:0009308	P	amine metabolic process	48	456	1247	24599	6.3e-06	0.00013	// GgaAffx.916.1.S1_at // Gga.4909.2.S1_s_at // GgaAffx.23641.3.S1_s_at // GgaAffx.4590.1.S1_at // GgaAffx.24899.1.S1_at // GgaAffx.20192.1.S1_s_at // GgaAffx.21140.1.S1_s_at // Gga.16450.1.S1_at // GgaAffx.1528.1.S1_at // Gga.19278.1.S1_s_at // Gga.7556.1.S1_at // GgaAffx.21433.1.S1_s_at // GgaAffx.681.3.S1_s_at // Gga.6085.3.S1_a_at // Gga.4119.1.S1_at // GgaAffx.26684.1.S1_at // Gga.5922.2.S1_…
GO:0044262	P	cellular carbohydrate metabolic process	22	456	397	24599	9.6e-06	0.00018	// Gga.4909.2.S1_s_at // Gga.19278.1.S1_s_at // Gga.4119.1.S1_at // Gga.16371.1.S1_s_at // GgaAffx.711.1.A1_at // GgaAffx.6314.1.S1_s_at // Gga.4006.2.S1_a_at // Gga.4485.2.S1_s_at // GgaAffx.2648.1.S1_s_at // GgaAffx.24924.1.S1_at // GgaAffx.20100.1.S1_at // GgaAffx.23315.1.S1_s_at // GgaAffx.24612.1.S1_at // Gga.9700.2.S1_a_at // GgaAffx.25875.1.S1_s_at // Gga.3864.1.S1_at // Gga.10147.1.S1_at …
GO:0006749	P	glutathione metabolic process	8	456	60	24599	1.6e-05	0.0003	// Gga.7320.1.S1_s_at // GgaAffx.26777.1.S1_s_at // GgaAffx.24934.1.S1_s_at // Gga.6936.1.A1_at // Gga.4223.1.S1_at // GgaAffx.5541.1.S1_at // GgaAffx.26446.2.S1_s_at // Gga.7797.1.S1_s_at
GO:0048562	P	embryonic organ morphogenesis	6	456	30	24599	1.7e-05	0.0003	// GgaAffx.25037.1.S1_at // GgaAffx.25609.2.S1_s_at // GgaAffx.25609.1.S1_at // GgaAffx.20978.1.S1_s_at // GgaAffx.1279.2.S1_s_at // GgaAffx.5095.1.S1_at
GO:0006066	P	alcohol metabolic process	23	456	443	24599	1.7e-05	0.0003	// Gga.4909.2.S1_s_at // GgaAffx.24899.1.S1_at // Gga.19278.1.S1_s_at // Gga.7556.1.S1_at // Gga.4119.1.S1_at // GgaAffx.23840.1.S1_s_at // GgaAffx.6314.1.S1_s_at // Gga.5922.2.S1_a_at // Gga.4006.2.S1_a_at // GgaAffx.2648.1.S1_s_at // GgaAffx.24924.1.S1_at // GgaAffx.22432.1.S1_at // GgaAffx.20100.1.S1_at // Gga.133.1.S1_at // GgaAffx.24899.1.S1_s_at // GgaAffx.24612.1.S1_at // GgaAffx.25875.1.S…
GO:0009410	P	response to xenobiotic stimulus	9	456	84	24599	2.9e-05	0.00048	// GgaAffx.7493.1.S1_s_at // GgaAffx.24934.1.S1_s_at // Gga.7212.1.S1_at // Gga.2475.1.S1_at // GgaAffx.22014.2.S1_s_at // Gga.19278.1.S1_s_at // GgaAffx.21825.1.S1_s_at // GgaAffx.25875.1.S1_s_at // Gga.4119.1.S1_at
GO:0006810	P	transport	97	456	3263	24599	3e-05	0.00049	// GgaAffx.1092.1.S1_s_at // GgaAffx.23641.3.S1_s_at // GgaAffx.25037.1.S1_at // Gga.16527.1.S1_at // GgaAffx.26777.1.S1_s_at // Gga.5522.2.S1_a_at // Gga.7320.1.S1_s_at // Gga.345.1.S1_at // GgaAffx.4059.1.S1_s_at // GgaAffx.882.2.S1_s_at // GgaAffx.25679.1.S1_s_at // Gga.2044.3.S1_a_at // Gga.637.1.S1_at // GgaAffx.10239.1.A1_at // Gga.10147.1.S1_at // GgaAffx.6400.2.S1_s_at // GgaAffx.10526.2.…
GO:0044242	P	cellular lipid catabolic process	14	456	201	24599	3.2e-05	0.0005	// GgaAffx.26610.2.S1_s_at // GgaAffx.4468.1.S1_at // GgaAffx.20100.1.S1_at // GgaAffx.22014.2.S1_s_at // Gga.5922.2.S1_a_at // Gga.11447.1.S1_a_at // GgaAffx.2077.1.S1_s_at // Gga.19278.1.S1_s_at // Gga.4006.2.S1_a_at // GgaAffx.1433.3.S1_s_at // GgaAffx.25875.1.S1_s_at // Gga.7797.1.S1_s_at // Gga.4119.1.S1_at // GgaAffx.23494.1.S1_s_at
GO:0009060	P	aerobic respiration	7	456	49	24599	3.4e-05	0.00052	// Gga.4909.2.S1_s_at // GgaAffx.882.2.S1_s_at // Gga.1132.1.S1_at // Gga.6085.3.S1_a_at // GgaAffx.12279.1.S1_s_at // GgaAffx.5541.1.S1_at // Gga.5623.2.S1_s_at
GO:0051234	P	establishment of localization	97	456	3279	24599	3.6e-05	0.00053	// GgaAffx.1092.1.S1_s_at // GgaAffx.23641.3.S1_s_at // GgaAffx.25037.1.S1_at // Gga.16527.1.S1_at // GgaAffx.26777.1.S1_s_at // Gga.5522.2.S1_a_at // Gga.7320.1.S1_s_at // Gga.345.1.S1_at // GgaAffx.4059.1.S1_s_at // GgaAffx.882.2.S1_s_at // GgaAffx.25679.1.S1_s_at // Gga.2044.3.S1_a_at // Gga.637.1.S1_at // GgaAffx.10239.1.A1_at // Gga.10147.1.S1_at // GgaAffx.6400.2.S1_s_at // GgaAffx.10526.2.…
GO:0006811	P	ion transport	49	456	1381	24599	3.9e-05	0.00055	// GgaAffx.1092.1.S1_s_at // GgaAffx.25037.1.S1_at // GgaAffx.1852.2.S1_s_at // GgaAffx.13099.1.S1_at // Gga.18973.1.S1_at // GgaAffx.10239.1.S1_at // GgaAffx.4023.1.S1_at // GgaAffx.10526.2.S1_s_at // Gga.18491.1.S1_s_at // GgaAffx.25789.4.S1_s_at // Gga.5522.2.S1_a_at // GgaAffx.8122.1.S1_at // GgaAffx.882.2.S1_s_at // GgaAffx.7796.1.S1_s_at // GgaAffx.2712.2.S1_s_at // GgaAffx.23508.1.S1_at //…
GO:0015849	P	organic acid transport	13	456	181	24599	4.4e-05	0.00059	// GgaAffx.21393.1.S1_s_at // GgaAffx.22425.1.S1_s_at // GgaAffx.9798.1.S1_at // Gga.3864.1.S1_at // Gga.4425.1.S1_at // GgaAffx.6107.1.S1_s_at // Gga.4006.2.S1_a_at // GgaAffx.2712.2.S1_s_at // Gga.18491.1.S1_s_at // Gga.11343.1.S1_at // GgaAffx.25789.4.S1_s_at // Gga.5522.2.S1_a_at // GgaAffx.10140.2.S1_s_at
GO:0046942	P	carboxylic acid transport	13	456	181	24599	4.4e-05	0.00059	// GgaAffx.21393.1.S1_s_at // GgaAffx.22425.1.S1_s_at // GgaAffx.9798.1.S1_at // Gga.3864.1.S1_at // Gga.4425.1.S1_at // GgaAffx.6107.1.S1_s_at // Gga.4006.2.S1_a_at // GgaAffx.2712.2.S1_s_at // Gga.18491.1.S1_s_at // Gga.11343.1.S1_at // GgaAffx.25789.4.S1_s_at // Gga.5522.2.S1_a_at // GgaAffx.10140.2.S1_s_at
GO:0006635	P	fatty acid beta-oxidation	5	456	23	24599	5.7e-05	0.00075	// GgaAffx.1433.3.S1_s_at // GgaAffx.20100.1.S1_at // GgaAffx.22014.2.S1_s_at // GgaAffx.4468.1.S1_at // Gga.4006.2.S1_a_at
GO:0048568	P	embryonic organ development	8	456	72	24599	6.2e-05	0.00079	// GgaAffx.25609.1.S1_at // GgaAffx.25037.1.S1_at // GgaAffx.25609.2.S1_s_at // GgaAffx.22594.1.S1_s_at // Gga.345.1.S1_at // GgaAffx.20978.1.S1_s_at // GgaAffx.1279.2.S1_s_at // GgaAffx.5095.1.S1_at
GO:0006694	P	steroid biosynthetic process	9	456	93	24599	6.5e-05	0.00082	// GgaAffx.7407.1.S1_s_at // GgaAffx.25875.1.S1_s_at // Gga.16586.1.S1_at // Gga.18930.2.S1_a_at // GgaAffx.2077.1.S1_s_at // Gga.19278.1.S1_s_at // GgaAffx.1474.1.S1_at // Gga.7254.2.S1_a_at // Gga.4119.1.S1_at
GO:0006699	P	bile acid biosynthetic process	5	456	24	24599	7.1e-05	0.00087	// GgaAffx.25875.1.S1_s_at // GgaAffx.2077.1.S1_s_at // Gga.19278.1.S1_s_at // Gga.4119.1.S1_at // Gga.16586.1.S1_at
GO:0044248	P	cellular catabolic process	35	456	903	24599	7.9e-05	0.00094	// Gga.4909.2.S1_s_at // GgaAffx.1852.2.S1_s_at // Gga.1132.1.S1_at // Gga.4425.1.S1_at // Gga.19278.1.S1_s_at // Gga.5623.2.S1_s_at // Gga.7556.1.S1_at // Gga.7797.1.S1_s_at // Gga.4119.1.S1_at // GgaAffx.4468.1.S1_at // GgaAffx.8298.1.S1_at // Gga.345.1.S1_at // Gga.6085.3.S1_a_at // GgaAffx.25677.1.S1_s_at // GgaAffx.6799.1.S1_s_at // GgaAffx.6314.1.S1_s_at // Gga.5922.2.S1_a_at // GgaAffx.220…
GO:0006099	P	tricarboxylic acid cycle	6	456	40	24599	9.4e-05	0.001	// Gga.4909.2.S1_s_at // Gga.1132.1.S1_at // Gga.6085.3.S1_a_at // GgaAffx.12279.1.S1_s_at // GgaAffx.5541.1.S1_at // Gga.5623.2.S1_s_at
GO:0046356	P	acetyl-CoA catabolic process	6	456	40	24599	9.4e-05	0.001	// Gga.4909.2.S1_s_at // Gga.1132.1.S1_at // Gga.6085.3.S1_a_at // GgaAffx.12279.1.S1_s_at // GgaAffx.5541.1.S1_at // Gga.5623.2.S1_s_at
GO:0044106	P	cellular amine metabolic process	39	456	1057	24599	9.3e-05	0.001	// Gga.4909.2.S1_s_at // GgaAffx.23641.3.S1_s_at // GgaAffx.4590.1.S1_at // GgaAffx.24899.1.S1_at // GgaAffx.20192.1.S1_s_at // GgaAffx.21140.1.S1_s_at // Gga.4425.1.S1_at // GgaAffx.1528.1.S1_at // Gga.19278.1.S1_s_at // Gga.4119.1.S1_at // GgaAffx.681.3.S1_s_at // Gga.6085.3.S1_a_at // GgaAffx.21433.1.S1_s_at // GgaAffx.26684.1.S1_at // Gga.5922.2.S1_a_at // GgaAffx.22014.2.S1_s_at // GgaAffx.5…
GO:0006633	P	fatty acid biosynthetic process	9	456	101	24599	0.00012	0.0013	// GgaAffx.25618.1.S1_at // GgaAffx.23089.1.S1_at // GgaAffx.26414.1.S1_s_at // GgaAffx.23089.1.S1_s_at // Gga.4989.1.S1_s_at // GgaAffx.22014.2.S1_s_at // Gga.8312.3.S1_at // Gga.8312.4.S1_a_at // GgaAffx.2648.1.S1_s_at
GO:0009109	P	coenzyme catabolic process	6	456	42	24599	0.00012	0.0013	// Gga.4909.2.S1_s_at // Gga.1132.1.S1_at // Gga.6085.3.S1_a_at // GgaAffx.12279.1.S1_s_at // GgaAffx.5541.1.S1_at // Gga.5623.2.S1_s_at
GO:0006805	P	xenobiotic metabolic process	8	456	80	24599	0.00013	0.0014	// GgaAffx.7493.1.S1_s_at // Gga.7212.1.S1_at // Gga.2475.1.S1_at // GgaAffx.22014.2.S1_s_at // Gga.19278.1.S1_s_at // GgaAffx.21825.1.S1_s_at // GgaAffx.25875.1.S1_s_at // Gga.4119.1.S1_at
GO:0065008	P	regulation of biological quality	49	456	1459	24599	0.00014	0.0014	// Gga.4909.2.S1_s_at // Gga.9347.3.S1_a_at // GgaAffx.198.1.S1_at // GgaAffx.24899.1.S1_at // GgaAffx.26777.1.S1_s_at // GgaAffx.20192.1.S1_s_at // GgaAffx.2055.1.S1_s_at // Gga.6936.1.A1_at // Gga.6009.1.S1_s_at // GgaAffx.25609.2.S1_s_at // Gga.19278.1.S1_s_at // GgaAffx.25247.1.S1_at // GgaAffx.4023.1.S1_at // Gga.5856.1.S1_at // Gga.7556.1.S1_at // Gga.4119.1.S1_at // GgaAffx.22855.1.S1_at /…
GO:0045333	P	cellular respiration	9	456	106	24599	0.00018	0.0018	// Gga.4909.2.S1_s_at // GgaAffx.21393.1.S1_s_at // GgaAffx.882.2.S1_s_at // Gga.1132.1.S1_at // Gga.6085.3.S1_a_at // GgaAffx.12279.1.S1_s_at // Gga.4989.1.S1_s_at // GgaAffx.5541.1.S1_at // Gga.5623.2.S1_s_at
GO:0034440	P	lipid oxidation	5	456	30	24599	0.00022	0.0019	// GgaAffx.1433.3.S1_s_at // GgaAffx.20100.1.S1_at // GgaAffx.22014.2.S1_s_at // GgaAffx.4468.1.S1_at // Gga.4006.2.S1_a_at
GO:0051187	P	cofactor catabolic process	6	456	46	24599	0.00021	0.0019	// Gga.4909.2.S1_s_at // Gga.1132.1.S1_at // Gga.6085.3.S1_a_at // GgaAffx.12279.1.S1_s_at // GgaAffx.5541.1.S1_at // Gga.5623.2.S1_s_at
GO:0019395	P	fatty acid oxidation	5	456	30	24599	0.00022	0.0019	// GgaAffx.1433.3.S1_s_at // GgaAffx.20100.1.S1_at // GgaAffx.22014.2.S1_s_at // GgaAffx.4468.1.S1_at // Gga.4006.2.S1_a_at
GO:0006720	P	isoprenoid metabolic process	6	456	46	24599	0.00021	0.0019	// GgaAffx.23840.1.S1_s_at // GgaAffx.22014.2.S1_s_at // GgaAffx.2077.1.S1_s_at // Gga.19278.1.S1_s_at // GgaAffx.25875.1.S1_s_at // Gga.4119.1.S1_at
GO:0016042	P	lipid catabolic process	14	456	240	24599	0.00021	0.0019	// GgaAffx.26610.2.S1_s_at // GgaAffx.4468.1.S1_at // GgaAffx.20100.1.S1_at // GgaAffx.22014.2.S1_s_at // Gga.5922.2.S1_a_at // Gga.11447.1.S1_a_at // GgaAffx.2077.1.S1_s_at // Gga.19278.1.S1_s_at // Gga.4006.2.S1_a_at // GgaAffx.1433.3.S1_s_at // GgaAffx.25875.1.S1_s_at // Gga.7797.1.S1_s_at // Gga.4119.1.S1_at // GgaAffx.23494.1.S1_s_at
GO:0006084	P	acetyl-CoA metabolic process	6	456	46	24599	0.00021	0.0019	// Gga.4909.2.S1_s_at // Gga.1132.1.S1_at // Gga.6085.3.S1_a_at // GgaAffx.12279.1.S1_s_at // GgaAffx.5541.1.S1_at // Gga.5623.2.S1_s_at
GO:0006518	P	peptide metabolic process	8	456	88	24599	0.00025	0.0022	// Gga.7320.1.S1_s_at // GgaAffx.26777.1.S1_s_at // GgaAffx.24934.1.S1_s_at // Gga.6936.1.A1_at // Gga.4223.1.S1_at // GgaAffx.5541.1.S1_at // GgaAffx.26446.2.S1_s_at // Gga.7797.1.S1_s_at
GO:0010035	P	response to inorganic substance	8	456	89	24599	0.00027	0.0023	// GgaAffx.25682.1.S1_s_at // GgaAffx.21393.1.S1_s_at // GgaAffx.26777.1.S1_s_at // Gga.63.1.S1_s_at // GgaAffx.24934.1.S1_s_at // Gga.4989.1.S1_s_at // GgaAffx.21825.1.S1_s_at // Gga.7797.1.S1_s_at
GO:0046395	P	carboxylic acid catabolic process	11	456	163	24599	0.00028	0.0023	// GgaAffx.4468.1.S1_at // Gga.16450.1.S1_at // GgaAffx.20100.1.S1_at // Gga.4425.1.S1_at // GgaAffx.22014.2.S1_s_at // Gga.19278.1.S1_s_at // Gga.4006.2.S1_a_at // Gga.6085.3.S1_a_at // GgaAffx.1433.3.S1_s_at // GgaAffx.25875.1.S1_s_at // Gga.4119.1.S1_at
GO:0005975	P	carbohydrate metabolic process	26	456	639	24599	0.00028	0.0023	// GgaAffx.916.1.S1_at // Gga.4909.2.S1_s_at // Gga.19278.1.S1_s_at // Gga.7556.1.S1_at // Gga.9700.2.S1_a_at // Gga.4119.1.S1_at // Gga.16371.1.S1_s_at // GgaAffx.6314.1.S1_s_at // Gga.4006.2.S1_a_at // Gga.4485.2.S1_s_at // GgaAffx.2648.1.S1_s_at // GgaAffx.24924.1.S1_at // GgaAffx.20100.1.S1_at // GgaAffx.10169.1.S1_at // GgaAffx.23315.1.S1_s_at // GgaAffx.24612.1.S1_at // GgaAffx.24553.1.S1_a…
GO:0016054	P	organic acid catabolic process	11	456	163	24599	0.00028	0.0023	// GgaAffx.4468.1.S1_at // Gga.16450.1.S1_at // GgaAffx.20100.1.S1_at // Gga.4425.1.S1_at // GgaAffx.22014.2.S1_s_at // Gga.19278.1.S1_s_at // Gga.4006.2.S1_a_at // Gga.6085.3.S1_a_at // GgaAffx.1433.3.S1_s_at // GgaAffx.25875.1.S1_s_at // Gga.4119.1.S1_at
GO:0009062	P	fatty acid catabolic process	5	456	32	24599	0.0003	0.0024	// GgaAffx.1433.3.S1_s_at // GgaAffx.20100.1.S1_at // GgaAffx.22014.2.S1_s_at // GgaAffx.4468.1.S1_at // Gga.4006.2.S1_a_at
GO:0009066	P	aspartate family amino acid metabolic process	11	456	164	24599	0.0003	0.0024	// Gga.4909.2.S1_s_at // GgaAffx.9792.1.S1_at // Gga.6085.3.S1_a_at // Gga.12996.1.S1_at // GgaAffx.10350.1.S1_at // Gga.4425.1.S1_at // GgaAffx.22014.2.S1_s_at // Gga.19278.1.S1_s_at // GgaAffx.26483.1.S1_s_at // GgaAffx.25875.1.S1_s_at // Gga.4119.1.S1_at
GO:0051179	P	localization	103	456	3768	24599	0.00033	0.0025	// GgaAffx.1092.1.S1_s_at // GgaAffx.23641.3.S1_s_at // GgaAffx.25037.1.S1_at // Gga.16527.1.S1_at // GgaAffx.26777.1.S1_s_at // Gga.5522.2.S1_a_at // Gga.7320.1.S1_s_at // Gga.345.1.S1_at // GgaAffx.4059.1.S1_s_at // GgaAffx.882.2.S1_s_at // GgaAffx.25679.1.S1_s_at // Gga.2044.3.S1_a_at // Gga.637.1.S1_at // GgaAffx.10239.1.A1_at // Gga.10147.1.S1_at // GgaAffx.6400.2.S1_s_at // GgaAffx.10526.2.…
GO:0006118	P	electron transport	28	456	724	24599	0.00037	0.0029	// Gga.4909.2.S1_s_at // GgaAffx.24899.1.S1_at // GgaAffx.26777.1.S1_s_at // Gga.63.1.S1_s_at // Gga.6936.1.A1_at // Gga.11674.1.S1_at // Gga.16450.1.S1_at // GgaAffx.1143.1.S1_s_at // Gga.8980.1.S1_s_at // Gga.3053.1.S1_at // Gga.3447.1.S1_at // GgaAffx.2444.1.S1_at // GgaAffx.4468.1.S1_at // Gga.7320.1.S1_s_at // GgaAffx.25114.1.S1_at // Gga.4048.1.S1_at // Gga.4989.1.S1_s_at // Gga.5397.1.S1_a…
GO:0010817	P	regulation of hormone levels	12	456	198	24599	0.00041	0.0031	// Gga.133.1.S1_at // GgaAffx.23840.1.S1_s_at // GgaAffx.20100.1.S1_at // Gga.8293.1.S1_at // Gga.18930.2.S1_a_at // Gga.19278.1.S1_s_at // GgaAffx.4006.1.S1_at // GgaAffx.4023.1.S1_at // GgaAffx.25875.1.S1_s_at // Gga.4119.1.S1_at // Gga.345.1.S1_at // GgaAffx.1474.1.S1_at
GO:0006672	P	ceramide metabolic process	6	456	53	24599	0.00046	0.0034	// GgaAffx.193.2.S1_s_at // GgaAffx.193.1.S1_at // GgaAffx.23361.1.S1_at // Gga.8411.3.S1_s_at // Gga.7556.1.S1_at // GgaAffx.711.1.A1_at
GO:0006576	P	cellular biogenic amine metabolic process	11	456	175	24599	0.00051	0.0037	// GgaAffx.24899.1.S1_at // Gga.5922.2.S1_a_at // GgaAffx.20100.1.S1_at // GgaAffx.12570.1.S1_s_at // Gga.4425.1.S1_at // GgaAffx.22014.2.S1_s_at // Gga.19278.1.S1_s_at // GgaAffx.24899.1.S1_s_at // GgaAffx.26483.1.S1_s_at // GgaAffx.25875.1.S1_s_at // Gga.4119.1.S1_at
GO:0015917	P	aminophospholipid transport	5	456	36	24599	0.00052	0.0037	// GgaAffx.10968.1.S1_at // GgaAffx.1092.1.S1_s_at // Gga.18491.1.S1_s_at // GgaAffx.25789.4.S1_s_at // GgaAffx.10968.2.S1_s_at
GO:0015711	P	organic anion transport	7	456	75	24599	0.00052	0.0037	// GgaAffx.21393.1.S1_s_at // GgaAffx.22425.1.S1_s_at // GgaAffx.4984.1.S1_at // GgaAffx.9798.1.S1_at // Gga.5522.2.S1_a_at // GgaAffx.4984.2.S1_s_at // Gga.3864.1.S1_at
GO:0008152	P	metabolic process	211	456	8627	24599	0.00054	0.0038	// GgaAffx.23641.3.S1_s_at // Gga.1132.1.S1_at // GgaAffx.20192.1.S1_s_at // GgaAffx.1528.1.S1_at // Gga.19278.1.S1_s_at // Gga.8312.3.S1_at // GgaAffx.24553.1.S1_at // Gga.7797.1.S1_s_at // Gga.2908.1.S1_at // GgaAffx.5095.1.S1_at // GgaAffx.9403.1.S1_s_at // GgaAffx.26684.1.S1_at // GgaAffx.21962.1.S1_at // GgaAffx.681.3.S1_s_at // Gga.7320.1.S1_s_at // GgaAffx.24000.1.S1_s_at // GgaAffx.7526.1…
GO:0006725	P	cellular aromatic compound metabolic process	23	456	563	24599	0.00056	0.0038	// GgaAffx.1852.2.S1_s_at // GgaAffx.26777.1.S1_s_at // GgaAffx.25940.1.S1_at // Gga.4425.1.S1_at // Gga.19278.1.S1_s_at // Gga.4119.1.S1_at // GgaAffx.21140.1.S1_s_at // Gga.7320.1.S1_s_at // GgaAffx.25677.1.S1_s_at // GgaAffx.22014.2.S1_s_at // GgaAffx.7522.1.S1_s_at // GgaAffx.9792.1.S1_at // GgaAffx.23111.1.S1_s_at // GgaAffx.12279.1.S1_s_at // Gga.7212.1.S1_at // Gga.133.1.S1_at // GgaAffx.2…
GO:0046519	P	sphingoid metabolic process	6	456	55	24599	0.00056	0.0038	// GgaAffx.193.2.S1_s_at // GgaAffx.193.1.S1_at // GgaAffx.23361.1.S1_at // Gga.8411.3.S1_s_at // Gga.7556.1.S1_at // GgaAffx.711.1.A1_at
GO:0042434	P	indole derivative metabolic process	7	456	79	24599	0.00071	0.0046	// GgaAffx.24899.1.S1_at // Gga.4425.1.S1_at // GgaAffx.22014.2.S1_s_at // Gga.19278.1.S1_s_at // GgaAffx.24899.1.S1_s_at // GgaAffx.25875.1.S1_s_at // Gga.4119.1.S1_at
GO:0006586	P	indolalkylamine metabolic process	7	456	79	24599	0.00071	0.0046	// GgaAffx.24899.1.S1_at // Gga.4425.1.S1_at // GgaAffx.22014.2.S1_s_at // Gga.19278.1.S1_s_at // GgaAffx.24899.1.S1_s_at // GgaAffx.25875.1.S1_s_at // Gga.4119.1.S1_at
GO:0042430	P	indole and derivative metabolic process	7	456	79	24599	0.00071	0.0046	// GgaAffx.24899.1.S1_at // Gga.4425.1.S1_at // GgaAffx.22014.2.S1_s_at // Gga.19278.1.S1_s_at // GgaAffx.24899.1.S1_s_at // GgaAffx.25875.1.S1_s_at // Gga.4119.1.S1_at
GO:0030029	P	actin filament-based process	16	456	334	24599	0.00069	0.0046	// GgaAffx.24513.9.S1_s_at // Gga.12255.1.S1_s_at // GgaAffx.2572.1.S1_at // GgaAffx.23988.2.S1_s_at // GgaAffx.23564.2.S1_s_at // GgaAffx.5630.9.S1_s_at // GgaAffx.10417.7.S1_s_at // GgaAffx.25247.1.S1_at // GgaAffx.25609.2.S1_s_at // GgaAffx.25609.1.S1_at // GgaAffx.8655.1.S1_s_at // GgaAffx.1279.2.S1_s_at // GgaAffx.23988.1.S1_at // GgaAffx.24513.7.S1_s_at // GgaAffx.8894.1.S1_at // Gga.637.1.…
GO:0042445	P	hormone metabolic process	9	456	128	24599	0.00072	0.0046	// Gga.133.1.S1_at // GgaAffx.23840.1.S1_s_at // Gga.8293.1.S1_at // Gga.18930.2.S1_a_at // Gga.19278.1.S1_s_at // GgaAffx.1474.1.S1_at // GgaAffx.25875.1.S1_s_at // Gga.4119.1.S1_at // Gga.345.1.S1_at
GO:0009068	P	aspartate family amino acid catabolic process	6	456	58	24599	0.00074	0.0047	// Gga.6085.3.S1_a_at // Gga.4425.1.S1_at // GgaAffx.22014.2.S1_s_at // Gga.19278.1.S1_s_at // GgaAffx.25875.1.S1_s_at // Gga.4119.1.S1_at
GO:0030203	P	glycosaminoglycan metabolic process	8	456	104	24599	0.00078	0.0048	// GgaAffx.916.1.S1_at // Gga.7556.1.S1_at // GgaAffx.10169.1.S1_at // Gga.8411.3.S1_s_at // GgaAffx.24612.1.S1_at // GgaAffx.24553.1.S1_at // GgaAffx.9083.1.S1_at // GgaAffx.711.1.A1_at
GO:0015718	P	monocarboxylic acid transport	6	456	59	24599	0.00082	0.005	// GgaAffx.22425.1.S1_s_at // Gga.4425.1.S1_at // Gga.4006.2.S1_a_at // Gga.18491.1.S1_s_at // GgaAffx.25789.4.S1_s_at // GgaAffx.10140.2.S1_s_at
GO:0015980	P	energy derivation by oxidation of organic compounds	10	456	158	24599	0.00085	0.0052	// Gga.4909.2.S1_s_at // GgaAffx.21393.1.S1_s_at // GgaAffx.882.2.S1_s_at // Gga.1132.1.S1_at // Gga.6085.3.S1_a_at // GgaAffx.12279.1.S1_s_at // Gga.4989.1.S1_s_at // GgaAffx.5541.1.S1_at // Gga.5623.2.S1_s_at // GgaAffx.22340.1.S1_s_at
GO:0006560	P	proline metabolic process	6	456	60	24599	0.00089	0.0053	// Gga.4425.1.S1_at // GgaAffx.20192.1.S1_s_at // Gga.16450.1.S1_at // Gga.19278.1.S1_s_at // GgaAffx.25875.1.S1_s_at // Gga.4119.1.S1_at
GO:0019318	P	hexose metabolic process	12	456	219	24599	0.00098	0.0058	// Gga.4909.2.S1_s_at // GgaAffx.2648.1.S1_s_at // GgaAffx.20100.1.S1_at // GgaAffx.25392.2.S1_s_at // GgaAffx.22340.1.S1_s_at // Gga.19278.1.S1_s_at // Gga.4006.2.S1_a_at // GgaAffx.24612.1.S1_at // GgaAffx.6314.1.S1_s_at // GgaAffx.9083.1.S1_at // Gga.4119.1.S1_at // GgaAffx.25875.1.S1_s_at
GO:0006022	P	aminoglycan metabolic process	8	456	108	24599	0.001	0.0058	// GgaAffx.916.1.S1_at // Gga.7556.1.S1_at // GgaAffx.10169.1.S1_at // Gga.8411.3.S1_s_at // GgaAffx.24612.1.S1_at // GgaAffx.24553.1.S1_at // GgaAffx.9083.1.S1_at // GgaAffx.711.1.A1_at
GO:0006006	P	glucose metabolic process	10	456	162	24599	0.001	0.006	// Gga.4909.2.S1_s_at // GgaAffx.2648.1.S1_s_at // GgaAffx.20100.1.S1_at // GgaAffx.22340.1.S1_s_at // Gga.19278.1.S1_s_at // Gga.4006.2.S1_a_at // GgaAffx.6314.1.S1_s_at // GgaAffx.9083.1.S1_at // Gga.4119.1.S1_at // GgaAffx.25875.1.S1_s_at
GO:0006119	P	oxidative phosphorylation	8	456	109	24599	0.0011	0.0061	// Gga.4909.2.S1_s_at // GgaAffx.882.2.S1_s_at // GgaAffx.13099.1.S1_at // GgaAffx.8115.3.S1_s_at // Gga.11674.1.S1_at // Gga.4989.1.S1_s_at // GgaAffx.10526.2.S1_s_at // GgaAffx.10104.2.S1_s_at
GO:0007588	P	excretion	5	456	42	24599	0.0011	0.0061	// GgaAffx.13099.1.S1_at // Gga.11950.1.S1_s_at // GgaAffx.8115.3.S1_s_at // GgaAffx.4984.2.S1_s_at // GgaAffx.4984.1.S1_at
GO:0046483	P	heterocycle metabolic process	25	456	670	24599	0.0012	0.0066	// GgaAffx.24899.1.S1_s_at // GgaAffx.24899.1.S1_at // GgaAffx.26777.1.S1_s_at // GgaAffx.20192.1.S1_s_at // GgaAffx.25940.1.S1_at // Gga.4425.1.S1_at // Gga.19278.1.S1_s_at // GgaAffx.6314.1.S1_s_at // GgaAffx.21393.1.S1_s_at // GgaAffx.1852.2.S1_s_at // Gga.7320.1.S1_s_at // GgaAffx.25677.1.S1_s_at // Gga.4119.1.S1_at // GgaAffx.22014.2.S1_s_at // GgaAffx.10104.2.S1_s_at // GgaAffx.7522.1.S1_s_…
GO:0000096	P	sulfur amino acid metabolic process	5	456	43	24599	0.0012	0.0066	// Gga.4425.1.S1_at // GgaAffx.9792.1.S1_at // GgaAffx.24934.1.S1_s_at // Gga.12996.1.S1_at // GgaAffx.10350.1.S1_at
GO:0019748	P	secondary metabolic process	8	456	112	24599	0.0013	0.0068	// GgaAffx.23840.1.S1_s_at // GgaAffx.907.1.S1_at // Gga.14395.1.S1_s_at // Gga.4119.1.S1_at // Gga.4425.1.S1_at // Gga.51.1.S1_at // GgaAffx.6314.1.S1_s_at // GgaAffx.22036.3.S1_s_at
GO:0006820	P	anion transport	14	456	288	24599	0.0012	0.0068	// GgaAffx.9310.1.S1_s_at // GgaAffx.22425.1.S1_s_at // GgaAffx.21393.1.S1_s_at // GgaAffx.10140.2.S1_s_at // GgaAffx.1852.2.S1_s_at // GgaAffx.9798.1.S1_at // GgaAffx.25677.1.S1_s_at // GgaAffx.5008.1.S1_at // GgaAffx.4984.2.S1_s_at // Gga.3864.1.S1_at // GgaAffx.4984.1.S1_at // GgaAffx.23134.1.S1_at // Gga.5522.2.S1_a_at // GgaAffx.25037.1.S1_at
GO:0005996	P	monosaccharide metabolic process	13	456	256	24599	0.0012	0.0068	// Gga.4909.2.S1_s_at // GgaAffx.2648.1.S1_s_at // GgaAffx.20100.1.S1_at // GgaAffx.25392.2.S1_s_at // Gga.4119.1.S1_at // Gga.8411.3.S1_s_at // Gga.19278.1.S1_s_at // Gga.4006.2.S1_a_at // GgaAffx.24612.1.S1_at // GgaAffx.6314.1.S1_s_at // GgaAffx.9083.1.S1_at // GgaAffx.22340.1.S1_s_at // GgaAffx.25875.1.S1_s_at
GO:0006525	P	arginine metabolic process	6	456	65	24599	0.0014	0.0072	// Gga.4425.1.S1_at // GgaAffx.20192.1.S1_s_at // Gga.16450.1.S1_at // Gga.19278.1.S1_s_at // GgaAffx.25875.1.S1_s_at // Gga.4119.1.S1_at
GO:0030258	P	lipid modification	7	456	89	24599	0.0014	0.0075	// GgaAffx.4468.1.S1_at // GgaAffx.20100.1.S1_at // GgaAffx.7526.1.S1_at // GgaAffx.22014.2.S1_s_at // Gga.4006.2.S1_a_at // GgaAffx.1433.3.S1_s_at // GgaAffx.681.3.S1_s_at
GO:0090046	P	regulation of transcription regulator activity	5	456	45	24599	0.0015	0.0076	// Gga.345.1.S1_at // GgaAffx.25648.2.S1_s_at // GgaAffx.2639.1.S1_at // Gga.502.1.S1_at // GgaAffx.2648.1.S1_s_at
GO:0051090	P	regulation of transcription factor activity	5	456	45	24599	0.0015	0.0076	// Gga.345.1.S1_at // GgaAffx.25648.2.S1_s_at // GgaAffx.2639.1.S1_at // Gga.502.1.S1_at // GgaAffx.2648.1.S1_s_at
GO:0044237	P	cellular metabolic process	182	456	7549	24599	0.0017	0.0086	// GgaAffx.23641.3.S1_s_at // Gga.1132.1.S1_at // GgaAffx.20192.1.S1_s_at // GgaAffx.1528.1.S1_at // Gga.19278.1.S1_s_at // Gga.8312.3.S1_at // Gga.7797.1.S1_s_at // Gga.2908.1.S1_at // GgaAffx.5095.1.S1_at // GgaAffx.9403.1.S1_s_at // GgaAffx.681.3.S1_s_at // Gga.7320.1.S1_s_at // GgaAffx.24000.1.S1_s_at // GgaAffx.7526.1.S1_at // Gga.8293.1.S1_at // Gga.5922.2.S1_a_at // GgaAffx.22014.2.S1_s_at…
GO:0009310	P	amine catabolic process	9	456	145	24599	0.0017	0.0086	// GgaAffx.24899.1.S1_at // Gga.4425.1.S1_at // Gga.6085.3.S1_a_at // Gga.16450.1.S1_at // GgaAffx.22014.2.S1_s_at // Gga.19278.1.S1_s_at // GgaAffx.24899.1.S1_s_at // GgaAffx.25875.1.S1_s_at // Gga.4119.1.S1_at
GO:0044272	P	sulfur compound biosynthetic process	7	456	92	24599	0.0017	0.0086	// GgaAffx.916.1.S1_at // GgaAffx.9792.1.S1_at // GgaAffx.24934.1.S1_s_at // GgaAffx.10350.1.S1_at // GgaAffx.10169.1.S1_at // GgaAffx.24553.1.S1_at // GgaAffx.711.1.A1_at
GO:0015992	P	proton transport	9	456	147	24599	0.0019	0.0093	// GgaAffx.2712.2.S1_s_at // GgaAffx.882.2.S1_s_at // GgaAffx.13099.1.S1_at // GgaAffx.8115.3.S1_s_at // GgaAffx.10104.2.S1_s_at // Gga.4989.1.S1_s_at // GgaAffx.10526.2.S1_s_at // GgaAffx.198.1.S1_at // GgaAffx.22036.3.S1_s_at
GO:0033036	P	macromolecule localization	33	456	1005	24599	0.0019	0.0093	// GgaAffx.1092.1.S1_s_at // GgaAffx.25037.1.S1_at // Gga.16527.1.S1_at // GgaAffx.26038.1.S1_at // Gga.4425.1.S1_at // GgaAffx.10564.2.S1_s_at // Gga.18491.1.S1_s_at // GgaAffx.25789.4.S1_s_at // GgaAffx.10968.1.S1_at // Gga.11343.1.S1_at // GgaAffx.25609.1.S1_at // Gga.345.1.S1_at // Gga.4006.2.S1_a_at // Gga.6118.1.S1_at // GgaAffx.2648.1.S1_s_at // GgaAffx.10968.2.S1_s_at // GgaAffx.9516.1.S1…
GO:0006885	P	regulation of pH	5	456	48	24599	0.002	0.0094	// GgaAffx.13099.1.S1_at // Gga.5856.1.S1_at // GgaAffx.8115.3.S1_s_at // Gga.7556.1.S1_at // GgaAffx.198.1.S1_at
GO:0006520	P	cellular amino acid metabolic process	34	456	1047	24599	0.002	0.0094	// Gga.4909.2.S1_s_at // GgaAffx.23641.3.S1_s_at // GgaAffx.4590.1.S1_at // GgaAffx.21140.1.S1_s_at // GgaAffx.20192.1.S1_s_at // Gga.4425.1.S1_at // GgaAffx.1528.1.S1_at // Gga.19278.1.S1_s_at // Gga.4119.1.S1_at // GgaAffx.681.3.S1_s_at // Gga.6085.3.S1_a_at // GgaAffx.21433.1.S1_s_at // GgaAffx.26684.1.S1_at // GgaAffx.22014.2.S1_s_at // GgaAffx.549.1.S1_at // GgaAffx.26288.1.S1_s_at // Gga.19…
GO:0006812	P	cation transport	35	456	1087	24599	0.002	0.0094	// GgaAffx.1092.1.S1_s_at // GgaAffx.13099.1.S1_at // Gga.18973.1.S1_at // GgaAffx.10239.1.S1_at // GgaAffx.4023.1.S1_at // Gga.18491.1.S1_s_at // GgaAffx.25789.4.S1_s_at // GgaAffx.7796.1.S1_s_at // GgaAffx.23508.1.S1_at // Gga.4989.1.S1_s_at // GgaAffx.10104.2.S1_s_at // GgaAffx.2648.1.S1_s_at // GgaAffx.10968.2.S1_s_at // Gga.19274.1.S1_s_at // GgaAffx.10968.1.S1_at // GgaAffx.9792.1.S1_at // …
GO:0006796	P	phosphate metabolic process	46	456	1539	24599	0.0021	0.0096	// GgaAffx.6023.1.S1_at // Gga.9347.3.S1_a_at // GgaAffx.25677.1.S1_s_at // GgaAffx.23641.3.S1_s_at // GgaAffx.4590.1.S1_at // GgaAffx.1852.2.S1_s_at // Gga.4909.2.S1_s_at // GgaAffx.13099.1.S1_at // GgaAffx.26299.1.S1_s_at // Gga.11674.1.S1_at // GgaAffx.24503.1.S1_s_at // GgaAffx.1528.1.S1_at // GgaAffx.21433.1.S1_s_at // GgaAffx.3218.1.S1_s_at // Gga.14253.1.S1_at // Gga.18461.1.S1_s_at // Gga…
GO:0006793	P	phosphorus metabolic process	46	456	1539	24599	0.0021	0.0096	// GgaAffx.6023.1.S1_at // Gga.9347.3.S1_a_at // GgaAffx.25677.1.S1_s_at // GgaAffx.23641.3.S1_s_at // GgaAffx.4590.1.S1_at // GgaAffx.1852.2.S1_s_at // Gga.4909.2.S1_s_at // GgaAffx.13099.1.S1_at // GgaAffx.26299.1.S1_s_at // Gga.11674.1.S1_at // GgaAffx.24503.1.S1_s_at // GgaAffx.1528.1.S1_at // GgaAffx.21433.1.S1_s_at // GgaAffx.3218.1.S1_s_at // Gga.14253.1.S1_at // Gga.18461.1.S1_s_at // Gga…
GO:0006818	P	hydrogen transport	9	456	149	24599	0.0021	0.0096	// GgaAffx.2712.2.S1_s_at // GgaAffx.882.2.S1_s_at // GgaAffx.13099.1.S1_at // GgaAffx.8115.3.S1_s_at // GgaAffx.10104.2.S1_s_at // Gga.4989.1.S1_s_at // GgaAffx.10526.2.S1_s_at // GgaAffx.198.1.S1_at // GgaAffx.22036.3.S1_s_at
GO:0006979	P	response to oxidative stress	8	456	122	24599	0.0022	0.0099	// Gga.3864.1.S1_at // GgaAffx.26777.1.S1_s_at // GgaAffx.24934.1.S1_s_at // Gga.6936.1.A1_at // GgaAffx.5541.1.S1_at // Gga.7254.2.S1_a_at // Gga.7797.1.S1_s_at // GgaAffx.21433.1.S1_s_at
GO:0009064	P	glutamine family amino acid metabolic process	7	456	96	24599	0.0022	0.01	// Gga.4425.1.S1_at // GgaAffx.20192.1.S1_s_at // GgaAffx.24934.1.S1_s_at // Gga.16450.1.S1_at // Gga.19278.1.S1_s_at // GgaAffx.25875.1.S1_s_at // Gga.4119.1.S1_at
GO:0000902	P	cell morphogenesis	17	456	413	24599	0.0024	0.011	// GgaAffx.22855.1.S1_at // GgaAffx.7407.1.S1_s_at // GgaAffx.26299.1.S1_s_at // Gga.12043.2.S1_a_at // GgaAffx.25037.1.S1_at // Gga.345.1.S1_at // GgaAffx.23564.2.S1_s_at // GgaAffx.12155.1.S1_s_at // Gga.3864.1.S1_at // Gga.12043.1.S1_at // GgaAffx.23641.3.S1_s_at // GgaAffx.24100.1.S1_s_at // GgaAffx.8655.1.S1_s_at // GgaAffx.25247.1.S1_at // GgaAffx.20978.1.S1_s_at // GgaAffx.1279.2.S1_s_at /…
GO:0006554	P	lysine catabolic process	5	456	51	24599	0.0026	0.012	// Gga.6085.3.S1_a_at // GgaAffx.22014.2.S1_s_at // GgaAffx.25875.1.S1_s_at // Gga.19278.1.S1_s_at // Gga.4119.1.S1_at
GO:0046903	P	secretion	15	456	348	24599	0.0027	0.012	// GgaAffx.9516.1.S1_at // Gga.3864.1.S1_at // GgaAffx.4984.1.S1_at // GgaAffx.23789.1.S1_at // GgaAffx.13099.1.S1_at // GgaAffx.20100.1.S1_at // GgaAffx.8115.3.S1_s_at // Gga.5263.3.S1_s_at // Gga.11950.1.S1_s_at // GgaAffx.1328.2.S1_s_at // GgaAffx.4006.1.S1_at // GgaAffx.4023.1.S1_at // GgaAffx.24709.1.S1_s_at // Gga.10758.1.S1_at // GgaAffx.4984.2.S1_s_at
GO:0006553	P	lysine metabolic process	5	456	52	24599	0.0028	0.012	// Gga.6085.3.S1_a_at // GgaAffx.22014.2.S1_s_at // GgaAffx.25875.1.S1_s_at // Gga.19278.1.S1_s_at // Gga.4119.1.S1_at
GO:0051098	P	regulation of binding	6	456	76	24599	0.003	0.013	// Gga.3864.1.S1_at // Gga.345.1.S1_at // GgaAffx.2639.1.S1_at // Gga.502.1.S1_at // GgaAffx.25648.2.S1_s_at // GgaAffx.2648.1.S1_s_at
GO:0015914	P	phospholipid transport	5	456	53	24599	0.0031	0.013	// GgaAffx.10968.1.S1_at // GgaAffx.1092.1.S1_s_at // Gga.18491.1.S1_s_at // GgaAffx.25789.4.S1_s_at // GgaAffx.10968.2.S1_s_at
GO:0030036	P	actin cytoskeleton organization	14	456	320	24599	0.0032	0.014	// GgaAffx.24513.9.S1_s_at // Gga.12255.1.S1_s_at // GgaAffx.23988.2.S1_s_at // GgaAffx.23564.2.S1_s_at // GgaAffx.5630.9.S1_s_at // GgaAffx.10417.7.S1_s_at // GgaAffx.25247.1.S1_at // GgaAffx.25609.2.S1_s_at // GgaAffx.25609.1.S1_at // GgaAffx.8655.1.S1_s_at // GgaAffx.23988.1.S1_at // GgaAffx.24513.7.S1_s_at // GgaAffx.8894.1.S1_at // Gga.637.1.S1_at
GO:0009820	P	alkaloid metabolic process	6	456	77	24599	0.0032	0.014	// GgaAffx.907.1.S1_at // Gga.14395.1.S1_s_at // Gga.4425.1.S1_at // Gga.51.1.S1_at // GgaAffx.6314.1.S1_s_at // GgaAffx.22036.3.S1_s_at
GO:0007605	P	sensory perception of sound	9	456	160	24599	0.0033	0.014	// GgaAffx.9310.1.S1_s_at // GgaAffx.25037.1.S1_at // GgaAffx.13099.1.S1_at // GgaAffx.1572.1.S1_at // GgaAffx.5008.1.S1_at // GgaAffx.4006.1.S1_at // GgaAffx.1279.2.S1_s_at // GgaAffx.8115.3.S1_s_at // Gga.637.1.S1_at
GO:0015672	P	monovalent inorganic cation transport	19	456	503	24599	0.0036	0.015	// GgaAffx.9310.1.S1_s_at // Gga.11487.1.S1_s_at // GgaAffx.9792.1.S1_at // GgaAffx.10239.1.A1_at // GgaAffx.2712.2.S1_s_at // GgaAffx.882.2.S1_s_at // Gga.11950.1.S1_s_at // GgaAffx.13099.1.S1_at // GgaAffx.10104.2.S1_s_at // GgaAffx.8115.3.S1_s_at // GgaAffx.10526.2.S1_s_at // Gga.267.1.S1_at // GgaAffx.10239.1.S1_at // Gga.4989.1.S1_s_at // GgaAffx.6107.1.S1_s_at // GgaAffx.4006.1.S1_at // Gga…
GO:0046164	P	alcohol catabolic process	8	456	134	24599	0.0039	0.016	// Gga.4909.2.S1_s_at // GgaAffx.24899.1.S1_at // GgaAffx.23840.1.S1_s_at // GgaAffx.6314.1.S1_s_at // Gga.19278.1.S1_s_at // GgaAffx.24899.1.S1_s_at // GgaAffx.25875.1.S1_s_at // Gga.4119.1.S1_at
GO:0016051	P	carbohydrate biosynthetic process	10	456	194	24599	0.0038	0.016	// GgaAffx.916.1.S1_at // Gga.4909.2.S1_s_at // GgaAffx.2648.1.S1_s_at // GgaAffx.10169.1.S1_at // Gga.19278.1.S1_s_at // GgaAffx.24553.1.S1_at // GgaAffx.9083.1.S1_at // GgaAffx.25875.1.S1_s_at // Gga.4119.1.S1_at // GgaAffx.711.1.A1_at
GO:0015749	P	monosaccharide transport	5	456	56	24599	0.0039	0.016	// Gga.267.1.S1_at // GgaAffx.1328.2.S1_s_at // Gga.1891.1.S1_at // GgaAffx.22340.1.S1_s_at // GgaAffx.10140.2.S1_s_at
GO:0007167	P	enzyme linked receptor protein signaling pathway	17	456	435	24599	0.0041	0.016	// Gga.9347.3.S1_a_at // GgaAffx.26299.1.S1_s_at // Gga.2304.1.S1_at // Gga.3864.1.S1_at // GgaAffx.23988.2.S1_s_at // GgaAffx.6526.1.S1_s_at // GgaAffx.23111.1.S1_s_at // GgaAffx.26684.1.S1_at // Gga.16450.1.S1_at // GgaAffx.6526.7.S1_s_at // GgaAffx.549.1.S1_at // GgaAffx.7522.1.S1_s_at // GgaAffx.20978.1.S1_s_at // Gga.10895.1.S1_s_at // GgaAffx.26288.1.S1_s_at // Gga.2908.1.S1_at // GgaAffx.5…
GO:0050954	P	sensory perception of mechanical stimulus	9	456	165	24599	0.0041	0.016	// GgaAffx.9310.1.S1_s_at // GgaAffx.25037.1.S1_at // GgaAffx.13099.1.S1_at // GgaAffx.1572.1.S1_at // GgaAffx.5008.1.S1_at // GgaAffx.4006.1.S1_at // GgaAffx.1279.2.S1_s_at // GgaAffx.8115.3.S1_s_at // Gga.637.1.S1_at
GO:0055067	P	monovalent inorganic cation homeostasis	5	456	57	24599	0.0042	0.017	// GgaAffx.13099.1.S1_at // Gga.5856.1.S1_at // GgaAffx.8115.3.S1_s_at // Gga.7556.1.S1_at // GgaAffx.198.1.S1_at
GO:0009101	P	glycoprotein biosynthetic process	10	456	197	24599	0.0043	0.017	// GgaAffx.916.1.S1_at // Gga.16371.1.S1_s_at // Gga.10147.1.S1_at // Gga.3864.1.S1_at // GgaAffx.10169.1.S1_at // GgaAffx.23315.1.S1_s_at // Gga.4485.2.S1_s_at // GgaAffx.24553.1.S1_at // Gga.9700.2.S1_a_at // GgaAffx.711.1.A1_at
GO:0060429	P	epithelium development	10	456	199	24599	0.0046	0.018	// GgaAffx.7407.1.S1_s_at // GgaAffx.5951.1.S1_s_at // GgaAffx.24000.1.S1_s_at // GgaAffx.25609.2.S1_s_at // GgaAffx.25609.1.S1_at // Gga.345.1.S1_at // GgaAffx.24000.2.S1_s_at // Gga.1891.1.S1_at // GgaAffx.20978.1.S1_s_at // Gga.2908.1.S1_at
GO:0006023	P	aminoglycan biosynthetic process	5	456	60	24599	0.0052	0.02	// GgaAffx.916.1.S1_at // GgaAffx.10169.1.S1_at // GgaAffx.9083.1.S1_at // GgaAffx.24553.1.S1_at // GgaAffx.711.1.A1_at
GO:0006024	P	glycosaminoglycan biosynthetic process	5	456	60	24599	0.0052	0.02	// GgaAffx.916.1.S1_at // GgaAffx.10169.1.S1_at // GgaAffx.9083.1.S1_at // GgaAffx.24553.1.S1_at // GgaAffx.711.1.A1_at
GO:0032880	P	regulation of protein localization	5	456	60	24599	0.0052	0.02	// GgaAffx.25609.1.S1_at // Gga.345.1.S1_at // GgaAffx.2648.1.S1_s_at // GgaAffx.25609.2.S1_s_at // Gga.637.1.S1_at
GO:0051101	P	regulation of DNA binding	5	456	60	24599	0.0052	0.02	// Gga.345.1.S1_at // GgaAffx.25648.2.S1_s_at // GgaAffx.2639.1.S1_at // Gga.502.1.S1_at // GgaAffx.2648.1.S1_s_at
GO:0007169	P	transmembrane receptor protein tyrosine kinase signaling pathway	12	456	270	24599	0.0054	0.02	// Gga.9347.3.S1_a_at // GgaAffx.26299.1.S1_s_at // Gga.2304.1.S1_at // Gga.3864.1.S1_at // GgaAffx.23988.2.S1_s_at // GgaAffx.6526.1.S1_s_at // GgaAffx.26684.1.S1_at // Gga.16450.1.S1_at // GgaAffx.6526.7.S1_s_at // GgaAffx.20978.1.S1_s_at // Gga.10895.1.S1_s_at // Gga.2908.1.S1_at
GO:0006464	P	protein modification process	53	456	1933	24599	0.0056	0.021	// GgaAffx.6023.1.S1_at // GgaAffx.23641.3.S1_s_at // GgaAffx.4590.1.S1_at // GgaAffx.21140.1.S1_s_at // GgaAffx.20192.1.S1_s_at // Gga.63.1.S1_s_at // GgaAffx.20285.1.S1_s_at // GgaAffx.26299.1.S1_s_at // GgaAffx.24503.1.S1_s_at // GgaAffx.1528.1.S1_at // GgaAffx.2648.1.S1_s_at // Gga.9700.2.S1_a_at // GgaAffx.21433.1.S1_s_at // GgaAffx.3218.1.S1_s_at // Gga.14253.1.S1_at // Gga.18461.1.S1_s_at …
GO:0055086	P	nucleobase, nucleoside and nucleotide metabolic process	19	456	528	24599	0.006	0.022	// GgaAffx.907.1.S1_at // GgaAffx.9422.2.S1_s_at // GgaAffx.21393.1.S1_s_at // GgaAffx.1852.2.S1_s_at // Gga.7320.1.S1_s_at // GgaAffx.26777.1.S1_s_at // Gga.14395.1.S1_s_at // GgaAffx.25940.1.S1_at // GgaAffx.25677.1.S1_s_at // GgaAffx.9792.1.S1_at // GgaAffx.1241.1.S1_at // GgaAffx.10526.2.S1_s_at // GgaAffx.7522.1.S1_s_at // GgaAffx.22730.1.S1_at // GgaAffx.10104.2.S1_s_at // GgaAffx.9083.1.S1…
GO:0032989	P	cellular component morphogenesis	18	456	491	24599	0.0061	0.022	// GgaAffx.22855.1.S1_at // GgaAffx.7407.1.S1_s_at // GgaAffx.26299.1.S1_s_at // Gga.12043.2.S1_a_at // GgaAffx.25037.1.S1_at // Gga.345.1.S1_at // GgaAffx.23564.2.S1_s_at // GgaAffx.12155.1.S1_s_at // Gga.3864.1.S1_at // Gga.12043.1.S1_at // GgaAffx.23641.3.S1_s_at // Gga.4722.1.S1_s_at // GgaAffx.24100.1.S1_s_at // GgaAffx.8655.1.S1_s_at // GgaAffx.25247.1.S1_at // GgaAffx.20978.1.S1_s_at // Gg…
GO:0030031	P	cell projection assembly	6	456	88	24599	0.0062	0.023	// Gga.2967.1.S1_at // Gga.12255.1.S1_s_at // GgaAffx.25247.1.S1_at // GgaAffx.25609.2.S1_s_at // GgaAffx.25609.1.S1_at // Gga.637.1.S1_at
GO:0042398	P	cellular amino acid derivative biosynthetic process	6	456	90	24599	0.0069	0.025	// GgaAffx.9792.1.S1_at // GgaAffx.26483.1.S1_s_at // GgaAffx.24934.1.S1_s_at // GgaAffx.1241.1.S1_at // Gga.4425.1.S1_at // GgaAffx.12570.1.S1_s_at
GO:0050896	P	response to stimulus	67	456	2588	24599	0.0077	0.027	// Gga.9347.3.S1_a_at // GgaAffx.4590.1.S1_at // GgaAffx.23988.2.S1_s_at // GgaAffx.4249.1.S1_x_at // Gga.6936.1.A1_at // Gga.16450.1.S1_at // GgaAffx.6526.7.S1_s_at // GgaAffx.1528.1.S1_at // Gga.19278.1.S1_s_at // GgaAffx.4023.1.S1_at // GgaAffx.1279.2.S1_s_at // Gga.7556.1.S1_at // Gga.7797.1.S1_s_at // GgaAffx.21433.1.S1_s_at // GgaAffx.9516.1.S1_at // GgaAffx.26684.1.S1_at // GgaAffx.7493.1.…
GO:0010646	P	regulation of cell communication	31	456	1031	24599	0.0084	0.03	// Gga.9347.3.S1_a_at // GgaAffx.25545.1.S1_at // GgaAffx.23641.3.S1_s_at // Gga.51.1.S1_at // GgaAffx.10012.1.S1_at // Gga.5263.3.S1_s_at // Gga.6009.1.S1_s_at // GgaAffx.2639.1.S1_at // GgaAffx.4023.1.S1_at // GgaAffx.4150.2.S1_s_at // Gga.2908.1.S1_at // Gga.4722.1.S1_s_at // GgaAffx.22685.1.S1_at // GgaAffx.6799.1.S1_s_at // GgaAffx.1143.1.S1_s_at // GgaAffx.26684.1.S1_at // GgaAffx.21483.1.S…
GO:0006665	P	sphingolipid metabolic process	7	456	124	24599	0.0089	0.031	// GgaAffx.193.2.S1_s_at // GgaAffx.193.1.S1_at // GgaAffx.23361.1.S1_at // Gga.8411.3.S1_s_at // GgaAffx.24612.1.S1_at // Gga.7556.1.S1_at // GgaAffx.711.1.A1_at
GO:0042592	P	homeostatic process	22	456	670	24599	0.0092	0.032	// Gga.4909.2.S1_s_at // Gga.9347.3.S1_a_at // GgaAffx.26777.1.S1_s_at // GgaAffx.20192.1.S1_s_at // Gga.6936.1.A1_at // GgaAffx.4023.1.S1_at // Gga.5856.1.S1_at // Gga.7556.1.S1_at // GgaAffx.22855.1.S1_at // Gga.7320.1.S1_s_at // GgaAffx.13099.1.S1_at // GgaAffx.9516.1.S1_at // GgaAffx.8115.3.S1_s_at // GgaAffx.198.1.S1_at // GgaAffx.25183.1.S1_at // GgaAffx.9310.1.S1_s_at // GgaAffx.5951.1.S1_…
GO:0030030	P	cell projection organization	16	456	439	24599	0.0097	0.034	// GgaAffx.22855.1.S1_at // Gga.2967.1.S1_at // GgaAffx.26299.1.S1_s_at // GgaAffx.23641.3.S1_s_at // GgaAffx.25037.1.S1_at // Gga.345.1.S1_at // GgaAffx.12155.1.S1_s_at // Gga.3864.1.S1_at // Gga.12255.1.S1_s_at // GgaAffx.25247.1.S1_at // GgaAffx.25609.2.S1_s_at // GgaAffx.25609.1.S1_at // GgaAffx.24100.1.S1_s_at // GgaAffx.26684.1.S1_at // GgaAffx.1279.2.S1_s_at // Gga.637.1.S1_at
GO:0043412	P	macromolecule modification	53	456	1996	24599	0.0098	0.034	// GgaAffx.6023.1.S1_at // GgaAffx.23641.3.S1_s_at // GgaAffx.4590.1.S1_at // GgaAffx.21140.1.S1_s_at // GgaAffx.20192.1.S1_s_at // Gga.63.1.S1_s_at // GgaAffx.20285.1.S1_s_at // GgaAffx.26299.1.S1_s_at // GgaAffx.24503.1.S1_s_at // GgaAffx.1528.1.S1_at // GgaAffx.2648.1.S1_s_at // Gga.9700.2.S1_a_at // GgaAffx.21433.1.S1_s_at // GgaAffx.3218.1.S1_s_at // Gga.14253.1.S1_at // Gga.18461.1.S1_s_at …
GO:0006753	P	nucleoside phosphate metabolic process	15	456	404	24599	0.01	0.035	// GgaAffx.907.1.S1_at // GgaAffx.9422.2.S1_s_at // GgaAffx.21393.1.S1_s_at // GgaAffx.8298.1.S1_at // GgaAffx.1852.2.S1_s_at // Gga.14395.1.S1_s_at // GgaAffx.25677.1.S1_s_at // GgaAffx.10104.2.S1_s_at // GgaAffx.1241.1.S1_at // GgaAffx.10526.2.S1_s_at // GgaAffx.7522.1.S1_s_at // GgaAffx.22730.1.S1_at // GgaAffx.9083.1.S1_at // GgaAffx.6314.1.S1_s_at // GgaAffx.22036.3.S1_s_at
GO:0009117	P	nucleotide metabolic process	15	456	404	24599	0.01	0.035	// GgaAffx.907.1.S1_at // GgaAffx.9422.2.S1_s_at // GgaAffx.21393.1.S1_s_at // GgaAffx.8298.1.S1_at // GgaAffx.1852.2.S1_s_at // Gga.14395.1.S1_s_at // GgaAffx.25677.1.S1_s_at // GgaAffx.10104.2.S1_s_at // GgaAffx.1241.1.S1_at // GgaAffx.10526.2.S1_s_at // GgaAffx.7522.1.S1_s_at // GgaAffx.22730.1.S1_at // GgaAffx.9083.1.S1_at // GgaAffx.6314.1.S1_s_at // GgaAffx.22036.3.S1_s_at
GO:0050801	P	ion homeostasis	15	456	405	24599	0.01	0.035	// GgaAffx.22855.1.S1_at // Gga.9347.3.S1_a_at // GgaAffx.9516.1.S1_at // GgaAffx.4023.1.S1_at // Gga.4909.2.S1_s_at // GgaAffx.13099.1.S1_at // GgaAffx.8115.3.S1_s_at // Gga.3864.1.S1_at // GgaAffx.24934.1.S1_s_at // GgaAffx.24196.1.S1_s_at // GgaAffx.4006.1.S1_at // GgaAffx.198.1.S1_at // Gga.5856.1.S1_at // Gga.7556.1.S1_at // Gga.3286.1.S1_at
GO:0006605	P	protein targeting	11	456	260	24599	0.011	0.035	// GgaAffx.2648.1.S1_s_at // Gga.16527.1.S1_at // GgaAffx.25679.1.S1_s_at // GgaAffx.26038.1.S1_at // Gga.345.1.S1_at // Gga.2044.3.S1_a_at // Gga.6118.1.S1_at // Gga.11343.1.S1_at // Gga.10758.1.S1_at // GgaAffx.25648.2.S1_s_at // GgaAffx.8944.1.S1_s_at
GO:0006821	P	chloride transport	6	456	99	24599	0.011	0.036	// GgaAffx.9310.1.S1_s_at // GgaAffx.25037.1.S1_at // GgaAffx.4984.1.S1_at // GgaAffx.9798.1.S1_at // GgaAffx.5008.1.S1_at // GgaAffx.4984.2.S1_s_at
GO:0016567	P	protein ubiquitination	9	456	194	24599	0.011	0.037	// GgaAffx.6430.1.S1_at // GgaAffx.25682.1.S1_s_at // GgaAffx.24941.1.S1_at // Gga.63.1.S1_s_at // GgaAffx.21089.1.S1_s_at // Gga.10623.1.S1_s_at // GgaAffx.24934.1.S1_s_at // GgaAffx.24941.1.S1_s_at // Gga.2908.1.S1_at
GO:0005976	P	polysaccharide metabolic process	9	456	194	24599	0.011	0.037	// GgaAffx.916.1.S1_at // Gga.7556.1.S1_at // GgaAffx.10169.1.S1_at // Gga.8411.3.S1_s_at // GgaAffx.24612.1.S1_at // GgaAffx.24553.1.S1_at // GgaAffx.9083.1.S1_at // GgaAffx.22340.1.S1_s_at // GgaAffx.711.1.A1_at
GO:0034754	P	cellular hormone metabolic process	6	456	101	24599	0.012	0.038	// GgaAffx.23840.1.S1_s_at // Gga.345.1.S1_at // Gga.8293.1.S1_at // Gga.18930.2.S1_a_at // GgaAffx.1474.1.S1_at // Gga.4119.1.S1_at
GO:0009063	P	cellular amino acid catabolic process	7	456	131	24599	0.012	0.038	// Gga.4425.1.S1_at // Gga.6085.3.S1_a_at // Gga.16450.1.S1_at // GgaAffx.22014.2.S1_s_at // Gga.19278.1.S1_s_at // GgaAffx.25875.1.S1_s_at // Gga.4119.1.S1_at
GO:0006643	P	membrane lipid metabolic process	7	456	132	24599	0.012	0.04	// GgaAffx.193.2.S1_s_at // GgaAffx.193.1.S1_at // GgaAffx.23361.1.S1_at // Gga.8411.3.S1_s_at // GgaAffx.24612.1.S1_at // Gga.7556.1.S1_at // GgaAffx.711.1.A1_at
GO:0046486	P	glycerolipid metabolic process	12	456	303	24599	0.013	0.04	// GgaAffx.24924.1.S1_at // GgaAffx.26610.2.S1_s_at // GgaAffx.20100.1.S1_at // GgaAffx.7526.1.S1_at // GgaAffx.12570.1.S1_s_at // Gga.5922.2.S1_a_at // GgaAffx.7131.1.S1_at // Gga.19278.1.S1_s_at // GgaAffx.24612.1.S1_at // GgaAffx.25875.1.S1_s_at // Gga.4119.1.S1_at // GgaAffx.23494.1.S1_s_at
GO:0009100	P	glycoprotein metabolic process	10	456	232	24599	0.013	0.04	// GgaAffx.916.1.S1_at // Gga.16371.1.S1_s_at // Gga.10147.1.S1_at // Gga.3864.1.S1_at // GgaAffx.10169.1.S1_at // GgaAffx.23315.1.S1_s_at // Gga.4485.2.S1_s_at // GgaAffx.24553.1.S1_at // Gga.9700.2.S1_a_at // GgaAffx.711.1.A1_at
GO:0006568	P	tryptophan metabolic process	5	456	75	24599	0.013	0.042	// Gga.4425.1.S1_at // GgaAffx.22014.2.S1_s_at // GgaAffx.25875.1.S1_s_at // Gga.19278.1.S1_s_at // Gga.4119.1.S1_at
GO:0032446	P	protein modification by small protein conjugation	9	456	200	24599	0.014	0.043	// GgaAffx.6430.1.S1_at // GgaAffx.25682.1.S1_s_at // GgaAffx.24941.1.S1_at // Gga.63.1.S1_s_at // GgaAffx.21089.1.S1_s_at // Gga.10623.1.S1_s_at // GgaAffx.24934.1.S1_s_at // GgaAffx.24941.1.S1_s_at // Gga.2908.1.S1_at
GO:0045454	P	cell redox homeostasis	5	456	76	24599	0.014	0.044	// GgaAffx.20192.1.S1_s_at // Gga.4909.2.S1_s_at // GgaAffx.24934.1.S1_s_at // Gga.7320.1.S1_s_at // GgaAffx.26777.1.S1_s_at
GO:0006090	P	pyruvate metabolic process	6	456	108	24599	0.016	0.05	// Gga.4909.2.S1_s_at // GgaAffx.25875.1.S1_s_at // Gga.1132.1.S1_at // Gga.19278.1.S1_s_at // GgaAffx.2648.1.S1_s_at // Gga.4119.1.S1_at
GO:0021915	P	neural tube development	5	456	79	24599	0.016	0.05	// GgaAffx.25609.1.S1_at // Gga.345.1.S1_at // GgaAffx.25609.2.S1_s_at // Gga.3864.1.S1_at // GgaAffx.10949.1.S1_s_at
GO:0006869	P	lipid transport	7	456	140	24599	0.016	0.051	// GgaAffx.10968.1.S1_at // GgaAffx.1092.1.S1_s_at // Gga.4425.1.S1_at // Gga.4006.2.S1_a_at // Gga.18491.1.S1_s_at // GgaAffx.25789.4.S1_s_at // GgaAffx.10968.2.S1_s_at
GO:0018193	P	peptidyl-amino acid modification	7	456	143	24599	0.018	0.056	// Gga.16371.1.S1_s_at // GgaAffx.20192.1.S1_s_at // Gga.2908.1.S1_at // Gga.4485.2.S1_s_at // GgaAffx.2648.1.S1_s_at // GgaAffx.7758.2.S1_s_at // GgaAffx.9403.1.S1_s_at
GO:0051716	P	cellular response to stimulus	19	456	595	24599	0.019	0.057	// Gga.2475.1.S1_at // GgaAffx.7493.1.S1_s_at // Gga.3864.1.S1_at // GgaAffx.26777.1.S1_s_at // GgaAffx.6526.1.S1_s_at // GgaAffx.23988.2.S1_s_at // Gga.7212.1.S1_at // GgaAffx.22014.2.S1_s_at // Gga.4119.1.S1_at // GgaAffx.26684.1.S1_at // GgaAffx.318.1.S1_at // GgaAffx.6526.7.S1_s_at // Gga.2087.1.S1_s_at // Gga.19278.1.S1_s_at // GgaAffx.21825.1.S1_s_at // GgaAffx.25875.1.S1_s_at // Gga.7797.1…
GO:0010038	P	response to metal ion	5	456	82	24599	0.019	0.057	// GgaAffx.21825.1.S1_s_at // Gga.63.1.S1_s_at // Gga.4989.1.S1_s_at // GgaAffx.25682.1.S1_s_at // GgaAffx.21393.1.S1_s_at
GO:0009987	P	cellular process	280	456	12876	24599	0.019	0.057	// GgaAffx.23641.3.S1_s_at // GgaAffx.25037.1.S1_at // Gga.16527.1.S1_at // Gga.1132.1.S1_at // GgaAffx.20192.1.S1_s_at // GgaAffx.9629.1.S1_at // GgaAffx.23988.1.S1_at // GgaAffx.1528.1.S1_at // Gga.19278.1.S1_s_at // GgaAffx.25618.1.S1_at // Gga.8312.3.S1_at // GgaAffx.1279.2.S1_s_at // Gga.7797.1.S1_s_at // Gga.5522.2.S1_a_at // GgaAffx.5095.1.S1_at // GgaAffx.9403.1.S1_s_at // GgaAffx.25609.1…
GO:0008643	P	carbohydrate transport	5	456	83	24599	0.02	0.058	// Gga.267.1.S1_at // GgaAffx.1328.2.S1_s_at // Gga.1891.1.S1_at // GgaAffx.22340.1.S1_s_at // GgaAffx.10140.2.S1_s_at
GO:0043413	P	macromolecule glycosylation	7	456	145	24599	0.02	0.058	// Gga.3864.1.S1_at // Gga.10147.1.S1_at // GgaAffx.23315.1.S1_s_at // Gga.4485.2.S1_s_at // GgaAffx.711.1.A1_at // Gga.9700.2.S1_a_at // Gga.16371.1.S1_s_at
GO:0006486	P	protein amino acid glycosylation	7	456	145	24599	0.02	0.058	// Gga.3864.1.S1_at // Gga.10147.1.S1_at // GgaAffx.23315.1.S1_s_at // Gga.4485.2.S1_s_at // GgaAffx.711.1.A1_at // Gga.9700.2.S1_a_at // Gga.16371.1.S1_s_at
GO:0070085	P	glycosylation	7	456	145	24599	0.02	0.058	// Gga.3864.1.S1_at // Gga.10147.1.S1_at // GgaAffx.23315.1.S1_s_at // Gga.4485.2.S1_s_at // GgaAffx.711.1.A1_at // Gga.9700.2.S1_a_at // Gga.16371.1.S1_s_at
GO:0016310	P	phosphorylation	35	456	1285	24599	0.021	0.061	// GgaAffx.6023.1.S1_at // Gga.9347.3.S1_a_at // GgaAffx.23641.3.S1_s_at // GgaAffx.4590.1.S1_at // Gga.4909.2.S1_s_at // GgaAffx.13099.1.S1_at // GgaAffx.26299.1.S1_s_at // Gga.11674.1.S1_at // GgaAffx.24503.1.S1_s_at // GgaAffx.1528.1.S1_at // Gga.2908.1.S1_at // GgaAffx.22685.1.S1_at // GgaAffx.21433.1.S1_s_at // GgaAffx.26684.1.S1_at // Gga.4989.1.S1_s_at // GgaAffx.549.1.S1_at // GgaAffx.101…
GO:0009141	P	nucleoside triphosphate metabolic process	6	456	115	24599	0.021	0.061	// GgaAffx.21393.1.S1_s_at // GgaAffx.1852.2.S1_s_at // GgaAffx.25677.1.S1_s_at // GgaAffx.10526.2.S1_s_at // GgaAffx.7522.1.S1_s_at // GgaAffx.10104.2.S1_s_at
GO:0044238	P	primary metabolic process	175	456	7849	24599	0.021	0.061	// GgaAffx.23641.3.S1_s_at // GgaAffx.26777.1.S1_s_at // GgaAffx.20192.1.S1_s_at // GgaAffx.1528.1.S1_at // Gga.19278.1.S1_s_at // Gga.8312.3.S1_at // Gga.7797.1.S1_s_at // Gga.2908.1.S1_at // GgaAffx.5095.1.S1_at // GgaAffx.9403.1.S1_s_at // GgaAffx.681.3.S1_s_at // Gga.7320.1.S1_s_at // GgaAffx.24000.1.S1_s_at // GgaAffx.7526.1.S1_at // Gga.8293.1.S1_at // Gga.5922.2.S1_a_at // GgaAffx.22014.2.…
GO:0043687	P	post-translational protein modification	42	456	1606	24599	0.023	0.065	// GgaAffx.6023.1.S1_at // GgaAffx.23641.3.S1_s_at // GgaAffx.4590.1.S1_at // GgaAffx.24941.1.S1_at // Gga.63.1.S1_s_at // GgaAffx.20285.1.S1_s_at // GgaAffx.26299.1.S1_s_at // GgaAffx.24503.1.S1_s_at // GgaAffx.1528.1.S1_at // GgaAffx.21433.1.S1_s_at // GgaAffx.3218.1.S1_s_at // Gga.14253.1.S1_at // Gga.18461.1.S1_s_at // GgaAffx.681.3.S1_s_at // GgaAffx.24000.1.S1_s_at // GgaAffx.21089.1.S1_s_a…
GO:0009725	P	response to hormone stimulus	9	456	219	24599	0.023	0.065	// GgaAffx.23988.2.S1_s_at // GgaAffx.6526.1.S1_s_at // Gga.1132.1.S1_at // GgaAffx.24934.1.S1_s_at // Gga.4223.1.S1_at // GgaAffx.6526.7.S1_s_at // GgaAffx.5541.1.S1_at // Gga.51.1.S1_at // GgaAffx.21825.1.S1_s_at
GO:0006094	P	gluconeogenesis	5	456	87	24599	0.024	0.067	// Gga.4909.2.S1_s_at // GgaAffx.2648.1.S1_s_at // Gga.19278.1.S1_s_at // Gga.4119.1.S1_at // GgaAffx.25875.1.S1_s_at
GO:0050890	P	cognition	18	456	572	24599	0.024	0.069	// GgaAffx.9310.1.S1_s_at // GgaAffx.26299.1.S1_s_at // GgaAffx.7131.1.S1_at // Gga.12745.1.S1_at // GgaAffx.25037.1.S1_at // GgaAffx.13099.1.S1_at // GgaAffx.1572.1.S1_at // Gga.3864.1.S1_at // GgaAffx.5008.1.S1_at // Gga.16450.1.S1_at // Gga.18756.1.S1_s_at // GgaAffx.4006.1.S1_at // Gga.51.1.S1_at // GgaAffx.21825.1.S1_s_at // GgaAffx.1279.2.S1_s_at // Gga.7556.1.S1_at // GgaAffx.8115.3.S1_s_a…
GO:0019319	P	hexose biosynthetic process	5	456	89	24599	0.026	0.071	// Gga.4909.2.S1_s_at // GgaAffx.2648.1.S1_s_at // Gga.19278.1.S1_s_at // Gga.4119.1.S1_at // GgaAffx.25875.1.S1_s_at
GO:0048609	P	reproductive process in a multicellular organism	5	456	89	24599	0.026	0.071	// Gga.4909.2.S1_s_at // GgaAffx.4249.1.S1_x_at // GgaAffx.1433.3.S1_s_at // Gga.7320.1.S1_s_at // GgaAffx.26777.1.S1_s_at
GO:0032504	P	multicellular organism reproduction	5	456	89	24599	0.026	0.071	// Gga.4909.2.S1_s_at // GgaAffx.4249.1.S1_x_at // GgaAffx.1433.3.S1_s_at // Gga.7320.1.S1_s_at // GgaAffx.26777.1.S1_s_at
GO:0001503	P	ossification	6	456	124	24599	0.029	0.079	// GgaAffx.13099.1.S1_at // GgaAffx.8115.3.S1_s_at // GgaAffx.9422.2.S1_s_at // Gga.345.1.S1_at // GgaAffx.20978.1.S1_s_at // GgaAffx.5095.1.S1_at
GO:0060348	P	bone development	6	456	124	24599	0.029	0.079	// GgaAffx.13099.1.S1_at // GgaAffx.8115.3.S1_s_at // GgaAffx.9422.2.S1_s_at // Gga.345.1.S1_at // GgaAffx.20978.1.S1_s_at // GgaAffx.5095.1.S1_at
GO:0000271	P	polysaccharide biosynthetic process	5	456	92	24599	0.029	0.079	// GgaAffx.916.1.S1_at // GgaAffx.10169.1.S1_at // GgaAffx.9083.1.S1_at // GgaAffx.24553.1.S1_at // GgaAffx.711.1.A1_at
GO:0031399	P	regulation of protein modification process	6	456	125	24599	0.03	0.082	// Gga.3864.1.S1_at // GgaAffx.24934.1.S1_s_at // GgaAffx.10350.1.S1_at // GgaAffx.26684.1.S1_at // GgaAffx.2648.1.S1_s_at // Gga.2908.1.S1_at
GO:0046364	P	monosaccharide biosynthetic process	5	456	93	24599	0.03	0.082	// Gga.4909.2.S1_s_at // GgaAffx.2648.1.S1_s_at // Gga.19278.1.S1_s_at // Gga.4119.1.S1_at // GgaAffx.25875.1.S1_s_at
GO:0019725	P	cellular homeostasis	15	456	465	24599	0.031	0.083	// GgaAffx.22855.1.S1_at // Gga.9347.3.S1_a_at // Gga.4909.2.S1_s_at // Gga.3864.1.S1_at // Gga.7320.1.S1_s_at // GgaAffx.26777.1.S1_s_at // GgaAffx.20192.1.S1_s_at // GgaAffx.24934.1.S1_s_at // GgaAffx.9516.1.S1_at // GgaAffx.9310.1.S1_s_at // GgaAffx.4006.1.S1_at // GgaAffx.4023.1.S1_at // GgaAffx.24196.1.S1_s_at // Gga.7556.1.S1_at // Gga.3286.1.S1_at
GO:0009719	P	response to endogenous stimulus	9	456	232	24599	0.031	0.084	// GgaAffx.23988.2.S1_s_at // GgaAffx.6526.1.S1_s_at // Gga.1132.1.S1_at // GgaAffx.24934.1.S1_s_at // Gga.4223.1.S1_at // GgaAffx.6526.7.S1_s_at // GgaAffx.5541.1.S1_at // Gga.51.1.S1_at // GgaAffx.21825.1.S1_s_at
GO:0001932	P	regulation of protein amino acid phosphorylation	5	456	95	24599	0.033	0.087	// GgaAffx.26684.1.S1_at // GgaAffx.2648.1.S1_s_at // Gga.2908.1.S1_at // GgaAffx.10350.1.S1_at // Gga.3864.1.S1_at
GO:0051649	P	establishment of localization in cell	27	456	982	24599	0.034	0.089	// Gga.16527.1.S1_at // Gga.5263.3.S1_s_at // GgaAffx.26038.1.S1_at // GgaAffx.4023.1.S1_at // Gga.5522.2.S1_a_at // GgaAffx.9516.1.S1_at // GgaAffx.21393.1.S1_s_at // Gga.345.1.S1_at // GgaAffx.20100.1.S1_at // Gga.6118.1.S1_at // GgaAffx.2648.1.S1_s_at // GgaAffx.23789.1.S1_at // GgaAffx.25679.1.S1_s_at // GgaAffx.1328.2.S1_s_at // Gga.2044.3.S1_a_at // GgaAffx.1279.2.S1_s_at // GgaAffx.25648.2…
GO:0048878	P	chemical homeostasis	15	456	471	24599	0.034	0.089	// GgaAffx.22855.1.S1_at // Gga.9347.3.S1_a_at // GgaAffx.9516.1.S1_at // GgaAffx.4023.1.S1_at // Gga.4909.2.S1_s_at // GgaAffx.13099.1.S1_at // GgaAffx.8115.3.S1_s_at // Gga.3864.1.S1_at // GgaAffx.24934.1.S1_s_at // GgaAffx.24196.1.S1_s_at // GgaAffx.4006.1.S1_at // GgaAffx.198.1.S1_at // Gga.5856.1.S1_at // Gga.7556.1.S1_at // Gga.3286.1.S1_at
GO:0016052	P	carbohydrate catabolic process	7	456	164	24599	0.035	0.091	// Gga.4909.2.S1_s_at // GgaAffx.6314.1.S1_s_at // Gga.8411.3.S1_s_at // Gga.19278.1.S1_s_at // GgaAffx.24612.1.S1_at // GgaAffx.25875.1.S1_s_at // Gga.4119.1.S1_at
GO:0009952	P	anterior/posterior pattern formation	6	456	130	24599	0.036	0.092	// Gga.3864.1.S1_at // GgaAffx.25545.1.S1_at // GgaAffx.25609.2.S1_s_at // GgaAffx.25609.1.S1_at // Gga.345.1.S1_at // GgaAffx.10949.1.S1_s_at
GO:0009069	P	serine family amino acid metabolic process	17	456	557	24599	0.036	0.092	// Gga.19274.1.S1_s_at // Gga.4909.2.S1_s_at // GgaAffx.26483.1.S1_s_at // GgaAffx.23641.3.S1_s_at // GgaAffx.4590.1.S1_at // GgaAffx.542.1.S1_at // GgaAffx.23564.2.S1_s_at // GgaAffx.24934.1.S1_s_at // GgaAffx.10350.1.S1_at // GgaAffx.1528.1.S1_at // Gga.4425.1.S1_at // Gga.2087.1.S1_s_at // GgaAffx.549.1.S1_at // GgaAffx.26684.1.S1_at // GgaAffx.26288.1.S1_s_at // GgaAffx.21433.1.S1_s_at // Gga…
GO:0007156	P	homophilic cell adhesion	6	456	130	24599	0.036	0.092	// GgaAffx.9793.1.S1_at // Gga.10479.1.S1_s_at // Gga.11150.1.S1_s_at // GgaAffx.2055.1.S1_s_at // GgaAffx.1143.1.S1_s_at // GgaAffx.8655.1.S1_s_at
GO:0055080	P	cation homeostasis	10	456	276	24599	0.036	0.092	// GgaAffx.9516.1.S1_at // Gga.9347.3.S1_a_at // Gga.3864.1.S1_at // GgaAffx.13099.1.S1_at // GgaAffx.8115.3.S1_s_at // GgaAffx.24196.1.S1_s_at // GgaAffx.198.1.S1_at // Gga.5856.1.S1_at // Gga.7556.1.S1_at // Gga.3286.1.S1_at
GO:0000904	P	cell morphogenesis involved in differentiation	10	456	277	24599	0.037	0.094	// GgaAffx.22855.1.S1_at // GgaAffx.26299.1.S1_s_at // GgaAffx.23641.3.S1_s_at // GgaAffx.25037.1.S1_at // Gga.345.1.S1_at // GgaAffx.12155.1.S1_s_at // GgaAffx.24100.1.S1_s_at // GgaAffx.20978.1.S1_s_at // GgaAffx.1279.2.S1_s_at // Gga.3864.1.S1_at
GO:0007166	P	cell surface receptor linked signaling pathway	43	456	1712	24599	0.037	0.094	// Gga.2967.1.S1_at // Gga.9347.3.S1_a_at // Gga.4722.1.S1_s_at // GgaAffx.23988.2.S1_s_at // Gga.16450.1.S1_at // GgaAffx.6526.7.S1_s_at // GgaAffx.2639.1.S1_at // GgaAffx.3976.1.S1_at // GgaAffx.22707.1.S1_at // Gga.10895.1.S1_s_at // Gga.2908.1.S1_at // GgaAffx.9516.1.S1_at // GgaAffx.26684.1.S1_at // GgaAffx.23149.2.S1_s_at // GgaAffx.23149.1.S1_at // GgaAffx.26048.1.S1_at // Gga.4048.1.S1_at…
GO:0009653	P	anatomical structure morphogenesis	34	456	1305	24599	0.038	0.095	// Gga.2967.1.S1_at // Gga.4909.2.S1_s_at // GgaAffx.23641.3.S1_s_at // GgaAffx.25037.1.S1_at // GgaAffx.20531.1.S1_s_at // GgaAffx.25609.2.S1_s_at // GgaAffx.22594.1.S1_s_at // GgaAffx.10949.1.S1_s_at // Gga.2908.1.S1_at // GgaAffx.5095.1.S1_at // Gga.4722.1.S1_s_at // GgaAffx.22855.1.S1_at // Gga.345.1.S1_at // GgaAffx.12155.1.S1_s_at // GgaAffx.25247.1.S1_at // GgaAffx.25609.1.S1_at // GgaAffx…
GO:0008104	P	protein localization	26	456	953	24599	0.039	0.098	// GgaAffx.25037.1.S1_at // Gga.16527.1.S1_at // GgaAffx.26038.1.S1_at // GgaAffx.25609.2.S1_s_at // GgaAffx.10564.2.S1_s_at // GgaAffx.9516.1.S1_at // Gga.11343.1.S1_at // GgaAffx.25609.1.S1_at // Gga.345.1.S1_at // Gga.6118.1.S1_at // GgaAffx.2648.1.S1_s_at // GgaAffx.23789.1.S1_at // GgaAffx.25679.1.S1_s_at // GgaAffx.1328.2.S1_s_at // Gga.2044.3.S1_a_at // Gga.11662.1.S1_at // GgaAffx.198.1.S…
GO:0007369	P	gastrulation	5	456	100	24599	0.04	0.098	// GgaAffx.25609.1.S1_at // Gga.4909.2.S1_s_at // Gga.1891.1.S1_at // GgaAffx.20978.1.S1_s_at // GgaAffx.25609.2.S1_s_at
GO:0009072	P	aromatic amino acid family metabolic process	9	456	242	24599	0.039	0.098	// GgaAffx.681.3.S1_s_at // GgaAffx.21140.1.S1_s_at // GgaAffx.23111.1.S1_s_at // GgaAffx.24127.1.S1_at // Gga.4425.1.S1_at // GgaAffx.22014.2.S1_s_at // Gga.19278.1.S1_s_at // GgaAffx.25875.1.S1_s_at // Gga.4119.1.S1_at
GO:0070647	P	protein modification by small protein conjugation or removal	10	456	283	24599	0.042	0.1	// GgaAffx.6430.1.S1_at // GgaAffx.25682.1.S1_s_at // GgaAffx.24941.1.S1_at // Gga.63.1.S1_s_at // GgaAffx.21089.1.S1_s_at // Gga.10623.1.S1_s_at // GgaAffx.24934.1.S1_s_at // GgaAffx.20285.1.S1_s_at // GgaAffx.24941.1.S1_s_at // Gga.2908.1.S1_at
GO:0002009	P	morphogenesis of an epithelium	6	456	136	24599	0.043	0.1	// GgaAffx.25609.2.S1_s_at // GgaAffx.25609.1.S1_at // Gga.345.1.S1_at // Gga.1891.1.S1_at // GgaAffx.20978.1.S1_s_at // Gga.2908.1.S1_at
GO:0046165	P	alcohol biosynthetic process	5	456	103	24599	0.044	0.11	// Gga.4909.2.S1_s_at // GgaAffx.2648.1.S1_s_at // Gga.19278.1.S1_s_at // Gga.4119.1.S1_at // GgaAffx.25875.1.S1_s_at
GO:0009966	P	regulation of signal transduction	24	456	876	24599	0.044	0.11	// Gga.9347.3.S1_a_at // GgaAffx.25545.1.S1_at // GgaAffx.23641.3.S1_s_at // Gga.4722.1.S1_s_at // GgaAffx.10012.1.S1_at // Gga.5263.3.S1_s_at // Gga.6009.1.S1_s_at // GgaAffx.2639.1.S1_at // GgaAffx.4150.2.S1_s_at // Gga.2908.1.S1_at // GgaAffx.22685.1.S1_at // GgaAffx.6799.1.S1_s_at // GgaAffx.26684.1.S1_at // GgaAffx.21483.1.S1_at // GgaAffx.2648.1.S1_s_at // GgaAffx.10350.1.S1_at // Gga.8774.…
GO:0006766	P	vitamin metabolic process	7	456	174	24599	0.046	0.11	// GgaAffx.23840.1.S1_s_at // GgaAffx.25875.1.S1_s_at // GgaAffx.20100.1.S1_at // GgaAffx.24934.1.S1_s_at // Gga.19278.1.S1_s_at // Gga.11343.1.S1_at // Gga.4119.1.S1_at
GO:0032501	P	multicellular organismal process	87	456	3838	24599	0.049	0.12	// GgaAffx.23641.3.S1_s_at // GgaAffx.25037.1.S1_at // GgaAffx.26777.1.S1_s_at // Gga.19278.1.S1_s_at // Gga.2908.1.S1_at // GgaAffx.5095.1.S1_at // GgaAffx.25609.1.S1_at // Gga.7320.1.S1_s_at // GgaAffx.24000.1.S1_s_at // Gga.1742.1.S1_a_at // GgaAffx.24934.1.S1_s_at // GgaAffx.26299.1.S1_s_at // GgaAffx.5951.1.S1_s_at // Gga.2044.3.S1_a_at // GgaAffx.1474.1.S1_at // GgaAffx.22926.1.S1_at // Gga…
GO:0006007	P	glucose catabolic process	5	456	107	24599	0.05	0.12	// Gga.4909.2.S1_s_at // GgaAffx.25875.1.S1_s_at // Gga.19278.1.S1_s_at // Gga.4119.1.S1_at // GgaAffx.6314.1.S1_s_at
GO:0042493	P	response to drug	6	456	143	24599	0.052	0.12	// Gga.1910.1.S1_a_at // Gga.51.1.S1_at // GgaAffx.21825.1.S1_s_at // GgaAffx.26615.2.S1_s_at // GgaAffx.3622.2.S1_s_at // GgaAffx.25183.1.S1_at
GO:0032940	P	secretion by cell	10	456	295	24599	0.052	0.12	// GgaAffx.9516.1.S1_at // Gga.3864.1.S1_at // GgaAffx.23789.1.S1_at // GgaAffx.20100.1.S1_at // Gga.5263.3.S1_s_at // GgaAffx.1328.2.S1_s_at // GgaAffx.4006.1.S1_at // GgaAffx.4023.1.S1_at // GgaAffx.24709.1.S1_s_at // Gga.10758.1.S1_at
GO:0017038	P	protein import	6	456	143	24599	0.052	0.12	// Gga.16527.1.S1_at // GgaAffx.26038.1.S1_at // Gga.345.1.S1_at // Gga.2044.3.S1_a_at // GgaAffx.25648.2.S1_s_at // GgaAffx.2648.1.S1_s_at
GO:0016337	P	cell-cell adhesion	9	456	256	24599	0.053	0.12	// Gga.2967.1.S1_at // GgaAffx.2055.1.S1_s_at // Gga.3864.1.S1_at // Gga.10479.1.S1_s_at // Gga.11150.1.S1_s_at // GgaAffx.9793.1.S1_at // GgaAffx.2298.1.S1_at // GgaAffx.1143.1.S1_s_at // GgaAffx.8655.1.S1_s_at
GO:0051641	P	cellular localization	27	456	1029	24599	0.053	0.12	// Gga.16527.1.S1_at // Gga.5263.3.S1_s_at // GgaAffx.26038.1.S1_at // GgaAffx.4023.1.S1_at // Gga.5522.2.S1_a_at // GgaAffx.9516.1.S1_at // GgaAffx.21393.1.S1_s_at // Gga.345.1.S1_at // GgaAffx.20100.1.S1_at // Gga.6118.1.S1_at // GgaAffx.2648.1.S1_s_at // GgaAffx.23789.1.S1_at // GgaAffx.25679.1.S1_s_at // GgaAffx.1328.2.S1_s_at // Gga.2044.3.S1_a_at // GgaAffx.1279.2.S1_s_at // GgaAffx.25648.2…
GO:0048598	P	embryonic morphogenesis	11	456	338	24599	0.055	0.13	// Gga.4909.2.S1_s_at // GgaAffx.5951.1.S1_s_at // GgaAffx.25037.1.S1_at // GgaAffx.25609.2.S1_s_at // GgaAffx.25609.1.S1_at // Gga.345.1.S1_at // Gga.1891.1.S1_at // GgaAffx.20978.1.S1_s_at // GgaAffx.1279.2.S1_s_at // GgaAffx.5095.1.S1_at // Gga.3864.1.S1_at
GO:0006206	P	pyrimidine base metabolic process	5	456	110	24599	0.055	0.13	// GgaAffx.8298.1.S1_at // GgaAffx.25677.1.S1_s_at // GgaAffx.1852.2.S1_s_at // Gga.7320.1.S1_s_at // GgaAffx.26777.1.S1_s_at
GO:0006687	P	glycosphingolipid metabolic process	5	456	110	24599	0.055	0.13	// GgaAffx.23361.1.S1_at // Gga.8411.3.S1_s_at // GgaAffx.711.1.A1_at // Gga.7556.1.S1_at // GgaAffx.24612.1.S1_at
GO:0048667	P	cell morphogenesis involved in neuron differentiation	9	456	259	24599	0.056	0.13	// GgaAffx.22855.1.S1_at // GgaAffx.26299.1.S1_s_at // GgaAffx.23641.3.S1_s_at // Gga.3864.1.S1_at // Gga.345.1.S1_at // GgaAffx.12155.1.S1_s_at // GgaAffx.24100.1.S1_s_at // GgaAffx.1279.2.S1_s_at // GgaAffx.25037.1.S1_at
GO:0001505	P	regulation of neurotransmitter levels	5	456	111	24599	0.057	0.13	// GgaAffx.25875.1.S1_s_at // Gga.19278.1.S1_s_at // GgaAffx.24899.1.S1_at // GgaAffx.24899.1.S1_s_at // Gga.3864.1.S1_at
GO:0035239	P	tube morphogenesis	5	456	111	24599	0.057	0.13	// GgaAffx.25609.1.S1_at // GgaAffx.24100.1.S1_s_at // Gga.3864.1.S1_at // Gga.345.1.S1_at // GgaAffx.25609.2.S1_s_at
GO:0015837	P	amine transport	6	456	147	24599	0.058	0.13	// GgaAffx.2712.2.S1_s_at // Gga.3864.1.S1_at // Gga.18973.1.S1_at // GgaAffx.6107.1.S1_s_at // GgaAffx.21393.1.S1_s_at // Gga.11343.1.S1_at
GO:0003008	P	system process	32	456	1269	24599	0.059	0.13	// Gga.9347.3.S1_a_at // GgaAffx.25037.1.S1_at // GgaAffx.24899.1.S1_at // GgaAffx.13099.1.S1_at // GgaAffx.24934.1.S1_s_at // Gga.16450.1.S1_at // Gga.19278.1.S1_s_at // Gga.7556.1.S1_at // GgaAffx.1143.1.S1_s_at // Gga.18756.1.S1_s_at // GgaAffx.4984.2.S1_s_at // GgaAffx.26299.1.S1_s_at // Gga.12745.1.S1_at // GgaAffx.4984.1.S1_at // GgaAffx.8115.3.S1_s_at // GgaAffx.1474.1.S1_at // Gga.51.1.S1…
GO:0006767	P	water-soluble vitamin metabolic process	6	456	148	24599	0.06	0.13	// GgaAffx.25875.1.S1_s_at // GgaAffx.20100.1.S1_at // GgaAffx.24934.1.S1_s_at // Gga.19278.1.S1_s_at // Gga.11343.1.S1_at // Gga.4119.1.S1_at
GO:0006813	P	potassium ion transport	8	456	224	24599	0.06	0.13	// GgaAffx.9310.1.S1_s_at // GgaAffx.9792.1.S1_at // GgaAffx.10239.1.A1_at // Gga.11950.1.S1_s_at // Gga.11487.1.S1_s_at // GgaAffx.10239.1.S1_at // GgaAffx.4006.1.S1_at // GgaAffx.4023.1.S1_at
GO:0007243	P	protein kinase cascade	13	456	427	24599	0.06	0.13	// Gga.3864.1.S1_at // GgaAffx.23028.1.S1_s_at // Gga.8774.1.S1_s_at // GgaAffx.6400.2.S1_s_at // GgaAffx.10350.1.S1_at // GgaAffx.26684.1.S1_at // GgaAffx.549.1.S1_at // GgaAffx.5993.1.S1_at // Gga.502.1.S1_at // GgaAffx.2648.1.S1_s_at // Gga.2908.1.S1_at // GgaAffx.8944.1.S1_s_at // GgaAffx.22685.1.S1_at
GO:0007015	P	actin filament organization	6	456	149	24599	0.061	0.14	// Gga.12255.1.S1_s_at // GgaAffx.5630.9.S1_s_at // GgaAffx.23988.2.S1_s_at // GgaAffx.8655.1.S1_s_at // GgaAffx.23988.1.S1_at // Gga.637.1.S1_at
GO:0007507	P	heart development	8	456	225	24599	0.062	0.14	// GgaAffx.5951.1.S1_s_at // Gga.3864.1.S1_at // GgaAffx.5618.1.S1_at // GgaAffx.10012.1.S1_at // GgaAffx.25609.2.S1_s_at // GgaAffx.25609.1.S1_at // Gga.345.1.S1_at // GgaAffx.20978.1.S1_s_at
GO:0042692	P	muscle cell differentiation	5	456	114	24599	0.063	0.14	// GgaAffx.26684.1.S1_at // Gga.345.1.S1_at // GgaAffx.10012.1.S1_at // GgaAffx.25677.1.S1_s_at // GgaAffx.1852.2.S1_s_at
GO:0019320	P	hexose catabolic process	5	456	114	24599	0.063	0.14	// Gga.4909.2.S1_s_at // GgaAffx.25875.1.S1_s_at // Gga.19278.1.S1_s_at // Gga.4119.1.S1_at // GgaAffx.6314.1.S1_s_at
GO:0006865	P	amino acid transport	5	456	114	24599	0.063	0.14	// GgaAffx.2712.2.S1_s_at // GgaAffx.6107.1.S1_s_at // GgaAffx.21393.1.S1_s_at // Gga.3864.1.S1_at // Gga.11343.1.S1_at
GO:0044092	P	negative regulation of molecular function	6	456	151	24599	0.064	0.14	// GgaAffx.22685.1.S1_at // GgaAffx.23028.1.S1_s_at // GgaAffx.2639.1.S1_at // GgaAffx.25648.2.S1_s_at // GgaAffx.2648.1.S1_s_at // Gga.3864.1.S1_at
GO:0010033	P	response to organic substance	12	456	389	24599	0.064	0.14	// Gga.5397.1.S1_at // GgaAffx.23988.2.S1_s_at // GgaAffx.6526.1.S1_s_at // Gga.1132.1.S1_at // GgaAffx.24934.1.S1_s_at // Gga.4223.1.S1_at // Gga.4425.1.S1_at // GgaAffx.6526.7.S1_s_at // GgaAffx.5541.1.S1_at // Gga.51.1.S1_at // GgaAffx.21825.1.S1_s_at // GgaAffx.2648.1.S1_s_at
GO:0015698	P	inorganic anion transport	8	456	227	24599	0.064	0.14	// GgaAffx.9310.1.S1_s_at // GgaAffx.25037.1.S1_at // GgaAffx.4984.1.S1_at // GgaAffx.9798.1.S1_at // GgaAffx.25677.1.S1_s_at // GgaAffx.5008.1.S1_at // GgaAffx.1852.2.S1_s_at // GgaAffx.4984.2.S1_s_at
GO:0043405	P	regulation of MAP kinase activity	5	456	117	24599	0.068	0.14	// GgaAffx.26684.1.S1_at // GgaAffx.23028.1.S1_s_at // Gga.3864.1.S1_at // GgaAffx.10350.1.S1_at // GgaAffx.22685.1.S1_at
GO:0044275	P	cellular carbohydrate catabolic process	5	456	117	24599	0.068	0.14	// Gga.4909.2.S1_s_at // GgaAffx.25875.1.S1_s_at // Gga.19278.1.S1_s_at // Gga.4119.1.S1_at // GgaAffx.6314.1.S1_s_at
GO:0008544	P	epidermis development	5	456	117	24599	0.068	0.14	// GgaAffx.24000.1.S1_s_at // Gga.345.1.S1_at // GgaAffx.24000.2.S1_s_at // Gga.4006.2.S1_a_at // Gga.3864.1.S1_at
GO:0007600	P	sensory perception	14	456	480	24599	0.07	0.15	// GgaAffx.9310.1.S1_s_at // GgaAffx.7131.1.S1_at // Gga.12745.1.S1_at // GgaAffx.25037.1.S1_at // GgaAffx.13099.1.S1_at // GgaAffx.1572.1.S1_at // GgaAffx.5008.1.S1_at // Gga.18756.1.S1_s_at // GgaAffx.4006.1.S1_at // GgaAffx.21825.1.S1_s_at // GgaAffx.1279.2.S1_s_at // Gga.7556.1.S1_at // GgaAffx.8115.3.S1_s_at // Gga.637.1.S1_at
GO:0040008	P	regulation of growth	9	456	272	24599	0.071	0.15	// GgaAffx.7407.1.S1_s_at // Gga.1742.1.S1_a_at // GgaAffx.2055.1.S1_s_at // GgaAffx.24844.1.S1_at // Gga.6009.1.S1_s_at // GgaAffx.23988.1.S1_at // Gga.502.1.S1_at // GgaAffx.20978.1.S1_s_at // Gga.19791.1.S1_s_at
GO:0022604	P	regulation of cell morphogenesis	5	456	119	24599	0.072	0.15	// GgaAffx.26299.1.S1_s_at // Gga.12043.2.S1_a_at // Gga.3864.1.S1_at // GgaAffx.25247.1.S1_at // Gga.12043.1.S1_at
GO:0046365	P	monosaccharide catabolic process	5	456	119	24599	0.072	0.15	// Gga.4909.2.S1_s_at // GgaAffx.25875.1.S1_s_at // Gga.19278.1.S1_s_at // Gga.4119.1.S1_at // GgaAffx.6314.1.S1_s_at
GO:0006664	P	glycolipid metabolic process	5	456	120	24599	0.074	0.15	// GgaAffx.23361.1.S1_at // Gga.8411.3.S1_s_at // GgaAffx.711.1.A1_at // Gga.7556.1.S1_at // GgaAffx.24612.1.S1_at
GO:0006928	P	cellular component movement	15	456	531	24599	0.077	0.16	// Gga.2967.1.S1_at // Gga.345.1.S1_at // GgaAffx.26299.1.S1_s_at // GgaAffx.8887.1.S1_s_at // Gga.3864.1.S1_at // GgaAffx.23988.2.S1_s_at // GgaAffx.12155.1.S1_s_at // Gga.12255.1.S1_s_at // GgaAffx.25247.1.S1_at // GgaAffx.25609.2.S1_s_at // GgaAffx.25609.1.S1_at // GgaAffx.24100.1.S1_s_at // Gga.11132.1.S1_at // Gga.1828.1.S1_at // Gga.10758.1.S1_at
GO:0006807	P	nitrogen compound metabolic process	107	456	4935	24599	0.08	0.16	// GgaAffx.23641.3.S1_s_at // GgaAffx.26777.1.S1_s_at // GgaAffx.20192.1.S1_s_at // Gga.2166.1.S1_at // GgaAffx.1528.1.S1_at // Gga.19278.1.S1_s_at // GgaAffx.5095.1.S1_at // GgaAffx.681.3.S1_s_at // Gga.7320.1.S1_s_at // Gga.5922.2.S1_a_at // GgaAffx.22014.2.S1_s_at // GgaAffx.3310.1.S1_s_at // GgaAffx.26288.1.S1_s_at // GgaAffx.882.2.S1_s_at // GgaAffx.12279.1.S1_s_at // Gga.4315.3.S1_a_at // G…
GO:0006873	P	cellular ion homeostasis	11	456	363	24599	0.081	0.17	// GgaAffx.22855.1.S1_at // Gga.9347.3.S1_a_at // GgaAffx.9516.1.S1_at // Gga.3864.1.S1_at // Gga.4909.2.S1_s_at // GgaAffx.24934.1.S1_s_at // GgaAffx.4006.1.S1_at // GgaAffx.4023.1.S1_at // GgaAffx.24196.1.S1_s_at // Gga.7556.1.S1_at // Gga.3286.1.S1_at
GO:0050767	P	regulation of neurogenesis	6	456	161	24599	0.082	0.17	// GgaAffx.26299.1.S1_s_at // GgaAffx.23641.3.S1_s_at // Gga.4722.1.S1_s_at // GgaAffx.1143.1.S1_s_at // Gga.345.1.S1_at // Gga.3864.1.S1_at
GO:0030900	P	forebrain development	5	456	124	24599	0.083	0.17	// Gga.9347.3.S1_a_at // GgaAffx.5951.1.S1_s_at // Gga.2908.1.S1_at // Gga.345.1.S1_at // Gga.3864.1.S1_at
GO:0050877	P	neurological system process	25	456	990	24599	0.084	0.17	// Gga.9347.3.S1_a_at // GgaAffx.25037.1.S1_at // GgaAffx.24899.1.S1_at // GgaAffx.13099.1.S1_at // Gga.16450.1.S1_at // Gga.19278.1.S1_s_at // Gga.7556.1.S1_at // GgaAffx.1143.1.S1_s_at // Gga.18756.1.S1_s_at // GgaAffx.26299.1.S1_s_at // Gga.12745.1.S1_at // GgaAffx.8115.3.S1_s_at // Gga.51.1.S1_at // GgaAffx.1279.2.S1_s_at // Gga.637.1.S1_at // GgaAffx.9310.1.S1_s_at // GgaAffx.7131.1.S1_at //…
GO:0019637	P	organophosphate metabolic process	9	456	282	24599	0.084	0.17	// GgaAffx.24924.1.S1_at // GgaAffx.26610.2.S1_s_at // GgaAffx.7526.1.S1_at // Gga.5922.2.S1_a_at // Gga.11447.1.S1_a_at // GgaAffx.7131.1.S1_at // Gga.7797.1.S1_s_at // GgaAffx.12570.1.S1_s_at // GgaAffx.23494.1.S1_s_at
GO:0007264	P	small GTPase mediated signal transduction	17	456	630	24599	0.087	0.17	// GgaAffx.5994.1.S1_at // GgaAffx.26411.1.S1_s_at // GgaAffx.4150.2.S1_s_at // GgaAffx.23564.2.S1_s_at // Gga.5263.3.S1_s_at // Gga.6009.1.S1_s_at // GgaAffx.23641.3.S1_s_at // Gga.4119.1.S1_at // GgaAffx.26684.1.S1_at // GgaAffx.6799.1.S1_s_at // GgaAffx.21483.1.S1_at // GgaAffx.25247.1.S1_at // GgaAffx.7879.1.S1_at // GgaAffx.26615.2.S1_s_at // GgaAffx.24709.1.S1_s_at // Gga.1828.1.S1_at // Gg…
GO:0055082	P	cellular chemical homeostasis	11	456	368	24599	0.087	0.17	// GgaAffx.22855.1.S1_at // Gga.9347.3.S1_a_at // GgaAffx.9516.1.S1_at // Gga.3864.1.S1_at // Gga.4909.2.S1_s_at // GgaAffx.24934.1.S1_s_at // GgaAffx.4006.1.S1_at // GgaAffx.4023.1.S1_at // GgaAffx.24196.1.S1_s_at // Gga.7556.1.S1_at // Gga.3286.1.S1_at
GO:0046907	P	intracellular transport	19	456	721	24599	0.088	0.17	// GgaAffx.2572.1.S1_at // GgaAffx.21393.1.S1_s_at // Gga.3864.1.S1_at // Gga.16527.1.S1_at // GgaAffx.25679.1.S1_s_at // GgaAffx.24832.2.S1_s_at // GgaAffx.26038.1.S1_at // GgaAffx.25648.2.S1_s_at // Gga.345.1.S1_at // Gga.2044.3.S1_a_at // GgaAffx.2648.1.S1_s_at // GgaAffx.24832.1.S1_s_at // GgaAffx.1279.2.S1_s_at // Gga.6118.1.S1_at // Gga.11343.1.S1_at // Gga.10758.1.S1_at // Gga.5522.2.S1_a_…
GO:0034637	P	cellular carbohydrate biosynthetic process	5	456	127	24599	0.089	0.18	// Gga.4909.2.S1_s_at // GgaAffx.2648.1.S1_s_at // Gga.19278.1.S1_s_at // Gga.4119.1.S1_at // GgaAffx.25875.1.S1_s_at
GO:0033365	P	protein localization in organelle	6	456	165	24599	0.089	0.18	// GgaAffx.2648.1.S1_s_at // Gga.16527.1.S1_at // GgaAffx.26038.1.S1_at // Gga.345.1.S1_at // Gga.2044.3.S1_a_at // Gga.11343.1.S1_at
GO:0007398	P	ectoderm development	5	456	127	24599	0.089	0.18	// GgaAffx.24000.1.S1_s_at // Gga.345.1.S1_at // GgaAffx.24000.2.S1_s_at // Gga.4006.2.S1_a_at // Gga.3864.1.S1_at
GO:0016311	P	dephosphorylation	8	456	245	24599	0.09	0.18	// Gga.14253.1.S1_at // GgaAffx.681.3.S1_s_at // GgaAffx.23111.1.S1_s_at // GgaAffx.7526.1.S1_at // GgaAffx.24127.1.S1_at // Gga.18461.1.S1_s_at // GgaAffx.5993.1.S1_at // GgaAffx.3218.1.S1_s_at
GO:0042391	P	regulation of membrane potential	5	456	128	24599	0.092	0.18	// GgaAffx.22855.1.S1_at // Gga.4909.2.S1_s_at // GgaAffx.24934.1.S1_s_at // GgaAffx.4006.1.S1_at // GgaAffx.4023.1.S1_at
GO:0051707	P	response to other organism	5	456	129	24599	0.094	0.18	// GgaAffx.4249.1.S1_x_at // Gga.12255.1.S1_s_at // GgaAffx.5951.1.S1_s_at // Gga.6936.1.A1_at // Gga.13140.1.S1_s_at
GO:0006470	P	protein amino acid dephosphorylation	7	456	208	24599	0.096	0.19	// Gga.14253.1.S1_at // GgaAffx.681.3.S1_s_at // GgaAffx.23111.1.S1_s_at // GgaAffx.24127.1.S1_at // Gga.18461.1.S1_s_at // GgaAffx.5993.1.S1_at // GgaAffx.3218.1.S1_s_at
GO:0042967	P	acyl-carrier-protein biosynthetic process	6	456	169	24599	0.097	0.19	// GgaAffx.20100.1.S1_at // Gga.16586.1.S1_at // GgaAffx.23976.1.S1_at // GgaAffx.24459.2.S1_s_at // Gga.6085.3.S1_a_at // GgaAffx.9403.1.S1_s_at
GO:0001525	P	angiogenesis	6	456	171	24599	0.1	0.2	// GgaAffx.26610.2.S1_s_at // Gga.345.1.S1_at // Gga.458.1.S1_s_at // GgaAffx.24100.1.S1_s_at // GgaAffx.20978.1.S1_s_at // Gga.10758.1.S1_at
GO:0008285	P	negative regulation of cell proliferation	8	456	253	24599	0.1	0.2	// GgaAffx.10968.1.S1_at // GgaAffx.9514.1.S1_at // Gga.4722.1.S1_s_at // Gga.345.1.S1_at // GgaAffx.20978.1.S1_s_at // GgaAffx.2648.1.S1_s_at // Gga.2908.1.S1_at // GgaAffx.10968.2.S1_s_at
GO:0048285	P	organelle fission	7	456	212	24599	0.1	0.2	// GgaAffx.24462.1.S1_at // GgaAffx.6430.1.S1_at // GgaAffx.882.2.S1_s_at // GgaAffx.1012.1.S1_at // Gga.502.1.S1_at // GgaAffx.20285.1.S1_s_at // GgaAffx.23988.1.S1_at
GO:0009309	P	amine biosynthetic process	5	456	134	24599	0.11	0.2	// Gga.4425.1.S1_at // GgaAffx.9792.1.S1_at // GgaAffx.10350.1.S1_at // GgaAffx.12570.1.S1_s_at // GgaAffx.26483.1.S1_s_at
GO:0009056	P	catabolic process	38	456	1635	24599	0.11	0.2	// Gga.4909.2.S1_s_at // GgaAffx.1852.2.S1_s_at // Gga.1132.1.S1_at // Gga.4425.1.S1_at // Gga.19278.1.S1_s_at // Gga.5623.2.S1_s_at // Gga.7556.1.S1_at // Gga.7797.1.S1_s_at // Gga.4119.1.S1_at // GgaAffx.23840.1.S1_s_at // GgaAffx.4468.1.S1_at // GgaAffx.8298.1.S1_at // Gga.345.1.S1_at // Gga.6085.3.S1_a_at // GgaAffx.25677.1.S1_s_at // GgaAffx.6799.1.S1_s_at // Gga.8411.3.S1_s_at // GgaAffx.63…
GO:0000165	P	MAPKKK cascade	7	456	214	24599	0.11	0.2	// GgaAffx.22685.1.S1_at // GgaAffx.23028.1.S1_s_at // GgaAffx.10350.1.S1_at // GgaAffx.26684.1.S1_at // GgaAffx.5993.1.S1_at // Gga.2908.1.S1_at // Gga.3864.1.S1_at
GO:0065009	P	regulation of molecular function	24	456	974	24599	0.11	0.2	// Gga.9347.3.S1_a_at // GgaAffx.23641.3.S1_s_at // Gga.5263.3.S1_s_at // Gga.6009.1.S1_s_at // GgaAffx.2639.1.S1_at // GgaAffx.4150.2.S1_s_at // GgaAffx.26684.1.S1_at // GgaAffx.22685.1.S1_at // GgaAffx.6799.1.S1_s_at // Gga.2509.1.S1_at // Gga.345.1.S1_at // GgaAffx.21483.1.S1_at // GgaAffx.2648.1.S1_s_at // GgaAffx.9422.2.S1_s_at // GgaAffx.10350.1.S1_at // GgaAffx.7879.1.S1_at // GgaAffx.2661…
GO:0007010	P	cytoskeleton organization	15	456	561	24599	0.11	0.2	// GgaAffx.24513.9.S1_s_at // Gga.12255.1.S1_s_at // GgaAffx.23988.2.S1_s_at // GgaAffx.23564.2.S1_s_at // GgaAffx.5630.9.S1_s_at // GgaAffx.10417.7.S1_s_at // GgaAffx.25247.1.S1_at // GgaAffx.25609.2.S1_s_at // GgaAffx.25609.1.S1_at // GgaAffx.26684.1.S1_at // GgaAffx.8655.1.S1_s_at // GgaAffx.23988.1.S1_at // GgaAffx.24513.7.S1_s_at // GgaAffx.8894.1.S1_at // Gga.637.1.S1_at
GO:0051960	P	regulation of nervous system development	6	456	175	24599	0.11	0.21	// GgaAffx.26299.1.S1_s_at // GgaAffx.23641.3.S1_s_at // Gga.4722.1.S1_s_at // GgaAffx.1143.1.S1_s_at // Gga.345.1.S1_at // Gga.3864.1.S1_at
GO:0006468	P	protein amino acid phosphorylation	23	456	932	24599	0.11	0.21	// GgaAffx.6023.1.S1_at // GgaAffx.23641.3.S1_s_at // GgaAffx.4590.1.S1_at // GgaAffx.26299.1.S1_s_at // GgaAffx.24503.1.S1_s_at // GgaAffx.1528.1.S1_at // Gga.2908.1.S1_at // GgaAffx.21433.1.S1_s_at // GgaAffx.26684.1.S1_at // GgaAffx.549.1.S1_at // GgaAffx.7522.1.S1_s_at // GgaAffx.2648.1.S1_s_at // GgaAffx.26288.1.S1_s_at // GgaAffx.9514.1.S1_at // GgaAffx.10350.1.S1_at // GgaAffx.20978.1.S1_s…
GO:0009112	P	nucleobase metabolic process	7	456	216	24599	0.11	0.21	// GgaAffx.1852.2.S1_s_at // GgaAffx.8298.1.S1_at // GgaAffx.26777.1.S1_s_at // GgaAffx.25940.1.S1_at // GgaAffx.25677.1.S1_s_at // GgaAffx.7522.1.S1_s_at // Gga.7320.1.S1_s_at
GO:0016192	P	vesicle-mediated transport	15	456	564	24599	0.11	0.21	// GgaAffx.23641.3.S1_s_at // Gga.3864.1.S1_at // GgaAffx.24844.1.S1_at // GgaAffx.24832.1.S1_s_at // Gga.5263.3.S1_s_at // Gga.19791.1.S1_s_at // Gga.3635.1.S1_at // GgaAffx.1328.2.S1_s_at // GgaAffx.10564.2.S1_s_at // GgaAffx.1279.2.S1_s_at // GgaAffx.24709.1.S1_s_at // Gga.11343.1.S1_at // GgaAffx.24832.2.S1_s_at // Gga.6118.1.S1_at // Gga.637.1.S1_at
GO:0016043	P	cellular component organization	56	456	2526	24599	0.12	0.21	// Gga.2967.1.S1_at // Gga.9347.3.S1_a_at // GgaAffx.23641.3.S1_s_at // GgaAffx.25037.1.S1_at // Gga.16527.1.S1_at // GgaAffx.23988.2.S1_s_at // GgaAffx.24832.2.S1_s_at // GgaAffx.10012.1.S1_at // Gga.12043.1.S1_at // GgaAffx.26038.1.S1_at // GgaAffx.23988.1.S1_at // GgaAffx.10564.2.S1_s_at // Gga.7556.1.S1_at // GgaAffx.8894.1.S1_at // Gga.19791.1.S1_s_at // Gga.4722.1.S1_s_at // GgaAffx.22855.1…
GO:0045595	P	regulation of cell differentiation	10	456	347	24599	0.12	0.22	// GgaAffx.20531.1.S1_s_at // GgaAffx.26299.1.S1_s_at // GgaAffx.23641.3.S1_s_at // Gga.4722.1.S1_s_at // GgaAffx.1852.2.S1_s_at // GgaAffx.25677.1.S1_s_at // GgaAffx.1143.1.S1_s_at // Gga.345.1.S1_at // Gga.2908.1.S1_at // Gga.3864.1.S1_at
GO:0009395	P	phospholipid catabolic process	5	456	139	24599	0.12	0.22	// Gga.7797.1.S1_s_at // Gga.11447.1.S1_a_at // GgaAffx.26610.2.S1_s_at // GgaAffx.23494.1.S1_s_at // Gga.5922.2.S1_a_at
GO:0060284	P	regulation of cell development	6	456	180	24599	0.12	0.22	// GgaAffx.26299.1.S1_s_at // GgaAffx.23641.3.S1_s_at // Gga.4722.1.S1_s_at // GgaAffx.1143.1.S1_s_at // Gga.345.1.S1_at // Gga.3864.1.S1_at
GO:0043065	P	positive regulation of apoptosis	8	456	263	24599	0.12	0.22	// GgaAffx.9649.1.S1_at // Gga.3864.1.S1_at // GgaAffx.23789.1.S1_at // GgaAffx.5618.1.S1_at // Gga.345.1.S1_at // Gga.8774.1.S1_s_at // Gga.7254.2.S1_a_at // Gga.2908.1.S1_at
GO:0051704	P	multi-organism process	8	456	263	24599	0.12	0.22	// Gga.9347.3.S1_a_at // Gga.12255.1.S1_s_at // GgaAffx.5951.1.S1_s_at // GgaAffx.25037.1.S1_at // GgaAffx.7407.1.S1_s_at // GgaAffx.4249.1.S1_x_at // Gga.6936.1.A1_at // Gga.13140.1.S1_s_at
GO:0048869	P	cellular developmental process	37	456	1614	24599	0.12	0.22	// Gga.4909.2.S1_s_at // GgaAffx.23641.3.S1_s_at // GgaAffx.25037.1.S1_at // GgaAffx.1852.2.S1_s_at // GgaAffx.26777.1.S1_s_at // GgaAffx.10012.1.S1_at // GgaAffx.26299.1.S1_s_at // GgaAffx.24000.2.S1_s_at // GgaAffx.25247.1.S1_at // Gga.11132.1.S1_at // GgaAffx.26220.2.S1_s_at // GgaAffx.5095.1.S1_at // Gga.4722.1.S1_s_at // GgaAffx.22855.1.S1_at // Gga.7320.1.S1_s_at // Gga.345.1.S1_at // GgaAf…
GO:0032990	P	cell part morphogenesis	8	456	265	24599	0.12	0.22	// GgaAffx.22855.1.S1_at // GgaAffx.26299.1.S1_s_at // GgaAffx.23641.3.S1_s_at // GgaAffx.882.2.S1_s_at // Gga.345.1.S1_at // GgaAffx.12155.1.S1_s_at // GgaAffx.24100.1.S1_s_at // Gga.3864.1.S1_at
GO:0043068	P	positive regulation of programmed cell death	8	456	266	24599	0.13	0.22	// GgaAffx.9649.1.S1_at // Gga.3864.1.S1_at // GgaAffx.23789.1.S1_at // GgaAffx.5618.1.S1_at // Gga.345.1.S1_at // Gga.8774.1.S1_s_at // Gga.7254.2.S1_a_at // Gga.2908.1.S1_at
GO:0050804	P	regulation of synaptic transmission	5	456	142	24599	0.13	0.22	// GgaAffx.26299.1.S1_s_at // Gga.10758.1.S1_at // Gga.51.1.S1_at // GgaAffx.1143.1.S1_s_at // Gga.3864.1.S1_at
GO:0010942	P	positive regulation of cell death	8	456	266	24599	0.13	0.22	// GgaAffx.9649.1.S1_at // Gga.3864.1.S1_at // GgaAffx.23789.1.S1_at // GgaAffx.5618.1.S1_at // Gga.345.1.S1_at // Gga.8774.1.S1_s_at // Gga.7254.2.S1_a_at // Gga.2908.1.S1_at
GO:0010627	P	regulation of protein kinase cascade	6	456	183	24599	0.13	0.23	// GgaAffx.6400.2.S1_s_at // GgaAffx.10350.1.S1_at // GgaAffx.26684.1.S1_at // Gga.8774.1.S1_s_at // Gga.502.1.S1_at // GgaAffx.2648.1.S1_s_at
GO:0007267	P	cell-cell signaling	18	456	717	24599	0.13	0.23	// GgaAffx.26299.1.S1_s_at // Gga.51.1.S1_at // GgaAffx.24899.1.S1_at // Gga.345.1.S1_at // GgaAffx.20100.1.S1_at // Gga.3864.1.S1_at // GgaAffx.1143.1.S1_s_at // GgaAffx.24100.1.S1_s_at // GgaAffx.8655.1.S1_s_at // Gga.19278.1.S1_s_at // GgaAffx.1474.1.S1_at // GgaAffx.24899.1.S1_s_at // GgaAffx.20978.1.S1_s_at // Gga.8774.1.S1_s_at // GgaAffx.25875.1.S1_s_at // Gga.10758.1.S1_at // GgaAffx.4023…
GO:0006996	P	organelle organization	31	456	1339	24599	0.13	0.24	// Gga.16527.1.S1_at // GgaAffx.23988.2.S1_s_at // GgaAffx.10012.1.S1_at // GgaAffx.25609.2.S1_s_at // Gga.7556.1.S1_at // GgaAffx.8894.1.S1_at // GgaAffx.24462.1.S1_at // GgaAffx.26684.1.S1_at // Gga.12255.1.S1_s_at // GgaAffx.5630.9.S1_s_at // GgaAffx.25247.1.S1_at // GgaAffx.25609.1.S1_at // GgaAffx.24513.7.S1_s_at // GgaAffx.882.2.S1_s_at // GgaAffx.10417.7.S1_s_at // GgaAffx.24832.1.S1_s_at …
GO:0001501	P	skeletal system development	8	456	272	24599	0.14	0.24	// Gga.3864.1.S1_at // GgaAffx.13099.1.S1_at // GgaAffx.25940.1.S1_at // GgaAffx.9422.2.S1_s_at // Gga.345.1.S1_at // GgaAffx.20978.1.S1_s_at // GgaAffx.8115.3.S1_s_at // GgaAffx.5095.1.S1_at
GO:0051128	P	regulation of cellular component organization	12	456	449	24599	0.14	0.24	// GgaAffx.24462.1.S1_at // GgaAffx.6430.1.S1_at // GgaAffx.26299.1.S1_s_at // Gga.12043.2.S1_a_at // Gga.3864.1.S1_at // GgaAffx.5630.9.S1_s_at // GgaAffx.1012.1.S1_at // GgaAffx.25247.1.S1_at // Gga.12043.1.S1_at // GgaAffx.23641.3.S1_s_at // GgaAffx.2648.1.S1_s_at // GgaAffx.8944.1.S1_s_at
GO:0044271	P	cellular nitrogen compound biosynthetic process	7	456	230	24599	0.14	0.24	// GgaAffx.9792.1.S1_at // GgaAffx.882.2.S1_s_at // GgaAffx.26483.1.S1_s_at // GgaAffx.12279.1.S1_s_at // GgaAffx.10350.1.S1_at // Gga.4425.1.S1_at // GgaAffx.12570.1.S1_s_at
GO:0006644	P	phospholipid metabolic process	8	456	273	24599	0.14	0.24	// GgaAffx.7131.1.S1_at // GgaAffx.26610.2.S1_s_at // GgaAffx.7526.1.S1_at // Gga.5922.2.S1_a_at // Gga.11447.1.S1_a_at // Gga.7797.1.S1_s_at // GgaAffx.12570.1.S1_s_at // GgaAffx.23494.1.S1_s_at
GO:0051969	P	regulation of transmission of nerve impulse	5	456	148	24599	0.14	0.25	// GgaAffx.26299.1.S1_s_at // Gga.10758.1.S1_at // Gga.51.1.S1_at // GgaAffx.1143.1.S1_s_at // Gga.3864.1.S1_at
GO:0015031	P	protein transport	20	456	825	24599	0.15	0.25	// GgaAffx.9516.1.S1_at // Gga.11343.1.S1_at // Gga.3864.1.S1_at // Gga.16527.1.S1_at // GgaAffx.23789.1.S1_at // GgaAffx.25679.1.S1_s_at // GgaAffx.24832.1.S1_s_at // GgaAffx.24832.2.S1_s_at // GgaAffx.26038.1.S1_at // Gga.345.1.S1_at // GgaAffx.1328.2.S1_s_at // Gga.2044.3.S1_a_at // GgaAffx.2648.1.S1_s_at // GgaAffx.10564.2.S1_s_at // Gga.6118.1.S1_at // Gga.1828.1.S1_at // Gga.10758.1.S1_at /…
GO:0035295	P	tube development	6	456	191	24599	0.15	0.25	// Gga.3864.1.S1_at // Gga.345.1.S1_at // GgaAffx.25609.2.S1_s_at // GgaAffx.25609.1.S1_at // GgaAffx.24100.1.S1_s_at // GgaAffx.20978.1.S1_s_at
GO:0003001	P	generation of a signal involved in cell-cell signaling	5	456	150	24599	0.15	0.25	// GgaAffx.20100.1.S1_at // Gga.10758.1.S1_at // GgaAffx.4006.1.S1_at // GgaAffx.4023.1.S1_at // Gga.3864.1.S1_at
GO:0045184	P	establishment of protein localization	20	456	830	24599	0.15	0.26	// GgaAffx.9516.1.S1_at // Gga.11343.1.S1_at // Gga.3864.1.S1_at // Gga.16527.1.S1_at // GgaAffx.23789.1.S1_at // GgaAffx.25679.1.S1_s_at // GgaAffx.24832.1.S1_s_at // GgaAffx.24832.2.S1_s_at // GgaAffx.26038.1.S1_at // Gga.345.1.S1_at // GgaAffx.1328.2.S1_s_at // Gga.2044.3.S1_a_at // GgaAffx.2648.1.S1_s_at // GgaAffx.10564.2.S1_s_at // Gga.6118.1.S1_at // Gga.1828.1.S1_at // Gga.10758.1.S1_at /…
GO:0031644	P	regulation of neurological system process	5	456	151	24599	0.15	0.26	// GgaAffx.26299.1.S1_s_at // Gga.10758.1.S1_at // Gga.51.1.S1_at // GgaAffx.1143.1.S1_s_at // Gga.3864.1.S1_at
GO:0065007	P	biological regulation	157	456	7684	24599	0.16	0.26	// GgaAffx.23641.3.S1_s_at // GgaAffx.26777.1.S1_s_at // GgaAffx.20192.1.S1_s_at // GgaAffx.6391.2.S1_s_at // Gga.19278.1.S1_s_at // GgaAffx.25247.1.S1_at // Gga.2908.1.S1_at // GgaAffx.5095.1.S1_at // GgaAffx.25609.1.S1_at // GgaAffx.23149.2.S1_s_at // Gga.7320.1.S1_s_at // Gga.1742.1.S1_a_at // GgaAffx.5630.9.S1_s_at // Gga.8293.1.S1_at // GgaAffx.4059.1.S1_s_at // GgaAffx.26299.1.S1_s_at // Gg…
GO:0044267	P	cellular protein metabolic process	60	456	2799	24599	0.16	0.27	// GgaAffx.6023.1.S1_at // GgaAffx.23641.3.S1_s_at // GgaAffx.1433.3.S1_s_at // GgaAffx.21140.1.S1_s_at // GgaAffx.20192.1.S1_s_at // Gga.63.1.S1_s_at // GgaAffx.20285.1.S1_s_at // GgaAffx.26299.1.S1_s_at // GgaAffx.20978.1.S1_s_at // GgaAffx.24503.1.S1_s_at // GgaAffx.1528.1.S1_at // GgaAffx.2648.1.S1_s_at // GgaAffx.4590.1.S1_at // Gga.7556.1.S1_at // Gga.9700.2.S1_a_at // GgaAffx.21433.1.S1_s_…
GO:0048856	P	anatomical structure development	54	456	2505	24599	0.16	0.27	// Gga.2967.1.S1_at // Gga.9347.3.S1_a_at // GgaAffx.23641.3.S1_s_at // GgaAffx.25037.1.S1_at // GgaAffx.1852.2.S1_s_at // Gga.4909.2.S1_s_at // GgaAffx.13099.1.S1_at // GgaAffx.10012.1.S1_at // GgaAffx.25609.2.S1_s_at // GgaAffx.22594.1.S1_s_at // GgaAffx.24000.2.S1_s_at // GgaAffx.25247.1.S1_at // GgaAffx.10949.1.S1_s_at // Gga.11132.1.S1_at // GgaAffx.26220.2.S1_s_at // GgaAffx.5095.1.S1_at //…
GO:0048729	P	tissue morphogenesis	6	456	198	24599	0.17	0.28	// GgaAffx.25609.2.S1_s_at // GgaAffx.25609.1.S1_at // Gga.345.1.S1_at // Gga.1891.1.S1_at // GgaAffx.20978.1.S1_s_at // Gga.2908.1.S1_at
GO:0010648	P	negative regulation of cell communication	7	456	242	24599	0.17	0.28	// GgaAffx.10012.1.S1_at // GgaAffx.25545.1.S1_at // GgaAffx.2639.1.S1_at // Gga.502.1.S1_at // Gga.51.1.S1_at // GgaAffx.2648.1.S1_s_at // Gga.2908.1.S1_at
GO:0010605	P	negative regulation of macromolecule metabolic process	14	456	561	24599	0.17	0.28	// GgaAffx.7407.1.S1_s_at // GgaAffx.22432.1.S1_at // GgaAffx.25545.1.S1_at // GgaAffx.24934.1.S1_s_at // Gga.345.1.S1_at // GgaAffx.2639.1.S1_at // GgaAffx.4006.1.S1_at // GgaAffx.4023.1.S1_at // Gga.18491.1.S1_s_at // GgaAffx.2648.1.S1_s_at // GgaAffx.25789.4.S1_s_at // GgaAffx.25648.2.S1_s_at // GgaAffx.5095.1.S1_at // Gga.3864.1.S1_at
GO:0007409	P	axonogenesis	7	456	244	24599	0.17	0.29	// GgaAffx.22855.1.S1_at // GgaAffx.26299.1.S1_s_at // GgaAffx.23641.3.S1_s_at // Gga.3864.1.S1_at // Gga.345.1.S1_at // GgaAffx.12155.1.S1_s_at // GgaAffx.24100.1.S1_s_at
GO:0048699	P	generation of neurons	14	456	564	24599	0.17	0.29	// GgaAffx.22855.1.S1_at // GgaAffx.26299.1.S1_s_at // GgaAffx.23641.3.S1_s_at // GgaAffx.25037.1.S1_at // Gga.345.1.S1_at // GgaAffx.12155.1.S1_s_at // Gga.3864.1.S1_at // GgaAffx.1143.1.S1_s_at // GgaAffx.26684.1.S1_at // GgaAffx.24100.1.S1_s_at // GgaAffx.1279.2.S1_s_at // Gga.11132.1.S1_at // Gga.2908.1.S1_at // Gga.4722.1.S1_s_at
GO:0007265	P	Ras protein signal transduction	10	456	380	24599	0.18	0.29	// GgaAffx.26411.1.S1_s_at // GgaAffx.4150.2.S1_s_at // GgaAffx.6799.1.S1_s_at // Gga.5263.3.S1_s_at // Gga.6009.1.S1_s_at // GgaAffx.21483.1.S1_at // GgaAffx.7879.1.S1_at // GgaAffx.23641.3.S1_s_at // GgaAffx.24709.1.S1_s_at // GgaAffx.789.1.S1_at
GO:0048666	P	neuron development	10	456	382	24599	0.18	0.29	// GgaAffx.22855.1.S1_at // GgaAffx.26299.1.S1_s_at // GgaAffx.23641.3.S1_s_at // GgaAffx.25037.1.S1_at // Gga.345.1.S1_at // GgaAffx.12155.1.S1_s_at // GgaAffx.26684.1.S1_at // GgaAffx.24100.1.S1_s_at // GgaAffx.1279.2.S1_s_at // Gga.3864.1.S1_at
GO:0009790	P	embryonic development	14	456	569	24599	0.18	0.3	// Gga.9347.3.S1_a_at // GgaAffx.5951.1.S1_s_at // GgaAffx.25037.1.S1_at // Gga.4909.2.S1_s_at // Gga.1891.1.S1_at // GgaAffx.25609.2.S1_s_at // GgaAffx.22594.1.S1_s_at // Gga.345.1.S1_at // GgaAffx.25609.1.S1_at // GgaAffx.10949.1.S1_s_at // GgaAffx.20978.1.S1_s_at // GgaAffx.1279.2.S1_s_at // GgaAffx.5095.1.S1_at // Gga.3864.1.S1_at
GO:0009968	P	negative regulation of signal transduction	6	456	206	24599	0.19	0.3	// GgaAffx.10012.1.S1_at // GgaAffx.25545.1.S1_at // GgaAffx.2639.1.S1_at // Gga.502.1.S1_at // GgaAffx.2648.1.S1_s_at // Gga.2908.1.S1_at
GO:0055085	P	transmembrane transport	7	456	250	24599	0.19	0.3	// Gga.11343.1.S1_at // GgaAffx.13099.1.S1_at // GgaAffx.8115.3.S1_s_at // GgaAffx.10526.2.S1_s_at // GgaAffx.25648.2.S1_s_at // GgaAffx.3622.2.S1_s_at // GgaAffx.10104.2.S1_s_at
GO:0000280	P	nuclear division	6	456	208	24599	0.19	0.31	// GgaAffx.24462.1.S1_at // GgaAffx.6430.1.S1_at // GgaAffx.1012.1.S1_at // Gga.502.1.S1_at // GgaAffx.20285.1.S1_s_at // GgaAffx.23988.1.S1_at
GO:0007067	P	mitosis	6	456	208	24599	0.19	0.31	// GgaAffx.24462.1.S1_at // GgaAffx.6430.1.S1_at // GgaAffx.1012.1.S1_at // Gga.502.1.S1_at // GgaAffx.20285.1.S1_s_at // GgaAffx.23988.1.S1_at
GO:0001568	P	blood vessel development	7	456	253	24599	0.19	0.31	// GgaAffx.26610.2.S1_s_at // Gga.3864.1.S1_at // Gga.345.1.S1_at // Gga.458.1.S1_s_at // GgaAffx.24100.1.S1_s_at // GgaAffx.20978.1.S1_s_at // Gga.10758.1.S1_at
GO:0001944	P	vasculature development	7	456	255	24599	0.2	0.32	// GgaAffx.26610.2.S1_s_at // Gga.3864.1.S1_at // Gga.345.1.S1_at // Gga.458.1.S1_s_at // GgaAffx.24100.1.S1_s_at // GgaAffx.20978.1.S1_s_at // Gga.10758.1.S1_at
GO:0048812	P	neuron projection morphogenesis	7	456	259	24599	0.21	0.33	// GgaAffx.22855.1.S1_at // GgaAffx.26299.1.S1_s_at // GgaAffx.23641.3.S1_s_at // Gga.3864.1.S1_at // Gga.345.1.S1_at // GgaAffx.12155.1.S1_s_at // GgaAffx.24100.1.S1_s_at
GO:0048858	P	cell projection morphogenesis	7	456	259	24599	0.21	0.33	// GgaAffx.22855.1.S1_at // GgaAffx.26299.1.S1_s_at // GgaAffx.23641.3.S1_s_at // Gga.3864.1.S1_at // Gga.345.1.S1_at // GgaAffx.12155.1.S1_s_at // GgaAffx.24100.1.S1_s_at
GO:0032502	P	developmental process	71	456	3432	24599	0.21	0.33	// Gga.4909.2.S1_s_at // Gga.9347.3.S1_a_at // GgaAffx.25545.1.S1_at // GgaAffx.23641.3.S1_s_at // GgaAffx.25037.1.S1_at // GgaAffx.1852.2.S1_s_at // GgaAffx.26777.1.S1_s_at // GgaAffx.13099.1.S1_at // GgaAffx.24832.2.S1_s_at // GgaAffx.10012.1.S1_at // GgaAffx.26299.1.S1_s_at // GgaAffx.25609.2.S1_s_at // GgaAffx.22594.1.S1_s_at // Gga.458.1.S1_s_at // GgaAffx.24000.2.S1_s_at // GgaAffx.25247.1.…
GO:0009058	P	biosynthetic process	88	456	4297	24599	0.21	0.33	// GgaAffx.26777.1.S1_s_at // Gga.19278.1.S1_s_at // Gga.8312.3.S1_at // GgaAffx.5095.1.S1_at // GgaAffx.9403.1.S1_s_at // Gga.7320.1.S1_s_at // GgaAffx.22014.2.S1_s_at // Gga.8312.4.S1_a_at // GgaAffx.24459.2.S1_s_at // GgaAffx.882.2.S1_s_at // GgaAffx.23089.1.S1_at // GgaAffx.12279.1.S1_s_at // Gga.4315.3.S1_a_at // GgaAffx.2077.1.S1_s_at // GgaAffx.1474.1.S1_at // GgaAffx.22730.1.S1_at // GgaA…
GO:0022008	P	neurogenesis	14	456	589	24599	0.21	0.34	// GgaAffx.22855.1.S1_at // GgaAffx.26299.1.S1_s_at // GgaAffx.23641.3.S1_s_at // GgaAffx.25037.1.S1_at // Gga.345.1.S1_at // GgaAffx.12155.1.S1_s_at // Gga.3864.1.S1_at // GgaAffx.1143.1.S1_s_at // GgaAffx.26684.1.S1_at // GgaAffx.24100.1.S1_s_at // GgaAffx.1279.2.S1_s_at // Gga.11132.1.S1_at // Gga.2908.1.S1_at // Gga.4722.1.S1_s_at
GO:0006897	P	endocytosis	6	456	216	24599	0.22	0.34	// GgaAffx.24844.1.S1_at // Gga.3635.1.S1_at // GgaAffx.10564.2.S1_s_at // GgaAffx.1279.2.S1_s_at // Gga.19791.1.S1_s_at // Gga.11343.1.S1_at
GO:0010324	P	membrane invagination	6	456	216	24599	0.22	0.34	// GgaAffx.24844.1.S1_at // Gga.3635.1.S1_at // GgaAffx.10564.2.S1_s_at // GgaAffx.1279.2.S1_s_at // Gga.19791.1.S1_s_at // Gga.11343.1.S1_at
GO:0009892	P	negative regulation of metabolic process	14	456	591	24599	0.22	0.34	// GgaAffx.7407.1.S1_s_at // GgaAffx.22432.1.S1_at // GgaAffx.25545.1.S1_at // GgaAffx.24934.1.S1_s_at // Gga.345.1.S1_at // GgaAffx.2639.1.S1_at // GgaAffx.4006.1.S1_at // GgaAffx.4023.1.S1_at // Gga.18491.1.S1_s_at // GgaAffx.2648.1.S1_s_at // GgaAffx.25789.4.S1_s_at // GgaAffx.25648.2.S1_s_at // GgaAffx.5095.1.S1_at // Gga.3864.1.S1_at
GO:0060341	P	regulation of cellular localization	5	456	172	24599	0.22	0.34	// GgaAffx.20100.1.S1_at // GgaAffx.2648.1.S1_s_at // GgaAffx.4006.1.S1_at // GgaAffx.4023.1.S1_at // Gga.345.1.S1_at
GO:0007229	P	integrin-mediated signaling pathway	6	456	217	24599	0.22	0.34	// Gga.2967.1.S1_at // GgaAffx.10417.7.S1_s_at // GgaAffx.23988.2.S1_s_at // GgaAffx.23361.1.S1_at // Gga.4048.1.S1_at // GgaAffx.23988.1.S1_at
GO:0048514	P	blood vessel morphogenesis	6	456	218	24599	0.22	0.34	// GgaAffx.26610.2.S1_s_at // Gga.345.1.S1_at // Gga.458.1.S1_s_at // GgaAffx.24100.1.S1_s_at // GgaAffx.20978.1.S1_s_at // Gga.10758.1.S1_at
GO:0003002	P	regionalization	6	456	218	24599	0.22	0.34	// Gga.3864.1.S1_at // GgaAffx.25545.1.S1_at // GgaAffx.25609.2.S1_s_at // GgaAffx.25609.1.S1_at // Gga.345.1.S1_at // GgaAffx.10949.1.S1_s_at
GO:0031175	P	neuron projection development	8	456	310	24599	0.22	0.34	// GgaAffx.22855.1.S1_at // GgaAffx.26299.1.S1_s_at // GgaAffx.23641.3.S1_s_at // Gga.3864.1.S1_at // Gga.345.1.S1_at // GgaAffx.12155.1.S1_s_at // GgaAffx.26684.1.S1_at // GgaAffx.24100.1.S1_s_at
GO:0019538	P	protein metabolic process	71	456	3458	24599	0.23	0.35	// GgaAffx.6023.1.S1_at // Gga.4909.2.S1_s_at // GgaAffx.23641.3.S1_s_at // GgaAffx.1433.3.S1_s_at // GgaAffx.21140.1.S1_s_at // GgaAffx.20192.1.S1_s_at // GgaAffx.4249.1.S1_x_at // GgaAffx.20285.1.S1_s_at // GgaAffx.26299.1.S1_s_at // Gga.1891.1.S1_at // GgaAffx.20978.1.S1_s_at // GgaAffx.24503.1.S1_s_at // GgaAffx.1528.1.S1_at // GgaAffx.2648.1.S1_s_at // GgaAffx.4590.1.S1_at // Gga.10895.1.S1_…
GO:0007275	P	multicellular organismal development	59	456	2849	24599	0.23	0.35	// Gga.4909.2.S1_s_at // Gga.9347.3.S1_a_at // GgaAffx.25545.1.S1_at // GgaAffx.23641.3.S1_s_at // GgaAffx.25037.1.S1_at // GgaAffx.26777.1.S1_s_at // GgaAffx.13099.1.S1_at // GgaAffx.24832.2.S1_s_at // GgaAffx.10012.1.S1_at // GgaAffx.25609.2.S1_s_at // GgaAffx.22594.1.S1_s_at // Gga.458.1.S1_s_at // GgaAffx.24000.2.S1_s_at // GgaAffx.10949.1.S1_s_at // Gga.11132.1.S1_at // GgaAffx.6154.1.S1_at …
GO:0000087	P	M phase of mitotic cell cycle	6	456	220	24599	0.23	0.35	// GgaAffx.24462.1.S1_at // GgaAffx.6430.1.S1_at // GgaAffx.1012.1.S1_at // Gga.502.1.S1_at // GgaAffx.20285.1.S1_s_at // GgaAffx.23988.1.S1_at
GO:0010629	P	negative regulation of gene expression	10	456	406	24599	0.23	0.35	// GgaAffx.7407.1.S1_s_at // GgaAffx.22432.1.S1_at // GgaAffx.25545.1.S1_at // GgaAffx.24934.1.S1_s_at // GgaAffx.4006.1.S1_at // GgaAffx.4023.1.S1_at // Gga.18491.1.S1_s_at // GgaAffx.25789.4.S1_s_at // GgaAffx.25648.2.S1_s_at // GgaAffx.5095.1.S1_at
GO:0007266	P	Rho protein signal transduction	5	456	179	24599	0.24	0.37	// GgaAffx.23641.3.S1_s_at // GgaAffx.789.1.S1_at // GgaAffx.21483.1.S1_at // Gga.6009.1.S1_s_at // GgaAffx.4150.2.S1_s_at
GO:0046578	P	regulation of Ras protein signal transduction	8	456	318	24599	0.24	0.37	// GgaAffx.23641.3.S1_s_at // Gga.5263.3.S1_s_at // GgaAffx.6799.1.S1_s_at // Gga.6009.1.S1_s_at // GgaAffx.21483.1.S1_at // GgaAffx.7879.1.S1_at // GgaAffx.24709.1.S1_s_at // GgaAffx.4150.2.S1_s_at
GO:0044057	P	regulation of system process	7	456	272	24599	0.25	0.37	// GgaAffx.26299.1.S1_s_at // Gga.3864.1.S1_at // GgaAffx.13140.1.S1_at // GgaAffx.1143.1.S1_s_at // GgaAffx.4006.1.S1_at // Gga.51.1.S1_at // Gga.10758.1.S1_at
GO:0009607	P	response to biotic stimulus	5	456	181	24599	0.25	0.37	// GgaAffx.4249.1.S1_x_at // Gga.12255.1.S1_s_at // GgaAffx.5951.1.S1_s_at // Gga.6936.1.A1_at // Gga.13140.1.S1_s_at
GO:0042325	P	regulation of phosphorylation	9	456	368	24599	0.25	0.37	// Gga.9347.3.S1_a_at // Gga.3864.1.S1_at // GgaAffx.23028.1.S1_s_at // GgaAffx.10350.1.S1_at // GgaAffx.26684.1.S1_at // Gga.1891.1.S1_at // GgaAffx.2648.1.S1_s_at // Gga.2908.1.S1_at // GgaAffx.22685.1.S1_at
GO:0007389	P	pattern specification process	8	456	321	24599	0.25	0.37	// Gga.3864.1.S1_at // Gga.345.1.S1_at // GgaAffx.25545.1.S1_at // GgaAffx.25609.2.S1_s_at // GgaAffx.25609.1.S1_at // GgaAffx.24100.1.S1_s_at // GgaAffx.10949.1.S1_s_at // GgaAffx.5095.1.S1_at
GO:0043009	P	chordate embryonic development	7	456	277	24599	0.26	0.38	// GgaAffx.25609.1.S1_at // Gga.3864.1.S1_at // GgaAffx.25609.2.S1_s_at // GgaAffx.22594.1.S1_s_at // Gga.345.1.S1_at // GgaAffx.10949.1.S1_s_at // GgaAffx.5095.1.S1_at
GO:0001558	P	regulation of cell growth	5	456	185	24599	0.26	0.39	// GgaAffx.23988.1.S1_at // Gga.1742.1.S1_a_at // GgaAffx.2055.1.S1_s_at // Gga.502.1.S1_at // Gga.6009.1.S1_s_at
GO:0009792	P	embryonic development ending in birth or egg hatching	7	456	280	24599	0.27	0.4	// GgaAffx.25609.1.S1_at // Gga.3864.1.S1_at // GgaAffx.25609.2.S1_s_at // GgaAffx.22594.1.S1_s_at // Gga.345.1.S1_at // GgaAffx.10949.1.S1_s_at // GgaAffx.5095.1.S1_at
GO:0019220	P	regulation of phosphate metabolic process	9	456	377	24599	0.27	0.4	// Gga.9347.3.S1_a_at // Gga.3864.1.S1_at // GgaAffx.23028.1.S1_s_at // GgaAffx.10350.1.S1_at // GgaAffx.26684.1.S1_at // Gga.1891.1.S1_at // GgaAffx.2648.1.S1_s_at // Gga.2908.1.S1_at // GgaAffx.22685.1.S1_at
GO:0051174	P	regulation of phosphorus metabolic process	9	456	377	24599	0.27	0.4	// Gga.9347.3.S1_a_at // Gga.3864.1.S1_at // GgaAffx.23028.1.S1_s_at // GgaAffx.10350.1.S1_at // GgaAffx.26684.1.S1_at // Gga.1891.1.S1_at // GgaAffx.2648.1.S1_s_at // Gga.2908.1.S1_at // GgaAffx.22685.1.S1_at
GO:0040007	P	growth	11	456	474	24599	0.27	0.4	// GgaAffx.7407.1.S1_s_at // Gga.3864.1.S1_at // Gga.345.1.S1_at // Gga.1742.1.S1_a_at // GgaAffx.2055.1.S1_s_at // GgaAffx.24844.1.S1_at // Gga.6009.1.S1_s_at // GgaAffx.23988.1.S1_at // Gga.502.1.S1_at // GgaAffx.20978.1.S1_s_at // Gga.19791.1.S1_s_at
GO:0030003	P	cellular cation homeostasis	6	456	235	24599	0.27	0.4	// GgaAffx.9516.1.S1_at // Gga.9347.3.S1_a_at // Gga.3864.1.S1_at // GgaAffx.24196.1.S1_s_at // Gga.7556.1.S1_at // Gga.3286.1.S1_at
GO:0009165	P	nucleotide biosynthetic process	6	456	239	24599	0.29	0.42	// GgaAffx.21393.1.S1_s_at // GgaAffx.9422.2.S1_s_at // GgaAffx.10526.2.S1_s_at // GgaAffx.7522.1.S1_s_at // GgaAffx.22730.1.S1_at // GgaAffx.10104.2.S1_s_at
GO:0006570	P	tyrosine metabolic process	5	456	193	24599	0.29	0.42	// GgaAffx.24127.1.S1_at // Gga.4425.1.S1_at // GgaAffx.23111.1.S1_s_at // GgaAffx.681.3.S1_s_at // GgaAffx.21140.1.S1_s_at
GO:0007242	P	intracellular signaling cascade	40	456	1949	24599	0.29	0.42	// GgaAffx.23641.3.S1_s_at // GgaAffx.5994.1.S1_at // Gga.5263.3.S1_s_at // Gga.6009.1.S1_s_at // GgaAffx.4150.2.S1_s_at // Gga.2908.1.S1_at // GgaAffx.9516.1.S1_at // GgaAffx.26684.1.S1_at // GgaAffx.23149.2.S1_s_at // GgaAffx.23149.1.S1_at // GgaAffx.6799.1.S1_s_at // GgaAffx.25247.1.S1_at // Gga.4119.1.S1_at // Gga.2509.1.S1_at // GgaAffx.21483.1.S1_at // GgaAffx.7522.1.S1_s_at // GgaAffx.549.…
GO:0006164	P	purine nucleotide biosynthetic process	5	456	193	24599	0.29	0.42	// GgaAffx.7522.1.S1_s_at // GgaAffx.9422.2.S1_s_at // GgaAffx.21393.1.S1_s_at // GgaAffx.10526.2.S1_s_at // GgaAffx.10104.2.S1_s_at
GO:0043087	P	regulation of GTPase activity	9	456	385	24599	0.29	0.42	// GgaAffx.23641.3.S1_s_at // GgaAffx.6799.1.S1_s_at // Gga.5263.3.S1_s_at // Gga.6009.1.S1_s_at // GgaAffx.21483.1.S1_at // GgaAffx.7879.1.S1_at // GgaAffx.26615.2.S1_s_at // GgaAffx.24709.1.S1_s_at // GgaAffx.4150.2.S1_s_at
GO:0006917	P	induction of apoptosis	5	456	196	24599	0.3	0.43	// GgaAffx.5618.1.S1_at // GgaAffx.9649.1.S1_at // Gga.8774.1.S1_s_at // Gga.345.1.S1_at // GgaAffx.23789.1.S1_at
GO:0022610	P	biological adhesion	20	456	938	24599	0.3	0.43	// Gga.2967.1.S1_at // GgaAffx.6430.1.S1_at // GgaAffx.2055.1.S1_s_at // Gga.4722.1.S1_s_at // GgaAffx.10417.7.S1_s_at // Gga.10479.1.S1_s_at // Gga.11150.1.S1_s_at // GgaAffx.10012.1.S1_at // GgaAffx.9793.1.S1_at // GgaAffx.2298.1.S1_at // GgaAffx.9629.1.S1_at // GgaAffx.1143.1.S1_s_at // GgaAffx.24100.1.S1_s_at // GgaAffx.8655.1.S1_s_at // Gga.4048.1.S1_at // GgaAffx.23361.1.S1_at // GgaAffx.23…
GO:0007155	P	cell adhesion	20	456	938	24599	0.3	0.43	// Gga.2967.1.S1_at // GgaAffx.6430.1.S1_at // GgaAffx.2055.1.S1_s_at // Gga.4722.1.S1_s_at // GgaAffx.10417.7.S1_s_at // Gga.10479.1.S1_s_at // Gga.11150.1.S1_s_at // GgaAffx.10012.1.S1_at // GgaAffx.9793.1.S1_at // GgaAffx.2298.1.S1_at // GgaAffx.9629.1.S1_at // GgaAffx.1143.1.S1_s_at // GgaAffx.24100.1.S1_s_at // GgaAffx.8655.1.S1_s_at // Gga.4048.1.S1_at // GgaAffx.23361.1.S1_at // GgaAffx.23…
GO:0030154	P	cell differentiation	31	456	1500	24599	0.3	0.43	// Gga.4909.2.S1_s_at // GgaAffx.23641.3.S1_s_at // GgaAffx.25037.1.S1_at // GgaAffx.1852.2.S1_s_at // GgaAffx.26777.1.S1_s_at // GgaAffx.10012.1.S1_at // GgaAffx.26299.1.S1_s_at // GgaAffx.24000.2.S1_s_at // Gga.11132.1.S1_at // Gga.2908.1.S1_at // GgaAffx.5095.1.S1_at // Gga.4722.1.S1_s_at // GgaAffx.22855.1.S1_at // Gga.7320.1.S1_s_at // Gga.345.1.S1_at // GgaAffx.24000.1.S1_s_at // Gga.1742.1…
GO:0012502	P	induction of programmed cell death	5	456	197	24599	0.3	0.43	// GgaAffx.5618.1.S1_at // GgaAffx.9649.1.S1_at // Gga.8774.1.S1_s_at // Gga.345.1.S1_at // GgaAffx.23789.1.S1_at
GO:0016477	P	cell migration	8	456	342	24599	0.31	0.43	// Gga.2967.1.S1_at // Gga.3864.1.S1_at // GgaAffx.23988.2.S1_s_at // GgaAffx.25609.2.S1_s_at // GgaAffx.25609.1.S1_at // Gga.345.1.S1_at // Gga.11132.1.S1_at // Gga.10758.1.S1_at
GO:0006886	P	intracellular protein transport	11	456	491	24599	0.31	0.44	// GgaAffx.2648.1.S1_s_at // Gga.16527.1.S1_at // GgaAffx.25679.1.S1_s_at // GgaAffx.26038.1.S1_at // Gga.345.1.S1_at // Gga.2044.3.S1_a_at // Gga.6118.1.S1_at // Gga.11343.1.S1_at // Gga.10758.1.S1_at // GgaAffx.25648.2.S1_s_at // GgaAffx.8944.1.S1_s_at
GO:0048583	P	regulation of response to stimulus	6	456	247	24599	0.31	0.44	// GgaAffx.9516.1.S1_at // Gga.3864.1.S1_at // GgaAffx.23988.2.S1_s_at // Gga.6936.1.A1_at // GgaAffx.10350.1.S1_at // GgaAffx.26684.1.S1_at
GO:0030001	P	metal ion transport	18	456	845	24599	0.31	0.44	// GgaAffx.7796.1.S1_s_at // Gga.19274.1.S1_s_at // GgaAffx.9792.1.S1_at // GgaAffx.10239.1.A1_at // GgaAffx.23508.1.S1_at // GgaAffx.4023.1.S1_at // Gga.10147.1.S1_at // GgaAffx.23789.1.S1_at // Gga.11950.1.S1_s_at // GgaAffx.8655.1.S1_s_at // Gga.267.1.S1_at // GgaAffx.10239.1.S1_at // GgaAffx.6107.1.S1_s_at // Gga.11487.1.S1_s_at // GgaAffx.4006.1.S1_at // GgaAffx.198.1.S1_at // GgaAffx.2648.1…
GO:0009888	P	tissue development	15	456	696	24599	0.32	0.45	// GgaAffx.7407.1.S1_s_at // GgaAffx.5951.1.S1_s_at // Gga.3864.1.S1_at // GgaAffx.24000.1.S1_s_at // GgaAffx.26684.1.S1_at // GgaAffx.10012.1.S1_at // GgaAffx.25609.2.S1_s_at // GgaAffx.25609.1.S1_at // Gga.345.1.S1_at // GgaAffx.24000.2.S1_s_at // Gga.4006.2.S1_a_at // Gga.1891.1.S1_at // GgaAffx.20978.1.S1_s_at // Gga.2908.1.S1_at // GgaAffx.5095.1.S1_at
GO:0022607	P	cellular component assembly	17	456	798	24599	0.32	0.45	// Gga.4722.1.S1_s_at // Gga.2967.1.S1_at // Gga.12255.1.S1_s_at // GgaAffx.882.2.S1_s_at // GgaAffx.5630.9.S1_s_at // Gga.3864.1.S1_at // GgaAffx.25247.1.S1_at // GgaAffx.26038.1.S1_at // GgaAffx.25609.1.S1_at // GgaAffx.318.1.S1_at // GgaAffx.26684.1.S1_at // GgaAffx.23988.1.S1_at // GgaAffx.1279.2.S1_s_at // Gga.6118.1.S1_at // GgaAffx.25609.2.S1_s_at // GgaAffx.25648.2.S1_s_at // Gga.637.1.S1…
GO:0032879	P	regulation of localization	9	456	398	24599	0.32	0.45	// GgaAffx.23988.2.S1_s_at // GgaAffx.20100.1.S1_at // GgaAffx.25609.2.S1_s_at // GgaAffx.25609.1.S1_at // Gga.345.1.S1_at // GgaAffx.4006.1.S1_at // GgaAffx.4023.1.S1_at // GgaAffx.2648.1.S1_s_at // Gga.637.1.S1_at
GO:0044265	P	cellular macromolecule catabolic process	10	456	451	24599	0.33	0.46	// Gga.4909.2.S1_s_at // GgaAffx.25875.1.S1_s_at // Gga.3864.1.S1_at // GgaAffx.6799.1.S1_s_at // GgaAffx.24934.1.S1_s_at // GgaAffx.6314.1.S1_s_at // Gga.345.1.S1_at // Gga.19278.1.S1_s_at // Gga.7556.1.S1_at // Gga.4119.1.S1_at
GO:0050790	P	regulation of catalytic activity	19	456	910	24599	0.34	0.47	// Gga.9347.3.S1_a_at // GgaAffx.23028.1.S1_s_at // GgaAffx.23641.3.S1_s_at // Gga.3864.1.S1_at // GgaAffx.6799.1.S1_s_at // GgaAffx.9422.2.S1_s_at // Gga.5263.3.S1_s_at // Gga.6009.1.S1_s_at // GgaAffx.10350.1.S1_at // Gga.2509.1.S1_at // GgaAffx.26684.1.S1_at // GgaAffx.21483.1.S1_at // GgaAffx.7879.1.S1_at // Gga.1891.1.S1_at // GgaAffx.24196.1.S1_s_at // GgaAffx.26615.2.S1_s_at // GgaAffx.247…
GO:0030182	P	neuron differentiation	11	456	504	24599	0.34	0.47	// GgaAffx.22855.1.S1_at // GgaAffx.26299.1.S1_s_at // GgaAffx.23641.3.S1_s_at // GgaAffx.25037.1.S1_at // Gga.345.1.S1_at // GgaAffx.12155.1.S1_s_at // GgaAffx.26684.1.S1_at // GgaAffx.24100.1.S1_s_at // GgaAffx.1279.2.S1_s_at // Gga.2908.1.S1_at // Gga.3864.1.S1_at
GO:0045859	P	regulation of protein kinase activity	7	456	306	24599	0.34	0.47	// Gga.9347.3.S1_a_at // Gga.3864.1.S1_at // GgaAffx.23028.1.S1_s_at // GgaAffx.10350.1.S1_at // GgaAffx.26684.1.S1_at // Gga.1891.1.S1_at // GgaAffx.22685.1.S1_at
GO:0034613	P	cellular protein localization	11	456	506	24599	0.34	0.47	// GgaAffx.2648.1.S1_s_at // Gga.16527.1.S1_at // GgaAffx.25679.1.S1_s_at // GgaAffx.26038.1.S1_at // Gga.345.1.S1_at // Gga.2044.3.S1_a_at // Gga.6118.1.S1_at // Gga.11343.1.S1_at // Gga.10758.1.S1_at // GgaAffx.25648.2.S1_s_at // GgaAffx.8944.1.S1_s_at
GO:0042981	P	regulation of apoptosis	12	456	556	24599	0.34	0.47	// GgaAffx.9649.1.S1_at // Gga.4722.1.S1_s_at // GgaAffx.23789.1.S1_at // GgaAffx.5618.1.S1_at // GgaAffx.24934.1.S1_s_at // GgaAffx.7313.1.S1_at // Gga.345.1.S1_at // GgaAffx.7315.1.S1_at // Gga.8774.1.S1_s_at // Gga.7254.2.S1_a_at // Gga.2908.1.S1_at // Gga.3864.1.S1_at
GO:0043067	P	regulation of programmed cell death	12	456	560	24599	0.35	0.48	// GgaAffx.9649.1.S1_at // Gga.4722.1.S1_s_at // GgaAffx.23789.1.S1_at // GgaAffx.5618.1.S1_at // GgaAffx.24934.1.S1_s_at // GgaAffx.7313.1.S1_at // Gga.345.1.S1_at // GgaAffx.7315.1.S1_at // Gga.8774.1.S1_s_at // Gga.7254.2.S1_a_at // Gga.2908.1.S1_at // Gga.3864.1.S1_at
GO:0006508	P	proteolysis	18	456	867	24599	0.35	0.48	// Gga.4909.2.S1_s_at // Gga.6487.1.S1_at // Gga.3864.1.S1_at // Gga.2166.1.S1_at // Gga.4152.1.S1_s_at // GgaAffx.4249.1.S1_x_at // GgaAffx.20285.1.S1_s_at // GgaAffx.24934.1.S1_s_at // Gga.2166.3.S1_a_at // Gga.8230.1.S1_at // GgaAffx.26520.1.S1_s_at // GgaAffx.6799.1.S1_s_at // GgaAffx.10294.6.S1_s_at // GgaAffx.5618.1.S1_at // Gga.10895.1.S1_s_at // Gga.7556.1.S1_at // GgaAffx.7758.2.S1_s_at …
GO:0070727	P	cellular macromolecule localization	11	456	510	24599	0.35	0.48	// GgaAffx.2648.1.S1_s_at // Gga.16527.1.S1_at // GgaAffx.25679.1.S1_s_at // GgaAffx.26038.1.S1_at // Gga.345.1.S1_at // Gga.2044.3.S1_a_at // Gga.6118.1.S1_at // Gga.11343.1.S1_at // Gga.10758.1.S1_at // GgaAffx.25648.2.S1_s_at // GgaAffx.8944.1.S1_s_at
GO:0010941	P	regulation of cell death	12	456	560	24599	0.35	0.48	// GgaAffx.9649.1.S1_at // Gga.4722.1.S1_s_at // GgaAffx.23789.1.S1_at // GgaAffx.5618.1.S1_at // GgaAffx.24934.1.S1_s_at // GgaAffx.7313.1.S1_at // Gga.345.1.S1_at // GgaAffx.7315.1.S1_at // Gga.8774.1.S1_s_at // Gga.7254.2.S1_a_at // Gga.2908.1.S1_at // Gga.3864.1.S1_at
GO:0040011	P	locomotion	10	456	460	24599	0.35	0.48	// Gga.2967.1.S1_at // Gga.3864.1.S1_at // GgaAffx.23988.2.S1_s_at // GgaAffx.25609.2.S1_s_at // GgaAffx.25609.1.S1_at // Gga.345.1.S1_at // Gga.13691.1.S1_at // Gga.11132.1.S1_at // Gga.7556.1.S1_at // Gga.10758.1.S1_at
GO:0022603	P	regulation of anatomical structure morphogenesis	5	456	211	24599	0.36	0.48	// GgaAffx.26299.1.S1_s_at // Gga.12043.2.S1_a_at // Gga.3864.1.S1_at // GgaAffx.25247.1.S1_at // Gga.12043.1.S1_at
GO:0016049	P	cell growth	5	456	211	24599	0.36	0.48	// GgaAffx.23988.1.S1_at // Gga.1742.1.S1_a_at // GgaAffx.2055.1.S1_s_at // Gga.502.1.S1_at // Gga.6009.1.S1_s_at
GO:0048646	P	anatomical structure formation involved in morphogenesis	9	456	415	24599	0.37	0.49	// GgaAffx.26610.2.S1_s_at // Gga.3864.1.S1_at // Gga.345.1.S1_at // Gga.458.1.S1_s_at // GgaAffx.25609.2.S1_s_at // GgaAffx.25609.1.S1_at // GgaAffx.24100.1.S1_s_at // GgaAffx.20978.1.S1_s_at // Gga.10758.1.S1_at
GO:0031324	P	negative regulation of cellular metabolic process	12	456	568	24599	0.37	0.49	// GgaAffx.7407.1.S1_s_at // GgaAffx.22432.1.S1_at // GgaAffx.25545.1.S1_at // GgaAffx.24934.1.S1_s_at // Gga.345.1.S1_at // GgaAffx.2639.1.S1_at // Gga.18491.1.S1_s_at // GgaAffx.2648.1.S1_s_at // GgaAffx.25789.4.S1_s_at // GgaAffx.25648.2.S1_s_at // GgaAffx.5095.1.S1_at // Gga.3864.1.S1_at
GO:0050789	P	regulation of biological process	140	456	7289	24599	0.37	0.49	// GgaAffx.23641.3.S1_s_at // GgaAffx.26777.1.S1_s_at // GgaAffx.20192.1.S1_s_at // GgaAffx.6391.2.S1_s_at // GgaAffx.25247.1.S1_at // Gga.2908.1.S1_at // GgaAffx.5095.1.S1_at // GgaAffx.25609.1.S1_at // GgaAffx.23149.2.S1_s_at // Gga.7320.1.S1_s_at // Gga.1742.1.S1_a_at // GgaAffx.5630.9.S1_s_at // GgaAffx.4059.1.S1_s_at // GgaAffx.26299.1.S1_s_at // Gga.4315.3.S1_a_at // GgaAffx.7131.1.S1_at //…
GO:0051056	P	regulation of small GTPase mediated signal transduction	9	456	417	24599	0.37	0.49	// GgaAffx.23641.3.S1_s_at // GgaAffx.23564.2.S1_s_at // Gga.5263.3.S1_s_at // Gga.6009.1.S1_s_at // GgaAffx.21483.1.S1_at // GgaAffx.7879.1.S1_at // GgaAffx.24709.1.S1_s_at // GgaAffx.6799.1.S1_s_at // GgaAffx.4150.2.S1_s_at
GO:0048870	P	cell motility	8	456	366	24599	0.37	0.49	// Gga.2967.1.S1_at // Gga.3864.1.S1_at // GgaAffx.23988.2.S1_s_at // GgaAffx.25609.2.S1_s_at // GgaAffx.25609.1.S1_at // Gga.345.1.S1_at // Gga.11132.1.S1_at // Gga.10758.1.S1_at
GO:0008361	P	regulation of cell size	5	456	217	24599	0.38	0.5	// GgaAffx.23988.1.S1_at // Gga.1742.1.S1_a_at // GgaAffx.2055.1.S1_s_at // Gga.502.1.S1_at // Gga.6009.1.S1_s_at
GO:0043549	P	regulation of kinase activity	7	456	317	24599	0.38	0.5	// Gga.9347.3.S1_a_at // Gga.3864.1.S1_at // GgaAffx.23028.1.S1_s_at // GgaAffx.10350.1.S1_at // GgaAffx.26684.1.S1_at // Gga.1891.1.S1_at // GgaAffx.22685.1.S1_at
GO:0030005	P	cellular di-, tri-valent inorganic cation homeostasis	5	456	217	24599	0.38	0.5	// GgaAffx.24196.1.S1_s_at // Gga.9347.3.S1_a_at // GgaAffx.9516.1.S1_at // Gga.3864.1.S1_at // Gga.3286.1.S1_at
GO:0051338	P	regulation of transferase activity	7	456	318	24599	0.38	0.5	// Gga.9347.3.S1_a_at // Gga.3864.1.S1_at // GgaAffx.23028.1.S1_s_at // GgaAffx.10350.1.S1_at // GgaAffx.26684.1.S1_at // Gga.1891.1.S1_at // GgaAffx.22685.1.S1_at
GO:0000279	P	M phase	7	456	320	24599	0.38	0.5	// GgaAffx.24462.1.S1_at // GgaAffx.6430.1.S1_at // GgaAffx.1012.1.S1_at // GgaAffx.318.1.S1_at // Gga.502.1.S1_at // GgaAffx.20285.1.S1_s_at // GgaAffx.23988.1.S1_at
GO:0016044	P	cellular membrane organization	7	456	320	24599	0.38	0.5	// GgaAffx.10564.2.S1_s_at // GgaAffx.24844.1.S1_at // Gga.3635.1.S1_at // GgaAffx.20285.1.S1_s_at // GgaAffx.1279.2.S1_s_at // Gga.19791.1.S1_s_at // Gga.11343.1.S1_at
GO:0032268	P	regulation of cellular protein metabolic process	10	456	474	24599	0.39	0.5	// GgaAffx.2648.1.S1_s_at // Gga.3864.1.S1_at // Gga.345.1.S1_at // GgaAffx.24934.1.S1_s_at // Gga.2908.1.S1_at // GgaAffx.26684.1.S1_at // GgaAffx.25060.1.S1_at // Gga.7556.1.S1_at // GgaAffx.7758.2.S1_s_at // GgaAffx.10350.1.S1_at
GO:0055066	P	di-, tri-valent inorganic cation homeostasis	5	456	220	24599	0.39	0.5	// GgaAffx.24196.1.S1_s_at // Gga.9347.3.S1_a_at // GgaAffx.9516.1.S1_at // Gga.3864.1.S1_at // Gga.3286.1.S1_at
GO:0007283	P	spermatogenesis	5	456	221	24599	0.39	0.5	// Gga.4909.2.S1_s_at // GgaAffx.4249.1.S1_x_at // GgaAffx.1433.3.S1_s_at // Gga.7320.1.S1_s_at // GgaAffx.26777.1.S1_s_at
GO:0048232	P	male gamete generation	5	456	221	24599	0.39	0.5	// Gga.4909.2.S1_s_at // GgaAffx.4249.1.S1_x_at // GgaAffx.1433.3.S1_s_at // Gga.7320.1.S1_s_at // GgaAffx.26777.1.S1_s_at
GO:0006163	P	purine nucleotide metabolic process	5	456	221	24599	0.39	0.5	// GgaAffx.7522.1.S1_s_at // GgaAffx.9422.2.S1_s_at // GgaAffx.21393.1.S1_s_at // GgaAffx.10526.2.S1_s_at // GgaAffx.10104.2.S1_s_at
GO:0007049	P	cell cycle	17	456	840	24599	0.4	0.51	// GgaAffx.24462.1.S1_at // GgaAffx.6430.1.S1_at // GgaAffx.9514.1.S1_at // GgaAffx.9649.1.S1_at // GgaAffx.23789.1.S1_at // GgaAffx.22454.1.S1_s_at // GgaAffx.23971.1.S1_at // GgaAffx.1012.1.S1_at // GgaAffx.10417.7.S1_s_at // GgaAffx.318.1.S1_at // GgaAffx.6391.2.S1_s_at // GgaAffx.549.1.S1_at // GgaAffx.20285.1.S1_s_at // GgaAffx.23988.1.S1_at // Gga.502.1.S1_at // GgaAffx.2648.1.S1_s_at // Gg…
GO:0000278	P	mitotic cell cycle	7	456	324	24599	0.4	0.51	// GgaAffx.24462.1.S1_at // GgaAffx.6430.1.S1_at // GgaAffx.1012.1.S1_at // Gga.502.1.S1_at // GgaAffx.20285.1.S1_s_at // GgaAffx.23988.1.S1_at // GgaAffx.2648.1.S1_s_at
GO:0009611	P	response to wounding	9	456	428	24599	0.4	0.51	// GgaAffx.9516.1.S1_at // GgaAffx.5951.1.S1_s_at // GgaAffx.24000.1.S1_s_at // Gga.6936.1.A1_at // Gga.16586.1.S1_at // Gga.2509.1.S1_at // Gga.345.1.S1_at // GgaAffx.2639.1.S1_at // GgaAffx.25183.1.S1_at
GO:0048523	P	negative regulation of cellular process	27	456	1371	24599	0.41	0.52	// Gga.4722.1.S1_s_at // GgaAffx.5630.9.S1_s_at // GgaAffx.10012.1.S1_at // GgaAffx.2055.1.S1_s_at // GgaAffx.6391.2.S1_s_at // GgaAffx.4023.1.S1_at // Gga.18491.1.S1_s_at // GgaAffx.25789.4.S1_s_at // Gga.2908.1.S1_at // GgaAffx.5095.1.S1_at // GgaAffx.10968.1.S1_at // Gga.1742.1.S1_a_at // Gga.345.1.S1_at // GgaAffx.2648.1.S1_s_at // GgaAffx.10968.2.S1_s_at // GgaAffx.7407.1.S1_s_at // GgaAffx.…
GO:0051336	P	regulation of hydrolase activity	11	456	536	24599	0.41	0.52	// GgaAffx.23641.3.S1_s_at // GgaAffx.6799.1.S1_s_at // Gga.5263.3.S1_s_at // Gga.6009.1.S1_s_at // Gga.2509.1.S1_at // GgaAffx.21483.1.S1_at // GgaAffx.7879.1.S1_at // GgaAffx.24196.1.S1_s_at // GgaAffx.26615.2.S1_s_at // GgaAffx.24709.1.S1_s_at // GgaAffx.4150.2.S1_s_at
GO:0006950	P	response to stress	28	456	1435	24599	0.42	0.54	// GgaAffx.4590.1.S1_at // GgaAffx.26777.1.S1_s_at // GgaAffx.4249.1.S1_x_at // Gga.6936.1.A1_at // GgaAffx.1528.1.S1_at // Gga.7797.1.S1_s_at // GgaAffx.21433.1.S1_s_at // GgaAffx.9516.1.S1_at // GgaAffx.26684.1.S1_at // Gga.7254.2.S1_a_at // GgaAffx.24000.1.S1_s_at // GgaAffx.25114.1.S1_at // Gga.2509.1.S1_at // Gga.345.1.S1_at // Gga.2087.1.S1_s_at // GgaAffx.549.1.S1_at // Gga.4006.2.S1_a_at …
GO:0090066	P	regulation of anatomical structure size	7	456	334	24599	0.43	0.54	// GgaAffx.5630.9.S1_s_at // Gga.1742.1.S1_a_at // GgaAffx.2055.1.S1_s_at // GgaAffx.24934.1.S1_s_at // Gga.6009.1.S1_s_at // Gga.502.1.S1_at // GgaAffx.23988.1.S1_at
GO:0007186	P	G-protein coupled receptor protein signaling pathway	15	456	754	24599	0.43	0.54	// GgaAffx.9310.1.S1_s_at // GgaAffx.9516.1.S1_at // GgaAffx.23149.2.S1_s_at // GgaAffx.23149.1.S1_at // GgaAffx.23988.2.S1_s_at // Gga.11493.2.S1_s_at // GgaAffx.9422.2.S1_s_at // GgaAffx.22707.1.S1_at // Gga.2509.1.S1_at // GgaAffx.3976.1.S1_at // GgaAffx.22707.2.S1_s_at // GgaAffx.24196.1.S1_s_at // GgaAffx.3929.1.S1_at // Gga.10758.1.S1_at // GgaAffx.26048.1.S1_at
GO:0032535	P	regulation of cellular component size	6	456	283	24599	0.43	0.54	// GgaAffx.5630.9.S1_s_at // Gga.1742.1.S1_a_at // GgaAffx.2055.1.S1_s_at // Gga.6009.1.S1_s_at // Gga.502.1.S1_at // GgaAffx.23988.1.S1_at
GO:0050794	P	regulation of cellular process	134	456	7086	24599	0.44	0.55	// GgaAffx.23641.3.S1_s_at // GgaAffx.26777.1.S1_s_at // GgaAffx.20192.1.S1_s_at // GgaAffx.6391.2.S1_s_at // GgaAffx.25247.1.S1_at // Gga.2908.1.S1_at // GgaAffx.5095.1.S1_at // GgaAffx.26684.1.S1_at // GgaAffx.23149.2.S1_s_at // Gga.7320.1.S1_s_at // Gga.1742.1.S1_a_at // GgaAffx.5630.9.S1_s_at // GgaAffx.4059.1.S1_s_at // GgaAffx.26299.1.S1_s_at // Gga.4315.3.S1_a_at // GgaAffx.7131.1.S1_at //…
GO:0022403	P	cell cycle phase	8	456	390	24599	0.44	0.55	// GgaAffx.24462.1.S1_at // GgaAffx.6430.1.S1_at // GgaAffx.9649.1.S1_at // GgaAffx.1012.1.S1_at // GgaAffx.318.1.S1_at // Gga.502.1.S1_at // GgaAffx.20285.1.S1_s_at // GgaAffx.23988.1.S1_at
GO:0016481	P	negative regulation of transcription	8	456	390	24599	0.44	0.55	// GgaAffx.7407.1.S1_s_at // GgaAffx.22432.1.S1_at // GgaAffx.25545.1.S1_at // GgaAffx.24934.1.S1_s_at // Gga.18491.1.S1_s_at // GgaAffx.25789.4.S1_s_at // GgaAffx.25648.2.S1_s_at // GgaAffx.5095.1.S1_at
GO:0010558	P	negative regulation of macromolecule biosynthetic process	9	456	443	24599	0.44	0.55	// GgaAffx.7407.1.S1_s_at // GgaAffx.22432.1.S1_at // GgaAffx.25545.1.S1_at // GgaAffx.24934.1.S1_s_at // GgaAffx.2639.1.S1_at // Gga.18491.1.S1_s_at // GgaAffx.25789.4.S1_s_at // GgaAffx.25648.2.S1_s_at // GgaAffx.5095.1.S1_at
GO:0048468	P	cell development	17	456	866	24599	0.44	0.55	// GgaAffx.22855.1.S1_at // GgaAffx.7407.1.S1_s_at // GgaAffx.26299.1.S1_s_at // GgaAffx.23641.3.S1_s_at // GgaAffx.25037.1.S1_at // Gga.4909.2.S1_s_at // GgaAffx.10012.1.S1_at // Gga.3864.1.S1_at // GgaAffx.1143.1.S1_s_at // GgaAffx.26684.1.S1_at // GgaAffx.24100.1.S1_s_at // Gga.345.1.S1_at // GgaAffx.20978.1.S1_s_at // GgaAffx.1279.2.S1_s_at // GgaAffx.12155.1.S1_s_at // GgaAffx.5095.1.S1_at /…
GO:0048519	P	negative regulation of biological process	28	456	1454	24599	0.45	0.56	// Gga.4722.1.S1_s_at // GgaAffx.5630.9.S1_s_at // GgaAffx.10012.1.S1_at // GgaAffx.2055.1.S1_s_at // Gga.6936.1.A1_at // GgaAffx.6391.2.S1_s_at // GgaAffx.4023.1.S1_at // Gga.18491.1.S1_s_at // GgaAffx.25789.4.S1_s_at // Gga.2908.1.S1_at // GgaAffx.5095.1.S1_at // GgaAffx.10968.1.S1_at // Gga.1742.1.S1_a_at // Gga.345.1.S1_at // GgaAffx.2648.1.S1_s_at // GgaAffx.10968.2.S1_s_at // GgaAffx.7407.1…
GO:0051239	P	regulation of multicellular organismal process	14	456	713	24599	0.45	0.56	// GgaAffx.9516.1.S1_at // GgaAffx.26299.1.S1_s_at // GgaAffx.13140.1.S1_at // GgaAffx.23641.3.S1_s_at // Gga.4722.1.S1_s_at // GgaAffx.9422.2.S1_s_at // GgaAffx.1143.1.S1_s_at // Gga.345.1.S1_at // GgaAffx.2639.1.S1_at // GgaAffx.4006.1.S1_at // Gga.51.1.S1_at // GgaAffx.20978.1.S1_s_at // Gga.10758.1.S1_at // Gga.3864.1.S1_at
GO:0044249	P	cellular biosynthetic process	78	456	4139	24599	0.47	0.57	// GgaAffx.916.1.S1_at // Gga.4909.2.S1_s_at // Gga.16586.1.S1_at // Gga.14480.1.S1_at // GgaAffx.193.1.S1_at // GgaAffx.23089.1.S1_s_at // GgaAffx.7967.1.S1_at // GgaAffx.1241.1.S1_at // Gga.4425.1.S1_at // GgaAffx.2639.1.S1_at // Gga.19278.1.S1_s_at // GgaAffx.1433.3.S1_s_at // Gga.8312.3.S1_at // GgaAffx.10949.1.S1_s_at // Gga.18491.1.S1_s_at // GgaAffx.25875.1.S1_s_at // GgaAffx.25789.4.S1_s_…
GO:0009605	P	response to external stimulus	14	456	722	24599	0.47	0.58	// GgaAffx.9310.1.S1_s_at // GgaAffx.9516.1.S1_at // GgaAffx.5951.1.S1_s_at // Gga.3864.1.S1_at // GgaAffx.24000.1.S1_s_at // Gga.6936.1.A1_at // Gga.16586.1.S1_at // Gga.2509.1.S1_at // Gga.345.1.S1_at // GgaAffx.2639.1.S1_at // Gga.51.1.S1_at // GgaAffx.21825.1.S1_s_at // Gga.13691.1.S1_at // GgaAffx.25183.1.S1_at
GO:0007399	P	nervous system development	21	456	1096	24599	0.47	0.58	// GgaAffx.22855.1.S1_at // Gga.9347.3.S1_a_at // GgaAffx.26299.1.S1_s_at // GgaAffx.5951.1.S1_s_at // GgaAffx.23641.3.S1_s_at // GgaAffx.25037.1.S1_at // Gga.7186.2.S1_a_at // GgaAffx.12155.1.S1_s_at // Gga.3864.1.S1_at // GgaAffx.1143.1.S1_s_at // Gga.2908.1.S1_at // GgaAffx.25609.1.S1_at // GgaAffx.24100.1.S1_s_at // Gga.345.1.S1_at // GgaAffx.26684.1.S1_at // GgaAffx.10949.1.S1_s_at // Gga.11…
GO:0051246	P	regulation of protein metabolic process	10	456	510	24599	0.47	0.58	// GgaAffx.2648.1.S1_s_at // Gga.3864.1.S1_at // Gga.345.1.S1_at // GgaAffx.24934.1.S1_s_at // Gga.2908.1.S1_at // GgaAffx.26684.1.S1_at // GgaAffx.25060.1.S1_at // Gga.7556.1.S1_at // GgaAffx.7758.2.S1_s_at // GgaAffx.10350.1.S1_at
GO:0031327	P	negative regulation of cellular biosynthetic process	9	456	460	24599	0.48	0.59	// GgaAffx.7407.1.S1_s_at // GgaAffx.22432.1.S1_at // GgaAffx.25545.1.S1_at // GgaAffx.24934.1.S1_s_at // GgaAffx.2639.1.S1_at // Gga.18491.1.S1_s_at // GgaAffx.25789.4.S1_s_at // GgaAffx.25648.2.S1_s_at // GgaAffx.5095.1.S1_at
GO:0009890	P	negative regulation of biosynthetic process	9	456	463	24599	0.49	0.6	// GgaAffx.7407.1.S1_s_at // GgaAffx.22432.1.S1_at // GgaAffx.25545.1.S1_at // GgaAffx.24934.1.S1_s_at // GgaAffx.2639.1.S1_at // Gga.18491.1.S1_s_at // GgaAffx.25789.4.S1_s_at // GgaAffx.25648.2.S1_s_at // GgaAffx.5095.1.S1_at
GO:0009887	P	organ morphogenesis	14	456	735	24599	0.5	0.61	// Gga.2967.1.S1_at // GgaAffx.26299.1.S1_s_at // GgaAffx.25037.1.S1_at // Gga.1891.1.S1_at // GgaAffx.5008.1.S1_at // GgaAffx.25609.2.S1_s_at // GgaAffx.25609.1.S1_at // Gga.345.1.S1_at // GgaAffx.10949.1.S1_s_at // GgaAffx.20978.1.S1_s_at // GgaAffx.1279.2.S1_s_at // Gga.2908.1.S1_at // GgaAffx.5095.1.S1_at // Gga.3864.1.S1_at
GO:0048731	P	system development	43	456	2300	24599	0.5	0.61	// Gga.2967.1.S1_at // Gga.9347.3.S1_a_at // GgaAffx.23641.3.S1_s_at // GgaAffx.25037.1.S1_at // GgaAffx.13099.1.S1_at // GgaAffx.10012.1.S1_at // GgaAffx.25609.2.S1_s_at // GgaAffx.22594.1.S1_s_at // GgaAffx.24000.2.S1_s_at // GgaAffx.10949.1.S1_s_at // Gga.11132.1.S1_at // GgaAffx.26220.2.S1_s_at // GgaAffx.5095.1.S1_at // Gga.4722.1.S1_s_at // GgaAffx.22855.1.S1_at // GgaAffx.26684.1.S1_at // …
GO:0006954	P	inflammatory response	5	456	252	24599	0.5	0.61	// GgaAffx.2639.1.S1_at // GgaAffx.5951.1.S1_s_at // Gga.6936.1.A1_at // GgaAffx.25183.1.S1_at // Gga.16586.1.S1_at
GO:0045944	P	positive regulation of transcription from RNA polymerase II promoter	5	456	252	24599	0.5	0.61	// Gga.345.1.S1_at // GgaAffx.5951.1.S1_s_at // GgaAffx.2648.1.S1_s_at // Gga.4006.2.S1_a_at // GgaAffx.5095.1.S1_at
GO:0007268	P	synaptic transmission	9	456	470	24599	0.51	0.61	// GgaAffx.26299.1.S1_s_at // GgaAffx.24899.1.S1_s_at // GgaAffx.24899.1.S1_at // GgaAffx.1143.1.S1_s_at // Gga.19278.1.S1_s_at // Gga.51.1.S1_at // GgaAffx.25875.1.S1_s_at // Gga.10758.1.S1_at // Gga.3864.1.S1_at
GO:0007423	P	sensory organ development	5	456	257	24599	0.52	0.62	// GgaAffx.20978.1.S1_s_at // GgaAffx.1279.2.S1_s_at // GgaAffx.25037.1.S1_at // Gga.345.1.S1_at // Gga.2908.1.S1_at
GO:0051049	P	regulation of transport	5	456	261	24599	0.53	0.64	// GgaAffx.20100.1.S1_at // GgaAffx.2648.1.S1_s_at // GgaAffx.4006.1.S1_at // GgaAffx.4023.1.S1_at // Gga.345.1.S1_at
GO:0022402	P	cell cycle process	9	456	480	24599	0.53	0.64	// GgaAffx.24462.1.S1_at // GgaAffx.6430.1.S1_at // GgaAffx.9649.1.S1_at // GgaAffx.10417.7.S1_s_at // GgaAffx.1012.1.S1_at // GgaAffx.318.1.S1_at // Gga.502.1.S1_at // GgaAffx.20285.1.S1_s_at // GgaAffx.23988.1.S1_at
GO:0045934	P	negative regulation of nucleobase, nucleoside, nucleotide and nucleic acid metabolic process	8	456	426	24599	0.54	0.64	// GgaAffx.7407.1.S1_s_at // GgaAffx.22432.1.S1_at // GgaAffx.25545.1.S1_at // GgaAffx.24934.1.S1_s_at // Gga.18491.1.S1_s_at // GgaAffx.25789.4.S1_s_at // GgaAffx.25648.2.S1_s_at // GgaAffx.5095.1.S1_at
GO:0045892	P	negative regulation of transcription, DNA-dependent	5	456	265	24599	0.55	0.65	// GgaAffx.7407.1.S1_s_at // GgaAffx.25648.2.S1_s_at // GgaAffx.25545.1.S1_at // GgaAffx.22432.1.S1_at // GgaAffx.5095.1.S1_at
GO:0007610	P	behavior	8	456	433	24599	0.55	0.65	// Gga.9347.3.S1_a_at // GgaAffx.26299.1.S1_s_at // Gga.3864.1.S1_at // GgaAffx.20100.1.S1_at // Gga.16450.1.S1_at // Gga.51.1.S1_at // Gga.13691.1.S1_at // Gga.7556.1.S1_at
GO:0048513	P	organ development	31	456	1693	24599	0.55	0.65	// Gga.2967.1.S1_at // Gga.9347.3.S1_a_at // GgaAffx.25037.1.S1_at // GgaAffx.10012.1.S1_at // GgaAffx.25609.2.S1_s_at // GgaAffx.22594.1.S1_s_at // GgaAffx.24000.2.S1_s_at // GgaAffx.10949.1.S1_s_at // Gga.2908.1.S1_at // GgaAffx.5095.1.S1_at // GgaAffx.26684.1.S1_at // Gga.345.1.S1_at // GgaAffx.24000.1.S1_s_at // GgaAffx.25609.1.S1_at // GgaAffx.24100.1.S1_s_at // Gga.4006.2.S1_a_at // GgaAffx…
GO:0051253	P	negative regulation of RNA metabolic process	5	456	267	24599	0.55	0.65	// GgaAffx.7407.1.S1_s_at // GgaAffx.25648.2.S1_s_at // GgaAffx.25545.1.S1_at // GgaAffx.22432.1.S1_at // GgaAffx.5095.1.S1_at
GO:0051172	P	negative regulation of nitrogen compound metabolic process	8	456	432	24599	0.55	0.65	// GgaAffx.7407.1.S1_s_at // GgaAffx.22432.1.S1_at // GgaAffx.25545.1.S1_at // GgaAffx.24934.1.S1_s_at // Gga.18491.1.S1_s_at // GgaAffx.25789.4.S1_s_at // GgaAffx.25648.2.S1_s_at // GgaAffx.5095.1.S1_at
GO:0006461	P	protein complex assembly	8	456	444	24599	0.58	0.68	// Gga.12255.1.S1_s_at // GgaAffx.882.2.S1_s_at // GgaAffx.5630.9.S1_s_at // GgaAffx.26038.1.S1_at // GgaAffx.26684.1.S1_at // GgaAffx.318.1.S1_at // Gga.6118.1.S1_at // GgaAffx.25648.2.S1_s_at
GO:0070271	P	protein complex biogenesis	8	456	444	24599	0.58	0.68	// Gga.12255.1.S1_s_at // GgaAffx.882.2.S1_s_at // GgaAffx.5630.9.S1_s_at // GgaAffx.26038.1.S1_at // GgaAffx.26684.1.S1_at // GgaAffx.318.1.S1_at // Gga.6118.1.S1_at // GgaAffx.25648.2.S1_s_at
GO:0022414	P	reproductive process	11	456	615	24599	0.59	0.69	// Gga.4909.2.S1_s_at // Gga.9347.3.S1_a_at // GgaAffx.25037.1.S1_at // Gga.7320.1.S1_s_at // GgaAffx.26777.1.S1_s_at // GgaAffx.4249.1.S1_x_at // GgaAffx.318.1.S1_at // GgaAffx.5541.1.S1_at // GgaAffx.1433.3.S1_s_at // GgaAffx.7407.1.S1_s_at // Gga.345.1.S1_at
GO:0000003	P	reproduction	11	456	625	24599	0.61	0.71	// Gga.4909.2.S1_s_at // Gga.9347.3.S1_a_at // GgaAffx.25037.1.S1_at // Gga.7320.1.S1_s_at // GgaAffx.26777.1.S1_s_at // GgaAffx.4249.1.S1_x_at // GgaAffx.318.1.S1_at // GgaAffx.5541.1.S1_at // GgaAffx.1433.3.S1_s_at // GgaAffx.7407.1.S1_s_at // Gga.345.1.S1_at
GO:0007276	P	gamete generation	5	456	287	24599	0.62	0.71	// Gga.4909.2.S1_s_at // GgaAffx.4249.1.S1_x_at // GgaAffx.1433.3.S1_s_at // Gga.7320.1.S1_s_at // GgaAffx.26777.1.S1_s_at
GO:0044093	P	positive regulation of molecular function	7	456	402	24599	0.62	0.71	// GgaAffx.26684.1.S1_at // Gga.3864.1.S1_at // GgaAffx.9422.2.S1_s_at // Gga.2509.1.S1_at // Gga.345.1.S1_at // Gga.502.1.S1_at // GgaAffx.24196.1.S1_s_at
GO:0019226	P	transmission of nerve impulse	9	456	514	24599	0.61	0.71	// GgaAffx.26299.1.S1_s_at // GgaAffx.24899.1.S1_s_at // GgaAffx.24899.1.S1_at // GgaAffx.1143.1.S1_s_at // Gga.19278.1.S1_s_at // Gga.51.1.S1_at // GgaAffx.25875.1.S1_s_at // Gga.10758.1.S1_at // Gga.3864.1.S1_at
GO:0042127	P	regulation of cell proliferation	10	456	571	24599	0.62	0.71	// GgaAffx.10968.1.S1_at // GgaAffx.9514.1.S1_at // GgaAffx.5951.1.S1_s_at // Gga.4722.1.S1_s_at // Gga.345.1.S1_at // GgaAffx.318.1.S1_at // GgaAffx.20978.1.S1_s_at // GgaAffx.2648.1.S1_s_at // Gga.2908.1.S1_at // GgaAffx.10968.2.S1_s_at
GO:0007420	P	brain development	5	456	287	24599	0.62	0.71	// Gga.9347.3.S1_a_at // GgaAffx.5951.1.S1_s_at // Gga.2908.1.S1_at // Gga.345.1.S1_at // Gga.3864.1.S1_at
GO:0043170	P	macromolecule metabolic process	120	456	6662	24599	0.63	0.72	// GgaAffx.23641.3.S1_s_at // GgaAffx.20192.1.S1_s_at // GgaAffx.1528.1.S1_at // Gga.19278.1.S1_s_at // Gga.2908.1.S1_at // GgaAffx.5095.1.S1_at // GgaAffx.9403.1.S1_s_at // GgaAffx.26684.1.S1_at // GgaAffx.681.3.S1_s_at // GgaAffx.24000.1.S1_s_at // GgaAffx.20285.1.S1_s_at // GgaAffx.26288.1.S1_s_at // GgaAffx.24459.2.S1_s_at // GgaAffx.26299.1.S1_s_at // Gga.6487.1.S1_at // GgaAffx.882.2.S1_s_a…
GO:0008283	P	cell proliferation	16	456	924	24599	0.64	0.74	// GgaAffx.10968.1.S1_at // Gga.345.1.S1_at // GgaAffx.9514.1.S1_at // GgaAffx.5951.1.S1_s_at // Gga.4722.1.S1_s_at // GgaAffx.26777.1.S1_s_at // GgaAffx.25545.1.S1_at // Gga.1742.1.S1_a_at // Gga.3864.1.S1_at // GgaAffx.318.1.S1_at // GgaAffx.23971.1.S1_at // GgaAffx.20978.1.S1_s_at // Gga.10895.1.S1_s_at // GgaAffx.2648.1.S1_s_at // Gga.2908.1.S1_at // GgaAffx.10968.2.S1_s_at
GO:0008219	P	cell death	14	456	829	24599	0.67	0.77	// GgaAffx.9649.1.S1_at // Gga.4722.1.S1_s_at // GgaAffx.23789.1.S1_at // GgaAffx.5618.1.S1_at // GgaAffx.24934.1.S1_s_at // GgaAffx.7313.1.S1_at // GgaAffx.25183.1.S1_at // GgaAffx.26684.1.S1_at // Gga.345.1.S1_at // GgaAffx.7315.1.S1_at // Gga.8774.1.S1_s_at // Gga.7254.2.S1_a_at // Gga.2908.1.S1_at // Gga.3864.1.S1_at
GO:0033554	P	cellular response to stress	8	456	483	24599	0.67	0.77	// Gga.3864.1.S1_at // GgaAffx.26777.1.S1_s_at // GgaAffx.10350.1.S1_at // GgaAffx.26684.1.S1_at // Gga.2087.1.S1_s_at // GgaAffx.318.1.S1_at // Gga.7797.1.S1_s_at // GgaAffx.25183.1.S1_at
GO:0051726	P	regulation of cell cycle	6	456	365	24599	0.67	0.77	// GgaAffx.24462.1.S1_at // GgaAffx.6430.1.S1_at // GgaAffx.9514.1.S1_at // GgaAffx.1012.1.S1_at // GgaAffx.6391.2.S1_s_at // GgaAffx.2648.1.S1_s_at
GO:0016265	P	death	14	456	829	24599	0.67	0.77	// GgaAffx.9649.1.S1_at // Gga.4722.1.S1_s_at // GgaAffx.23789.1.S1_at // GgaAffx.5618.1.S1_at // GgaAffx.24934.1.S1_s_at // GgaAffx.7313.1.S1_at // GgaAffx.25183.1.S1_at // GgaAffx.26684.1.S1_at // Gga.345.1.S1_at // GgaAffx.7315.1.S1_at // Gga.8774.1.S1_s_at // Gga.7254.2.S1_a_at // Gga.2908.1.S1_at // Gga.3864.1.S1_at
GO:0007165	P	signal transduction	75	456	4261	24599	0.68	0.77	// Gga.9347.3.S1_a_at // GgaAffx.9793.1.S1_at // GgaAffx.23641.3.S1_s_at // Gga.4722.1.S1_s_at // GgaAffx.5994.1.S1_at // GgaAffx.4657.1.S1_s_at // GgaAffx.10012.1.S1_at // GgaAffx.25545.1.S1_at // Gga.5263.3.S1_s_at // Gga.6009.1.S1_s_at // Gga.19791.1.S1_s_at // GgaAffx.2639.1.S1_at // GgaAffx.23971.1.S1_at // Gga.2908.1.S1_at // GgaAffx.10564.2.S1_s_at // GgaAffx.4150.2.S1_s_at // GgaAffx.6154…
GO:0006915	P	apoptosis	13	456	776	24599	0.68	0.77	// GgaAffx.9649.1.S1_at // Gga.4722.1.S1_s_at // GgaAffx.23789.1.S1_at // GgaAffx.5618.1.S1_at // GgaAffx.24934.1.S1_s_at // GgaAffx.7313.1.S1_at // GgaAffx.26684.1.S1_at // Gga.345.1.S1_at // GgaAffx.7315.1.S1_at // Gga.8774.1.S1_s_at // Gga.7254.2.S1_a_at // Gga.2908.1.S1_at // Gga.3864.1.S1_at
GO:0012501	P	programmed cell death	13	456	784	24599	0.69	0.78	// GgaAffx.9649.1.S1_at // Gga.4722.1.S1_s_at // GgaAffx.23789.1.S1_at // GgaAffx.5618.1.S1_at // GgaAffx.24934.1.S1_s_at // GgaAffx.7313.1.S1_at // GgaAffx.26684.1.S1_at // Gga.345.1.S1_at // GgaAffx.7315.1.S1_at // Gga.8774.1.S1_s_at // Gga.7254.2.S1_a_at // Gga.2908.1.S1_at // Gga.3864.1.S1_at
GO:0006955	P	immune response	7	456	443	24599	0.71	0.8	// Gga.3864.1.S1_at // GgaAffx.23988.2.S1_s_at // GgaAffx.9422.2.S1_s_at // Gga.6936.1.A1_at // GgaAffx.2639.1.S1_at // Gga.8774.1.S1_s_at // GgaAffx.7522.1.S1_s_at
GO:0019953	P	sexual reproduction	5	456	330	24599	0.73	0.82	// Gga.4909.2.S1_s_at // GgaAffx.4249.1.S1_x_at // GgaAffx.1433.3.S1_s_at // Gga.7320.1.S1_s_at // GgaAffx.26777.1.S1_s_at
GO:0045893	P	positive regulation of transcription, DNA-dependent	5	456	334	24599	0.74	0.83	// Gga.345.1.S1_at // GgaAffx.5951.1.S1_s_at // GgaAffx.2648.1.S1_s_at // Gga.4006.2.S1_a_at // GgaAffx.5095.1.S1_at
GO:0051254	P	positive regulation of RNA metabolic process	5	456	336	24599	0.75	0.84	// Gga.345.1.S1_at // GgaAffx.5951.1.S1_s_at // GgaAffx.2648.1.S1_s_at // Gga.4006.2.S1_a_at // GgaAffx.5095.1.S1_at
GO:0019932	P	second-messenger-mediated signaling	8	456	527	24599	0.76	0.85	// GgaAffx.9516.1.S1_at // GgaAffx.23149.2.S1_s_at // GgaAffx.23149.1.S1_at // GgaAffx.9422.2.S1_s_at // Gga.2509.1.S1_at // GgaAffx.7879.1.S1_at // GgaAffx.24196.1.S1_s_at // GgaAffx.23494.1.S1_s_at
GO:0051674	P	localization of cell	8	456	531	24599	0.77	0.85	// Gga.2967.1.S1_at // Gga.3864.1.S1_at // GgaAffx.23988.2.S1_s_at // GgaAffx.25609.2.S1_s_at // GgaAffx.25609.1.S1_at // Gga.345.1.S1_at // Gga.11132.1.S1_at // Gga.10758.1.S1_at
GO:0044085	P	cellular component biogenesis	17	456	1074	24599	0.77	0.86	// Gga.4722.1.S1_s_at // Gga.2967.1.S1_at // Gga.12255.1.S1_s_at // GgaAffx.882.2.S1_s_at // GgaAffx.5630.9.S1_s_at // Gga.3864.1.S1_at // GgaAffx.25247.1.S1_at // GgaAffx.26038.1.S1_at // GgaAffx.25609.1.S1_at // GgaAffx.318.1.S1_at // GgaAffx.26684.1.S1_at // GgaAffx.23988.1.S1_at // GgaAffx.1279.2.S1_s_at // Gga.6118.1.S1_at // GgaAffx.25609.2.S1_s_at // GgaAffx.25648.2.S1_s_at // Gga.637.1.S1…
GO:0007187	P	G-protein signaling, coupled to cyclic nucleotide second messenger	6	456	429	24599	0.81	0.89	// GgaAffx.9516.1.S1_at // GgaAffx.23149.2.S1_s_at // GgaAffx.23149.1.S1_at // GgaAffx.9422.2.S1_s_at // Gga.2509.1.S1_at // GgaAffx.24196.1.S1_s_at
GO:0050793	P	regulation of developmental process	15	456	984	24599	0.81	0.89	// GgaAffx.20531.1.S1_s_at // GgaAffx.26299.1.S1_s_at // GgaAffx.25677.1.S1_s_at // Gga.12043.2.S1_a_at // Gga.4722.1.S1_s_at // GgaAffx.1852.2.S1_s_at // GgaAffx.9422.2.S1_s_at // Gga.12043.1.S1_at // GgaAffx.1143.1.S1_s_at // Gga.345.1.S1_at // GgaAffx.25247.1.S1_at // GgaAffx.20978.1.S1_s_at // GgaAffx.23641.3.S1_s_at // Gga.2908.1.S1_at // Gga.3864.1.S1_at
GO:0048522	P	positive regulation of cellular process	21	456	1352	24599	0.82	0.9	// Gga.2967.1.S1_at // Gga.345.1.S1_at // GgaAffx.26299.1.S1_s_at // GgaAffx.5951.1.S1_s_at // Gga.4722.1.S1_s_at // GgaAffx.23988.2.S1_s_at // GgaAffx.5618.1.S1_at // GgaAffx.23789.1.S1_at // GgaAffx.24934.1.S1_s_at // GgaAffx.6400.2.S1_s_at // GgaAffx.1143.1.S1_s_at // GgaAffx.9649.1.S1_at // GgaAffx.2648.1.S1_s_at // Gga.7556.1.S1_at // Gga.4006.2.S1_a_at // GgaAffx.20978.1.S1_s_at // Gga.8774…
GO:0065003	P	macromolecular complex assembly	8	456	562	24599	0.82	0.9	// Gga.12255.1.S1_s_at // GgaAffx.882.2.S1_s_at // GgaAffx.5630.9.S1_s_at // GgaAffx.26038.1.S1_at // GgaAffx.26684.1.S1_at // GgaAffx.318.1.S1_at // Gga.6118.1.S1_at // GgaAffx.25648.2.S1_s_at
GO:0043085	P	positive regulation of catalytic activity	5	456	369	24599	0.81	0.9	// GgaAffx.24196.1.S1_s_at // Gga.2509.1.S1_at // GgaAffx.9422.2.S1_s_at // Gga.3864.1.S1_at // GgaAffx.26684.1.S1_at
GO:0044260	P	cellular macromolecule metabolic process	99	456	5891	24599	0.83	0.91	// GgaAffx.23641.3.S1_s_at // GgaAffx.20192.1.S1_s_at // GgaAffx.1528.1.S1_at // Gga.19278.1.S1_s_at // Gga.2908.1.S1_at // GgaAffx.5095.1.S1_at // GgaAffx.9403.1.S1_s_at // GgaAffx.681.3.S1_s_at // GgaAffx.24000.1.S1_s_at // GgaAffx.26288.1.S1_s_at // GgaAffx.26299.1.S1_s_at // GgaAffx.882.2.S1_s_at // Gga.4315.3.S1_a_at // GgaAffx.6430.1.S1_at // Gga.10147.1.S1_at // GgaAffx.542.1.S1_at // Gga.…
GO:0010604	P	positive regulation of macromolecule metabolic process	9	456	634	24599	0.83	0.91	// GgaAffx.5951.1.S1_s_at // Gga.3864.1.S1_at // GgaAffx.2648.1.S1_s_at // GgaAffx.24934.1.S1_s_at // Gga.345.1.S1_at // Gga.4006.2.S1_a_at // Gga.7556.1.S1_at // Gga.2908.1.S1_at // GgaAffx.5095.1.S1_at
GO:0019935	P	cyclic-nucleotide-mediated signaling	6	456	446	24599	0.83	0.91	// GgaAffx.9516.1.S1_at // GgaAffx.23149.2.S1_s_at // GgaAffx.23149.1.S1_at // GgaAffx.9422.2.S1_s_at // Gga.2509.1.S1_at // GgaAffx.24196.1.S1_s_at
GO:0002376	P	immune system process	10	456	703	24599	0.84	0.91	// Gga.2967.1.S1_at // GgaAffx.5951.1.S1_s_at // Gga.3864.1.S1_at // GgaAffx.23988.2.S1_s_at // GgaAffx.9422.2.S1_s_at // Gga.6936.1.A1_at // Gga.345.1.S1_at // GgaAffx.2639.1.S1_at // Gga.8774.1.S1_s_at // GgaAffx.7522.1.S1_s_at
GO:0010468	P	regulation of gene expression	37	456	2333	24599	0.84	0.92	// Gga.14480.1.S1_at // GgaAffx.7967.1.S1_at // GgaAffx.25609.2.S1_s_at // GgaAffx.2639.1.S1_at // GgaAffx.4023.1.S1_at // GgaAffx.10949.1.S1_s_at // Gga.18491.1.S1_s_at // GgaAffx.25789.4.S1_s_at // GgaAffx.5095.1.S1_at // GgaAffx.193.1.S1_at // Gga.12255.1.S1_s_at // Gga.4048.1.S1_at // GgaAffx.25609.1.S1_at // Gga.345.1.S1_at // Gga.4006.2.S1_a_at // Gga.710.6.S1_a_at // GgaAffx.2648.1.S1_s_at…
GO:0006357	P	regulation of transcription from RNA polymerase II promoter	8	456	591	24599	0.85	0.93	// GgaAffx.7407.1.S1_s_at // GgaAffx.5951.1.S1_s_at // GgaAffx.22432.1.S1_at // GgaAffx.25545.1.S1_at // Gga.345.1.S1_at // Gga.4006.2.S1_a_at // GgaAffx.2648.1.S1_s_at // GgaAffx.5095.1.S1_at
GO:0009059	P	macromolecule biosynthetic process	55	456	3408	24599	0.85	0.93	// GgaAffx.916.1.S1_at // Gga.16586.1.S1_at // Gga.14480.1.S1_at // GgaAffx.193.1.S1_at // GgaAffx.7967.1.S1_at // GgaAffx.2639.1.S1_at // GgaAffx.2648.1.S1_s_at // GgaAffx.10949.1.S1_s_at // Gga.18491.1.S1_s_at // GgaAffx.25789.4.S1_s_at // GgaAffx.5095.1.S1_at // GgaAffx.882.2.S1_s_at // Gga.12255.1.S1_s_at // Gga.16371.1.S1_s_at // Gga.6085.3.S1_a_at // Gga.4048.1.S1_at // Gga.345.1.S1_at // G…
GO:0006952	P	defense response	7	456	531	24599	0.86	0.93	// GgaAffx.5951.1.S1_s_at // GgaAffx.4249.1.S1_x_at // Gga.6936.1.A1_at // GgaAffx.25114.1.S1_at // Gga.16586.1.S1_at // GgaAffx.2639.1.S1_at // GgaAffx.25183.1.S1_at
GO:0048518	P	positive regulation of biological process	22	456	1473	24599	0.87	0.93	// Gga.2967.1.S1_at // Gga.4722.1.S1_s_at // GgaAffx.23988.2.S1_s_at // Gga.7556.1.S1_at // Gga.2908.1.S1_at // GgaAffx.5095.1.S1_at // GgaAffx.1143.1.S1_s_at // Gga.345.1.S1_at // Gga.4006.2.S1_a_at // GgaAffx.2648.1.S1_s_at // GgaAffx.7407.1.S1_s_at // GgaAffx.26299.1.S1_s_at // GgaAffx.23789.1.S1_at // GgaAffx.9649.1.S1_at // Gga.8774.1.S1_s_at // GgaAffx.20978.1.S1_s_at // Gga.7254.2.S1_a_at …
GO:0031325	P	positive regulation of cellular metabolic process	9	456	667	24599	0.87	0.93	// GgaAffx.5951.1.S1_s_at // Gga.3864.1.S1_at // GgaAffx.2648.1.S1_s_at // GgaAffx.24934.1.S1_s_at // Gga.345.1.S1_at // Gga.4006.2.S1_a_at // Gga.7556.1.S1_at // Gga.2908.1.S1_at // GgaAffx.5095.1.S1_at
GO:0034621	P	cellular macromolecular complex subunit organization	6	456	475	24599	0.87	0.94	// Gga.12255.1.S1_s_at // GgaAffx.882.2.S1_s_at // GgaAffx.5630.9.S1_s_at // GgaAffx.26038.1.S1_at // GgaAffx.26684.1.S1_at // GgaAffx.2648.1.S1_s_at
GO:0007417	P	central nervous system development	5	456	407	24599	0.87	0.94	// Gga.9347.3.S1_a_at // GgaAffx.5951.1.S1_s_at // Gga.2908.1.S1_at // Gga.345.1.S1_at // Gga.3864.1.S1_at
GO:0009893	P	positive regulation of metabolic process	9	456	679	24599	0.88	0.94	// GgaAffx.5951.1.S1_s_at // Gga.3864.1.S1_at // GgaAffx.2648.1.S1_s_at // GgaAffx.24934.1.S1_s_at // Gga.345.1.S1_at // Gga.4006.2.S1_a_at // Gga.7556.1.S1_at // Gga.2908.1.S1_at // GgaAffx.5095.1.S1_at
GO:0019222	P	regulation of metabolic process	48	456	3060	24599	0.88	0.94	// Gga.9347.3.S1_a_at // GgaAffx.25545.1.S1_at // Gga.14480.1.S1_at // GgaAffx.7967.1.S1_at // GgaAffx.25609.2.S1_s_at // GgaAffx.2639.1.S1_at // GgaAffx.4023.1.S1_at // GgaAffx.10949.1.S1_s_at // Gga.18491.1.S1_s_at // Gga.7556.1.S1_at // GgaAffx.25789.4.S1_s_at // Gga.2908.1.S1_at // GgaAffx.5095.1.S1_at // GgaAffx.193.1.S1_at // GgaAffx.26684.1.S1_at // Gga.12255.1.S1_s_at // GgaAffx.22685.1.S…
GO:0060255	P	regulation of macromolecule metabolic process	42	456	2704	24599	0.88	0.94	// Gga.14480.1.S1_at // GgaAffx.7967.1.S1_at // GgaAffx.25609.2.S1_s_at // GgaAffx.2639.1.S1_at // GgaAffx.4023.1.S1_at // GgaAffx.10949.1.S1_s_at // Gga.18491.1.S1_s_at // Gga.7556.1.S1_at // GgaAffx.25789.4.S1_s_at // Gga.2908.1.S1_at // GgaAffx.5095.1.S1_at // GgaAffx.193.1.S1_at // GgaAffx.26684.1.S1_at // Gga.12255.1.S1_s_at // Gga.4048.1.S1_at // GgaAffx.25609.1.S1_at // Gga.345.1.S1_at // …
GO:0043933	P	macromolecular complex subunit organization	9	456	714	24599	0.91	0.97	// Gga.12255.1.S1_s_at // GgaAffx.882.2.S1_s_at // GgaAffx.5630.9.S1_s_at // GgaAffx.26038.1.S1_at // GgaAffx.26684.1.S1_at // GgaAffx.318.1.S1_at // Gga.6118.1.S1_at // GgaAffx.2648.1.S1_s_at // GgaAffx.25648.2.S1_s_at
GO:0051094	P	positive regulation of developmental process	5	456	442	24599	0.91	0.97	// GgaAffx.20978.1.S1_s_at // Gga.345.1.S1_at // GgaAffx.26299.1.S1_s_at // Gga.2908.1.S1_at // GgaAffx.1143.1.S1_s_at
GO:0006412	P	translation	5	456	445	24599	0.91	0.97	// GgaAffx.1433.3.S1_s_at // GgaAffx.25060.1.S1_at // GgaAffx.2639.1.S1_at // GgaAffx.7758.2.S1_s_at // Gga.12996.1.S1_at
GO:0006139	P	nucleobase, nucleoside, nucleotide and nucleic acid metabolic process	59	456	3813	24599	0.92	0.97	// Gga.14480.1.S1_at // GgaAffx.1852.2.S1_s_at // GgaAffx.26777.1.S1_s_at // Gga.14395.1.S1_s_at // GgaAffx.7967.1.S1_at // GgaAffx.9792.1.S1_at // GgaAffx.1241.1.S1_at // GgaAffx.1433.3.S1_s_at // GgaAffx.2639.1.S1_at // GgaAffx.4023.1.S1_at // GgaAffx.10949.1.S1_s_at // Gga.18491.1.S1_s_at // GgaAffx.25789.4.S1_s_at // GgaAffx.6314.1.S1_s_at // GgaAffx.5095.1.S1_at // GgaAffx.193.1.S1_at // Gga…
GO:0006350	P	transcription	33	456	2254	24599	0.92	0.97	// Gga.14480.1.S1_at // GgaAffx.7967.1.S1_at // GgaAffx.2639.1.S1_at // GgaAffx.10949.1.S1_s_at // Gga.18491.1.S1_s_at // GgaAffx.25789.4.S1_s_at // GgaAffx.5095.1.S1_at // GgaAffx.193.1.S1_at // Gga.12255.1.S1_s_at // Gga.4048.1.S1_at // Gga.345.1.S1_at // Gga.4006.2.S1_a_at // Gga.710.6.S1_a_at // GgaAffx.2648.1.S1_s_at // Gga.13140.1.S1_s_at // GgaAffx.4984.2.S1_s_at // GgaAffx.7407.1.S1_s_at …
GO:0045449	P	regulation of transcription	31	456	2142	24599	0.93	0.98	// Gga.14480.1.S1_at // GgaAffx.7967.1.S1_at // GgaAffx.2639.1.S1_at // GgaAffx.10949.1.S1_s_at // Gga.18491.1.S1_s_at // GgaAffx.25789.4.S1_s_at // GgaAffx.5095.1.S1_at // GgaAffx.193.1.S1_at // Gga.12255.1.S1_s_at // Gga.4048.1.S1_at // Gga.345.1.S1_at // Gga.4006.2.S1_a_at // Gga.710.6.S1_a_at // GgaAffx.2648.1.S1_s_at // GgaAffx.4984.2.S1_s_at // GgaAffx.7407.1.S1_s_at // Gga.721.1.S1_at // G…
GO:0006366	P	transcription from RNA polymerase II promoter	8	456	680	24599	0.93	0.98	// GgaAffx.7407.1.S1_s_at // GgaAffx.5951.1.S1_s_at // GgaAffx.22432.1.S1_at // GgaAffx.25545.1.S1_at // Gga.345.1.S1_at // Gga.4006.2.S1_a_at // GgaAffx.2648.1.S1_s_at // GgaAffx.5095.1.S1_at
GO:0031323	P	regulation of cellular metabolic process	44	456	2968	24599	0.94	0.98	// Gga.9347.3.S1_a_at // GgaAffx.25545.1.S1_at // Gga.14480.1.S1_at // GgaAffx.7967.1.S1_at // GgaAffx.2639.1.S1_at // GgaAffx.10949.1.S1_s_at // Gga.18491.1.S1_s_at // Gga.7556.1.S1_at // GgaAffx.25789.4.S1_s_at // Gga.2908.1.S1_at // GgaAffx.5095.1.S1_at // GgaAffx.193.1.S1_at // Gga.12255.1.S1_s_at // GgaAffx.22685.1.S1_at // Gga.4048.1.S1_at // GgaAffx.26684.1.S1_at // Gga.345.1.S1_at // Gga.…
GO:0010556	P	regulation of macromolecule biosynthetic process	33	456	2333	24599	0.95	0.99	// Gga.14480.1.S1_at // GgaAffx.7967.1.S1_at // GgaAffx.2639.1.S1_at // GgaAffx.10949.1.S1_s_at // Gga.18491.1.S1_s_at // GgaAffx.25789.4.S1_s_at // GgaAffx.5095.1.S1_at // GgaAffx.193.1.S1_at // Gga.12255.1.S1_s_at // Gga.4048.1.S1_at // Gga.345.1.S1_at // Gga.4006.2.S1_a_at // Gga.710.6.S1_a_at // GgaAffx.2648.1.S1_s_at // GgaAffx.4984.2.S1_s_at // GgaAffx.7407.1.S1_s_at // Gga.721.1.S1_at // G…
GO:0080090	P	regulation of primary metabolic process	40	456	2770	24599	0.95	0.99	// Gga.14480.1.S1_at // GgaAffx.7967.1.S1_at // GgaAffx.2639.1.S1_at // GgaAffx.10949.1.S1_s_at // Gga.18491.1.S1_s_at // Gga.7556.1.S1_at // GgaAffx.25789.4.S1_s_at // Gga.2908.1.S1_at // GgaAffx.5095.1.S1_at // GgaAffx.193.1.S1_at // Gga.12255.1.S1_s_at // Gga.4048.1.S1_at // GgaAffx.26684.1.S1_at // Gga.345.1.S1_at // Gga.4006.2.S1_a_at // Gga.710.6.S1_a_at // GgaAffx.2648.1.S1_s_at // GgaAffx…
GO:0034645	P	cellular macromolecule biosynthetic process	48	456	3269	24599	0.95	0.99	// GgaAffx.916.1.S1_at // Gga.14480.1.S1_at // GgaAffx.193.1.S1_at // GgaAffx.7967.1.S1_at // GgaAffx.2639.1.S1_at // GgaAffx.10949.1.S1_s_at // Gga.18491.1.S1_s_at // GgaAffx.25789.4.S1_s_at // GgaAffx.5095.1.S1_at // GgaAffx.882.2.S1_s_at // Gga.12255.1.S1_s_at // Gga.16371.1.S1_s_at // Gga.4048.1.S1_at // Gga.345.1.S1_at // Gga.4006.2.S1_a_at // Gga.4485.2.S1_s_at // Gga.710.6.S1_a_at // GgaAf…
GO:0010557	P	positive regulation of macromolecule biosynthetic process	5	456	555	24599	0.98	0.99	// Gga.345.1.S1_at // GgaAffx.5951.1.S1_s_at // GgaAffx.2648.1.S1_s_at // Gga.4006.2.S1_a_at // GgaAffx.5095.1.S1_at
GO:0019219	P	regulation of nucleobase, nucleoside, nucleotide and nucleic acid metabolic process	32	456	2377	24599	0.97	0.99	// Gga.14480.1.S1_at // GgaAffx.7967.1.S1_at // GgaAffx.2639.1.S1_at // GgaAffx.10949.1.S1_s_at // Gga.18491.1.S1_s_at // GgaAffx.25789.4.S1_s_at // GgaAffx.5095.1.S1_at // GgaAffx.193.1.S1_at // Gga.12255.1.S1_s_at // Gga.4048.1.S1_at // Gga.345.1.S1_at // Gga.4006.2.S1_a_at // Gga.710.6.S1_a_at // GgaAffx.2648.1.S1_s_at // GgaAffx.4984.2.S1_s_at // GgaAffx.7407.1.S1_s_at // Gga.721.1.S1_at // G…
GO:0010628	P	positive regulation of gene expression	5	456	524	24599	0.97	0.99	// Gga.345.1.S1_at // GgaAffx.5951.1.S1_s_at // GgaAffx.2648.1.S1_s_at // Gga.4006.2.S1_a_at // GgaAffx.5095.1.S1_at
GO:0009889	P	regulation of biosynthetic process	34	456	2463	24599	0.96	0.99	// Gga.14480.1.S1_at // GgaAffx.7967.1.S1_at // GgaAffx.2639.1.S1_at // GgaAffx.10949.1.S1_s_at // Gga.18491.1.S1_s_at // GgaAffx.25789.4.S1_s_at // GgaAffx.5095.1.S1_at // GgaAffx.193.1.S1_at // Gga.12255.1.S1_s_at // Gga.4048.1.S1_at // Gga.345.1.S1_at // Gga.4006.2.S1_a_at // Gga.710.6.S1_a_at // GgaAffx.2648.1.S1_s_at // GgaAffx.4984.2.S1_s_at // GgaAffx.7407.1.S1_s_at // Gga.721.1.S1_at // G…
GO:0045935	P	positive regulation of nucleobase, nucleoside, nucleotide and nucleic acid metabolic process	5	456	544	24599	0.97	0.99	// Gga.345.1.S1_at // GgaAffx.5951.1.S1_s_at // GgaAffx.2648.1.S1_s_at // Gga.4006.2.S1_a_at // GgaAffx.5095.1.S1_at
GO:0006351	P	transcription, DNA-dependent	26	456	2008	24599	0.98	0.99	// Gga.14480.1.S1_at // GgaAffx.7967.1.S1_at // GgaAffx.10949.1.S1_s_at // GgaAffx.5095.1.S1_at // GgaAffx.193.1.S1_at // Gga.12255.1.S1_s_at // Gga.345.1.S1_at // Gga.4006.2.S1_a_at // Gga.710.6.S1_a_at // GgaAffx.2648.1.S1_s_at // Gga.13140.1.S1_s_at // GgaAffx.7407.1.S1_s_at // Gga.721.1.S1_at // GgaAffx.22432.1.S1_at // GgaAffx.9243.3.S1_s_at // Gga.11217.1.S1_at // Gga.12996.1.S1_at // Gga.4…
GO:0032774	P	RNA biosynthetic process	26	456	2008	24599	0.98	0.99	// Gga.14480.1.S1_at // GgaAffx.7967.1.S1_at // GgaAffx.10949.1.S1_s_at // GgaAffx.5095.1.S1_at // GgaAffx.193.1.S1_at // Gga.12255.1.S1_s_at // Gga.345.1.S1_at // Gga.4006.2.S1_a_at // Gga.710.6.S1_a_at // GgaAffx.2648.1.S1_s_at // Gga.13140.1.S1_s_at // GgaAffx.7407.1.S1_s_at // Gga.721.1.S1_at // GgaAffx.22432.1.S1_at // GgaAffx.9243.3.S1_s_at // Gga.11217.1.S1_at // Gga.12996.1.S1_at // Gga.4…
GO:0051171	P	regulation of nitrogen compound metabolic process	32	456	2398	24599	0.98	0.99	// Gga.14480.1.S1_at // GgaAffx.7967.1.S1_at // GgaAffx.2639.1.S1_at // GgaAffx.10949.1.S1_s_at // Gga.18491.1.S1_s_at // GgaAffx.25789.4.S1_s_at // GgaAffx.5095.1.S1_at // GgaAffx.193.1.S1_at // Gga.12255.1.S1_s_at // Gga.4048.1.S1_at // Gga.345.1.S1_at // Gga.4006.2.S1_a_at // Gga.710.6.S1_a_at // GgaAffx.2648.1.S1_s_at // GgaAffx.4984.2.S1_s_at // GgaAffx.7407.1.S1_s_at // Gga.721.1.S1_at // G…
GO:0051173	P	positive regulation of nitrogen compound metabolic process	5	456	556	24599	0.98	0.99	// Gga.345.1.S1_at // GgaAffx.5951.1.S1_s_at // GgaAffx.2648.1.S1_s_at // Gga.4006.2.S1_a_at // GgaAffx.5095.1.S1_at
GO:0045941	P	positive regulation of transcription	5	456	522	24599	0.96	0.99	// Gga.345.1.S1_at // GgaAffx.5951.1.S1_s_at // GgaAffx.2648.1.S1_s_at // Gga.4006.2.S1_a_at // GgaAffx.5095.1.S1_at
GO:0031326	P	regulation of cellular biosynthetic process	34	456	2459	24599	0.96	0.99	// Gga.14480.1.S1_at // GgaAffx.7967.1.S1_at // GgaAffx.2639.1.S1_at // GgaAffx.10949.1.S1_s_at // Gga.18491.1.S1_s_at // GgaAffx.25789.4.S1_s_at // GgaAffx.5095.1.S1_at // GgaAffx.193.1.S1_at // Gga.12255.1.S1_s_at // Gga.4048.1.S1_at // Gga.345.1.S1_at // Gga.4006.2.S1_a_at // Gga.710.6.S1_a_at // GgaAffx.2648.1.S1_s_at // GgaAffx.4984.2.S1_s_at // GgaAffx.7407.1.S1_s_at // Gga.721.1.S1_at // G…
GO:0009891	P	positive regulation of biosynthetic process	5	456	579	24599	0.98	0.99	// Gga.345.1.S1_at // GgaAffx.5951.1.S1_s_at // GgaAffx.2648.1.S1_s_at // Gga.4006.2.S1_a_at // GgaAffx.5095.1.S1_at
GO:0006355	P	regulation of transcription, DNA-dependent	24	456	1928	24599	0.98	0.99	// Gga.14480.1.S1_at // GgaAffx.7967.1.S1_at // GgaAffx.10949.1.S1_s_at // GgaAffx.5095.1.S1_at // GgaAffx.193.1.S1_at // Gga.12255.1.S1_s_at // Gga.345.1.S1_at // Gga.4006.2.S1_a_at // Gga.710.6.S1_a_at // GgaAffx.2648.1.S1_s_at // GgaAffx.7407.1.S1_s_at // Gga.721.1.S1_at // GgaAffx.22432.1.S1_at // GgaAffx.9243.3.S1_s_at // Gga.11217.1.S1_at // Gga.4315.3.S1_a_at // GgaAffx.25648.2.S1_s_at // …
GO:0031328	P	positive regulation of cellular biosynthetic process	5	456	579	24599	0.98	0.99	// Gga.345.1.S1_at // GgaAffx.5951.1.S1_s_at // GgaAffx.2648.1.S1_s_at // Gga.4006.2.S1_a_at // GgaAffx.5095.1.S1_at
GO:0009057	P	macromolecule catabolic process	12	456	1141	24599	0.99	0.99	// Gga.4909.2.S1_s_at // GgaAffx.25875.1.S1_s_at // Gga.3864.1.S1_at // GgaAffx.6799.1.S1_s_at // GgaAffx.24934.1.S1_s_at // GgaAffx.6314.1.S1_s_at // Gga.345.1.S1_at // Gga.8411.3.S1_s_at // Gga.19278.1.S1_s_at // GgaAffx.24612.1.S1_at // Gga.7556.1.S1_at // Gga.4119.1.S1_at
GO:0010467	P	gene expression	42	456	3172	24599	0.99	0.99	// Gga.14480.1.S1_at // GgaAffx.20531.1.S1_s_at // GgaAffx.7967.1.S1_at // GgaAffx.25609.2.S1_s_at // GgaAffx.2639.1.S1_at // GgaAffx.4023.1.S1_at // GgaAffx.10949.1.S1_s_at // Gga.18491.1.S1_s_at // GgaAffx.25789.4.S1_s_at // GgaAffx.5095.1.S1_at // GgaAffx.193.1.S1_at // Gga.12255.1.S1_s_at // Gga.4048.1.S1_at // GgaAffx.25609.1.S1_at // Gga.345.1.S1_at // Gga.4006.2.S1_a_at // Gga.710.6.S1_a_a…
GO:0051252	P	regulation of RNA metabolic process	24	456	2021	24599	0.99	1	// Gga.14480.1.S1_at // GgaAffx.7967.1.S1_at // GgaAffx.10949.1.S1_s_at // GgaAffx.5095.1.S1_at // GgaAffx.193.1.S1_at // Gga.12255.1.S1_s_at // Gga.345.1.S1_at // Gga.4006.2.S1_a_at // Gga.710.6.S1_a_at // GgaAffx.2648.1.S1_s_at // GgaAffx.7407.1.S1_s_at // Gga.721.1.S1_at // GgaAffx.22432.1.S1_at // GgaAffx.9243.3.S1_s_at // Gga.11217.1.S1_at // Gga.4315.3.S1_a_at // GgaAffx.25648.2.S1_s_at // …
GO:0016070	P	RNA metabolic process	28	456	2592	24599	1	1	// Gga.14480.1.S1_at // GgaAffx.7407.1.S1_s_at // GgaAffx.7967.1.S1_at // GgaAffx.10949.1.S1_s_at // GgaAffx.5095.1.S1_at // GgaAffx.193.1.S1_at // Gga.12255.1.S1_s_at // Gga.345.1.S1_at // Gga.4006.2.S1_a_at // Gga.710.6.S1_a_at // GgaAffx.2648.1.S1_s_at // Gga.13140.1.S1_s_at // GgaAffx.20531.1.S1_s_at // Gga.721.1.S1_at // GgaAffx.22432.1.S1_at // GgaAffx.9243.3.S1_s_at // Gga.11217.1.S1_at //…
GO:0007154	P	cell communication	40	456	4585	24599	1	1	// Gga.9347.3.S1_a_at // GgaAffx.25545.1.S1_at // GgaAffx.23641.3.S1_s_at // GgaAffx.24899.1.S1_s_at // GgaAffx.24899.1.S1_at // GgaAffx.10012.1.S1_at // Gga.5263.3.S1_s_at // Gga.6009.1.S1_s_at // GgaAffx.2639.1.S1_at // Gga.19278.1.S1_s_at // GgaAffx.4023.1.S1_at // GgaAffx.4150.2.S1_s_at // Gga.2908.1.S1_at // Gga.4722.1.S1_s_at // GgaAffx.22685.1.S1_at // Gga.345.1.S1_at // GgaAffx.6799.1.S1_…
GO:0050662	F	coenzyme binding	21	456	195	24599	2.2e-10	3.5e-08	// Gga.4909.2.S1_s_at // Gga.9596.1.S1_at // GgaAffx.9083.1.S1_at // GgaAffx.26483.1.S1_s_at // GgaAffx.4468.1.S1_at // Gga.7320.1.S1_s_at // Gga.1132.1.S1_at // GgaAffx.23789.1.S1_at // GgaAffx.26777.1.S1_s_at // GgaAffx.24934.1.S1_s_at // Gga.8980.1.S1_s_at // GgaAffx.22014.2.S1_s_at // GgaAffx.23840.1.S1_s_at // GgaAffx.5541.1.S1_at // GgaAffx.1474.1.S1_at // GgaAffx.24899.1.S1_s_at // Gga.608…
GO:0048037	F	cofactor binding	23	456	248	24599	6.2e-10	5e-08	// Gga.4909.2.S1_s_at // GgaAffx.24899.1.S1_at // Gga.1132.1.S1_at // Gga.4425.1.S1_at // Gga.8980.1.S1_s_at // GgaAffx.23840.1.S1_s_at // GgaAffx.4468.1.S1_at // Gga.7320.1.S1_s_at // Gga.6085.3.S1_a_at // GgaAffx.26777.1.S1_s_at // GgaAffx.22014.2.S1_s_at // GgaAffx.23789.1.S1_at // GgaAffx.10350.1.S1_at // GgaAffx.5541.1.S1_at // GgaAffx.1474.1.S1_at // GgaAffx.24899.1.S1_s_at // GgaAffx.1433.…
GO:0016491	F	oxidoreductase activity	43	456	768	24599	9.2e-10	5e-08	// Gga.4909.2.S1_s_at // Gga.553.1.S1_at // GgaAffx.24899.1.S1_at // Gga.1132.1.S1_at // GgaAffx.20192.1.S1_s_at // GgaAffx.25618.1.S1_at // Gga.6936.1.A1_at // Gga.16450.1.S1_at // Gga.19278.1.S1_s_at // Gga.3415.1.S1_at // Gga.8980.1.S1_s_at // Gga.5623.2.S1_s_at // GgaAffx.25875.1.S1_s_at // Gga.7797.1.S1_s_at // Gga.4119.1.S1_at // GgaAffx.23840.1.S1_s_at // GgaAffx.4468.1.S1_at // Gga.7320.1…
GO:0015662	F	ATPase activity, coupled to transmembrane movement of ions, phosphorylative mechanism	12	456	86	24599	8.1e-08	3.3e-06	// GgaAffx.10968.1.S1_at // GgaAffx.1092.1.S1_s_at // GgaAffx.23508.1.S1_at // GgaAffx.4428.1.S1_at // GgaAffx.13099.1.S1_at // GgaAffx.8115.3.S1_s_at // GgaAffx.10104.2.S1_s_at // GgaAffx.10526.2.S1_s_at // Gga.18491.1.S1_s_at // GgaAffx.25789.4.S1_s_at // GgaAffx.4428.2.S1_s_at // GgaAffx.10968.2.S1_s_at
GO:0003824	F	catalytic activity	192	456	6582	24599	1.5e-07	5.1e-06	// GgaAffx.1092.1.S1_s_at // Gga.553.1.S1_at // GgaAffx.23641.3.S1_s_at // Gga.1132.1.S1_at // GgaAffx.20192.1.S1_s_at // GgaAffx.1528.1.S1_at // Gga.19278.1.S1_s_at // GgaAffx.24553.1.S1_at // Gga.7797.1.S1_s_at // Gga.2908.1.S1_at // GgaAffx.9403.1.S1_s_at // GgaAffx.21962.1.S1_at // GgaAffx.681.3.S1_s_at // Gga.7320.1.S1_s_at // Gga.345.1.S1_at // Gga.13310.1.S1_at // GgaAffx.7526.1.S1_at // G…
GO:0022857	F	transmembrane transporter activity	50	456	1185	24599	3.5e-07	9.4e-06	// GgaAffx.1092.1.S1_s_at // GgaAffx.25037.1.S1_at // GgaAffx.13099.1.S1_at // Gga.18973.1.S1_at // GgaAffx.10239.1.S1_at // GgaAffx.4023.1.S1_at // GgaAffx.10968.1.S1_at // GgaAffx.10526.2.S1_s_at // Gga.18491.1.S1_s_at // GgaAffx.23134.1.S1_at // GgaAffx.25789.4.S1_s_at // Gga.5522.2.S1_a_at // Gga.2148.4.S1_a_at // GgaAffx.882.2.S1_s_at // GgaAffx.7796.1.S1_s_at // GgaAffx.2712.2.S1_s_at // Gg…
GO:0016614	F	oxidoreductase activity, acting on CH-OH group of donors	12	456	102	24599	5.4e-07	1.3e-05	// Gga.9596.1.S1_at // Gga.1132.1.S1_at // GgaAffx.26483.1.S1_s_at // Gga.16991.2.S1_a_at // Gga.18930.2.S1_a_at // GgaAffx.22014.2.S1_s_at // GgaAffx.23840.1.S1_s_at // GgaAffx.5541.1.S1_at // Gga.3415.1.S1_at // Gga.5623.2.S1_s_at // GgaAffx.9083.1.S1_at // GgaAffx.1474.1.S1_at
GO:0022891	F	substrate-specific transmembrane transporter activity	46	456	1083	24599	7.8e-07	1.3e-05	// GgaAffx.1092.1.S1_s_at // GgaAffx.25037.1.S1_at // GgaAffx.13099.1.S1_at // Gga.18973.1.S1_at // GgaAffx.10239.1.S1_at // GgaAffx.4023.1.S1_at // GgaAffx.10526.2.S1_s_at // Gga.18491.1.S1_s_at // GgaAffx.23134.1.S1_at // GgaAffx.25789.4.S1_s_at // Gga.5522.2.S1_a_at // Gga.2148.4.S1_a_at // GgaAffx.882.2.S1_s_at // GgaAffx.7796.1.S1_s_at // GgaAffx.2712.2.S1_s_at // GgaAffx.23508.1.S1_at // Gg…
GO:0042625	F	ATPase activity, coupled to transmembrane movement of ions	12	456	105	24599	7.4e-07	1.3e-05	// GgaAffx.10968.1.S1_at // GgaAffx.1092.1.S1_s_at // GgaAffx.23508.1.S1_at // GgaAffx.4428.1.S1_at // GgaAffx.13099.1.S1_at // GgaAffx.8115.3.S1_s_at // GgaAffx.10104.2.S1_s_at // GgaAffx.10526.2.S1_s_at // Gga.18491.1.S1_s_at // GgaAffx.25789.4.S1_s_at // GgaAffx.4428.2.S1_s_at // GgaAffx.10968.2.S1_s_at
GO:0022804	F	active transmembrane transporter activity	28	456	504	24599	6.7e-07	1.3e-05	// GgaAffx.1092.1.S1_s_at // GgaAffx.13099.1.S1_at // Gga.18973.1.S1_at // Gga.18491.1.S1_s_at // GgaAffx.25789.4.S1_s_at // GgaAffx.10968.1.S1_at // GgaAffx.2712.2.S1_s_at // GgaAffx.22425.1.S1_s_at // GgaAffx.9798.1.S1_at // GgaAffx.10104.2.S1_s_at // GgaAffx.4984.2.S1_s_at // GgaAffx.10968.2.S1_s_at // GgaAffx.10140.2.S1_s_at // GgaAffx.4984.1.S1_at // GgaAffx.25679.1.S1_s_at // GgaAffx.8115.3…
GO:0050660	F	FAD binding	11	456	92	24599	1.3e-06	2e-05	// Gga.4909.2.S1_s_at // GgaAffx.4468.1.S1_at // Gga.7320.1.S1_s_at // GgaAffx.26777.1.S1_s_at // GgaAffx.26483.1.S1_s_at // GgaAffx.23789.1.S1_at // GgaAffx.24899.1.S1_at // GgaAffx.24899.1.S1_s_at // Gga.8980.1.S1_s_at // GgaAffx.1433.3.S1_s_at // GgaAffx.22036.3.S1_s_at
GO:0005215	F	transporter activity	60	456	1647	24599	3.1e-06	4.3e-05	// GgaAffx.1092.1.S1_s_at // GgaAffx.25037.1.S1_at // GgaAffx.8122.1.S1_at // GgaAffx.13099.1.S1_at // Gga.18973.1.S1_at // GgaAffx.26038.1.S1_at // GgaAffx.10239.1.S1_at // GgaAffx.4023.1.S1_at // Gga.19462.1.S1_s_at // GgaAffx.10968.1.S1_at // GgaAffx.10526.2.S1_s_at // Gga.19455.1.S1_at // GgaAffx.23134.1.S1_at // GgaAffx.25789.4.S1_s_at // Gga.5522.2.S1_a_at // Gga.2148.4.S1_a_at // GgaAffx.8…
GO:0016820	F	hydrolase activity, acting on acid anhydrides, catalyzing transmembrane movement of substances	14	456	168	24599	4.3e-06	5.4e-05	// GgaAffx.10968.1.S1_at // GgaAffx.1092.1.S1_s_at // GgaAffx.23508.1.S1_at // GgaAffx.4428.2.S1_s_at // GgaAffx.4428.1.S1_at // GgaAffx.13099.1.S1_at // GgaAffx.8115.3.S1_s_at // GgaAffx.10104.2.S1_s_at // GgaAffx.10526.2.S1_s_at // Gga.18491.1.S1_s_at // GgaAffx.3622.2.S1_s_at // GgaAffx.25789.4.S1_s_at // Gga.10666.1.S1_at // GgaAffx.10968.2.S1_s_at
GO:0016616	F	oxidoreductase activity, acting on the CH-OH group of donors, NAD or NADP as acceptor	10	456	89	24599	7e-06	8.2e-05	// Gga.9596.1.S1_at // Gga.1132.1.S1_at // Gga.18930.2.S1_a_at // GgaAffx.22014.2.S1_s_at // GgaAffx.23840.1.S1_s_at // GgaAffx.5541.1.S1_at // Gga.3415.1.S1_at // Gga.5623.2.S1_s_at // GgaAffx.9083.1.S1_at // GgaAffx.1474.1.S1_at
GO:0015075	F	ion transmembrane transporter activity	40	456	975	24599	7.9e-06	8.6e-05	// GgaAffx.1092.1.S1_s_at // GgaAffx.25037.1.S1_at // GgaAffx.13099.1.S1_at // GgaAffx.10239.1.S1_at // GgaAffx.4023.1.S1_at // GgaAffx.10526.2.S1_s_at // Gga.18491.1.S1_s_at // GgaAffx.23134.1.S1_at // GgaAffx.25789.4.S1_s_at // Gga.2148.4.S1_a_at // GgaAffx.882.2.S1_s_at // GgaAffx.7796.1.S1_s_at // GgaAffx.23508.1.S1_at // GgaAffx.9798.1.S1_at // Gga.4989.1.S1_s_at // GgaAffx.10104.2.S1_s_at /…
GO:0042626	F	ATPase activity, coupled to transmembrane movement of substances	13	456	161	24599	1.3e-05	0.00012	// GgaAffx.10968.1.S1_at // GgaAffx.1092.1.S1_s_at // GgaAffx.23508.1.S1_at // GgaAffx.4428.1.S1_at // GgaAffx.13099.1.S1_at // GgaAffx.8115.3.S1_s_at // GgaAffx.10104.2.S1_s_at // GgaAffx.10526.2.S1_s_at // Gga.18491.1.S1_s_at // GgaAffx.3622.2.S1_s_at // GgaAffx.25789.4.S1_s_at // GgaAffx.4428.2.S1_s_at // GgaAffx.10968.2.S1_s_at
GO:0043492	F	ATPase activity, coupled to movement of substances	13	456	161	24599	1.3e-05	0.00012	// GgaAffx.10968.1.S1_at // GgaAffx.1092.1.S1_s_at // GgaAffx.23508.1.S1_at // GgaAffx.4428.1.S1_at // GgaAffx.13099.1.S1_at // GgaAffx.8115.3.S1_s_at // GgaAffx.10104.2.S1_s_at // GgaAffx.10526.2.S1_s_at // Gga.18491.1.S1_s_at // GgaAffx.3622.2.S1_s_at // GgaAffx.25789.4.S1_s_at // GgaAffx.4428.2.S1_s_at // GgaAffx.10968.2.S1_s_at
GO:0030554	F	adenyl nucleotide binding	61	456	1776	24599	1.5e-05	0.00013	// Gga.4909.2.S1_s_at // GgaAffx.1092.1.S1_s_at // GgaAffx.4590.1.S1_at // GgaAffx.24899.1.S1_at // GgaAffx.26777.1.S1_s_at // GgaAffx.4657.1.S1_s_at // GgaAffx.25940.1.S1_at // GgaAffx.9792.1.S1_at // GgaAffx.1241.1.S1_at // Gga.16450.1.S1_at // GgaAffx.24503.1.S1_s_at // GgaAffx.1528.1.S1_at // GgaAffx.26299.1.S1_s_at // GgaAffx.1433.3.S1_s_at // Gga.8980.1.S1_s_at // GgaAffx.23641.3.S1_s_at //…
GO:0016712	F	oxidoreductase activity, acting on paired donors, with incorporation or reduction of molecular oxygen, reduced flavin or flavoprotein as one donor, and incorporation of one atom of oxygen	5	456	18	24599	1.6e-05	0.00014	// GgaAffx.21775.1.S1_s_at // GgaAffx.21825.1.S1_s_at // GgaAffx.13140.1.S1_at // GgaAffx.2444.1.S1_at // Gga.5397.1.S1_at
GO:0001883	F	purine nucleoside binding	61	456	1792	24599	1.9e-05	0.00015	// Gga.4909.2.S1_s_at // GgaAffx.1092.1.S1_s_at // GgaAffx.4590.1.S1_at // GgaAffx.24899.1.S1_at // GgaAffx.26777.1.S1_s_at // GgaAffx.4657.1.S1_s_at // GgaAffx.25940.1.S1_at // GgaAffx.9792.1.S1_at // GgaAffx.1241.1.S1_at // Gga.16450.1.S1_at // GgaAffx.24503.1.S1_s_at // GgaAffx.1528.1.S1_at // GgaAffx.26299.1.S1_s_at // GgaAffx.1433.3.S1_s_at // Gga.8980.1.S1_s_at // GgaAffx.23641.3.S1_s_at //…
GO:0001882	F	nucleoside binding	61	456	1795	24599	2e-05	0.00015	// Gga.4909.2.S1_s_at // GgaAffx.1092.1.S1_s_at // GgaAffx.4590.1.S1_at // GgaAffx.24899.1.S1_at // GgaAffx.26777.1.S1_s_at // GgaAffx.4657.1.S1_s_at // GgaAffx.25940.1.S1_at // GgaAffx.9792.1.S1_at // GgaAffx.1241.1.S1_at // Gga.16450.1.S1_at // GgaAffx.24503.1.S1_s_at // GgaAffx.1528.1.S1_at // GgaAffx.26299.1.S1_s_at // GgaAffx.1433.3.S1_s_at // Gga.8980.1.S1_s_at // GgaAffx.23641.3.S1_s_at //…
GO:0022892	F	substrate-specific transporter activity	48	456	1304	24599	1.9e-05	0.00015	// GgaAffx.1092.1.S1_s_at // GgaAffx.25037.1.S1_at // GgaAffx.13099.1.S1_at // Gga.18973.1.S1_at // GgaAffx.26038.1.S1_at // GgaAffx.10239.1.S1_at // GgaAffx.4023.1.S1_at // GgaAffx.10526.2.S1_s_at // Gga.18491.1.S1_s_at // GgaAffx.23134.1.S1_at // GgaAffx.25789.4.S1_s_at // Gga.5522.2.S1_a_at // Gga.2148.4.S1_a_at // GgaAffx.882.2.S1_s_at // GgaAffx.7796.1.S1_s_at // GgaAffx.2712.2.S1_s_at // Gg…
GO:0015399	F	primary active transmembrane transporter activity	13	456	175	24599	3.1e-05	0.00021	// GgaAffx.10968.1.S1_at // GgaAffx.1092.1.S1_s_at // GgaAffx.23508.1.S1_at // GgaAffx.4428.1.S1_at // GgaAffx.13099.1.S1_at // GgaAffx.8115.3.S1_s_at // GgaAffx.10104.2.S1_s_at // GgaAffx.10526.2.S1_s_at // Gga.18491.1.S1_s_at // GgaAffx.3622.2.S1_s_at // GgaAffx.25789.4.S1_s_at // GgaAffx.4428.2.S1_s_at // GgaAffx.10968.2.S1_s_at
GO:0015405	F	P-P-bond-hydrolysis-driven transmembrane transporter activity	13	456	175	24599	3.1e-05	0.00021	// GgaAffx.10968.1.S1_at // GgaAffx.1092.1.S1_s_at // GgaAffx.23508.1.S1_at // GgaAffx.4428.1.S1_at // GgaAffx.13099.1.S1_at // GgaAffx.8115.3.S1_s_at // GgaAffx.10104.2.S1_s_at // GgaAffx.10526.2.S1_s_at // Gga.18491.1.S1_s_at // GgaAffx.3622.2.S1_s_at // GgaAffx.25789.4.S1_s_at // GgaAffx.4428.2.S1_s_at // GgaAffx.10968.2.S1_s_at
GO:0016705	F	oxidoreductase activity, acting on paired donors, with incorporation or reduction of molecular oxygen	9	456	103	24599	0.00014	0.00095	// GgaAffx.21775.1.S1_s_at // GgaAffx.20192.1.S1_s_at // Gga.7797.1.S1_s_at // GgaAffx.13140.1.S1_at // Gga.4989.1.S1_s_at // Gga.5397.1.S1_at // GgaAffx.21825.1.S1_s_at // Gga.10747.1.S1_s_at // GgaAffx.2444.1.S1_at
GO:0000287	F	magnesium ion binding	21	456	463	24599	0.00024	0.0015	// GgaAffx.10968.1.S1_at // Gga.7186.2.S1_a_at // GgaAffx.9792.1.S1_at // GgaAffx.4428.1.S1_at // GgaAffx.23508.1.S1_at // GgaAffx.5993.1.S1_at // GgaAffx.1092.1.S1_s_at // GgaAffx.23564.2.S1_s_at // GgaAffx.542.1.S1_at // GgaAffx.24934.1.S1_s_at // GgaAffx.7131.1.S1_at // GgaAffx.5541.1.S1_at // GgaAffx.4428.2.S1_s_at // GgaAffx.9243.3.S1_s_at // GgaAffx.23641.3.S1_s_at // Gga.18491.1.S1_s_at //…
GO:0003707	F	steroid hormone receptor activity	6	456	49	24599	0.0003	0.0018	// GgaAffx.22432.1.S1_at // Gga.11217.1.S1_at // Gga.4315.3.S1_a_at // Gga.4006.2.S1_a_at // Gga.4315.2.S1_a_at // GgaAffx.2648.1.S1_s_at
GO:0000166	F	nucleotide binding	72	456	2463	24599	0.00035	0.0021	// Gga.4909.2.S1_s_at // Gga.19274.1.S1_s_at // GgaAffx.4428.1.S1_at // GgaAffx.1092.1.S1_s_at // GgaAffx.4590.1.S1_at // GgaAffx.24899.1.S1_at // Gga.1132.1.S1_at // GgaAffx.5994.1.S1_at // GgaAffx.4657.1.S1_s_at // GgaAffx.25940.1.S1_at // GgaAffx.9792.1.S1_at // GgaAffx.1241.1.S1_at // Gga.16450.1.S1_at // GgaAffx.24503.1.S1_s_at // GgaAffx.1528.1.S1_at // GgaAffx.26299.1.S1_s_at // GgaAffx.14…
GO:0017076	F	purine nucleotide binding	64	456	2138	24599	0.00038	0.0021	// Gga.4909.2.S1_s_at // GgaAffx.1092.1.S1_s_at // GgaAffx.4590.1.S1_at // GgaAffx.24899.1.S1_at // GgaAffx.26777.1.S1_s_at // GgaAffx.5994.1.S1_at // GgaAffx.4657.1.S1_s_at // GgaAffx.25940.1.S1_at // GgaAffx.9792.1.S1_at // GgaAffx.1241.1.S1_at // Gga.16450.1.S1_at // GgaAffx.24503.1.S1_s_at // GgaAffx.1528.1.S1_at // GgaAffx.26299.1.S1_s_at // GgaAffx.1433.3.S1_s_at // Gga.8980.1.S1_s_at // Gg…
GO:0004879	F	ligand-dependent nuclear receptor activity	6	456	52	24599	0.00041	0.0023	// GgaAffx.22432.1.S1_at // Gga.11217.1.S1_at // Gga.4315.3.S1_a_at // Gga.4006.2.S1_a_at // Gga.4315.2.S1_a_at // GgaAffx.2648.1.S1_s_at
GO:0004012	F	phospholipid-translocating ATPase activity	5	456	36	24599	0.00052	0.0027	// GgaAffx.10968.1.S1_at // GgaAffx.1092.1.S1_s_at // Gga.18491.1.S1_s_at // GgaAffx.25789.4.S1_s_at // GgaAffx.10968.2.S1_s_at
GO:0015247	F	aminophospholipid transporter activity	5	456	36	24599	0.00052	0.0027	// GgaAffx.10968.1.S1_at // GgaAffx.1092.1.S1_s_at // Gga.18491.1.S1_s_at // GgaAffx.25789.4.S1_s_at // GgaAffx.10968.2.S1_s_at
GO:0032559	F	adenyl ribonucleotide binding	51	456	1681	24599	0.00095	0.0046	// GgaAffx.1092.1.S1_s_at // GgaAffx.23641.3.S1_s_at // GgaAffx.4590.1.S1_at // GgaAffx.4657.1.S1_s_at // GgaAffx.25940.1.S1_at // GgaAffx.9792.1.S1_at // GgaAffx.1241.1.S1_at // Gga.16450.1.S1_at // GgaAffx.24503.1.S1_s_at // GgaAffx.1528.1.S1_at // GgaAffx.26299.1.S1_s_at // GgaAffx.1433.3.S1_s_at // Gga.18491.1.S1_s_at // GgaAffx.25789.4.S1_s_at // GgaAffx.21433.1.S1_s_at // GgaAffx.10968.1.S1…
GO:0022890	F	inorganic cation transmembrane transporter activity	11	456	189	24599	0.00096	0.0046	// Gga.2148.1.S1_at // GgaAffx.2712.2.S1_s_at // GgaAffx.882.2.S1_s_at // GgaAffx.13099.1.S1_at // GgaAffx.8115.3.S1_s_at // Gga.4989.1.S1_s_at // GgaAffx.10526.2.S1_s_at // GgaAffx.198.1.S1_at // GgaAffx.23508.1.S1_at // Gga.2148.4.S1_a_at // GgaAffx.10104.2.S1_s_at
GO:0005524	F	ATP binding	50	456	1654	24599	0.0011	0.0051	// GgaAffx.1092.1.S1_s_at // GgaAffx.23641.3.S1_s_at // GgaAffx.4590.1.S1_at // GgaAffx.4657.1.S1_s_at // GgaAffx.25940.1.S1_at // GgaAffx.9792.1.S1_at // GgaAffx.1241.1.S1_at // Gga.16450.1.S1_at // GgaAffx.24503.1.S1_s_at // GgaAffx.1528.1.S1_at // GgaAffx.26299.1.S1_s_at // GgaAffx.1433.3.S1_s_at // Gga.18491.1.S1_s_at // GgaAffx.25789.4.S1_s_at // GgaAffx.21433.1.S1_s_at // GgaAffx.10968.1.S1…
GO:0015078	F	hydrogen ion transmembrane transporter activity	8	456	110	24599	0.0011	0.0051	// GgaAffx.2712.2.S1_s_at // GgaAffx.882.2.S1_s_at // GgaAffx.13099.1.S1_at // GgaAffx.8115.3.S1_s_at // Gga.4989.1.S1_s_at // GgaAffx.10526.2.S1_s_at // GgaAffx.198.1.S1_at // GgaAffx.10104.2.S1_s_at
GO:0016836	F	hydro-lyase activity	5	456	45	24599	0.0015	0.0066	// Gga.5698.1.S1_at // GgaAffx.3310.1.S1_s_at // GgaAffx.3310.1.S1_at // GgaAffx.22014.2.S1_s_at // GgaAffx.10350.1.S1_at
GO:0020037	F	heme binding	9	456	149	24599	0.0021	0.009	// GgaAffx.21775.1.S1_s_at // GgaAffx.25618.1.S1_at // GgaAffx.12155.1.S1_s_at // GgaAffx.13140.1.S1_at // Gga.11674.1.S1_at // Gga.4989.1.S1_s_at // Gga.5397.1.S1_at // GgaAffx.21825.1.S1_s_at // GgaAffx.2444.1.S1_at
GO:0016757	F	transferase activity, transferring glycosyl groups	13	456	274	24599	0.0022	0.0092	// GgaAffx.7493.1.S1_s_at // Gga.12745.1.S1_at // Gga.16371.1.S1_s_at // GgaAffx.8298.1.S1_at // Gga.13310.1.S1_at // Gga.10147.1.S1_at // GgaAffx.10169.1.S1_at // GgaAffx.23315.1.S1_s_at // GgaAffx.26133.1.S1_s_at // Gga.4485.2.S1_s_at // Gga.5851.3.S1_s_at // GgaAffx.25183.1.S1_at // GgaAffx.711.1.A1_at
GO:0016758	F	transferase activity, transferring hexosyl groups	10	456	180	24599	0.0022	0.0092	// GgaAffx.7493.1.S1_s_at // Gga.12745.1.S1_at // Gga.16371.1.S1_s_at // Gga.10147.1.S1_at // Gga.13310.1.S1_at // GgaAffx.10169.1.S1_at // GgaAffx.23315.1.S1_s_at // GgaAffx.26133.1.S1_s_at // Gga.4485.2.S1_s_at // Gga.5851.3.S1_s_at
GO:0051287	F	NAD or NADH binding	5	456	50	24599	0.0024	0.0095	// Gga.9596.1.S1_at // GgaAffx.23840.1.S1_s_at // GgaAffx.9083.1.S1_at // GgaAffx.1474.1.S1_at // Gga.1132.1.S1_at
GO:0015077	F	monovalent inorganic cation transmembrane transporter activity	8	456	125	24599	0.0025	0.0098	// GgaAffx.2712.2.S1_s_at // GgaAffx.882.2.S1_s_at // GgaAffx.13099.1.S1_at // GgaAffx.8115.3.S1_s_at // Gga.4989.1.S1_s_at // GgaAffx.10526.2.S1_s_at // GgaAffx.198.1.S1_at // GgaAffx.10104.2.S1_s_at
GO:0005548	F	phospholipid transporter activity	5	456	51	24599	0.0026	0.0099	// GgaAffx.10968.1.S1_at // GgaAffx.1092.1.S1_s_at // Gga.18491.1.S1_s_at // GgaAffx.25789.4.S1_s_at // GgaAffx.10968.2.S1_s_at
GO:0008324	F	cation transmembrane transporter activity	26	456	753	24599	0.0027	0.01	// GgaAffx.13099.1.S1_at // GgaAffx.10239.1.S1_at // GgaAffx.4023.1.S1_at // Gga.2148.4.S1_a_at // GgaAffx.10140.2.S1_s_at // GgaAffx.7796.1.S1_s_at // GgaAffx.23508.1.S1_at // Gga.4989.1.S1_s_at // GgaAffx.10104.2.S1_s_at // GgaAffx.10526.2.S1_s_at // Gga.2148.1.S1_at // GgaAffx.9792.1.S1_at // GgaAffx.882.2.S1_s_at // GgaAffx.8115.3.S1_s_at // Gga.11487.1.S1_s_at // GgaAffx.8655.1.S1_s_at // Gg…
GO:0046906	F	tetrapyrrole binding	9	456	159	24599	0.0032	0.012	// GgaAffx.21775.1.S1_s_at // GgaAffx.25618.1.S1_at // GgaAffx.12155.1.S1_s_at // GgaAffx.13140.1.S1_at // Gga.11674.1.S1_at // Gga.4989.1.S1_s_at // Gga.5397.1.S1_at // GgaAffx.21825.1.S1_s_at // GgaAffx.2444.1.S1_at
GO:0016835	F	carbon-oxygen lyase activity	5	456	54	24599	0.0033	0.012	// Gga.5698.1.S1_at // GgaAffx.3310.1.S1_s_at // GgaAffx.3310.1.S1_at // GgaAffx.22014.2.S1_s_at // GgaAffx.10350.1.S1_at
GO:0016651	F	oxidoreductase activity, acting on NADH or NADPH	6	456	80	24599	0.0039	0.014	// Gga.4909.2.S1_s_at // Gga.7320.1.S1_s_at // GgaAffx.26777.1.S1_s_at // Gga.5397.1.S1_at // Gga.7254.2.S1_a_at // GgaAffx.22036.3.S1_s_at
GO:0005342	F	organic acid transmembrane transporter activity	7	456	108	24599	0.0043	0.014	// GgaAffx.21393.1.S1_s_at // GgaAffx.22425.1.S1_s_at // GgaAffx.9798.1.S1_at // GgaAffx.6107.1.S1_s_at // GgaAffx.2712.2.S1_s_at // Gga.5522.2.S1_a_at // GgaAffx.10140.2.S1_s_at
GO:0046943	F	carboxylic acid transmembrane transporter activity	7	456	108	24599	0.0043	0.014	// GgaAffx.21393.1.S1_s_at // GgaAffx.22425.1.S1_s_at // GgaAffx.9798.1.S1_at // GgaAffx.6107.1.S1_s_at // GgaAffx.2712.2.S1_s_at // Gga.5522.2.S1_a_at // GgaAffx.10140.2.S1_s_at
GO:0015291	F	secondary active transmembrane transporter activity	13	456	295	24599	0.0042	0.014	// GgaAffx.9310.1.S1_s_at // GgaAffx.2712.2.S1_s_at // GgaAffx.10140.2.S1_s_at // GgaAffx.4984.1.S1_at // GgaAffx.9798.1.S1_at // GgaAffx.25679.1.S1_s_at // GgaAffx.5008.1.S1_at // GgaAffx.4984.2.S1_s_at // Gga.267.1.S1_at // GgaAffx.6107.1.S1_s_at // GgaAffx.198.1.S1_at // GgaAffx.22340.1.S1_s_at // GgaAffx.22425.1.S1_s_at
GO:0031404	F	chloride ion binding	5	456	58	24599	0.0045	0.015	// GgaAffx.23134.1.S1_at // GgaAffx.5008.1.S1_at // GgaAffx.25037.1.S1_at // GgaAffx.4984.1.S1_at // GgaAffx.4984.2.S1_s_at
GO:0016887	F	ATPase activity	18	456	482	24599	0.0051	0.016	// GgaAffx.10968.1.S1_at // GgaAffx.1092.1.S1_s_at // GgaAffx.2572.1.S1_at // GgaAffx.23508.1.S1_at // GgaAffx.3622.2.S1_s_at // GgaAffx.4428.1.S1_at // GgaAffx.13099.1.S1_at // GgaAffx.4657.1.S1_s_at // Gga.7294.1.S1_at // GgaAffx.10104.2.S1_s_at // GgaAffx.10526.2.S1_s_at // GgaAffx.1279.2.S1_s_at // Gga.18491.1.S1_s_at // GgaAffx.10968.2.S1_s_at // GgaAffx.25789.4.S1_s_at // GgaAffx.8115.3.S1_…
GO:0043168	F	anion binding	5	456	60	24599	0.0052	0.016	// GgaAffx.23134.1.S1_at // GgaAffx.5008.1.S1_at // GgaAffx.25037.1.S1_at // GgaAffx.4984.1.S1_at // GgaAffx.4984.2.S1_s_at
GO:0042623	F	ATPase activity, coupled	15	456	377	24599	0.0057	0.017	// GgaAffx.10968.1.S1_at // GgaAffx.1092.1.S1_s_at // GgaAffx.2572.1.S1_at // GgaAffx.23508.1.S1_at // GgaAffx.4428.1.S1_at // GgaAffx.13099.1.S1_at // GgaAffx.8115.3.S1_s_at // GgaAffx.10104.2.S1_s_at // GgaAffx.10526.2.S1_s_at // GgaAffx.1279.2.S1_s_at // Gga.18491.1.S1_s_at // GgaAffx.3622.2.S1_s_at // GgaAffx.25789.4.S1_s_at // GgaAffx.4428.2.S1_s_at // GgaAffx.10968.2.S1_s_at
GO:0008194	F	UDP-glycosyltransferase activity	7	456	121	24599	0.0078	0.023	// GgaAffx.7493.1.S1_s_at // Gga.12745.1.S1_at // Gga.10147.1.S1_at // Gga.13310.1.S1_at // GgaAffx.10169.1.S1_at // GgaAffx.23315.1.S1_s_at // GgaAffx.26133.1.S1_s_at
GO:0005515	F	protein binding	168	456	7275	24599	0.0087	0.025	// GgaAffx.26737.1.S1_at // GgaAffx.23641.3.S1_s_at // GgaAffx.25037.1.S1_at // GgaAffx.20192.1.S1_s_at // GgaAffx.23882.1.S1_at // GgaAffx.2648.1.S1_s_at // GgaAffx.24862.1.S1_at // Gga.5522.2.S1_a_at // GgaAffx.5095.1.S1_at // Gga.18300.1.S1_at // GgaAffx.25609.1.S1_at // GgaAffx.23149.2.S1_s_at // GgaAffx.4150.2.S1_s_at // Gga.345.1.S1_at // GgaAffx.24000.1.S1_s_at // Gga.1742.1.S1_a_at // Gga…
GO:0016787	F	hydrolase activity	69	456	2708	24599	0.0096	0.027	// GgaAffx.1092.1.S1_s_at // GgaAffx.25677.1.S1_s_at // GgaAffx.712.1.S1_at // GgaAffx.1852.2.S1_s_at // GgaAffx.13099.1.S1_at // GgaAffx.4249.1.S1_x_at // GgaAffx.20285.1.S1_s_at // Gga.8230.1.S1_at // GgaAffx.7255.1.S1_at // GgaAffx.9243.3.S1_s_at // GgaAffx.1279.2.S1_s_at // Gga.18491.1.S1_s_at // GgaAffx.25789.4.S1_s_at // GgaAffx.3218.1.S1_s_at // GgaAffx.10968.1.S1_at // GgaAffx.21962.1.S1_…
GO:0032555	F	purine ribonucleotide binding	54	456	2035	24599	0.0094	0.027	// GgaAffx.1092.1.S1_s_at // GgaAffx.23641.3.S1_s_at // GgaAffx.4590.1.S1_at // GgaAffx.5994.1.S1_at // GgaAffx.4657.1.S1_s_at // GgaAffx.25940.1.S1_at // GgaAffx.9792.1.S1_at // GgaAffx.1241.1.S1_at // Gga.16450.1.S1_at // GgaAffx.24503.1.S1_s_at // GgaAffx.1528.1.S1_at // GgaAffx.26299.1.S1_s_at // GgaAffx.1433.3.S1_s_at // Gga.18491.1.S1_s_at // GgaAffx.25789.4.S1_s_at // GgaAffx.21433.1.S1_s_…
GO:0032553	F	ribonucleotide binding	54	456	2035	24599	0.0094	0.027	// GgaAffx.1092.1.S1_s_at // GgaAffx.23641.3.S1_s_at // GgaAffx.4590.1.S1_at // GgaAffx.5994.1.S1_at // GgaAffx.4657.1.S1_s_at // GgaAffx.25940.1.S1_at // GgaAffx.9792.1.S1_at // GgaAffx.1241.1.S1_at // Gga.16450.1.S1_at // GgaAffx.24503.1.S1_s_at // GgaAffx.1528.1.S1_at // GgaAffx.26299.1.S1_s_at // GgaAffx.1433.3.S1_s_at // Gga.18491.1.S1_s_at // GgaAffx.25789.4.S1_s_at // GgaAffx.21433.1.S1_s_…
GO:0004497	F	monooxygenase activity	6	456	97	24599	0.0098	0.027	// GgaAffx.21775.1.S1_s_at // GgaAffx.13140.1.S1_at // Gga.5397.1.S1_at // GgaAffx.21825.1.S1_s_at // GgaAffx.12938.14.S1_s_at // GgaAffx.2444.1.S1_at
GO:0031420	F	alkali metal ion binding	11	456	263	24599	0.011	0.03	// GgaAffx.9310.1.S1_s_at // Gga.7186.2.S1_a_at // GgaAffx.9792.1.S1_at // GgaAffx.10239.1.A1_at // GgaAffx.4023.1.S1_at // Gga.11950.1.S1_s_at // Gga.267.1.S1_at // GgaAffx.10239.1.S1_at // GgaAffx.6107.1.S1_s_at // GgaAffx.4006.1.S1_at // GgaAffx.198.1.S1_at
GO:0016740	F	transferase activity	62	456	2418	24599	0.012	0.03	// GgaAffx.6023.1.S1_at // GgaAffx.916.1.S1_at // GgaAffx.23641.3.S1_s_at // GgaAffx.4590.1.S1_at // GgaAffx.26777.1.S1_s_at // Gga.14395.1.S1_s_at // GgaAffx.25940.1.S1_at // GgaAffx.907.1.S1_at // GgaAffx.1241.1.S1_at // GgaAffx.9792.1.S1_at // Gga.4425.1.S1_at // GgaAffx.24503.1.S1_s_at // GgaAffx.1528.1.S1_at // GgaAffx.26299.1.S1_s_at // GgaAffx.6314.1.S1_s_at // Gga.7118.2.S1_s_at // GgaAff…
GO:0004713	F	protein tyrosine kinase activity	10	456	230	24599	0.012	0.031	// Gga.19274.1.S1_s_at // GgaAffx.6023.1.S1_at // GgaAffx.26299.1.S1_s_at // GgaAffx.7522.1.S1_s_at // GgaAffx.9514.1.S1_at // Gga.2908.1.S1_at // GgaAffx.24503.1.S1_s_at // Gga.1891.1.S1_at // GgaAffx.20978.1.S1_s_at // GgaAffx.21433.1.S1_s_at
GO:0004091	F	carboxylesterase activity	6	456	102	24599	0.012	0.031	// Gga.16586.1.S1_at // Gga.2475.1.S1_at // Gga.5922.2.S1_a_at // Gga.11447.1.S1_a_at // Gga.51.1.S1_at // Gga.7797.1.S1_s_at
GO:0005506	F	iron ion binding	13	456	338	24599	0.012	0.031	// GgaAffx.21775.1.S1_s_at // GgaAffx.25618.1.S1_at // GgaAffx.23789.1.S1_at // GgaAffx.12155.1.S1_s_at // GgaAffx.13140.1.S1_at // Gga.16991.2.S1_a_at // GgaAffx.10350.1.S1_at // Gga.11674.1.S1_at // Gga.4989.1.S1_s_at // Gga.5397.1.S1_at // GgaAffx.21825.1.S1_s_at // GgaAffx.2444.1.S1_at // GgaAffx.22036.3.S1_s_at
GO:0003779	F	actin binding	16	456	462	24599	0.015	0.037	// GgaAffx.6023.1.S1_at // GgaAffx.24513.9.S1_s_at // Gga.12255.1.S1_s_at // GgaAffx.2572.1.S1_at // GgaAffx.26411.1.S1_s_at // Gga.4722.1.S1_s_at // GgaAffx.5630.9.S1_s_at // Gga.10758.1.S1_at // GgaAffx.10417.7.S1_s_at // GgaAffx.7774.2.S1_at // GgaAffx.7255.1.S1_at // GgaAffx.24513.7.S1_s_at // GgaAffx.1279.2.S1_s_at // GgaAffx.8894.1.S1_at // GgaAffx.8944.1.S1_s_at // Gga.637.1.S1_at
GO:0016773	F	phosphotransferase activity, alcohol group as acceptor	29	456	997	24599	0.015	0.038	// GgaAffx.6023.1.S1_at // GgaAffx.23641.3.S1_s_at // GgaAffx.4590.1.S1_at // Gga.14395.1.S1_s_at // GgaAffx.25940.1.S1_at // GgaAffx.9514.1.S1_at // GgaAffx.1241.1.S1_at // GgaAffx.6526.7.S1_s_at // GgaAffx.1528.1.S1_at // GgaAffx.26299.1.S1_s_at // GgaAffx.6314.1.S1_s_at // Gga.2908.1.S1_at // GgaAffx.26684.1.S1_at // GgaAffx.549.1.S1_at // GgaAffx.7522.1.S1_s_at // GgaAffx.21433.1.S1_s_at // G…
GO:0030145	F	manganese ion binding	7	456	144	24599	0.019	0.045	// GgaAffx.5993.1.S1_at // Gga.10147.1.S1_at // Gga.1132.1.S1_at // GgaAffx.10169.1.S1_at // GgaAffx.23315.1.S1_s_at // GgaAffx.5541.1.S1_at // GgaAffx.3218.1.S1_s_at
GO:0043167	F	ion binding	108	456	4629	24599	0.019	0.045	// GgaAffx.1092.1.S1_s_at // GgaAffx.23641.3.S1_s_at // GgaAffx.25037.1.S1_at // Gga.1132.1.S1_at // Gga.1325.1.S1_at // GgaAffx.10417.7.S1_s_at // GgaAffx.681.3.S1_s_at // Gga.9368.1.S1_at // Gga.5397.1.S1_at // GgaAffx.3310.1.S1_s_at // Gga.4315.3.S1_a_at // GgaAffx.7131.1.S1_at // Gga.8774.1.S1_s_at // GgaAffx.7879.1.S1_at // GgaAffx.22730.1.S1_at // GgaAffx.22926.1.S1_at // GgaAffx.10239.1.A1…
GO:0008092	F	cytoskeletal protein binding	20	456	644	24599	0.021	0.049	// GgaAffx.6023.1.S1_at // GgaAffx.24513.9.S1_s_at // Gga.12255.1.S1_s_at // GgaAffx.2572.1.S1_at // GgaAffx.26411.1.S1_s_at // Gga.4722.1.S1_s_at // GgaAffx.5630.9.S1_s_at // Gga.10758.1.S1_at // Gga.5263.3.S1_s_at // GgaAffx.10417.7.S1_s_at // GgaAffx.7774.2.S1_at // GgaAffx.24127.1.S1_at // GgaAffx.7255.1.S1_at // GgaAffx.24513.7.S1_s_at // GgaAffx.21483.1.S1_at // GgaAffx.1279.2.S1_s_at // Gg…
GO:0030955	F	potassium ion binding	7	456	150	24599	0.023	0.053	// GgaAffx.9310.1.S1_s_at // GgaAffx.9792.1.S1_at // GgaAffx.10239.1.A1_at // Gga.11950.1.S1_s_at // GgaAffx.10239.1.S1_at // GgaAffx.4006.1.S1_at // GgaAffx.4023.1.S1_at
GO:0042578	F	phosphoric ester hydrolase activity	14	456	415	24599	0.026	0.06	// GgaAffx.24127.1.S1_at // Gga.7186.2.S1_a_at // GgaAffx.25677.1.S1_s_at // GgaAffx.24884.1.S1_s_at // GgaAffx.681.3.S1_s_at // GgaAffx.1852.2.S1_s_at // GgaAffx.23111.1.S1_s_at // GgaAffx.7526.1.S1_at // Gga.2475.1.S1_at // GgaAffx.26610.2.S1_s_at // GgaAffx.5993.1.S1_at // GgaAffx.25392.2.S1_s_at // GgaAffx.23494.1.S1_s_at // GgaAffx.3218.1.S1_s_at
GO:0005319	F	lipid transporter activity	5	456	91	24599	0.028	0.063	// GgaAffx.10968.1.S1_at // GgaAffx.1092.1.S1_s_at // Gga.18491.1.S1_s_at // GgaAffx.25789.4.S1_s_at // GgaAffx.10968.2.S1_s_at
GO:0004842	F	ubiquitin-protein ligase activity	7	456	157	24599	0.029	0.063	// GgaAffx.6430.1.S1_at // GgaAffx.25682.1.S1_s_at // GgaAffx.24941.1.S1_at // Gga.63.1.S1_s_at // GgaAffx.21089.1.S1_s_at // GgaAffx.24941.1.S1_s_at // Gga.10623.1.S1_s_at
GO:0005267	F	potassium channel activity	7	456	159	24599	0.03	0.065	// GgaAffx.9792.1.S1_at // GgaAffx.10239.1.A1_at // Gga.11950.1.S1_s_at // Gga.11487.1.S1_s_at // GgaAffx.10239.1.S1_at // GgaAffx.4006.1.S1_at // GgaAffx.4023.1.S1_at
GO:0016829	F	lyase activity	7	456	159	24599	0.03	0.065	// GgaAffx.11527.1.S1_at // Gga.5698.1.S1_at // GgaAffx.22014.2.S1_s_at // GgaAffx.10350.1.S1_at // GgaAffx.3310.1.S1_at // GgaAffx.7522.1.S1_s_at // GgaAffx.3310.1.S1_s_at
GO:0004866	F	endopeptidase inhibitor activity	8	456	198	24599	0.033	0.071	// GgaAffx.2108.1.S1_at // Gga.19274.1.S1_s_at // GgaAffx.8887.1.S1_s_at // GgaAffx.4249.1.S1_x_at // GgaAffx.22594.1.S1_s_at // GgaAffx.5618.1.S1_at // Gga.4055.1.S1_at // Gga.6976.1.S1_at
GO:0008509	F	anion transmembrane transporter activity	7	456	163	24599	0.034	0.072	// GgaAffx.9310.1.S1_s_at // GgaAffx.25037.1.S1_at // GgaAffx.4984.1.S1_at // GgaAffx.9798.1.S1_at // GgaAffx.5008.1.S1_at // GgaAffx.23134.1.S1_at // GgaAffx.4984.2.S1_s_at
GO:0005488	F	binding	289	456	13573	24599	0.035	0.072	// GgaAffx.1092.1.S1_s_at // GgaAffx.26737.1.S1_at // GgaAffx.23641.3.S1_s_at // GgaAffx.25037.1.S1_at // Gga.1132.1.S1_at // GgaAffx.20192.1.S1_s_at // GgaAffx.9629.1.S1_at // GgaAffx.23988.1.S1_at // GgaAffx.23882.1.S1_at // GgaAffx.22707.1.S1_at // Gga.6181.1.S1_at // Gga.1325.1.S1_at // Gga.17323.1.S1_at // Gga.5522.2.S1_a_at // GgaAffx.5095.1.S1_at // Gga.18300.1.S1_at // Gga.2509.1.S1_at //…
GO:0043169	F	cation binding	104	456	4580	24599	0.036	0.073	// GgaAffx.1092.1.S1_s_at // GgaAffx.23641.3.S1_s_at // Gga.1132.1.S1_at // Gga.1325.1.S1_at // GgaAffx.10417.7.S1_s_at // GgaAffx.681.3.S1_s_at // Gga.9368.1.S1_at // Gga.5397.1.S1_at // GgaAffx.3310.1.S1_s_at // Gga.4315.3.S1_a_at // GgaAffx.7131.1.S1_at // Gga.8774.1.S1_s_at // GgaAffx.7879.1.S1_at // GgaAffx.22730.1.S1_at // GgaAffx.22926.1.S1_at // GgaAffx.10239.1.A1_at // Gga.10147.1.S1_at …
GO:0016881	F	acid-amino acid ligase activity	9	456	239	24599	0.037	0.075	// GgaAffx.6430.1.S1_at // GgaAffx.25682.1.S1_s_at // GgaAffx.21140.1.S1_s_at // GgaAffx.24941.1.S1_at // Gga.63.1.S1_s_at // GgaAffx.21089.1.S1_s_at // Gga.10623.1.S1_s_at // GgaAffx.24934.1.S1_s_at // GgaAffx.24941.1.S1_s_at
GO:0016817	F	hydrolase activity, acting on acid anhydrides	27	456	995	24599	0.039	0.077	// GgaAffx.1092.1.S1_s_at // GgaAffx.1852.2.S1_s_at // GgaAffx.13099.1.S1_at // GgaAffx.4657.1.S1_s_at // Gga.18491.1.S1_s_at // GgaAffx.25789.4.S1_s_at // GgaAffx.10968.1.S1_at // GgaAffx.23508.1.S1_at // GgaAffx.25677.1.S1_s_at // GgaAffx.10104.2.S1_s_at // GgaAffx.8115.3.S1_s_at // GgaAffx.10968.2.S1_s_at // GgaAffx.4442.3.S1_s_at // Gga.7294.1.S1_at // GgaAffx.22730.1.S1_at // GgaAffx.1279.2.…
GO:0015293	F	symporter activity	8	456	206	24599	0.041	0.079	// GgaAffx.9310.1.S1_s_at // GgaAffx.2712.2.S1_s_at // GgaAffx.10140.2.S1_s_at // GgaAffx.25679.1.S1_s_at // Gga.267.1.S1_at // GgaAffx.6107.1.S1_s_at // GgaAffx.22340.1.S1_s_at // GgaAffx.22425.1.S1_s_at
GO:0004872	F	receptor activity	41	456	1631	24599	0.04	0.079	// Gga.2967.1.S1_at // GgaAffx.4657.1.S1_s_at // GgaAffx.10012.1.S1_at // GgaAffx.2639.1.S1_at // GgaAffx.3976.1.S1_at // GgaAffx.22707.1.S1_at // GgaAffx.6154.1.S1_at // GgaAffx.26220.2.S1_s_at // GgaAffx.10140.2.S1_s_at // GgaAffx.9516.1.S1_at // GgaAffx.23149.2.S1_s_at // GgaAffx.23149.1.S1_at // GgaAffx.12155.1.S1_s_at // Gga.4048.1.S1_at // Gga.2908.1.S1_at // Gga.2509.1.S1_at // GgaAffx.241…
GO:0030414	F	peptidase inhibitor activity	8	456	210	24599	0.045	0.082	// GgaAffx.2108.1.S1_at // Gga.19274.1.S1_s_at // GgaAffx.8887.1.S1_s_at // GgaAffx.4249.1.S1_x_at // GgaAffx.22594.1.S1_s_at // GgaAffx.5618.1.S1_at // Gga.4055.1.S1_at // Gga.6976.1.S1_at
GO:0060089	F	molecular transducer activity	50	456	2059	24599	0.044	0.082	// Gga.2967.1.S1_at // GgaAffx.4657.1.S1_s_at // GgaAffx.10012.1.S1_at // GgaAffx.2639.1.S1_at // GgaAffx.3976.1.S1_at // GgaAffx.22707.1.S1_at // Gga.10895.1.S1_s_at // GgaAffx.6154.1.S1_at // GgaAffx.26220.2.S1_s_at // GgaAffx.10140.2.S1_s_at // GgaAffx.9516.1.S1_at // GgaAffx.26684.1.S1_at // GgaAffx.23149.2.S1_s_at // GgaAffx.23149.1.S1_at // Gga.345.1.S1_at // GgaAffx.12155.1.S1_s_at // Gga.…
GO:0046873	F	metal ion transmembrane transporter activity	14	456	447	24599	0.044	0.082	// GgaAffx.7796.1.S1_s_at // Gga.2148.1.S1_at // GgaAffx.9792.1.S1_at // GgaAffx.10239.1.A1_at // GgaAffx.23508.1.S1_at // Gga.10147.1.S1_at // Gga.11950.1.S1_s_at // Gga.11487.1.S1_s_at // GgaAffx.10239.1.S1_at // GgaAffx.8655.1.S1_s_at // GgaAffx.4006.1.S1_at // GgaAffx.4023.1.S1_at // Gga.2148.4.S1_a_at // GgaAffx.22036.3.S1_s_at
GO:0046872	F	metal ion binding	102	456	4534	24599	0.044	0.082	// GgaAffx.1092.1.S1_s_at // GgaAffx.23641.3.S1_s_at // Gga.1132.1.S1_at // Gga.1325.1.S1_at // GgaAffx.10417.7.S1_s_at // GgaAffx.681.3.S1_s_at // Gga.9368.1.S1_at // Gga.5397.1.S1_at // GgaAffx.3310.1.S1_s_at // Gga.4315.3.S1_a_at // GgaAffx.7131.1.S1_at // Gga.8774.1.S1_s_at // GgaAffx.7879.1.S1_at // GgaAffx.22730.1.S1_at // GgaAffx.22926.1.S1_at // GgaAffx.10239.1.A1_at // Gga.10147.1.S1_at …
GO:0004871	F	signal transducer activity	50	456	2059	24599	0.044	0.082	// Gga.2967.1.S1_at // GgaAffx.4657.1.S1_s_at // GgaAffx.10012.1.S1_at // GgaAffx.2639.1.S1_at // GgaAffx.3976.1.S1_at // GgaAffx.22707.1.S1_at // Gga.10895.1.S1_s_at // GgaAffx.6154.1.S1_at // GgaAffx.26220.2.S1_s_at // GgaAffx.10140.2.S1_s_at // GgaAffx.9516.1.S1_at // GgaAffx.26684.1.S1_at // GgaAffx.23149.2.S1_s_at // GgaAffx.23149.1.S1_at // Gga.345.1.S1_at // GgaAffx.12155.1.S1_s_at // Gga.…
GO:0016853	F	isomerase activity	6	456	138	24599	0.045	0.082	// GgaAffx.20192.1.S1_s_at // Gga.11217.1.S1_at // GgaAffx.22014.2.S1_s_at // GgaAffx.2077.1.S1_s_at // GgaAffx.24553.1.S1_at // GgaAffx.2648.1.S1_s_at
GO:0016462	F	pyrophosphatase activity	26	456	982	24599	0.052	0.094	// GgaAffx.1092.1.S1_s_at // GgaAffx.1852.2.S1_s_at // GgaAffx.13099.1.S1_at // GgaAffx.4657.1.S1_s_at // Gga.18491.1.S1_s_at // GgaAffx.25789.4.S1_s_at // GgaAffx.10968.1.S1_at // GgaAffx.23508.1.S1_at // GgaAffx.25677.1.S1_s_at // GgaAffx.10104.2.S1_s_at // GgaAffx.8115.3.S1_s_at // GgaAffx.10968.2.S1_s_at // GgaAffx.4442.3.S1_s_at // Gga.7294.1.S1_at // GgaAffx.22730.1.S1_at // GgaAffx.1279.2.…
GO:0016818	F	hydrolase activity, acting on acid anhydrides, in phosphorus-containing anhydrides	26	456	988	24599	0.055	0.097	// GgaAffx.1092.1.S1_s_at // GgaAffx.1852.2.S1_s_at // GgaAffx.13099.1.S1_at // GgaAffx.4657.1.S1_s_at // Gga.18491.1.S1_s_at // GgaAffx.25789.4.S1_s_at // GgaAffx.10968.1.S1_at // GgaAffx.23508.1.S1_at // GgaAffx.25677.1.S1_s_at // GgaAffx.10104.2.S1_s_at // GgaAffx.8115.3.S1_s_at // GgaAffx.10968.2.S1_s_at // GgaAffx.4442.3.S1_s_at // Gga.7294.1.S1_at // GgaAffx.22730.1.S1_at // GgaAffx.1279.2.…
GO:0046983	F	protein dimerization activity	13	456	421	24599	0.055	0.097	// Gga.2166.1.S1_at // GgaAffx.2648.1.S1_s_at // GgaAffx.22432.1.S1_at // GgaAffx.23840.1.S1_s_at // GgaAffx.3622.2.S1_s_at // GgaAffx.9793.1.S1_at // GgaAffx.24934.1.S1_s_at // Gga.2166.3.S1_a_at // Gga.4425.1.S1_at // Gga.4006.2.S1_a_at // GgaAffx.1279.2.S1_s_at // Gga.7556.1.S1_at // Gga.10758.1.S1_at
GO:0043176	F	amine binding	5	456	110	24599	0.055	0.097	// Gga.4425.1.S1_at // Gga.11343.1.S1_at // GgaAffx.24934.1.S1_s_at // GgaAffx.24899.1.S1_at // GgaAffx.24899.1.S1_s_at
GO:0016247	F	channel regulator activity	5	456	112	24599	0.059	0.1	// Gga.63.1.S1_s_at // GgaAffx.9792.1.S1_at // GgaAffx.8655.1.S1_s_at // Gga.10147.1.S1_at // GgaAffx.25682.1.S1_s_at
GO:0005496	F	steroid binding	5	456	113	24599	0.061	0.1	// GgaAffx.12155.1.S1_s_at // GgaAffx.2648.1.S1_s_at // GgaAffx.1474.1.S1_at // Gga.11217.1.S1_at // Gga.4119.1.S1_at
GO:0016874	F	ligase activity	14	456	481	24599	0.071	0.12	// GgaAffx.6430.1.S1_at // GgaAffx.25682.1.S1_s_at // GgaAffx.21140.1.S1_s_at // Gga.18598.1.S1_at // Gga.63.1.S1_s_at // GgaAffx.24941.1.S1_s_at // GgaAffx.21089.1.S1_s_at // GgaAffx.12279.1.S1_s_at // GgaAffx.24934.1.S1_s_at // Gga.12996.1.S1_at // GgaAffx.24941.1.S1_at // GgaAffx.4278.2.S1_s_at // Gga.10623.1.S1_s_at // GgaAffx.1433.3.S1_s_at
GO:0042803	F	protein homodimerization activity	8	456	232	24599	0.071	0.12	// GgaAffx.23840.1.S1_s_at // GgaAffx.2648.1.S1_s_at // GgaAffx.22432.1.S1_at // GgaAffx.3622.2.S1_s_at // GgaAffx.9793.1.S1_at // Gga.4425.1.S1_at // Gga.7556.1.S1_at // Gga.10758.1.S1_at
GO:0019787	F	small conjugating protein ligase activity	7	456	193	24599	0.071	0.12	// GgaAffx.6430.1.S1_at // GgaAffx.25682.1.S1_s_at // GgaAffx.24941.1.S1_at // Gga.63.1.S1_s_at // GgaAffx.21089.1.S1_s_at // GgaAffx.24941.1.S1_s_at // Gga.10623.1.S1_s_at
GO:0016788	F	hydrolase activity, acting on ester bonds	22	456	840	24599	0.075	0.12	// GgaAffx.7526.1.S1_at // GgaAffx.1852.2.S1_s_at // Gga.7797.1.S1_s_at // GgaAffx.3218.1.S1_s_at // GgaAffx.24884.1.S1_s_at // GgaAffx.681.3.S1_s_at // GgaAffx.25677.1.S1_s_at // Gga.5922.2.S1_a_at // GgaAffx.2648.1.S1_s_at // GgaAffx.23494.1.S1_s_at // GgaAffx.26610.2.S1_s_at // GgaAffx.9243.3.S1_s_at // GgaAffx.23111.1.S1_s_at // Gga.16586.1.S1_at // GgaAffx.24127.1.S1_at // Gga.51.1.S1_at // …
GO:0005216	F	ion channel activity	14	456	487	24599	0.076	0.12	// GgaAffx.9792.1.S1_at // GgaAffx.10239.1.A1_at // GgaAffx.25037.1.S1_at // Gga.10147.1.S1_at // Gga.11950.1.S1_s_at // GgaAffx.23134.1.S1_at // Gga.11487.1.S1_s_at // GgaAffx.10239.1.S1_at // GgaAffx.8655.1.S1_s_at // GgaAffx.4006.1.S1_at // GgaAffx.198.1.S1_at // GgaAffx.4059.1.S1_s_at // GgaAffx.4023.1.S1_at // GgaAffx.22036.3.S1_s_at
GO:0004620	F	phospholipase activity	5	456	124	24599	0.083	0.13	// Gga.7797.1.S1_s_at // Gga.11447.1.S1_a_at // GgaAffx.26610.2.S1_s_at // GgaAffx.23494.1.S1_s_at // Gga.5922.2.S1_a_at
GO:0022838	F	substrate-specific channel activity	14	456	493	24599	0.082	0.13	// GgaAffx.9792.1.S1_at // GgaAffx.10239.1.A1_at // GgaAffx.25037.1.S1_at // Gga.10147.1.S1_at // Gga.11950.1.S1_s_at // GgaAffx.23134.1.S1_at // Gga.11487.1.S1_s_at // GgaAffx.10239.1.S1_at // GgaAffx.8655.1.S1_s_at // GgaAffx.4006.1.S1_at // GgaAffx.198.1.S1_at // GgaAffx.4059.1.S1_s_at // GgaAffx.4023.1.S1_at // GgaAffx.22036.3.S1_s_at
GO:0016301	F	kinase activity	29	456	1172	24599	0.082	0.13	// GgaAffx.6023.1.S1_at // GgaAffx.23641.3.S1_s_at // GgaAffx.4590.1.S1_at // Gga.14395.1.S1_s_at // GgaAffx.25940.1.S1_at // GgaAffx.9514.1.S1_at // GgaAffx.1241.1.S1_at // GgaAffx.6526.7.S1_s_at // GgaAffx.1528.1.S1_at // GgaAffx.26299.1.S1_s_at // GgaAffx.6314.1.S1_s_at // Gga.2908.1.S1_at // GgaAffx.26684.1.S1_at // GgaAffx.549.1.S1_at // GgaAffx.7522.1.S1_s_at // GgaAffx.21433.1.S1_s_at // G…
GO:0005249	F	voltage-gated potassium channel activity	5	456	124	24599	0.083	0.13	// Gga.11487.1.S1_s_at // GgaAffx.10239.1.S1_at // GgaAffx.10239.1.A1_at // GgaAffx.4006.1.S1_at // GgaAffx.4023.1.S1_at
GO:0017111	F	nucleoside-triphosphatase activity	24	456	945	24599	0.085	0.13	// GgaAffx.1092.1.S1_s_at // GgaAffx.13099.1.S1_at // GgaAffx.4657.1.S1_s_at // Gga.18491.1.S1_s_at // GgaAffx.25789.4.S1_s_at // GgaAffx.10968.1.S1_at // GgaAffx.23508.1.S1_at // GgaAffx.10104.2.S1_s_at // GgaAffx.8115.3.S1_s_at // GgaAffx.10968.2.S1_s_at // GgaAffx.4442.3.S1_s_at // Gga.7294.1.S1_at // GgaAffx.22730.1.S1_at // GgaAffx.1279.2.S1_s_at // Gga.1828.1.S1_at // Gga.637.1.S1_at // Gga…
GO:0005516	F	calmodulin binding	6	456	164	24599	0.087	0.13	// GgaAffx.2572.1.S1_at // GgaAffx.23508.1.S1_at // GgaAffx.542.1.S1_at // GgaAffx.7255.1.S1_at // GgaAffx.1279.2.S1_s_at // Gga.637.1.S1_at
GO:0031406	F	carboxylic acid binding	5	456	126	24599	0.087	0.13	// Gga.4425.1.S1_at // Gga.11343.1.S1_at // GgaAffx.24934.1.S1_s_at // GgaAffx.2648.1.S1_s_at // Gga.6085.3.S1_a_at
GO:0016791	F	phosphatase activity	9	456	287	24599	0.091	0.13	// GgaAffx.24127.1.S1_at // Gga.7186.2.S1_a_at // GgaAffx.681.3.S1_s_at // GgaAffx.23111.1.S1_s_at // GgaAffx.7526.1.S1_at // Gga.2475.1.S1_at // GgaAffx.5993.1.S1_at // GgaAffx.25392.2.S1_s_at // GgaAffx.3218.1.S1_s_at
GO:0022832	F	voltage-gated channel activity	8	456	246	24599	0.092	0.13	// GgaAffx.10239.1.A1_at // GgaAffx.25037.1.S1_at // Gga.11950.1.S1_s_at // Gga.11487.1.S1_s_at // GgaAffx.10239.1.S1_at // GgaAffx.4006.1.S1_at // GgaAffx.4023.1.S1_at // GgaAffx.22036.3.S1_s_at
GO:0030234	F	enzyme regulator activity	26	456	1044	24599	0.09	0.13	// GgaAffx.2108.1.S1_at // GgaAffx.23641.3.S1_s_at // GgaAffx.4249.1.S1_x_at // Gga.5263.3.S1_s_at // Gga.6009.1.S1_s_at // GgaAffx.22594.1.S1_s_at // GgaAffx.6526.7.S1_s_at // GgaAffx.23971.1.S1_at // GgaAffx.4150.2.S1_s_at // Gga.4119.1.S1_at // Gga.12255.1.S1_s_at // GgaAffx.6799.1.S1_s_at // GgaAffx.21483.1.S1_at // Gga.4055.1.S1_at // Gga.6976.1.S1_at // Gga.19274.1.S1_s_at // GgaAffx.7879.1…
GO:0005244	F	voltage-gated ion channel activity	8	456	246	24599	0.092	0.13	// GgaAffx.10239.1.A1_at // GgaAffx.25037.1.S1_at // Gga.11950.1.S1_s_at // Gga.11487.1.S1_s_at // GgaAffx.10239.1.S1_at // GgaAffx.4006.1.S1_at // GgaAffx.4023.1.S1_at // GgaAffx.22036.3.S1_s_at
GO:0008081	F	phosphoric diester hydrolase activity	5	456	127	24599	0.089	0.13	// GgaAffx.26610.2.S1_s_at // GgaAffx.25677.1.S1_s_at // GgaAffx.24884.1.S1_s_at // GgaAffx.1852.2.S1_s_at // GgaAffx.23494.1.S1_s_at
GO:0015267	F	channel activity	14	456	507	24599	0.097	0.14	// GgaAffx.9792.1.S1_at // GgaAffx.10239.1.A1_at // GgaAffx.25037.1.S1_at // Gga.10147.1.S1_at // Gga.11950.1.S1_s_at // GgaAffx.23134.1.S1_at // Gga.11487.1.S1_s_at // GgaAffx.10239.1.S1_at // GgaAffx.8655.1.S1_s_at // GgaAffx.4006.1.S1_at // GgaAffx.198.1.S1_at // GgaAffx.4059.1.S1_s_at // GgaAffx.4023.1.S1_at // GgaAffx.22036.3.S1_s_at
GO:0022803	F	passive transmembrane transporter activity	14	456	507	24599	0.097	0.14	// GgaAffx.9792.1.S1_at // GgaAffx.10239.1.A1_at // GgaAffx.25037.1.S1_at // Gga.10147.1.S1_at // Gga.11950.1.S1_s_at // GgaAffx.23134.1.S1_at // Gga.11487.1.S1_s_at // GgaAffx.10239.1.S1_at // GgaAffx.8655.1.S1_s_at // GgaAffx.4006.1.S1_at // GgaAffx.198.1.S1_at // GgaAffx.4059.1.S1_s_at // GgaAffx.4023.1.S1_at // GgaAffx.22036.3.S1_s_at
GO:0016879	F	ligase activity, forming carbon-nitrogen bonds	9	456	299	24599	0.11	0.15	// GgaAffx.6430.1.S1_at // GgaAffx.25682.1.S1_s_at // GgaAffx.21140.1.S1_s_at // GgaAffx.24941.1.S1_at // Gga.63.1.S1_s_at // GgaAffx.21089.1.S1_s_at // Gga.10623.1.S1_s_at // GgaAffx.24934.1.S1_s_at // GgaAffx.24941.1.S1_s_at
GO:0030695	F	GTPase regulator activity	16	456	613	24599	0.12	0.16	// Gga.12255.1.S1_s_at // GgaAffx.23641.3.S1_s_at // GgaAffx.4150.2.S1_s_at // GgaAffx.23564.2.S1_s_at // GgaAffx.23971.1.S1_at // Gga.5263.3.S1_s_at // Gga.6009.1.S1_s_at // Gga.4119.1.S1_at // GgaAffx.21483.1.S1_at // GgaAffx.7879.1.S1_at // GgaAffx.26615.2.S1_s_at // GgaAffx.24709.1.S1_s_at // GgaAffx.6799.1.S1_s_at // Gga.10758.1.S1_at // GgaAffx.789.1.S1_at // GgaAffx.8903.3.S1_at
GO:0005083	F	small GTPase regulator activity	12	456	440	24599	0.12	0.17	// Gga.12255.1.S1_s_at // GgaAffx.23641.3.S1_s_at // GgaAffx.4150.2.S1_s_at // GgaAffx.23564.2.S1_s_at // Gga.5263.3.S1_s_at // Gga.6009.1.S1_s_at // GgaAffx.21483.1.S1_at // GgaAffx.7879.1.S1_at // GgaAffx.23971.1.S1_at // GgaAffx.24709.1.S1_s_at // GgaAffx.6799.1.S1_s_at // Gga.4119.1.S1_at
GO:0060589	F	nucleoside-triphosphatase regulator activity	16	456	621	24599	0.12	0.17	// Gga.12255.1.S1_s_at // GgaAffx.23641.3.S1_s_at // GgaAffx.4150.2.S1_s_at // GgaAffx.23564.2.S1_s_at // GgaAffx.23971.1.S1_at // Gga.5263.3.S1_s_at // Gga.6009.1.S1_s_at // Gga.4119.1.S1_at // GgaAffx.21483.1.S1_at // GgaAffx.7879.1.S1_at // GgaAffx.26615.2.S1_s_at // GgaAffx.24709.1.S1_s_at // GgaAffx.6799.1.S1_s_at // Gga.10758.1.S1_at // GgaAffx.789.1.S1_at // GgaAffx.8903.3.S1_at
GO:0016298	F	lipase activity	5	456	146	24599	0.14	0.19	// Gga.7797.1.S1_s_at // Gga.11447.1.S1_a_at // GgaAffx.26610.2.S1_s_at // GgaAffx.23494.1.S1_s_at // Gga.5922.2.S1_a_at
GO:0015294	F	solute:cation symporter activity	5	456	147	24599	0.14	0.19	// Gga.267.1.S1_at // GgaAffx.9310.1.S1_s_at // GgaAffx.2712.2.S1_s_at // GgaAffx.22340.1.S1_s_at // GgaAffx.10140.2.S1_s_at
GO:0008415	F	acyltransferase activity	6	456	189	24599	0.14	0.19	// GgaAffx.20100.1.S1_at // Gga.16586.1.S1_at // GgaAffx.23976.1.S1_at // GgaAffx.24459.2.S1_s_at // Gga.6085.3.S1_a_at // GgaAffx.9403.1.S1_s_at
GO:0004857	F	enzyme inhibitor activity	8	456	278	24599	0.15	0.2	// GgaAffx.2108.1.S1_at // Gga.19274.1.S1_s_at // GgaAffx.8887.1.S1_s_at // GgaAffx.4249.1.S1_x_at // GgaAffx.22594.1.S1_s_at // GgaAffx.5618.1.S1_at // Gga.4055.1.S1_at // Gga.6976.1.S1_at
GO:0016747	F	transferase activity, transferring acyl groups other than amino-acyl groups	6	456	193	24599	0.15	0.2	// GgaAffx.20100.1.S1_at // Gga.16586.1.S1_at // GgaAffx.23976.1.S1_at // GgaAffx.24459.2.S1_s_at // Gga.6085.3.S1_a_at // GgaAffx.9403.1.S1_s_at
GO:0008289	F	lipid binding	13	456	512	24599	0.16	0.22	// GgaAffx.23840.1.S1_s_at // GgaAffx.23564.2.S1_s_at // GgaAffx.12155.1.S1_s_at // Gga.11217.1.S1_at // Gga.4425.1.S1_at // Gga.10037.1.S1_s_at // GgaAffx.1474.1.S1_at // GgaAffx.7879.1.S1_at // GgaAffx.10564.2.S1_s_at // GgaAffx.24196.1.S1_s_at // GgaAffx.789.1.S1_at // GgaAffx.2648.1.S1_s_at // Gga.4119.1.S1_at
GO:0005261	F	cation channel activity	10	456	377	24599	0.17	0.22	// GgaAffx.9792.1.S1_at // GgaAffx.10239.1.A1_at // Gga.10147.1.S1_at // Gga.11950.1.S1_s_at // Gga.11487.1.S1_s_at // GgaAffx.10239.1.S1_at // GgaAffx.8655.1.S1_s_at // GgaAffx.4006.1.S1_at // GgaAffx.4023.1.S1_at // GgaAffx.22036.3.S1_s_at
[truncated: 147 more rows]
